# Supplementary material for: Design, Synthesis, and Antiproliferative Activity of Benzopyran-4-One-Isoxazole Hybrid Compounds
Source: MDPI journal article supplement (doi:10.3390/molecules28104220), 2023-05-21

# **Design, Synthesis, and Antiproliferative Activity of Benzopyran-4-one-Isoxazole Hybrid Compounds**

Shilpi Gupta,<sup>a,b</sup> Shang Eun Park,<sup>a</sup> Saghar Mozaffari,<sup>a</sup> Bishoy El-Aarag,<sup>a,c</sup> Keykavous Parang,<sup>a</sup> and Rakesh Kumar Tiwari<sup>a,\*</sup>

<sup>a</sup>Center for Targeted Drug Delivery, Department of Biomedical and Pharmaceutical Sciences, Chapman University School of Pharmacy, Harry and Diane Rinker Health Science Campus, Irvine, CA 92618-1908, USA;

<sup>b</sup>Department of Chemistry, Hindu College, Sonipat, Haryana 131001, India;

<sup>c</sup>Biochemistry Division, Chemistry Department, Faculty of Science, Menoufia University, Shebin El-Koom 32512, Egypt

## **Table of Contents:**

|                                                                             |       |
|-----------------------------------------------------------------------------|-------|
| <sup>1</sup> H & <sup>13</sup> C NMR &/or DEPT-135 spectra of compounds 2-9 | 2-65  |
| Analytical HPLC analysis of compounds 5a-5d                                 | 66-70 |
| Cytotoxicity data for starting materials and intermediates                  | 71-78 |
| Antiproliferative activity (%) data on treatment with Dox & 5a-5d           | 79    |
| Anti-proliferative activity (%) data on non-cancerous cell lines            | 80    |
| Serum stability studies data                                                | 81-85 |

Figure S1.1.  $^1\text{H}$  NMR spectra of compound 2a

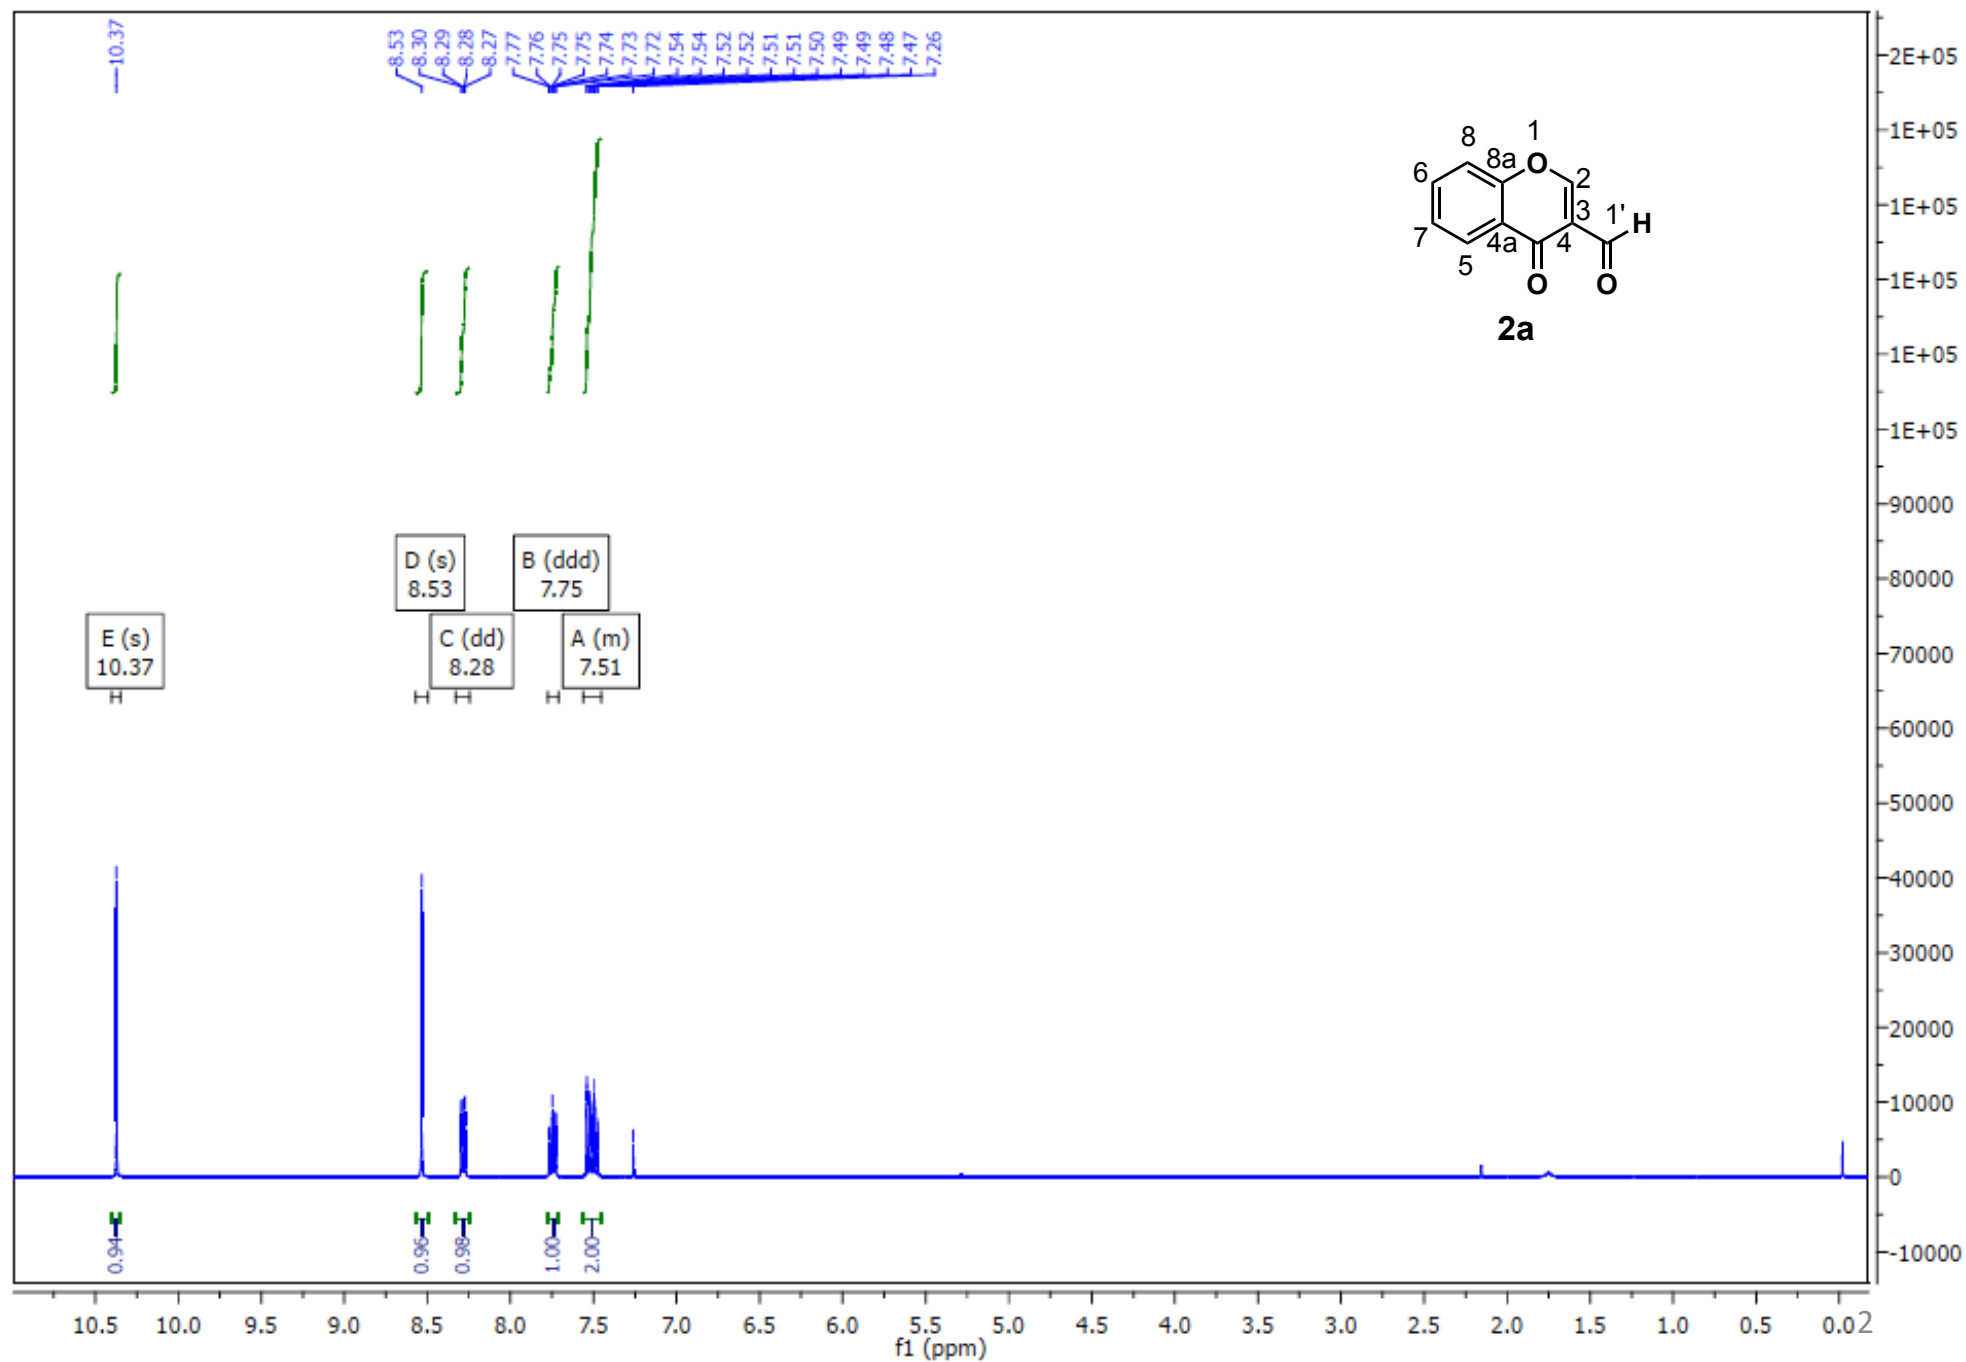

Figure S1.2.  $^{13}\text{C}$  NMR spectra of compound 2a

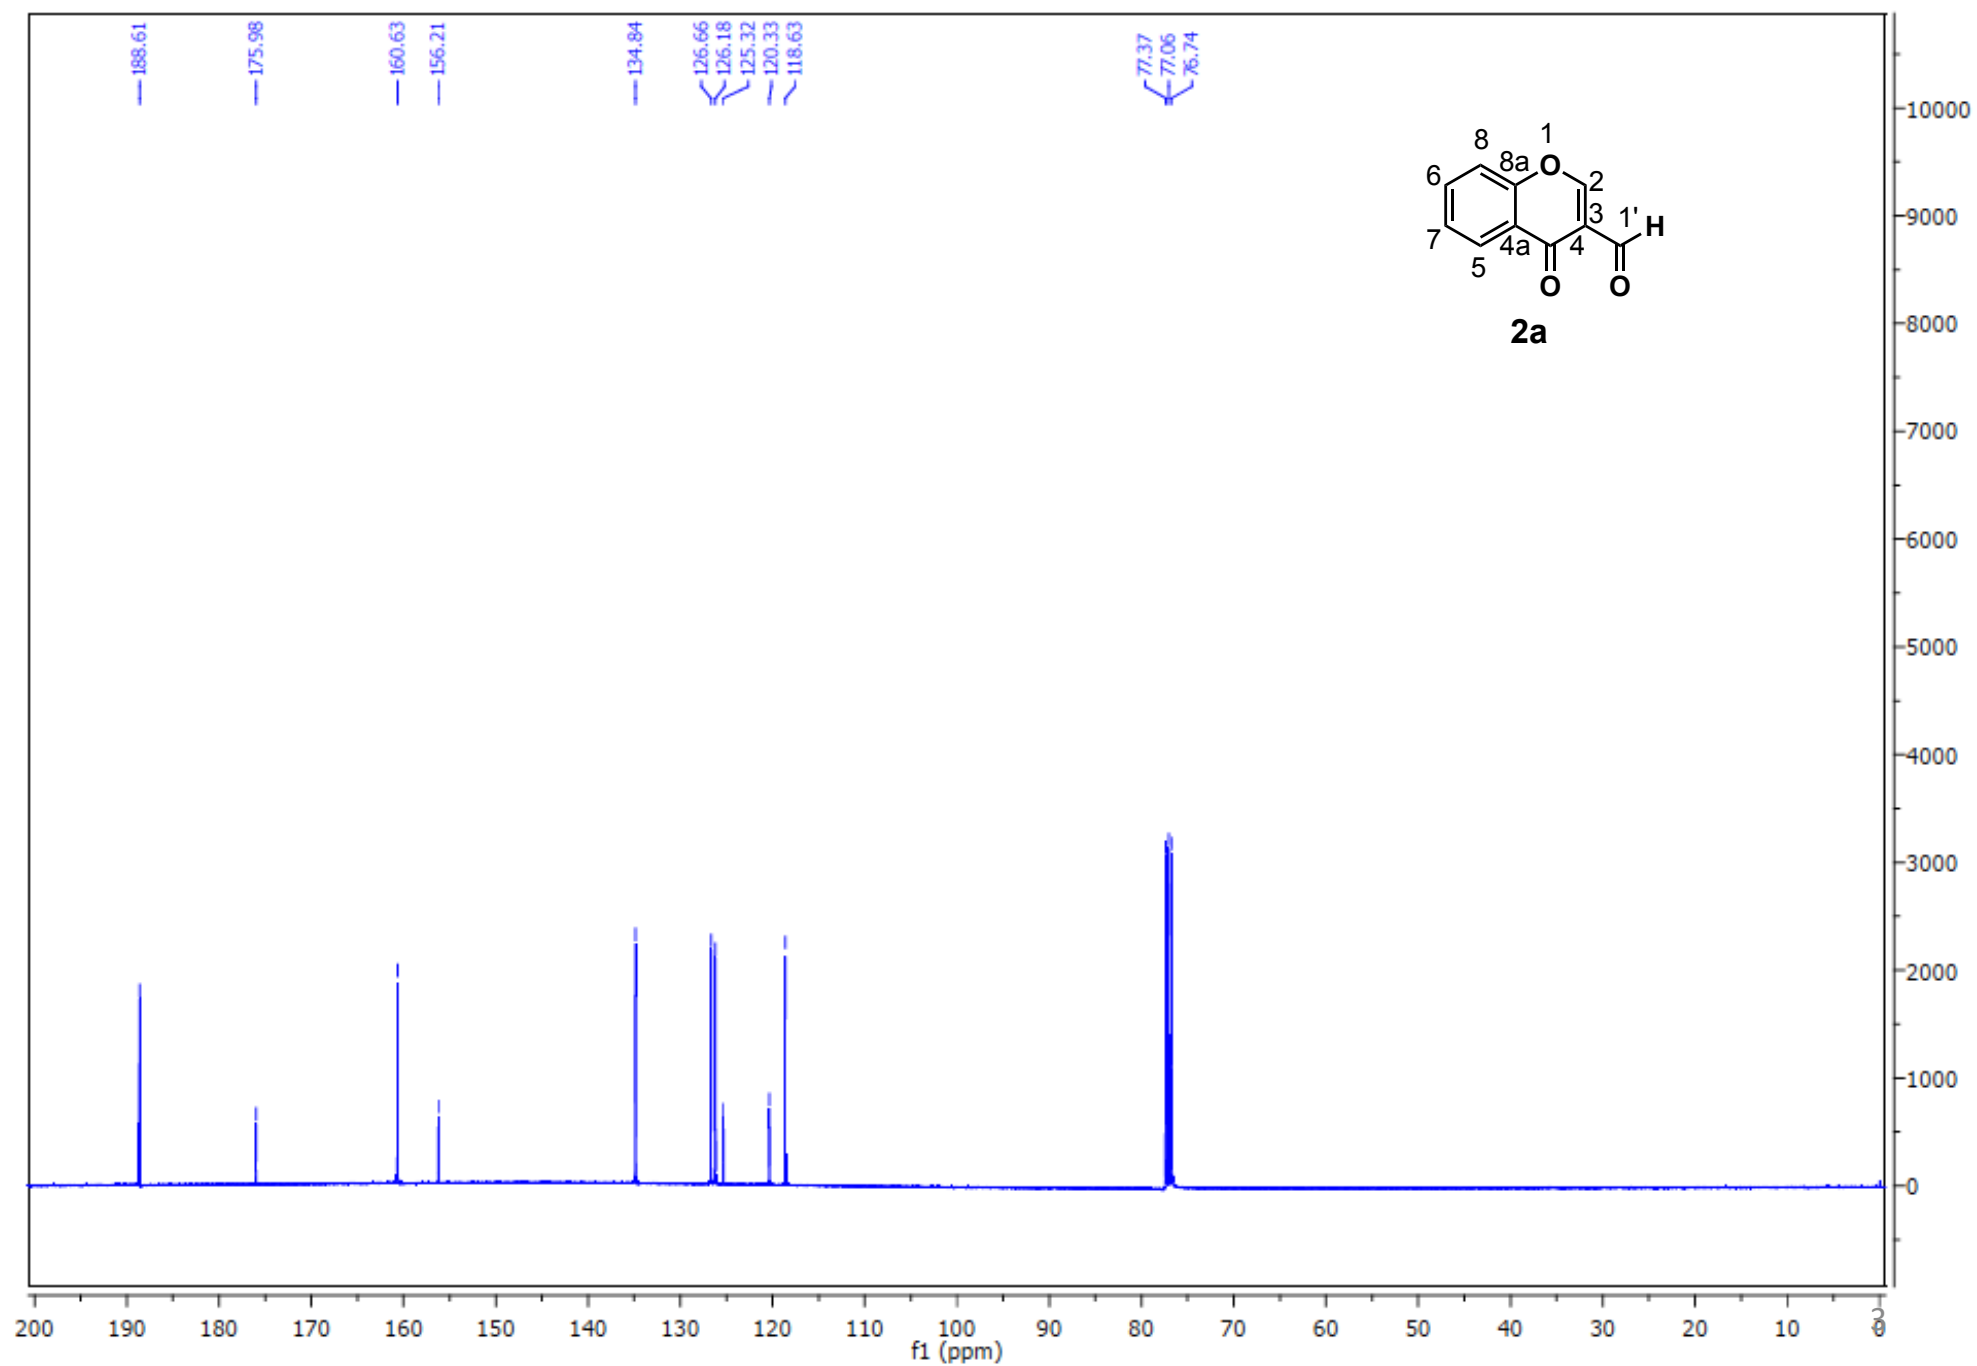

Figure S2.1.  $^1\text{H}$  NMR spectra of compound 2b

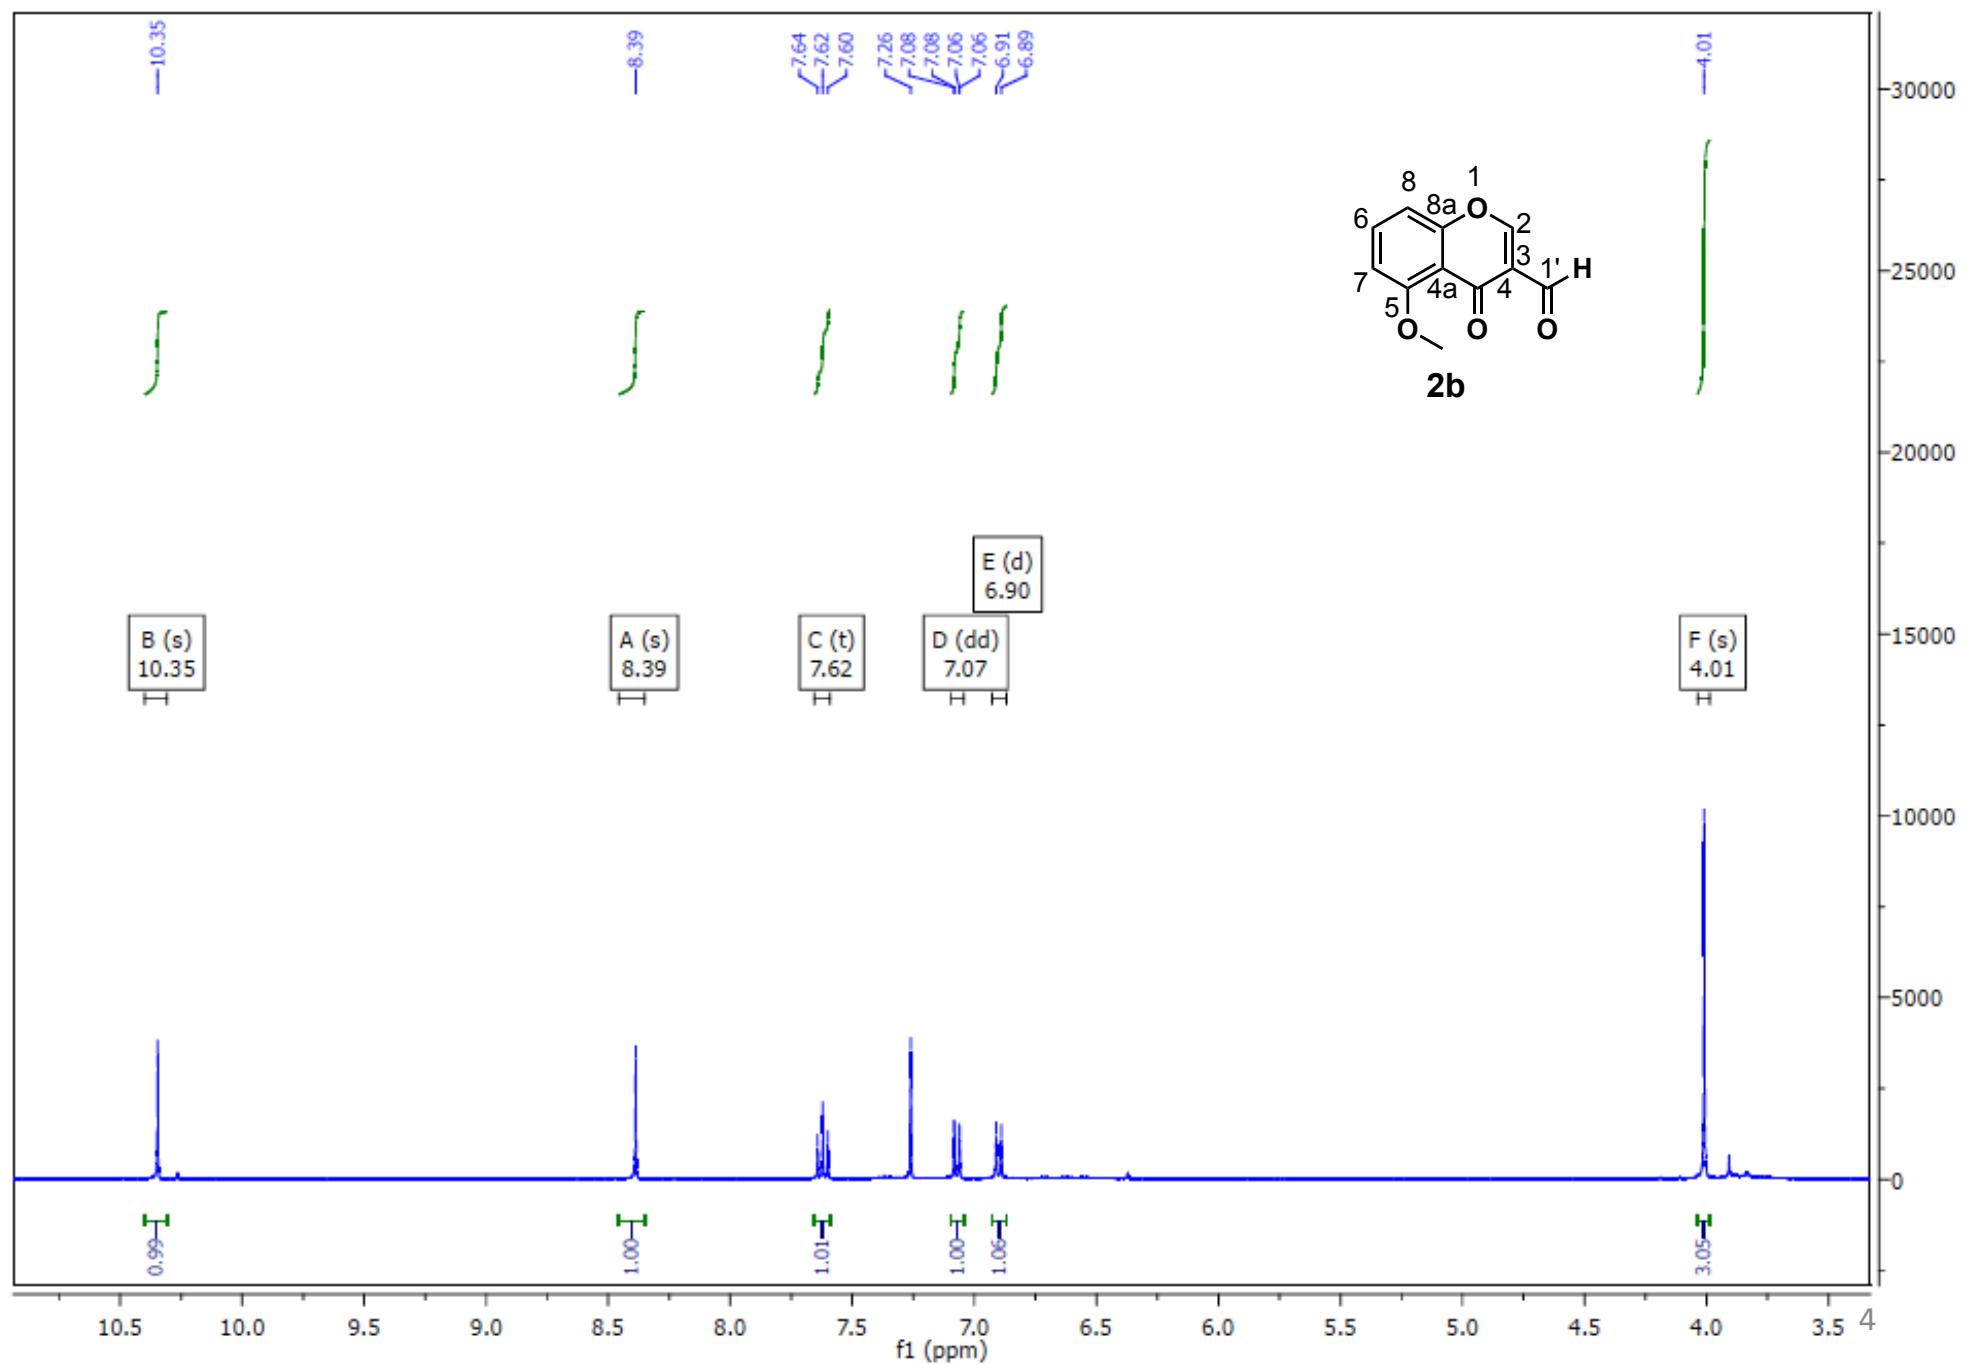

Figure S2.2.  $^{13}\text{C}$  NMR spectra of compound 2b

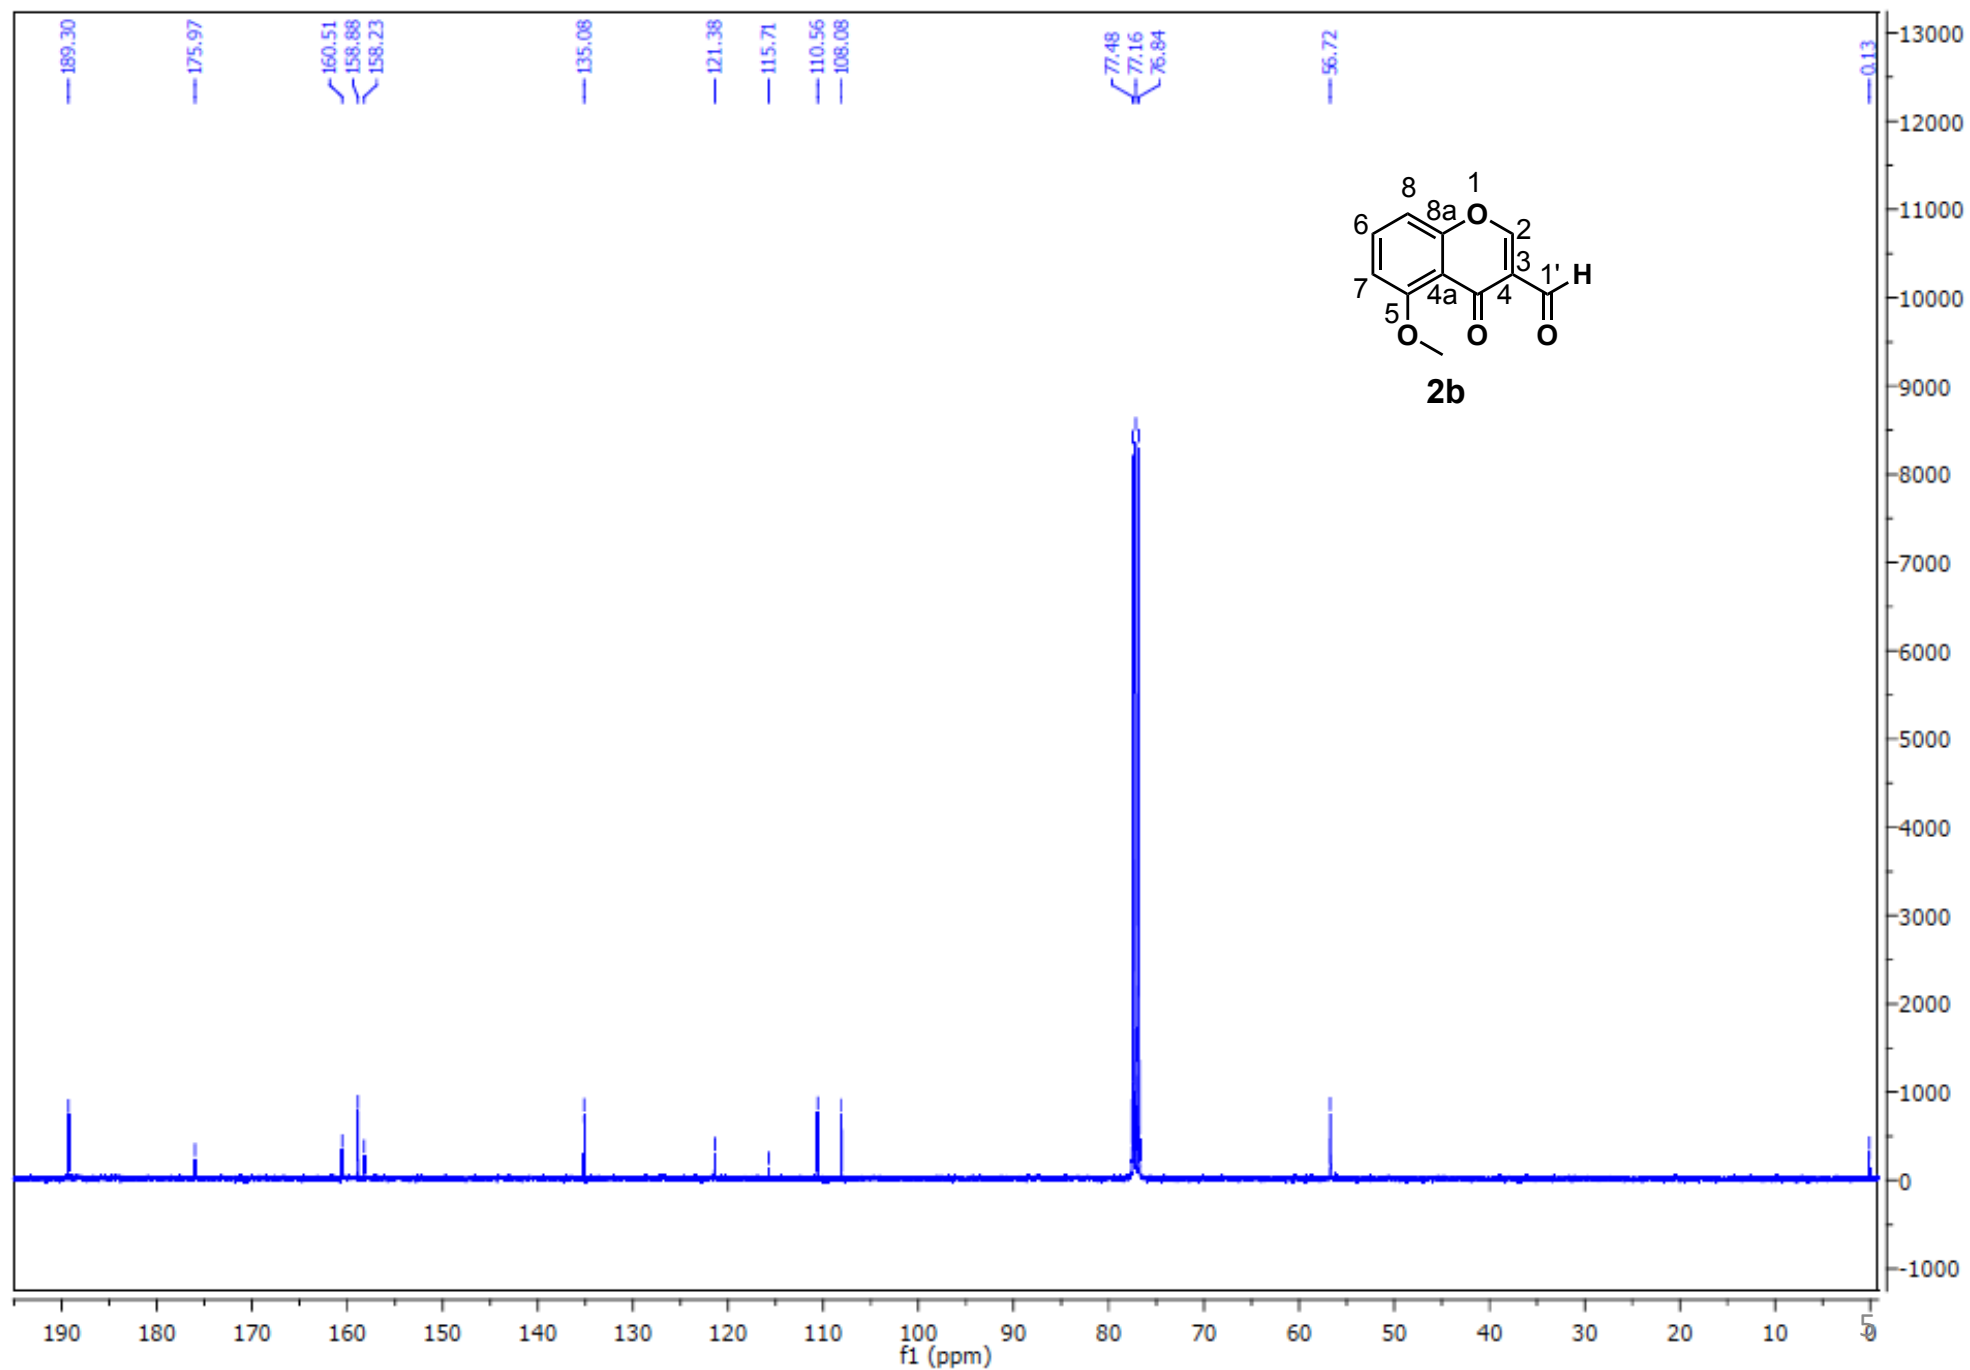

Figure S3.1.  $^1\text{H}$  NMR spectra of compound 2c

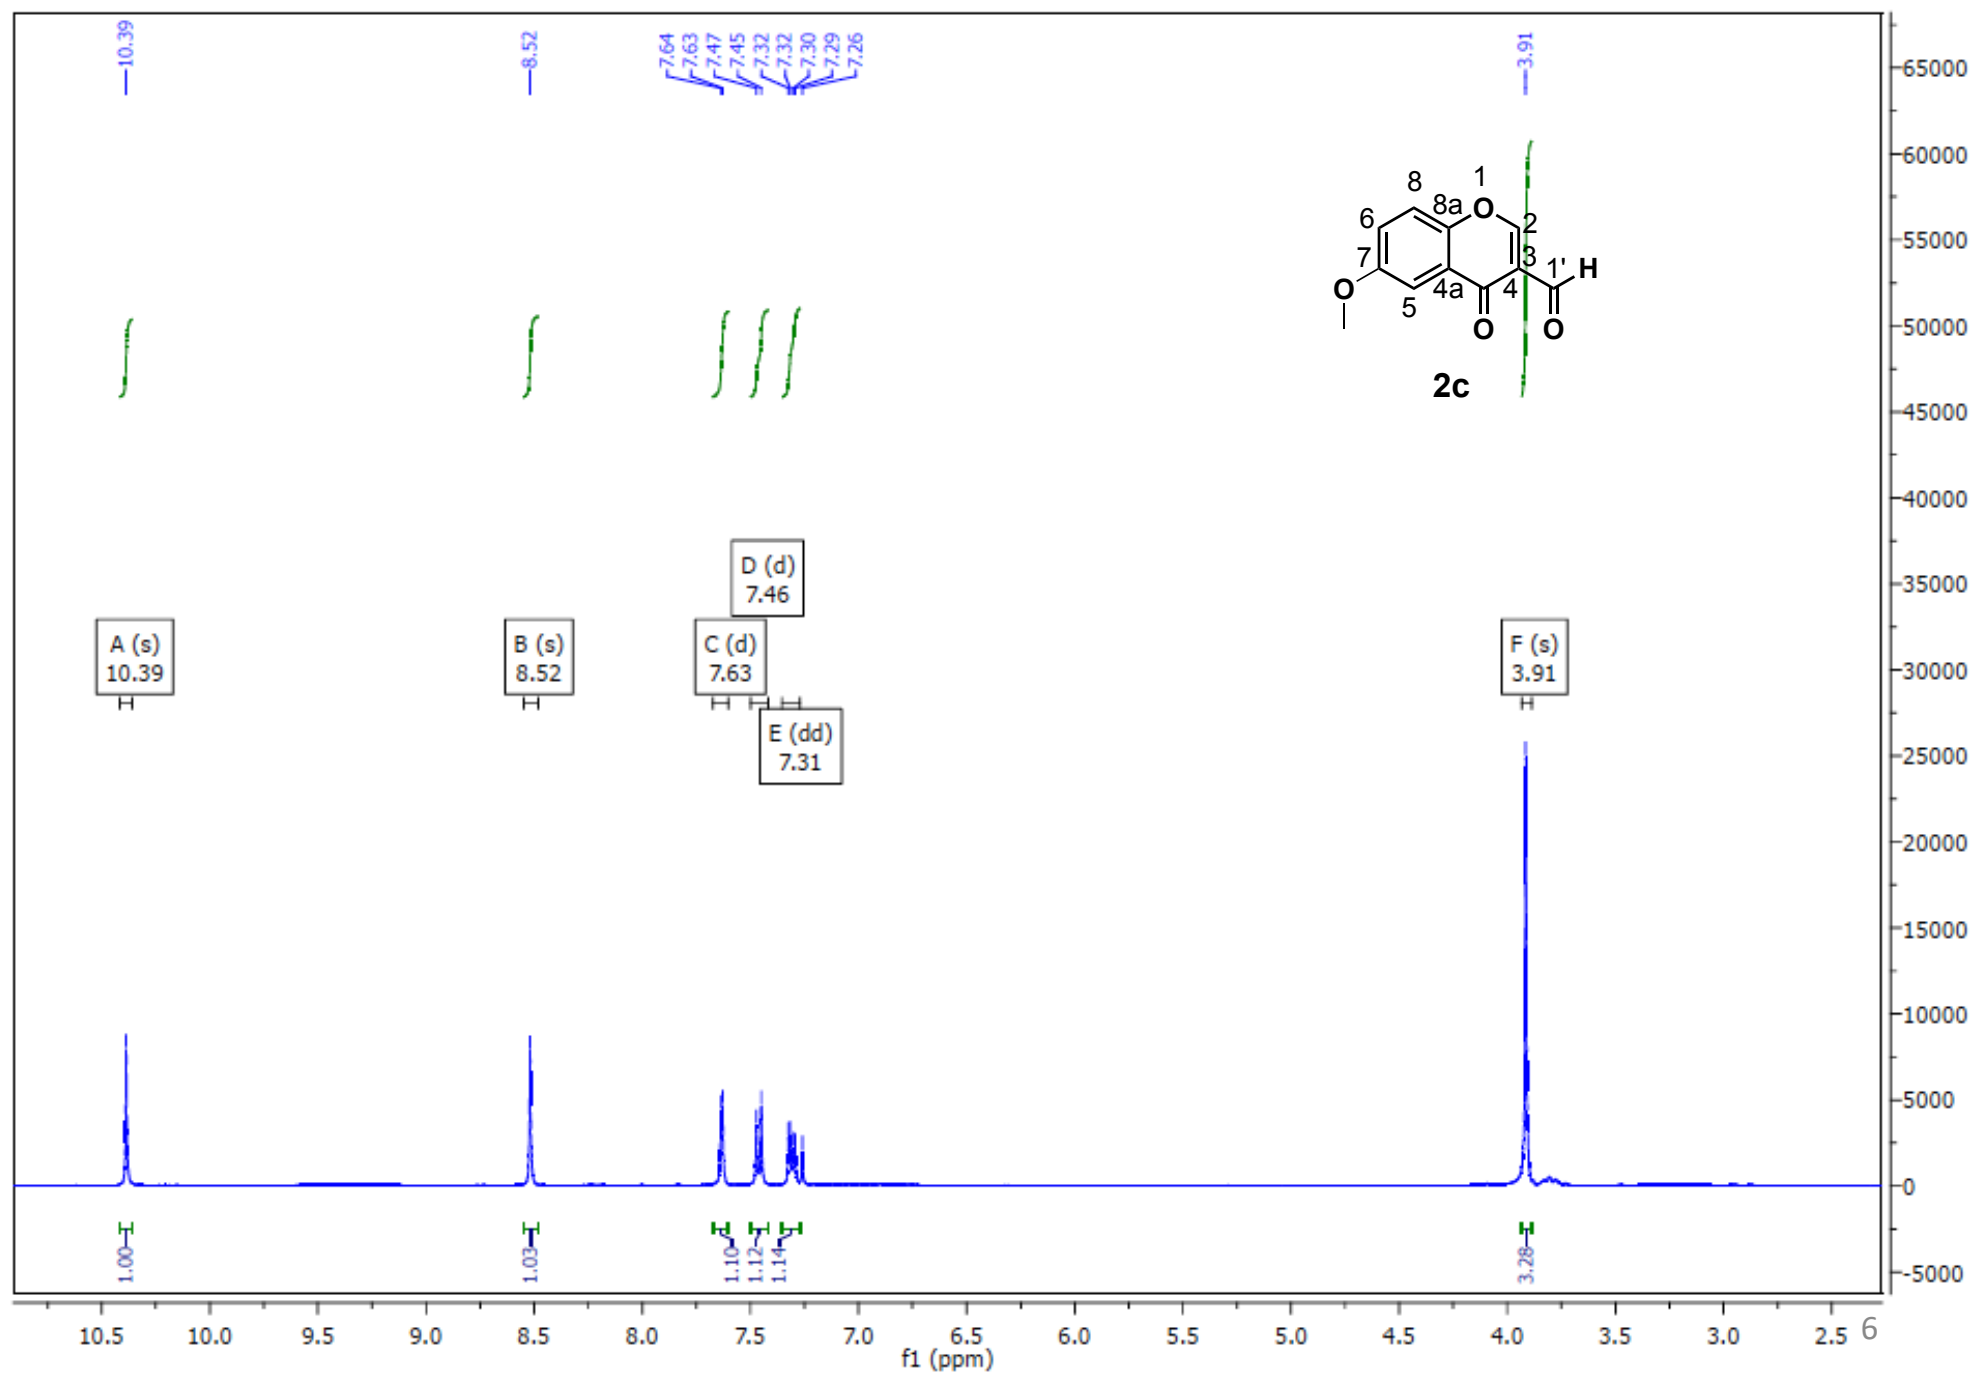

Figure S3.2.  $^{13}\text{C}$  NMR spectra of compound 2c

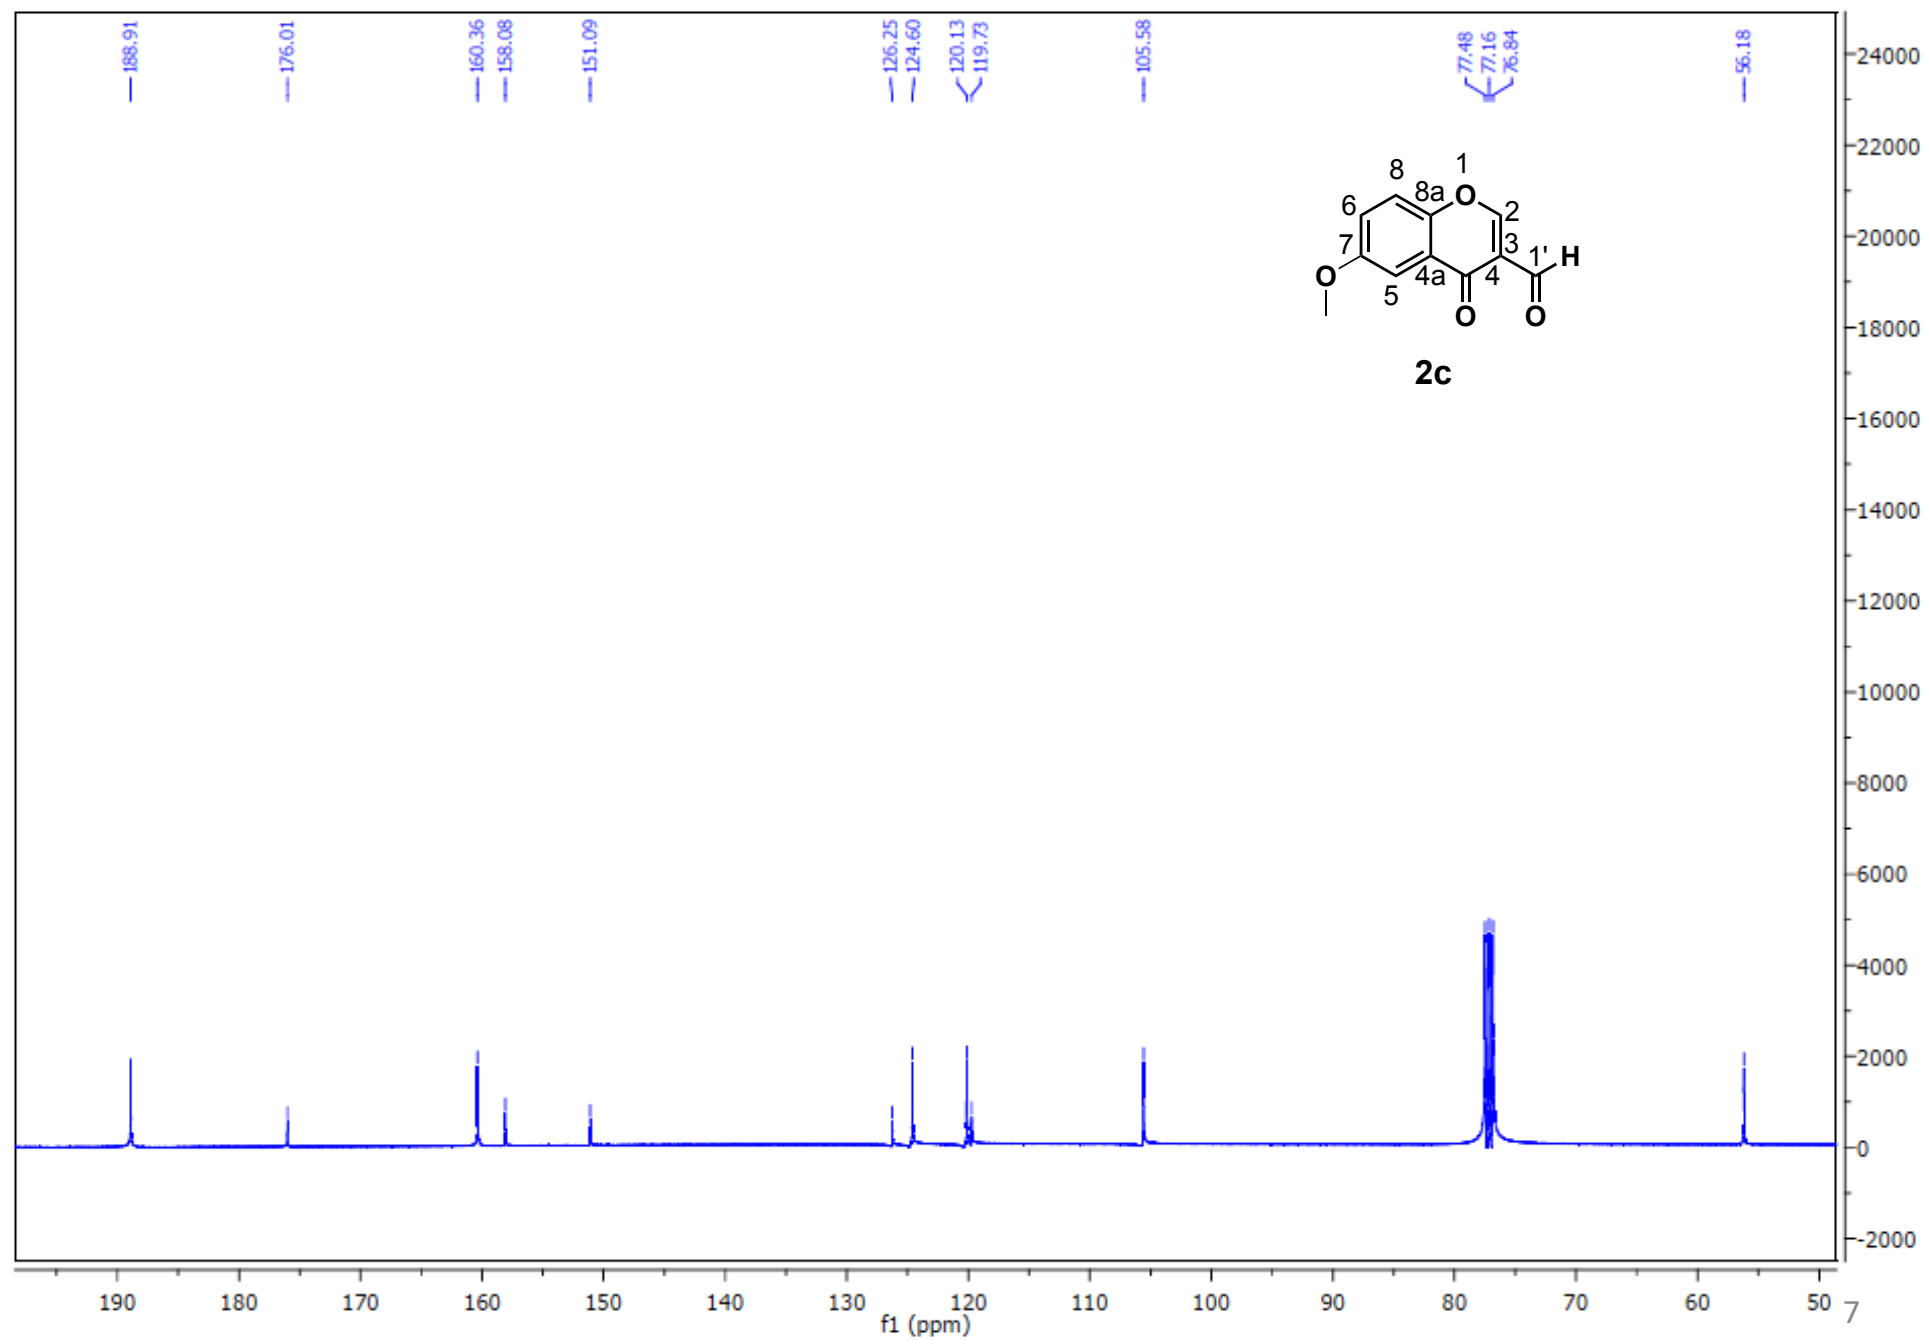

Figure S4.1.  $^1\text{H}$  NMR spectra of compound 2d intermediate

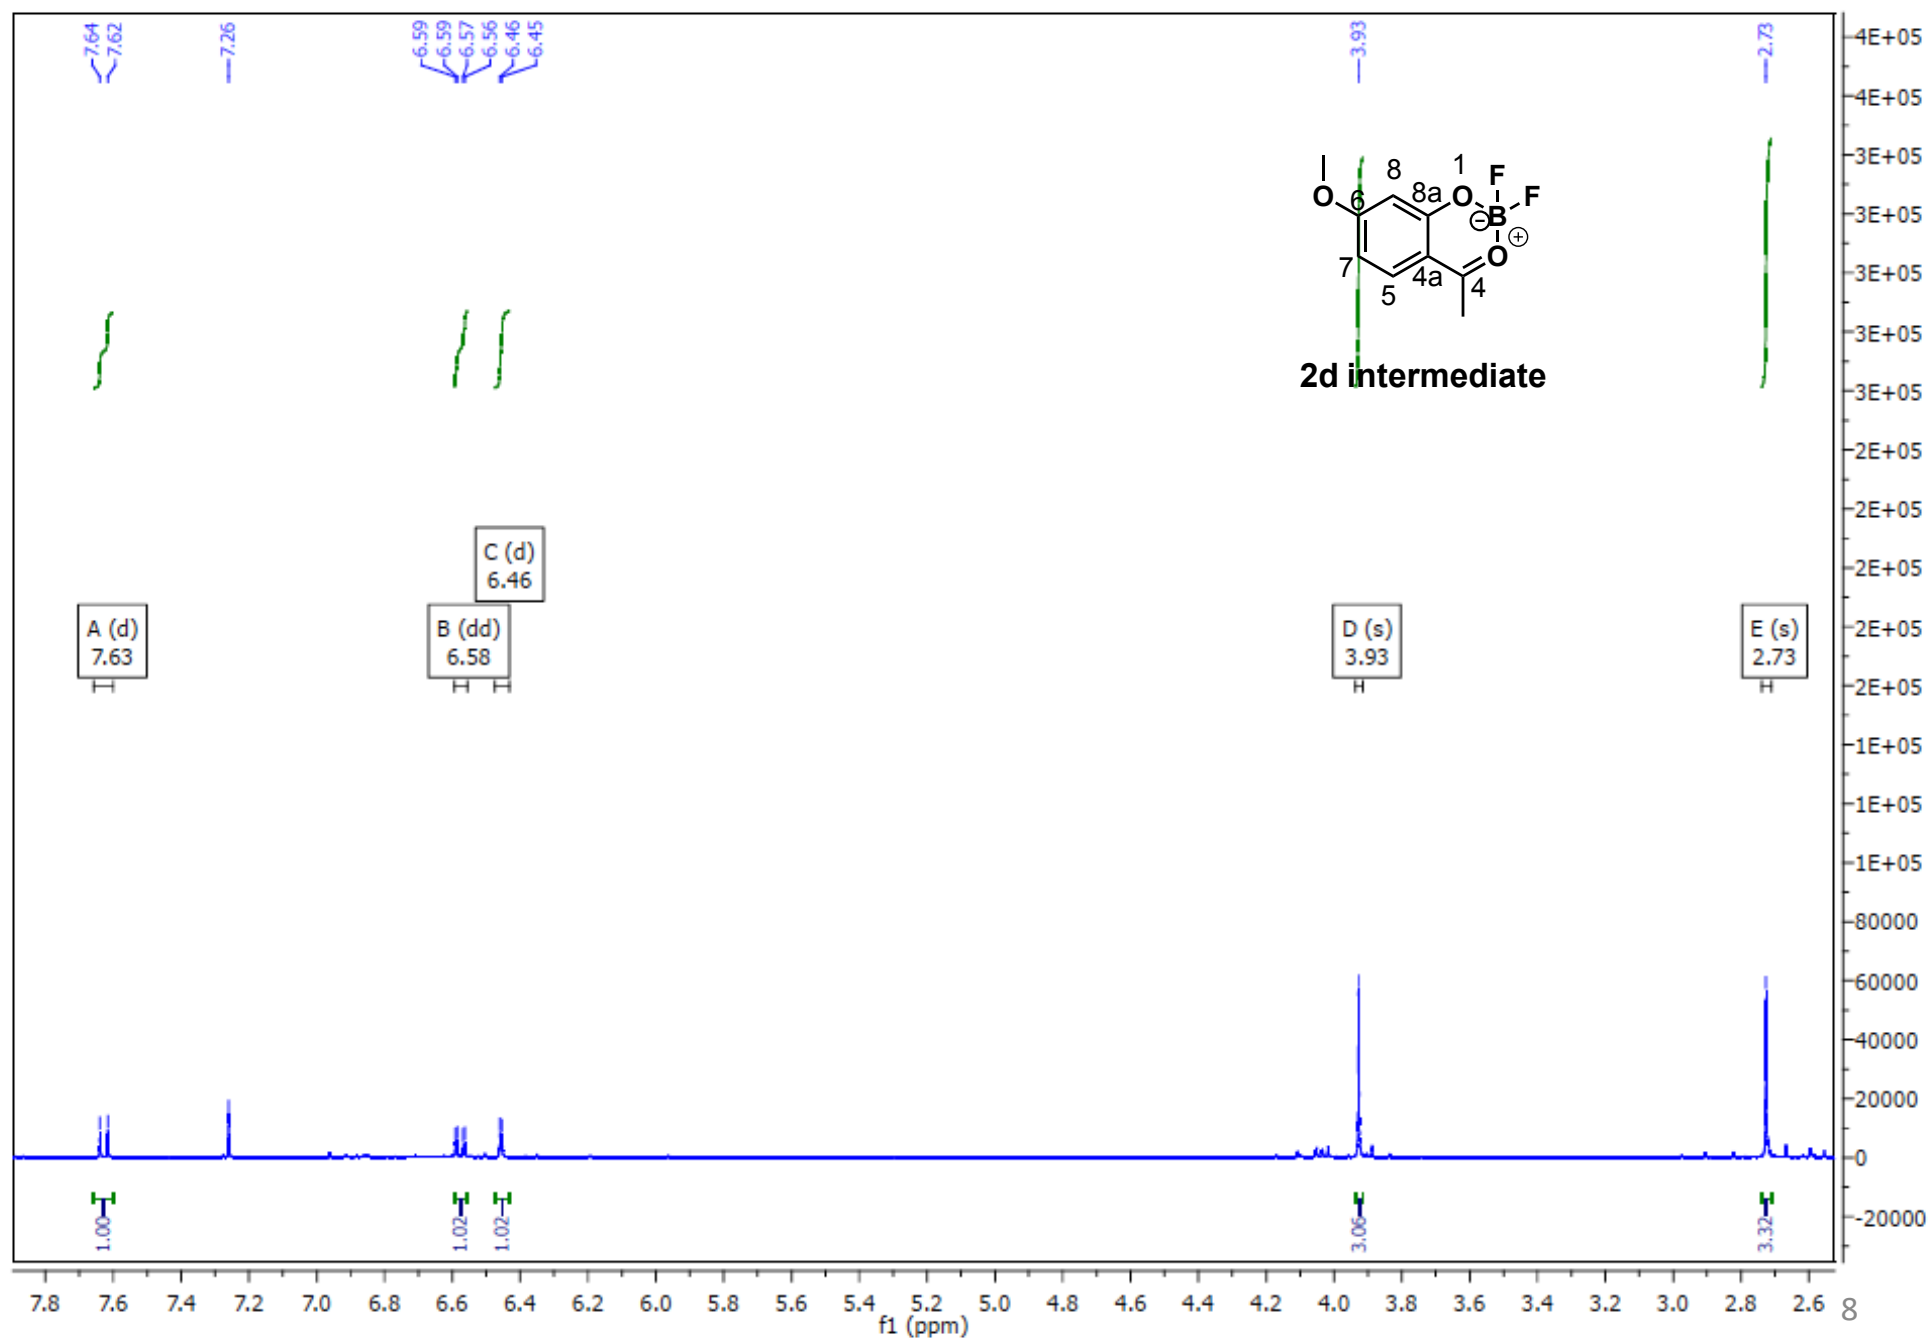



Figure S4.2.  $^1\text{H}$  NMR spectra of compound 2d

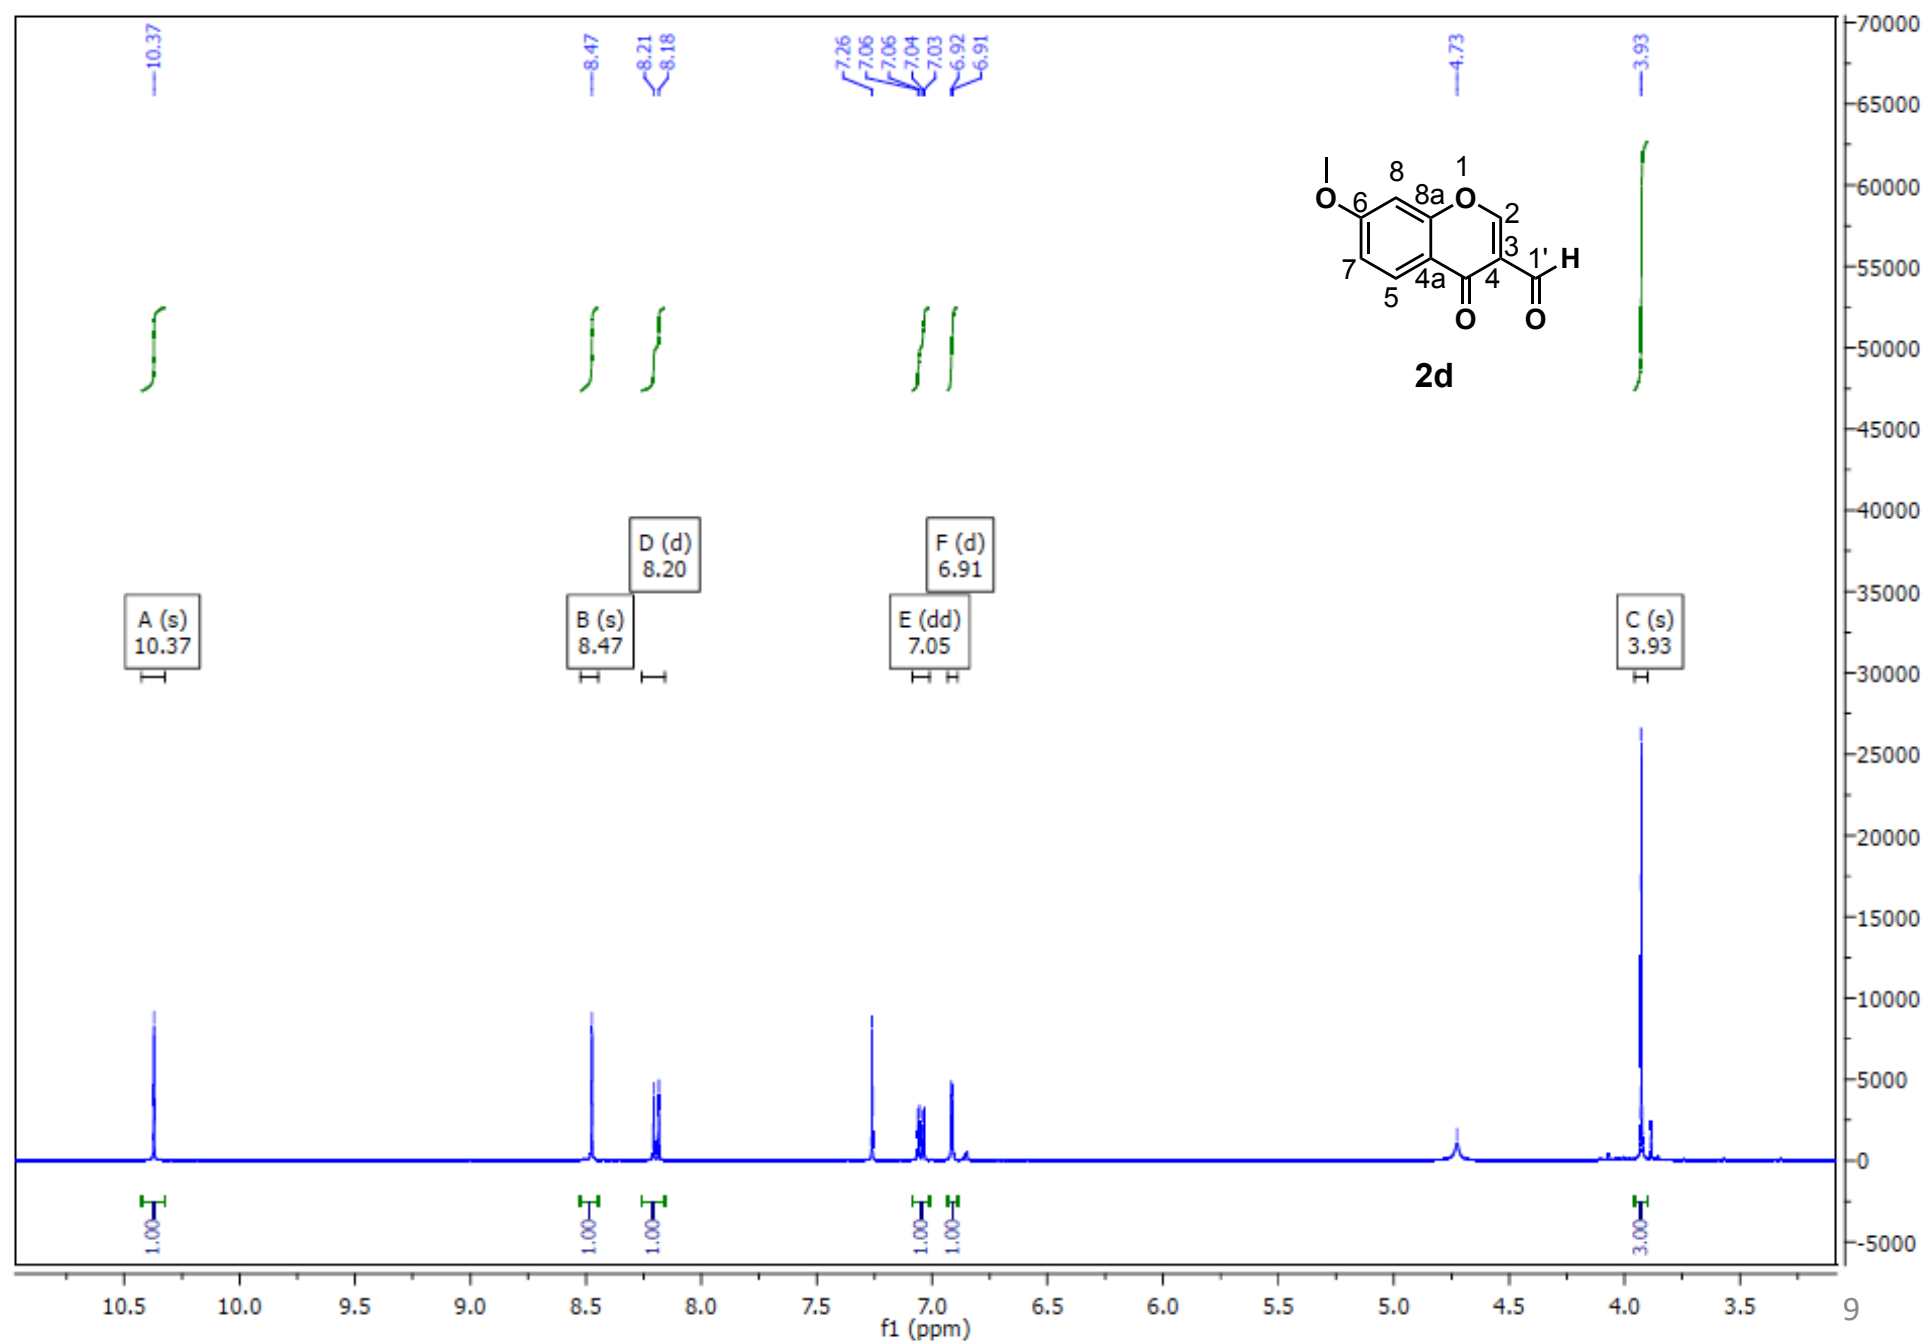

Figure S4.3.  $^{13}\text{C}$  NMR spectra of compound 2d

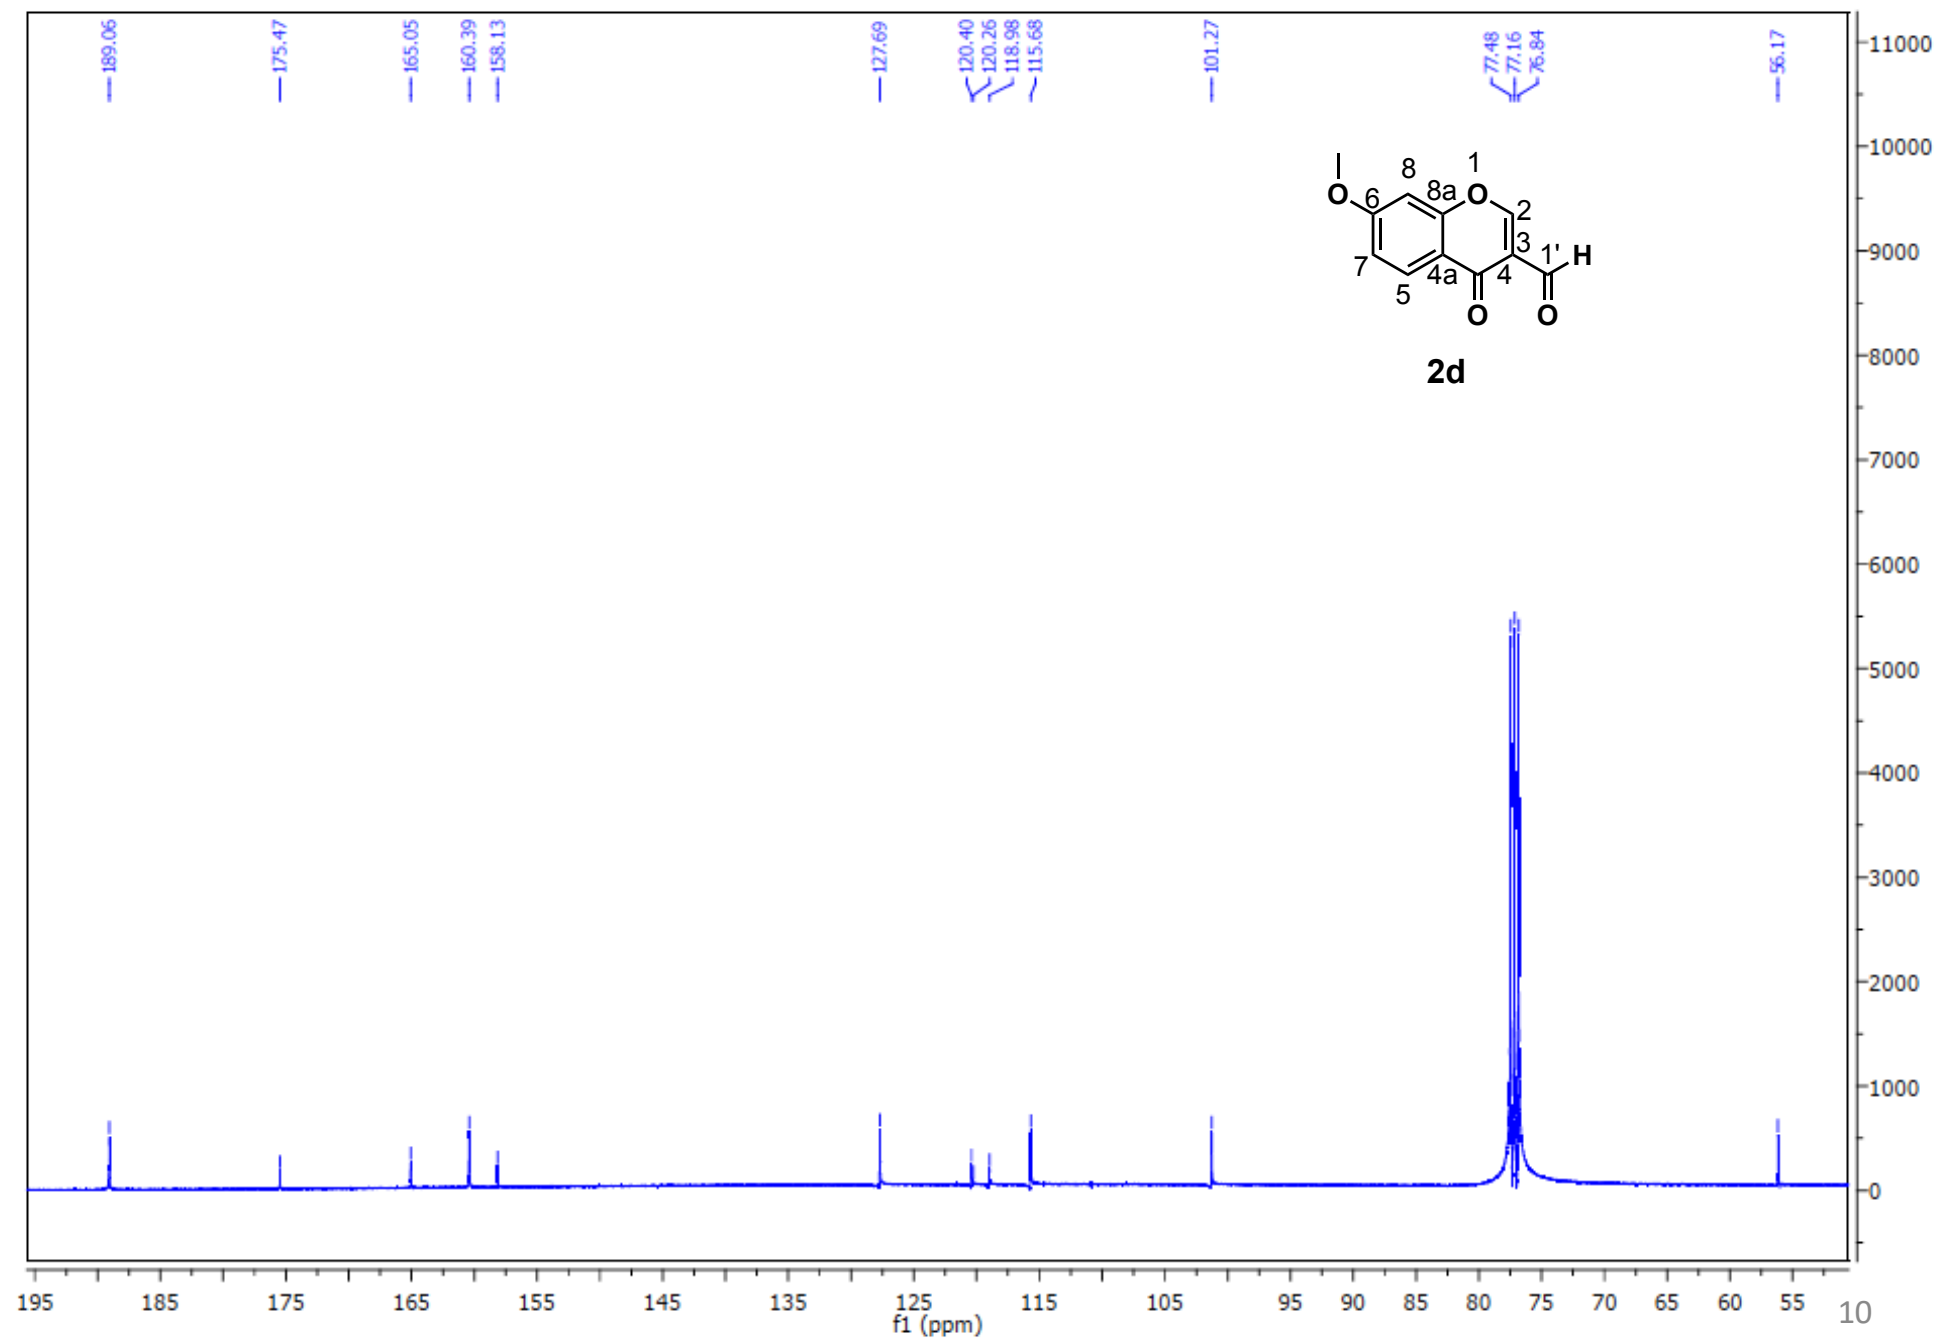

Figure S5.1.  $^1\text{H}$  NMR spectra of compound 3a

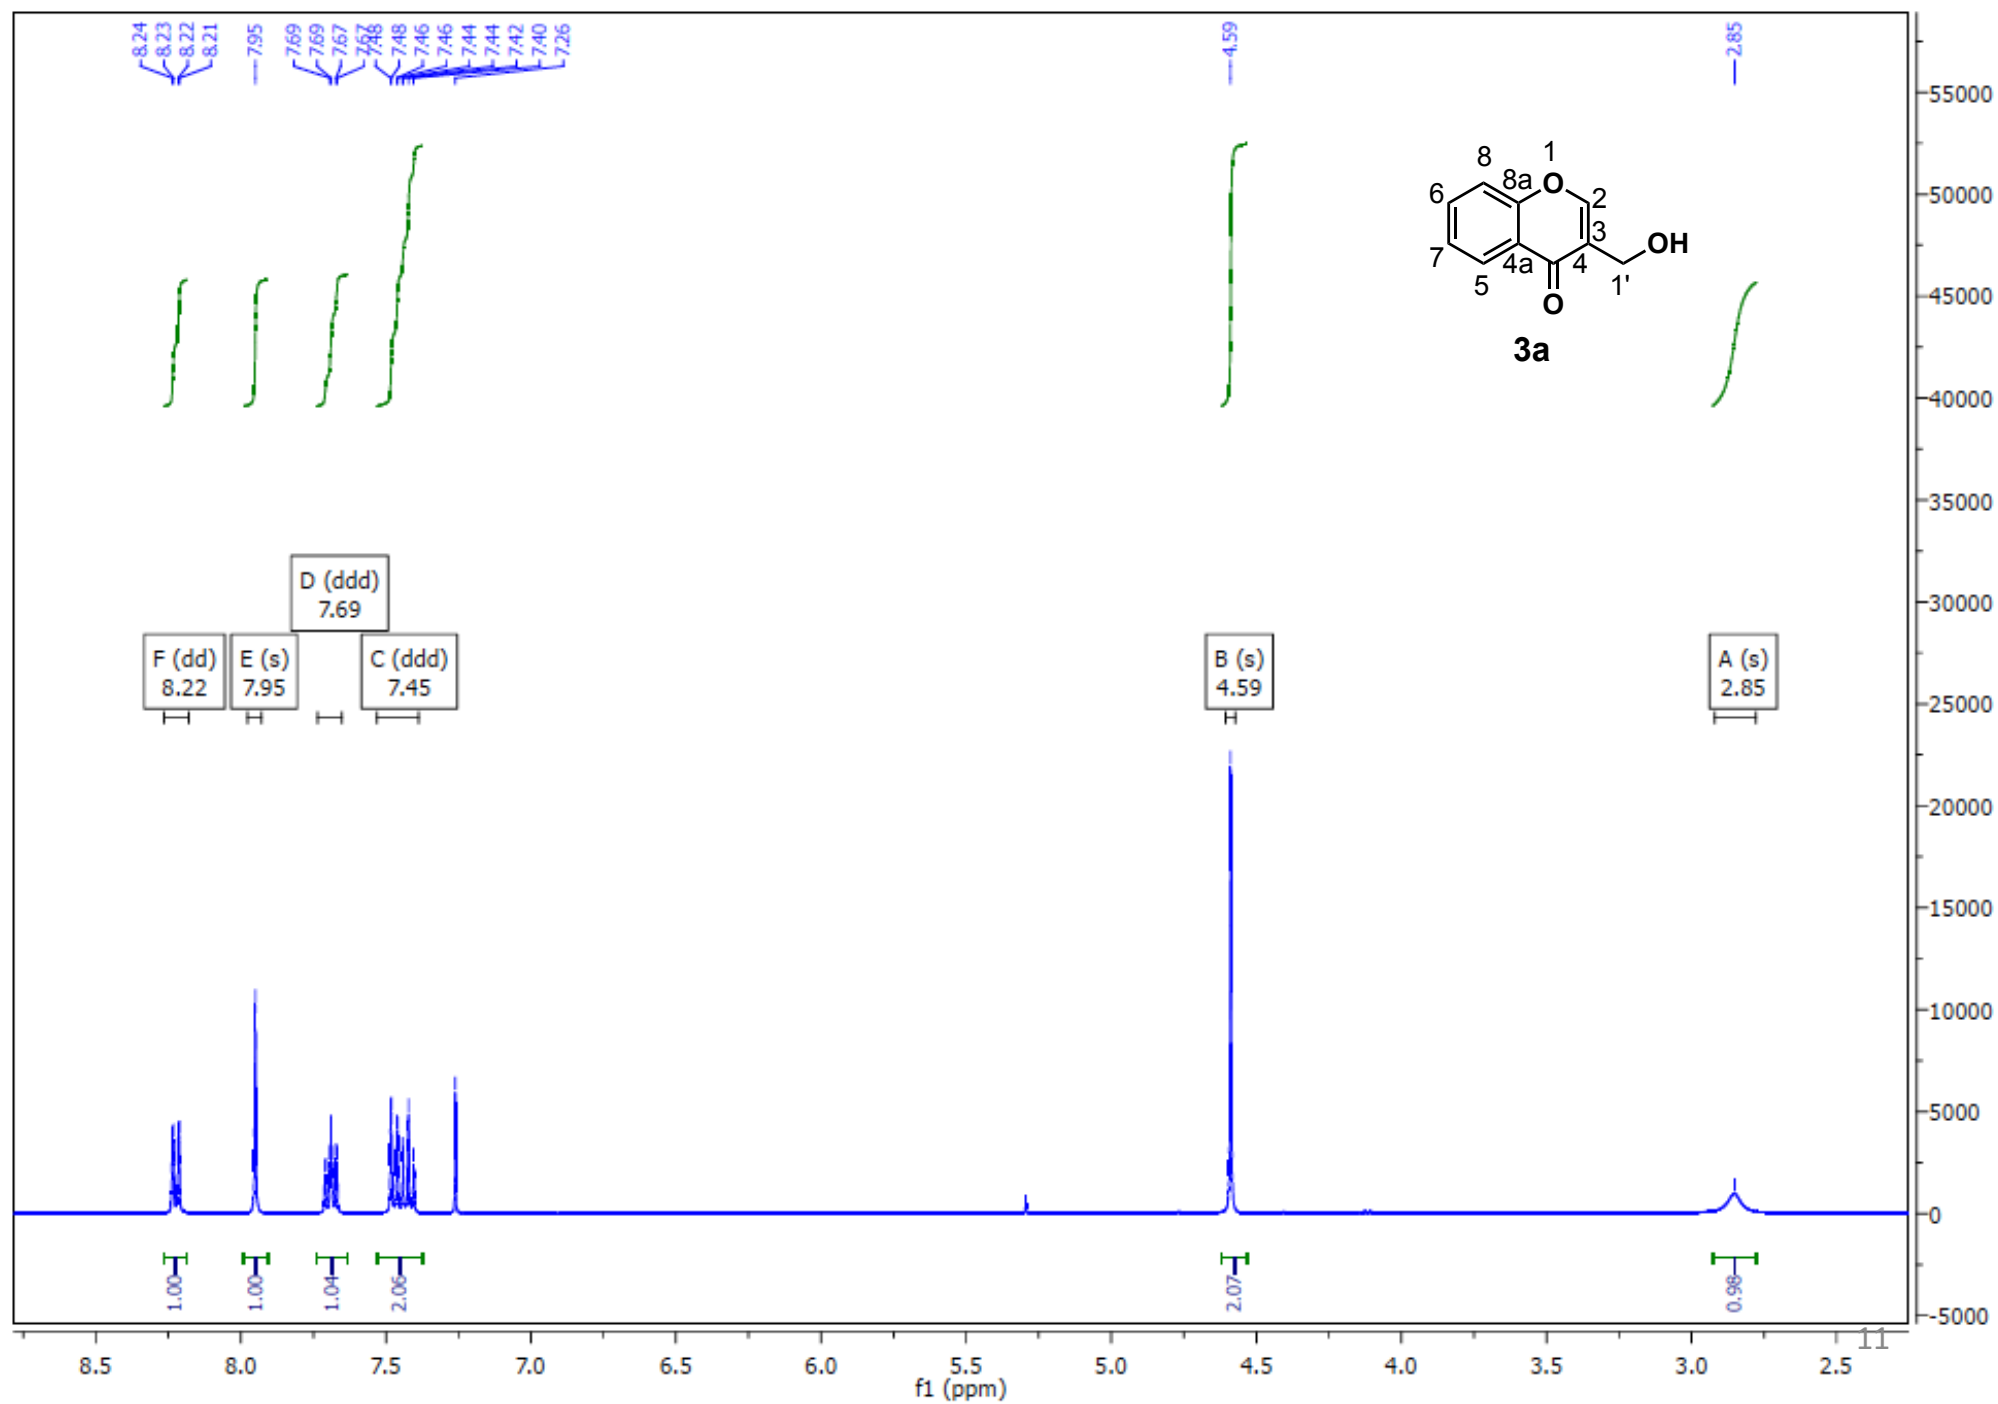

Figure S5.2.  $^{13}\text{C}$  NMR spectra of compound 3a

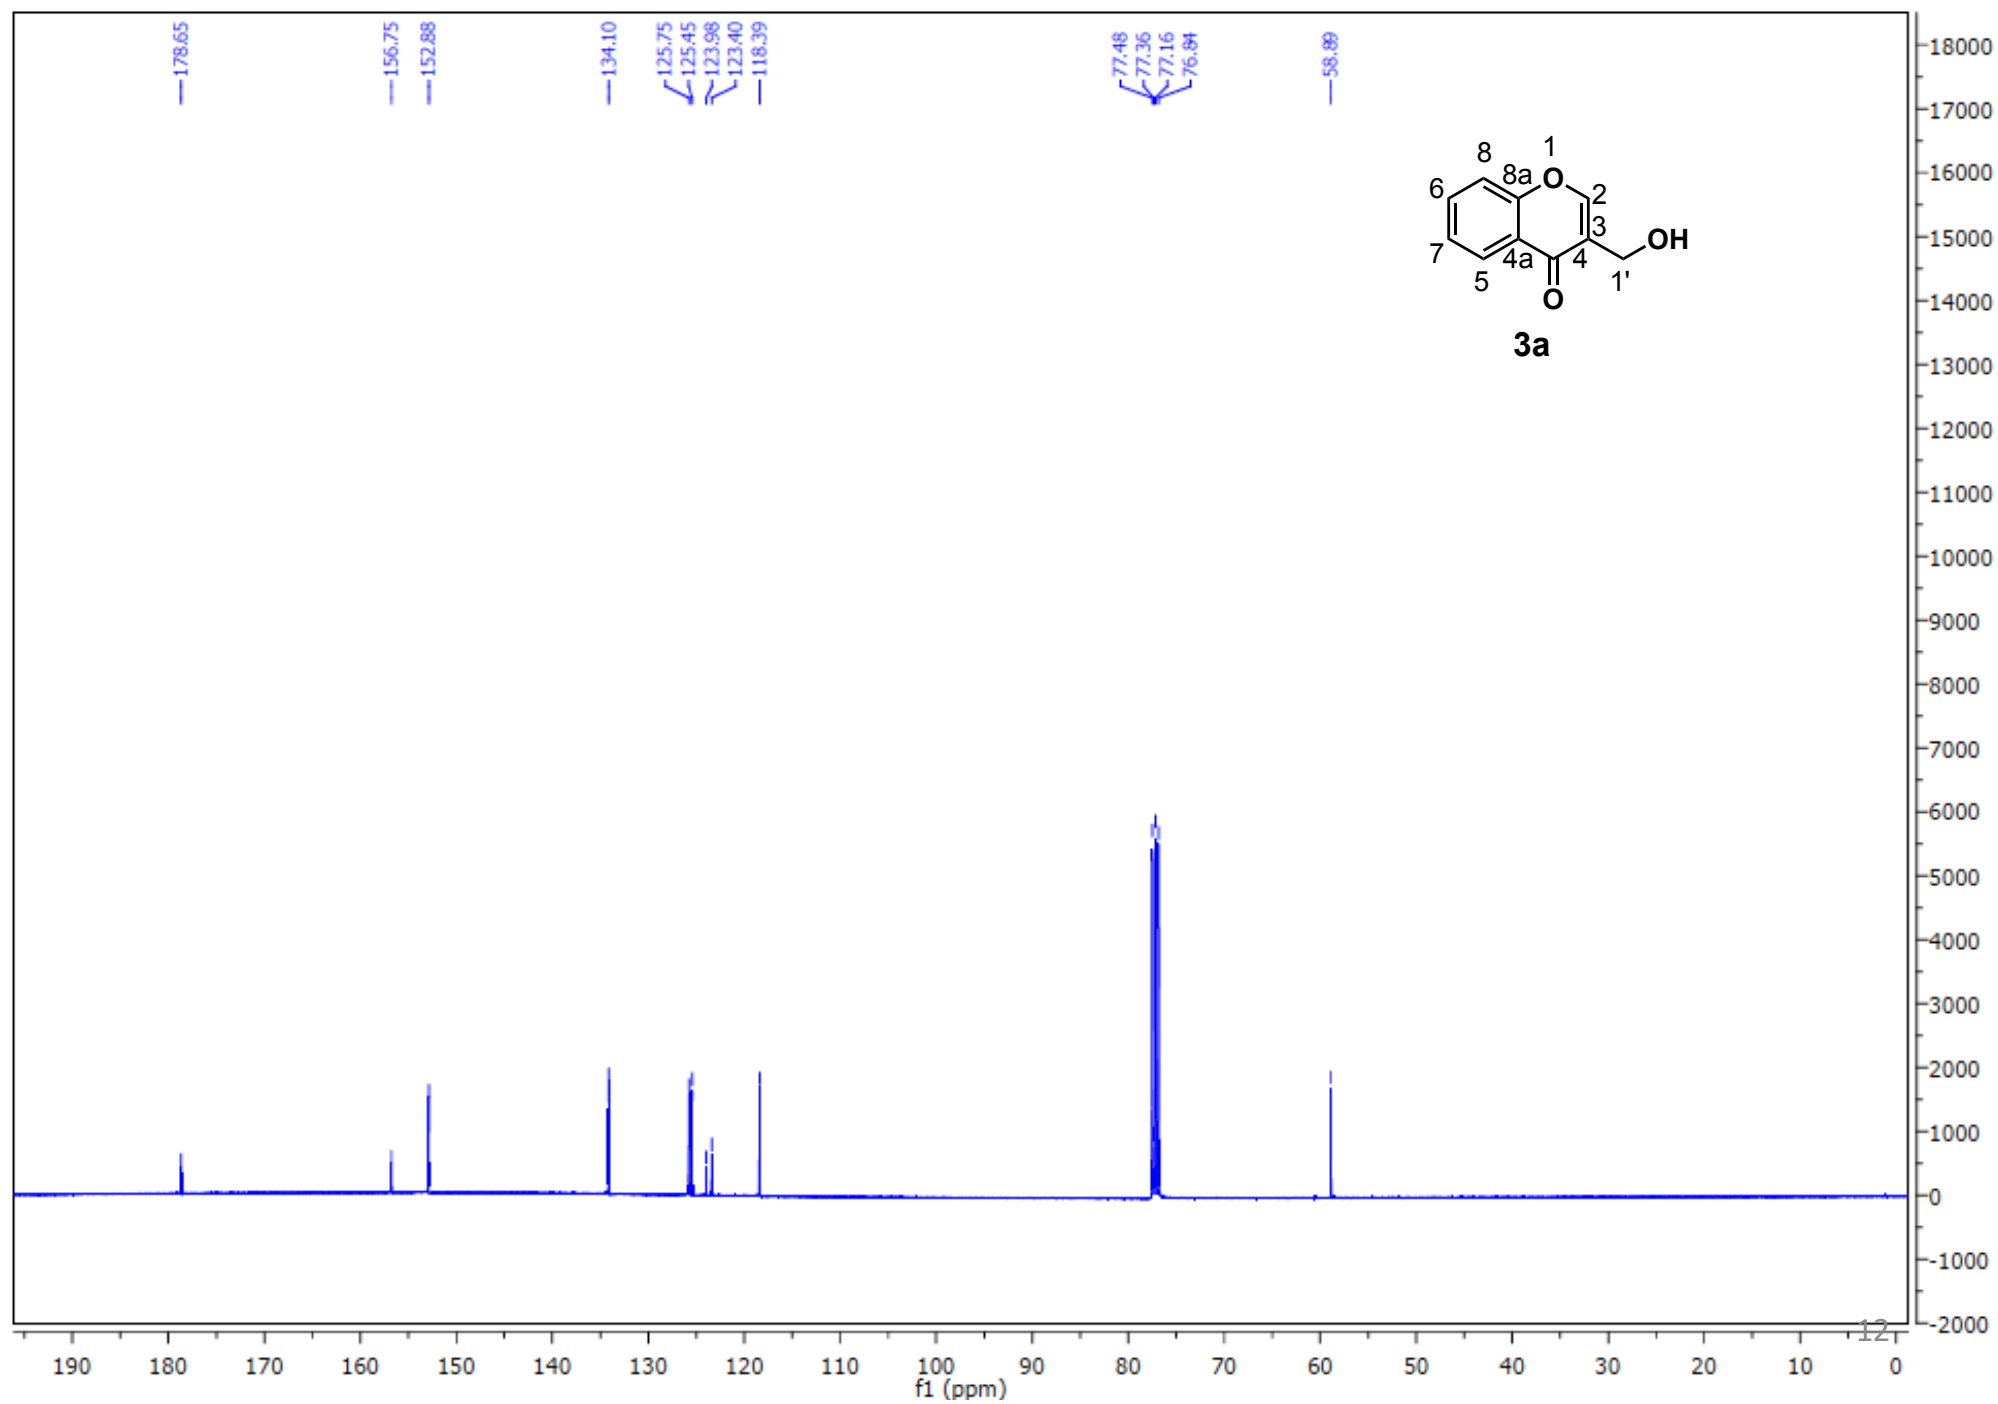

Figure S6.1.  $^1\text{H}$  NMR spectra of compound 3b

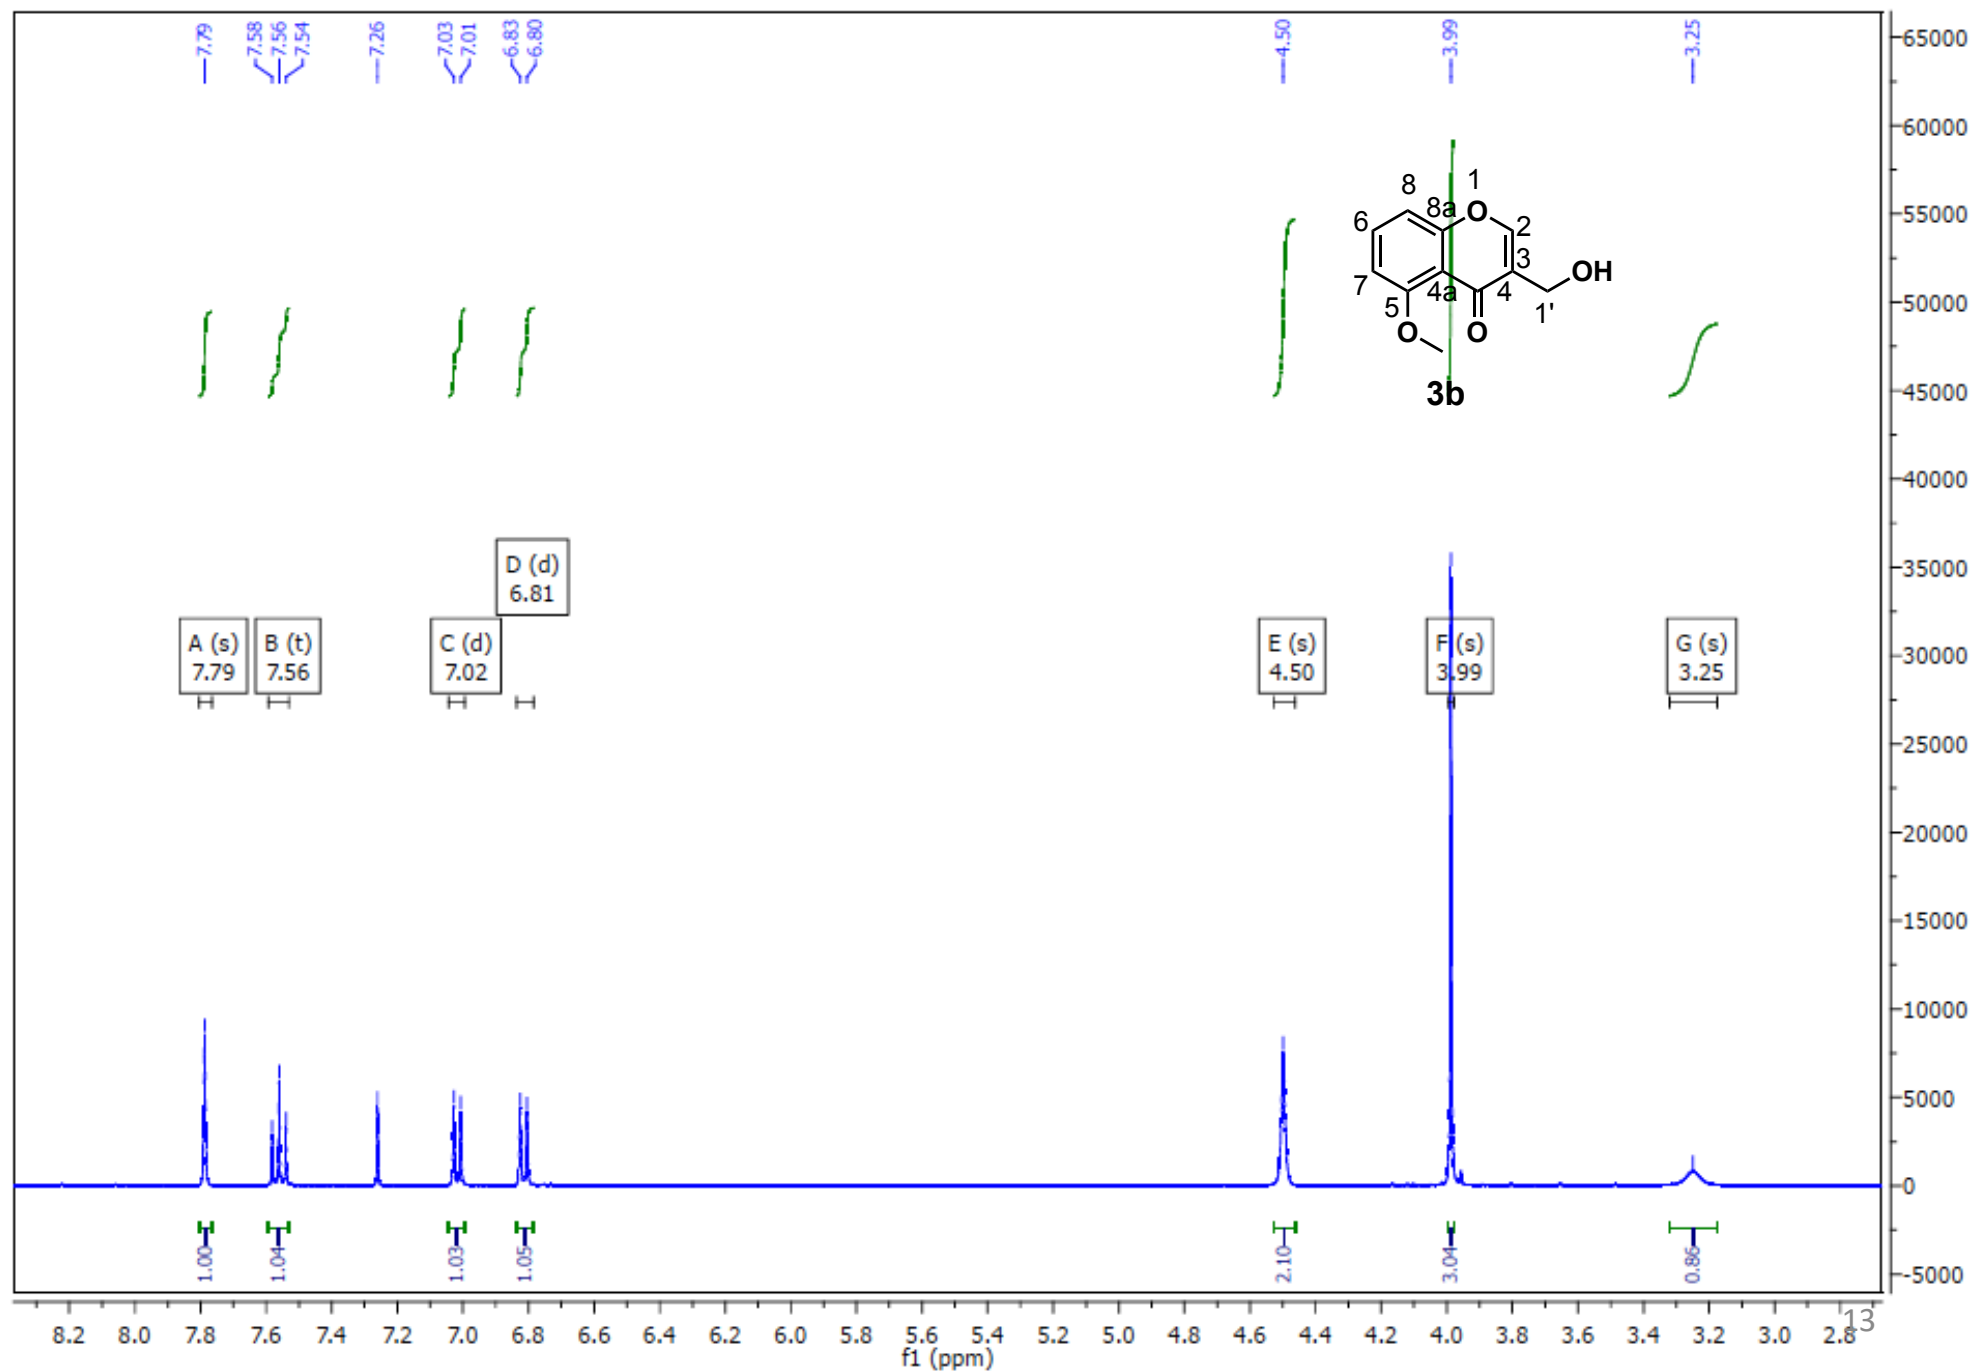

Figure S6.2.  $^{13}\text{C}$  NMR spectra of compound 3b

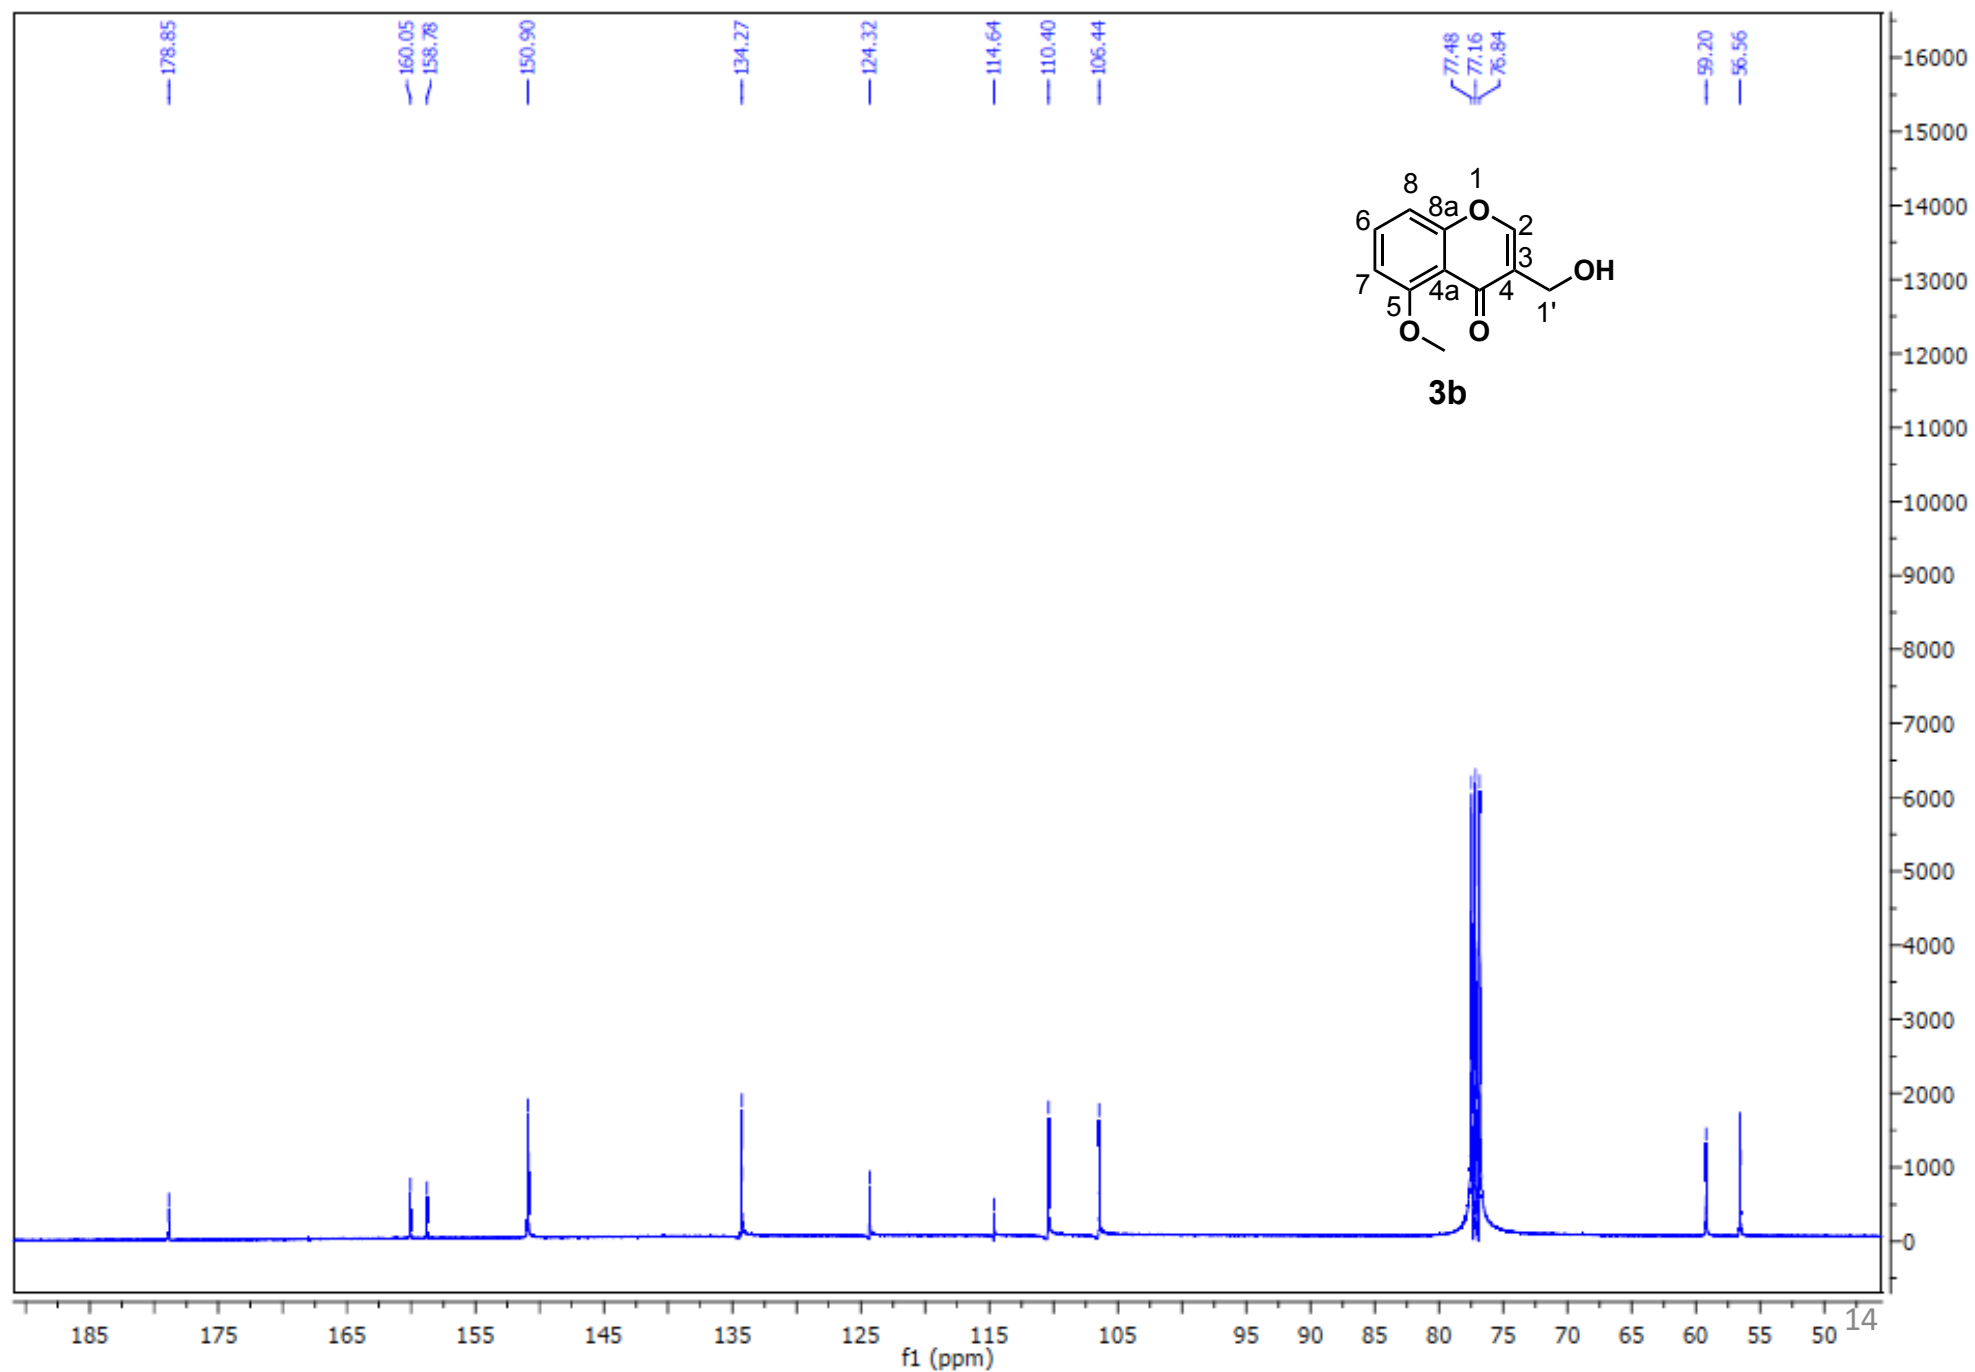

Figure S7.1.  $^1\text{H}$  NMR spectra of compound 3c

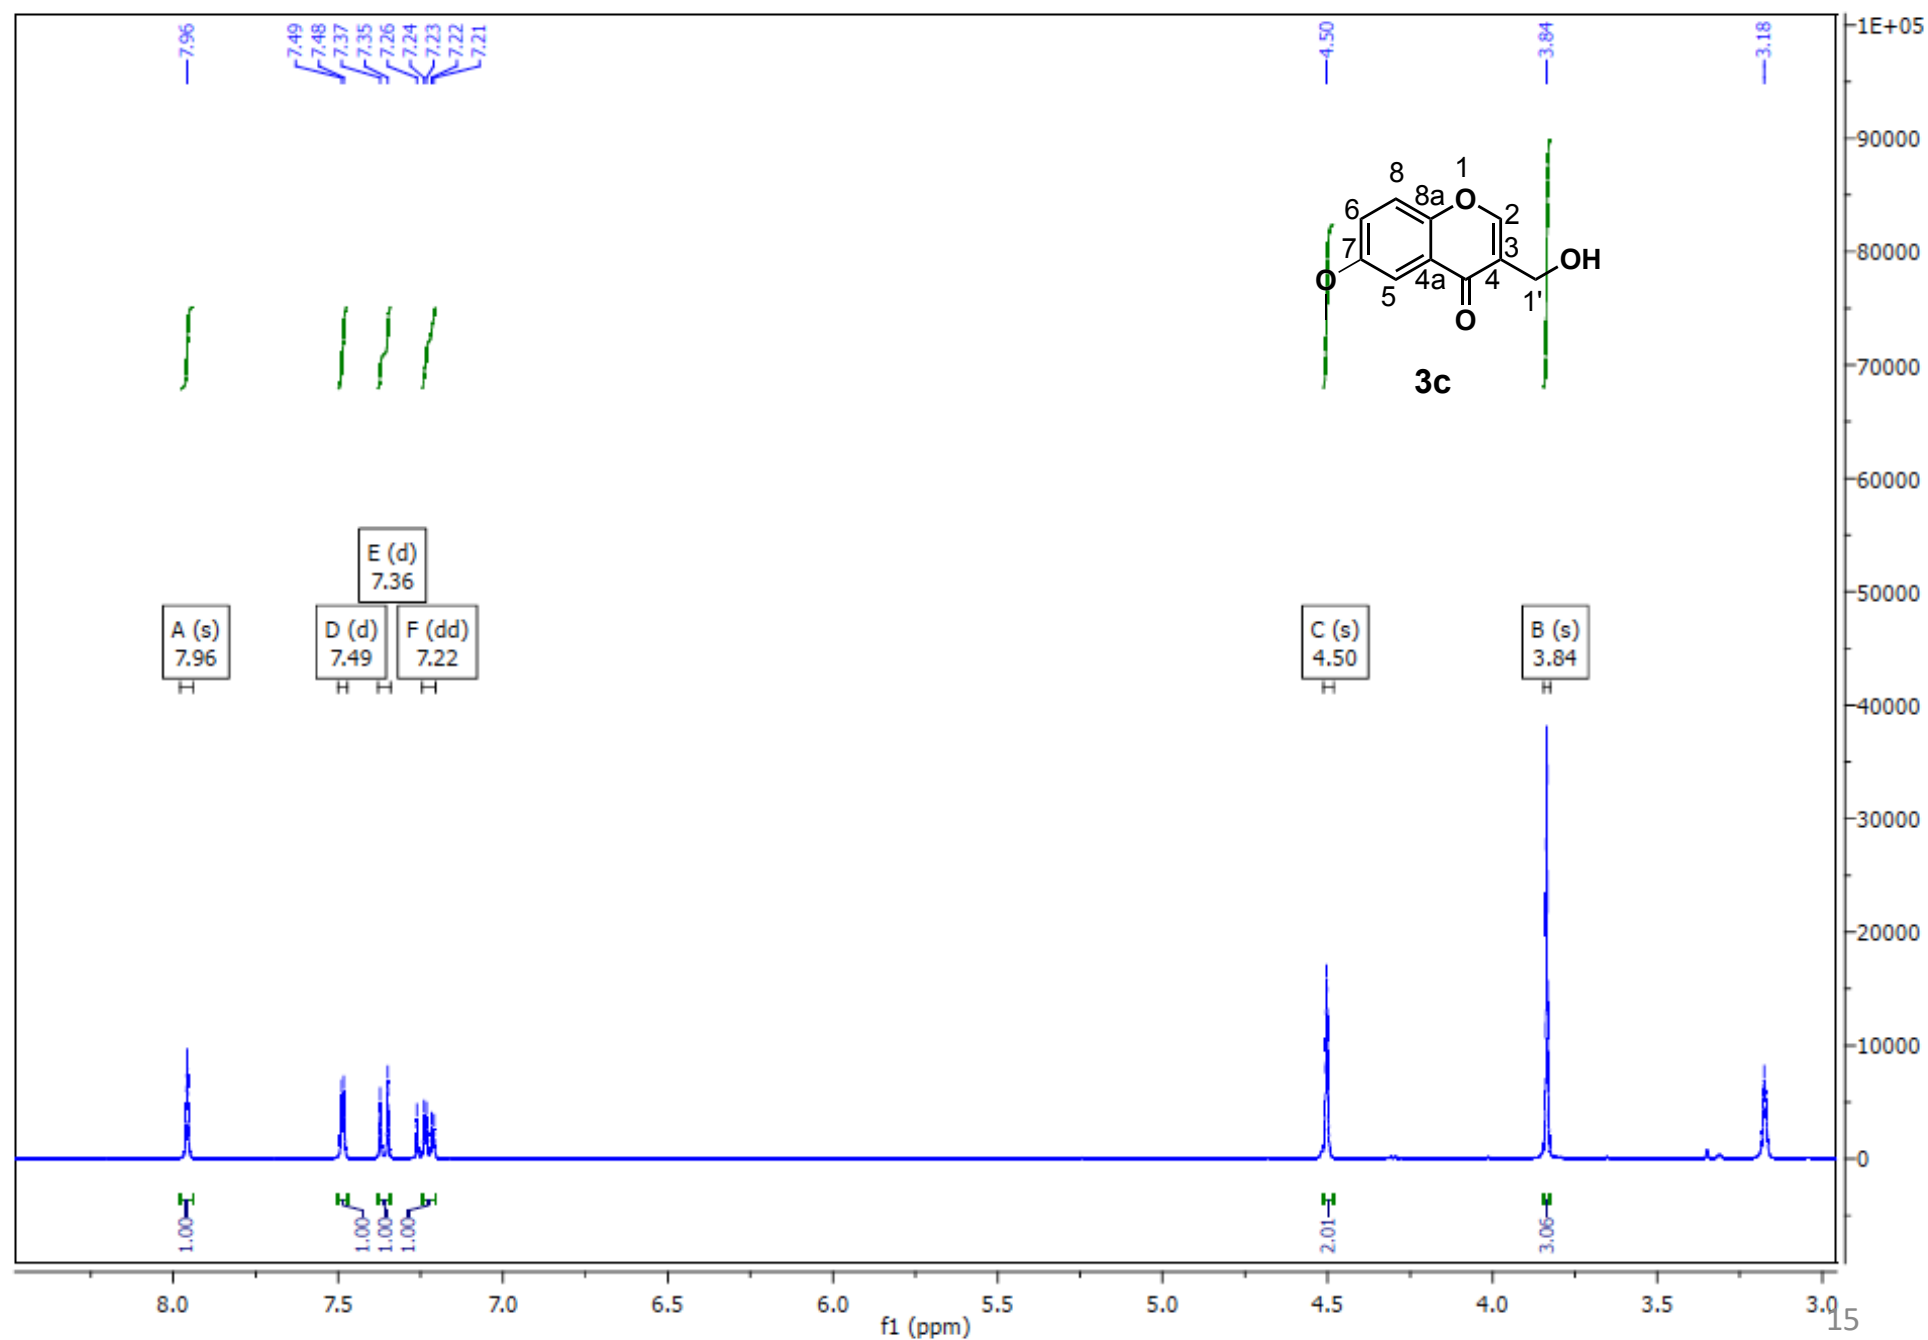

Figure S7.2.  $^1\text{H}$  NMR spectra of compound 3c

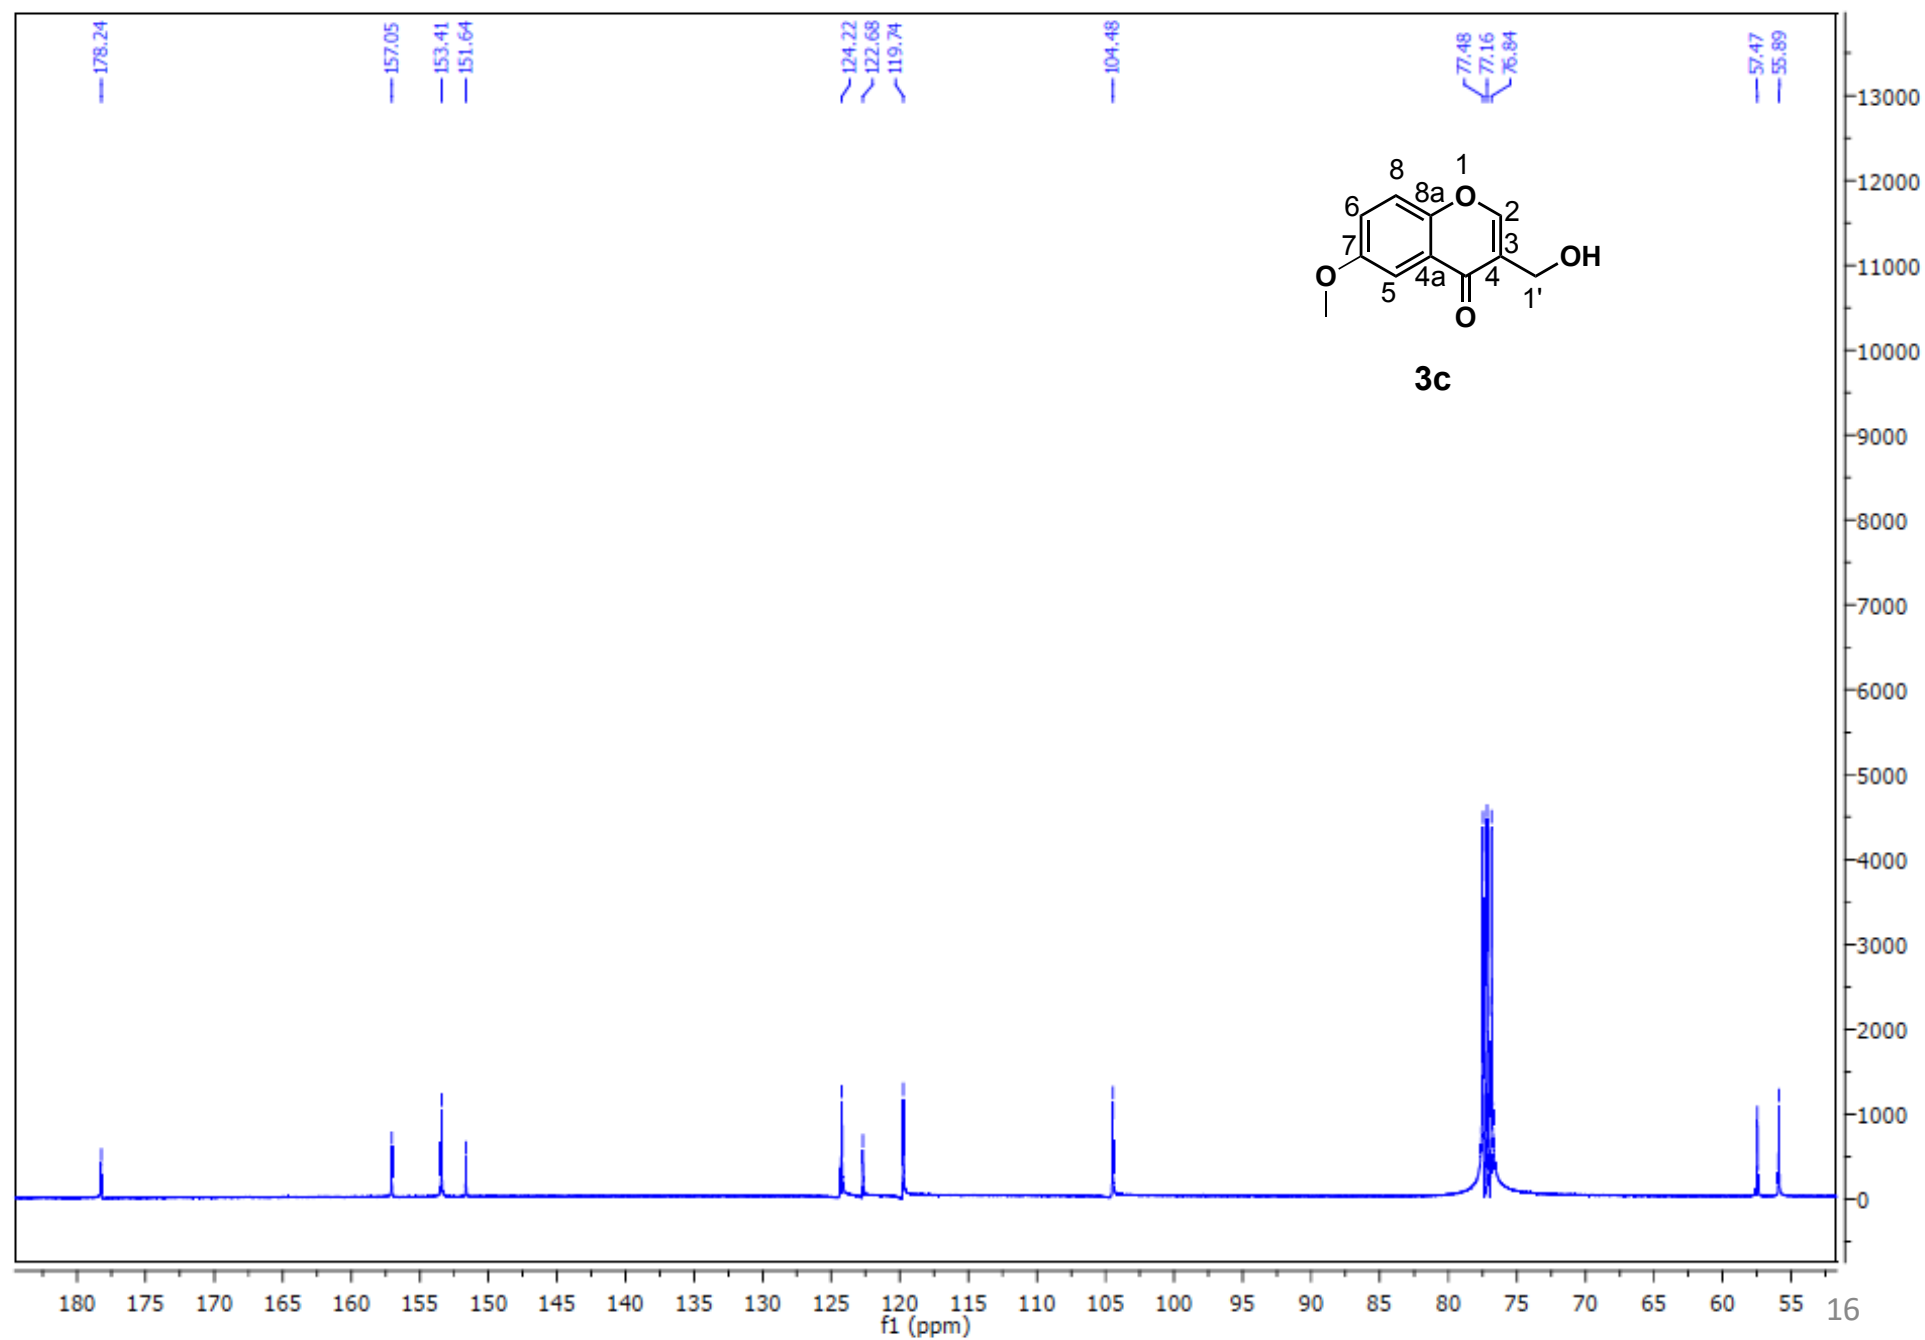



Figure S8.1.  $^1\text{H}$  NMR spectra of compound 3d

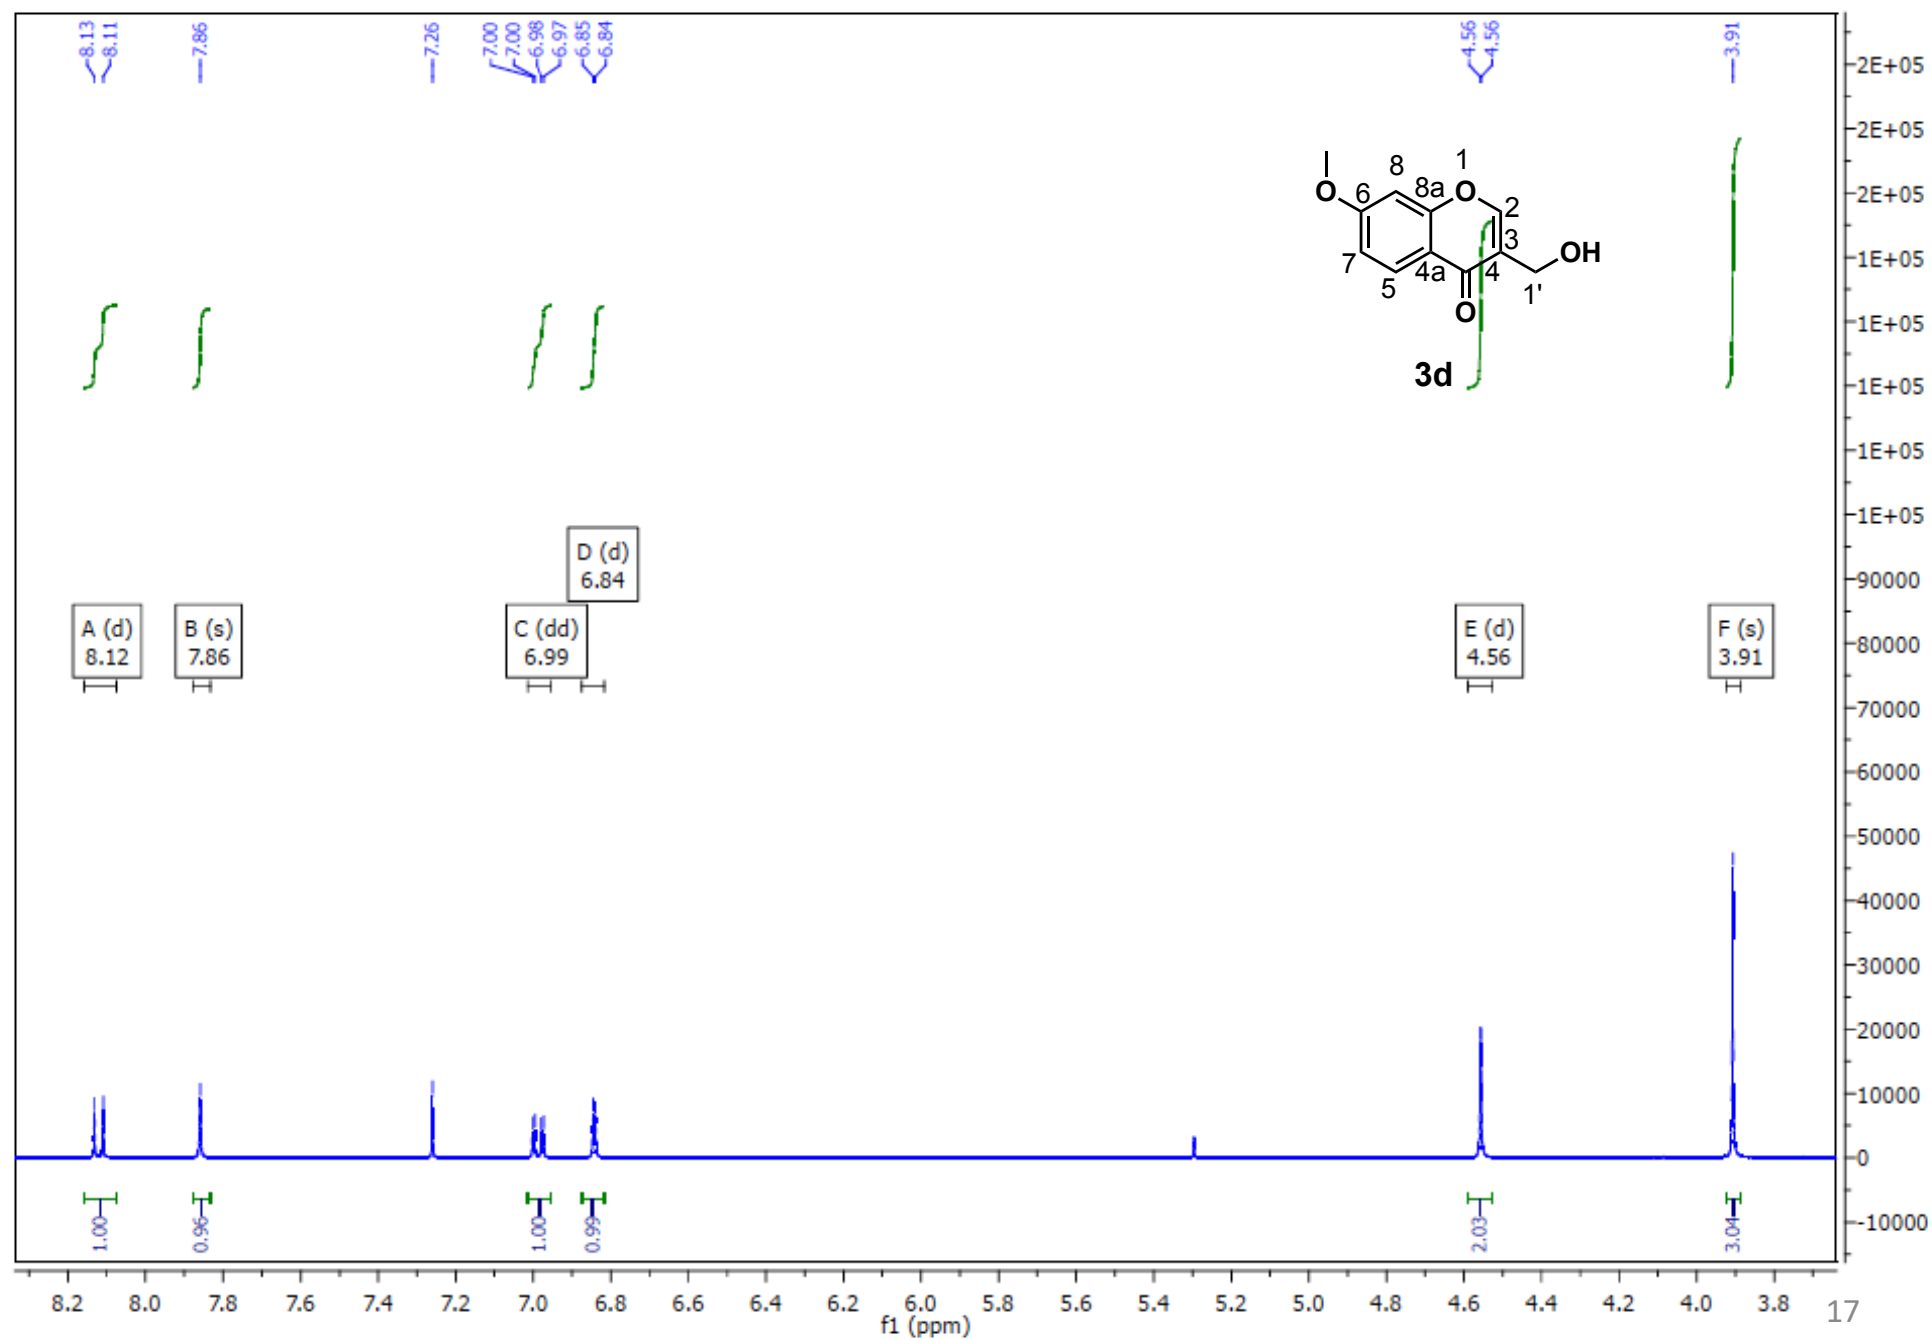

Figure S8.2.  $^{13}\text{C}$  NMR spectra of compound 3d

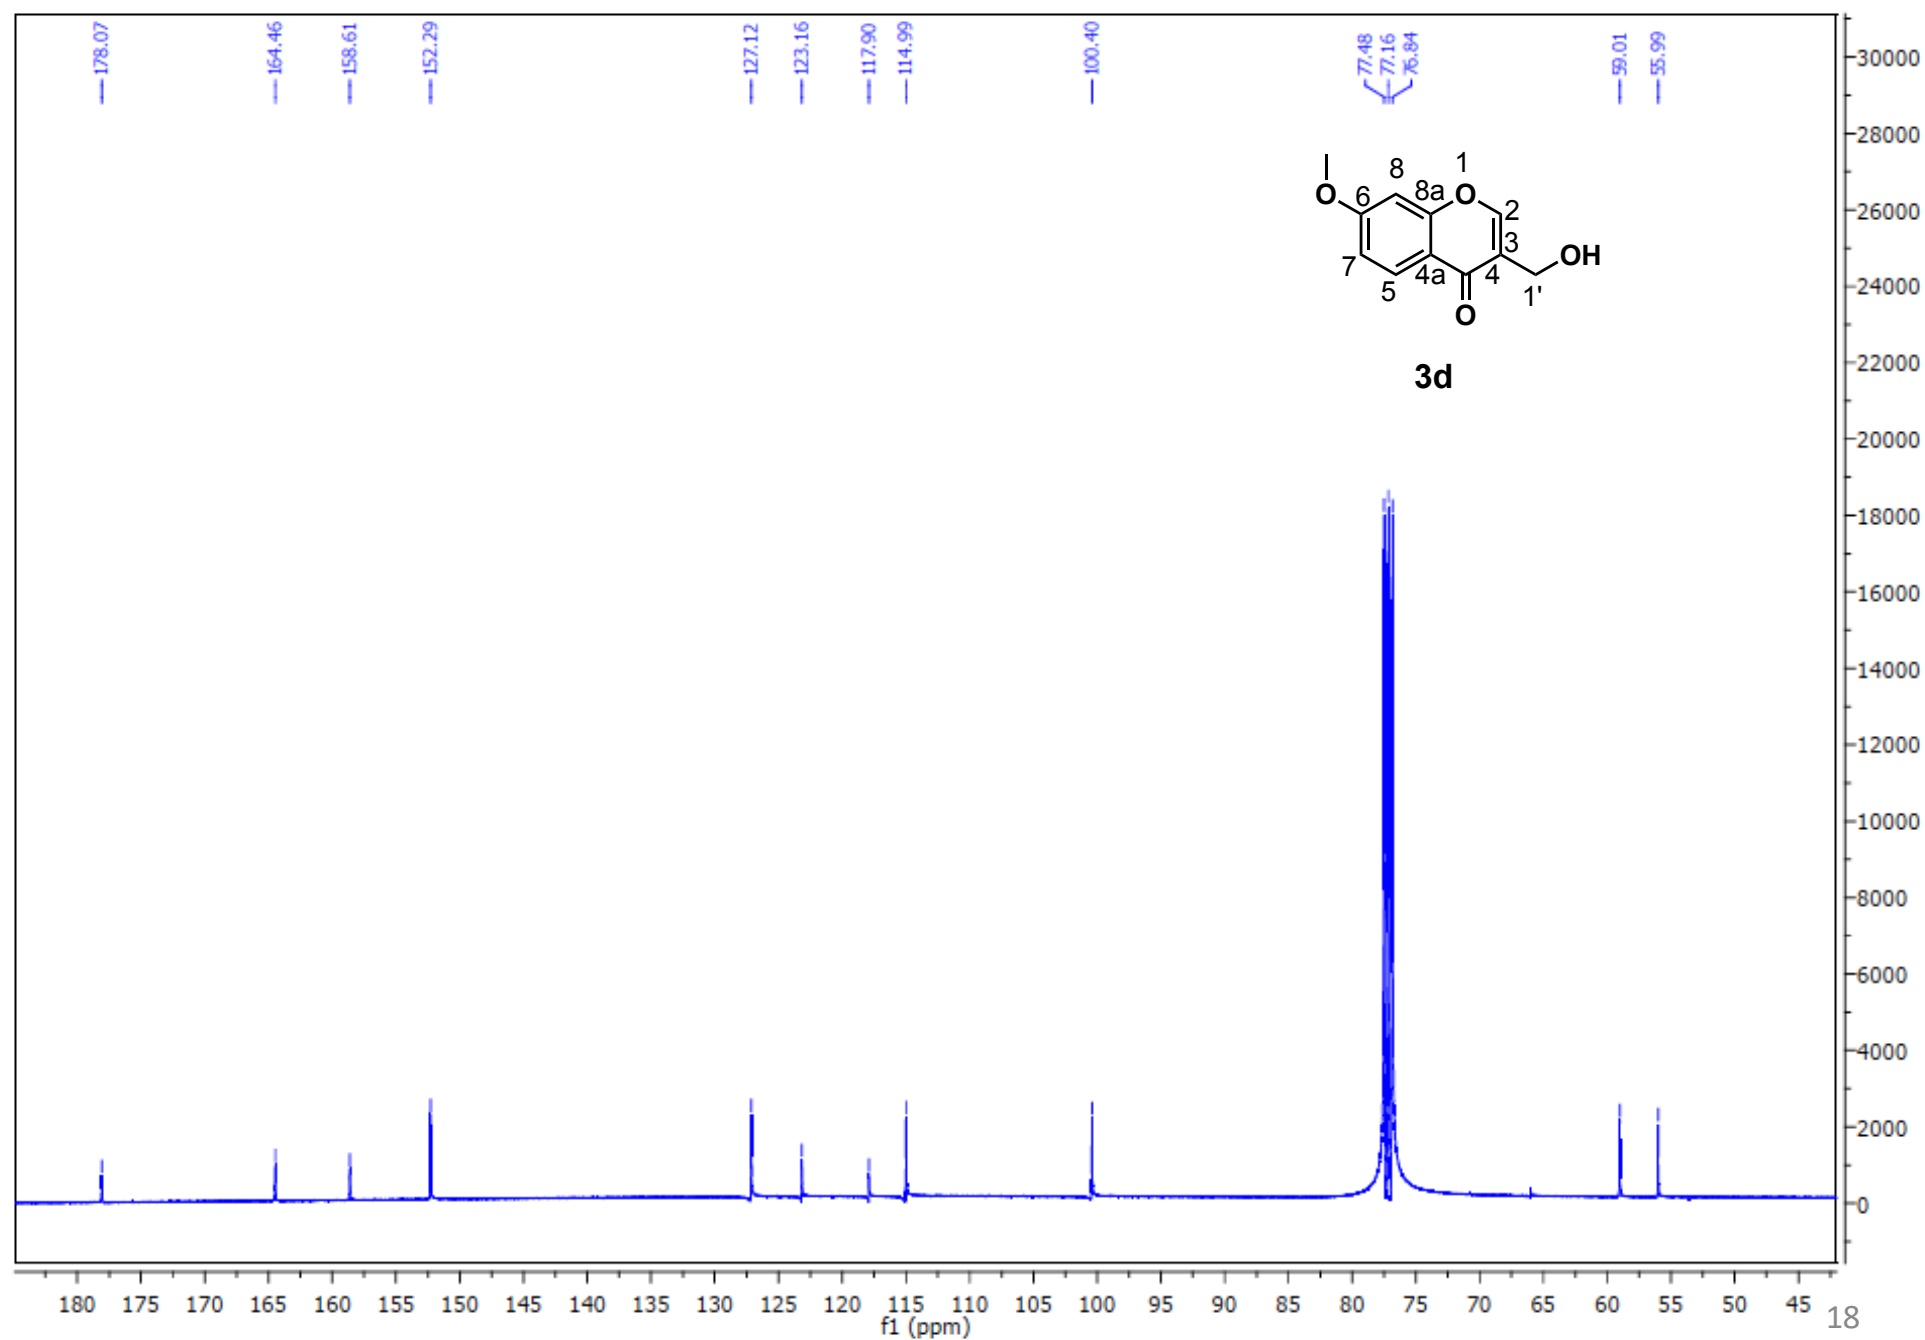

Figure S9.1.  $^1\text{H}$  NMR spectra of compound 4a

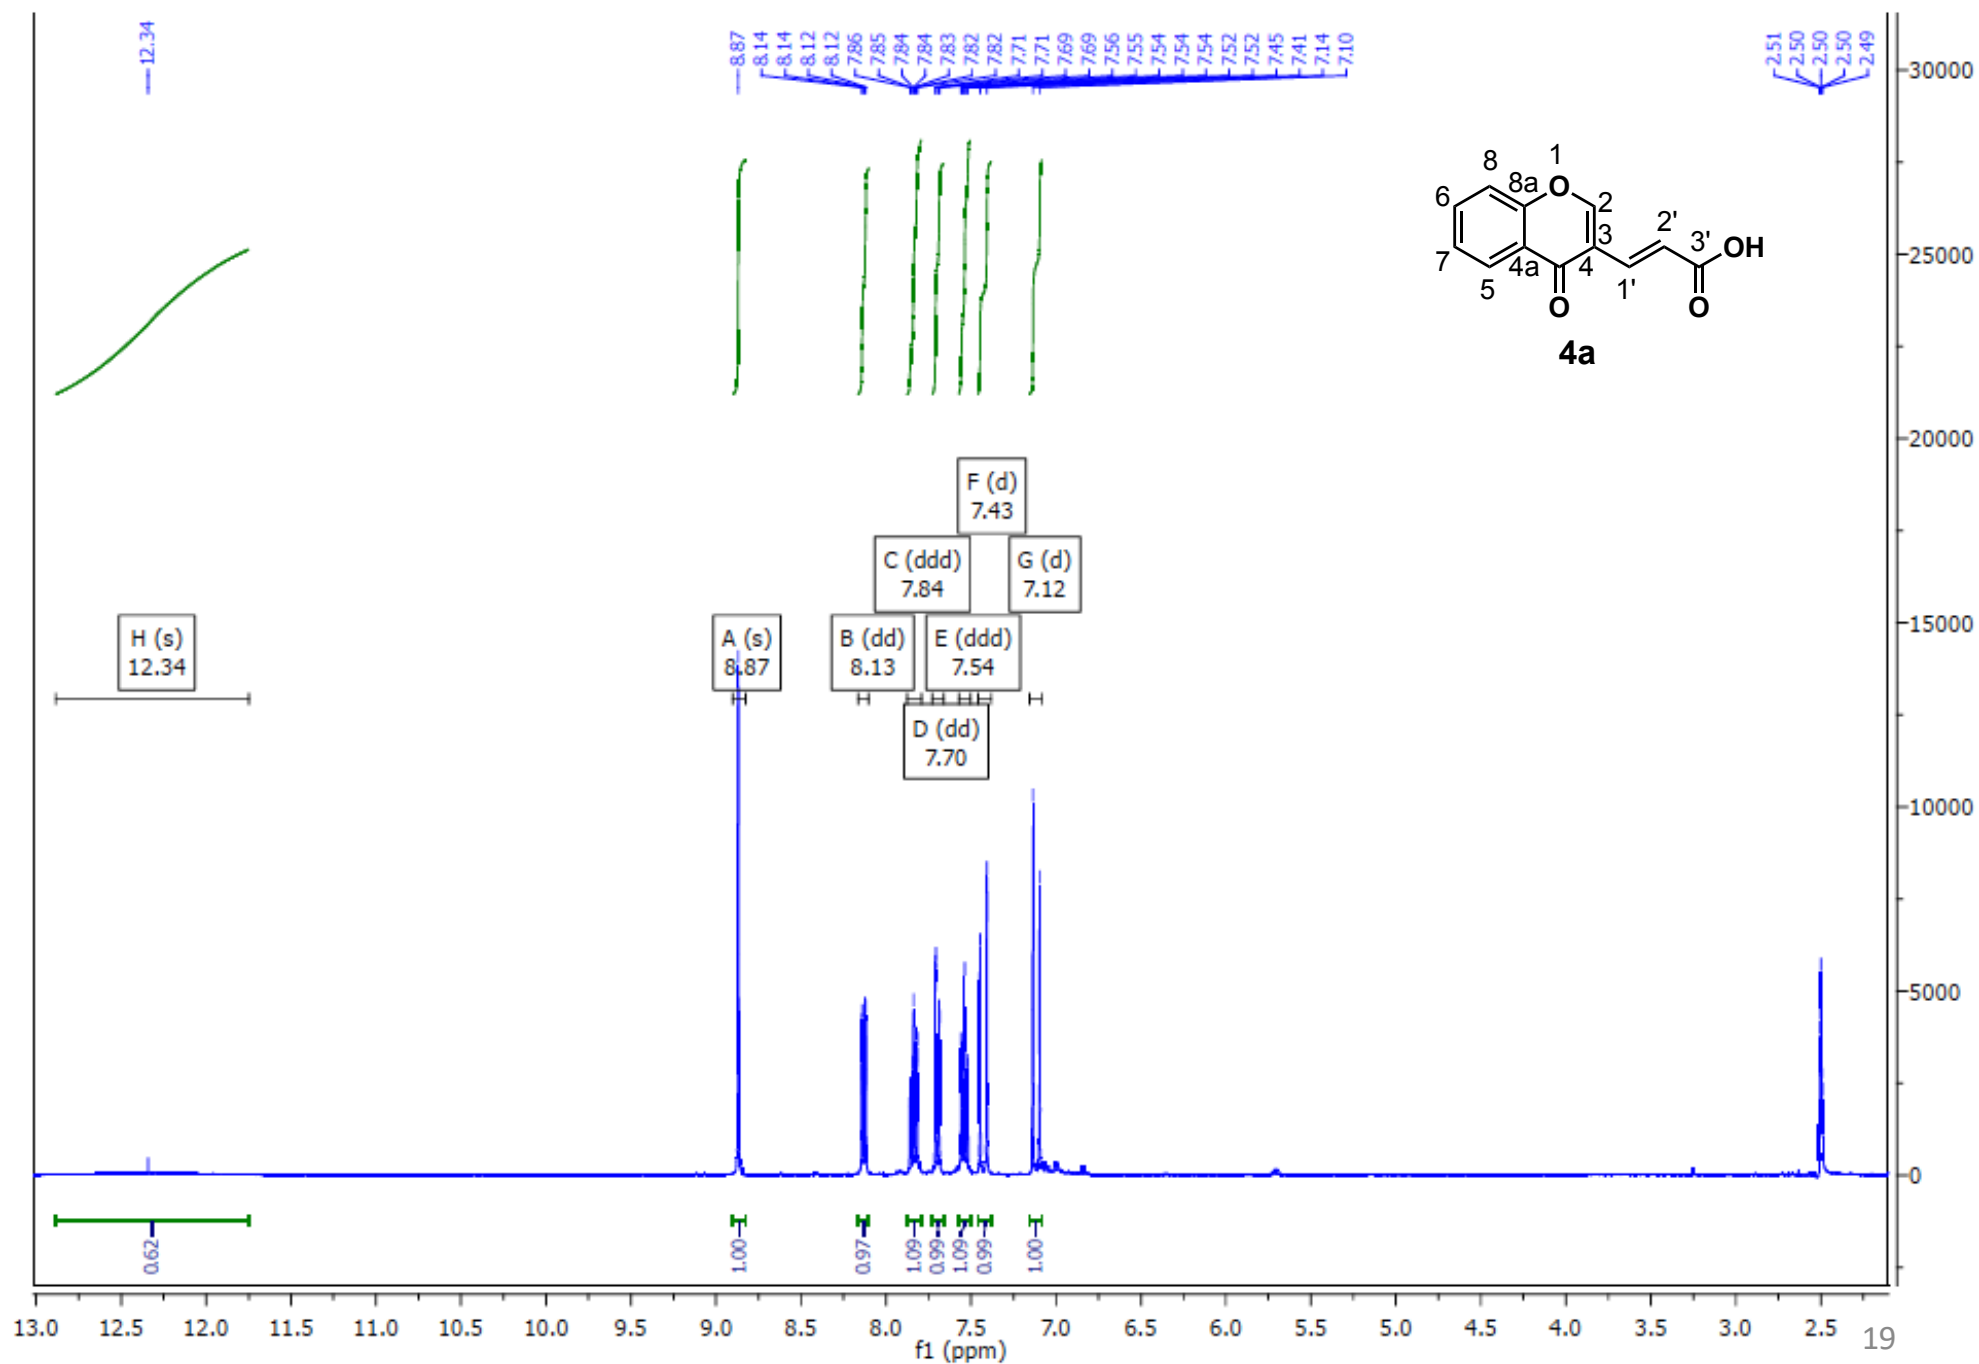

Figure S9.2.  $^{13}\text{C}$  NMR spectra of compound 4a

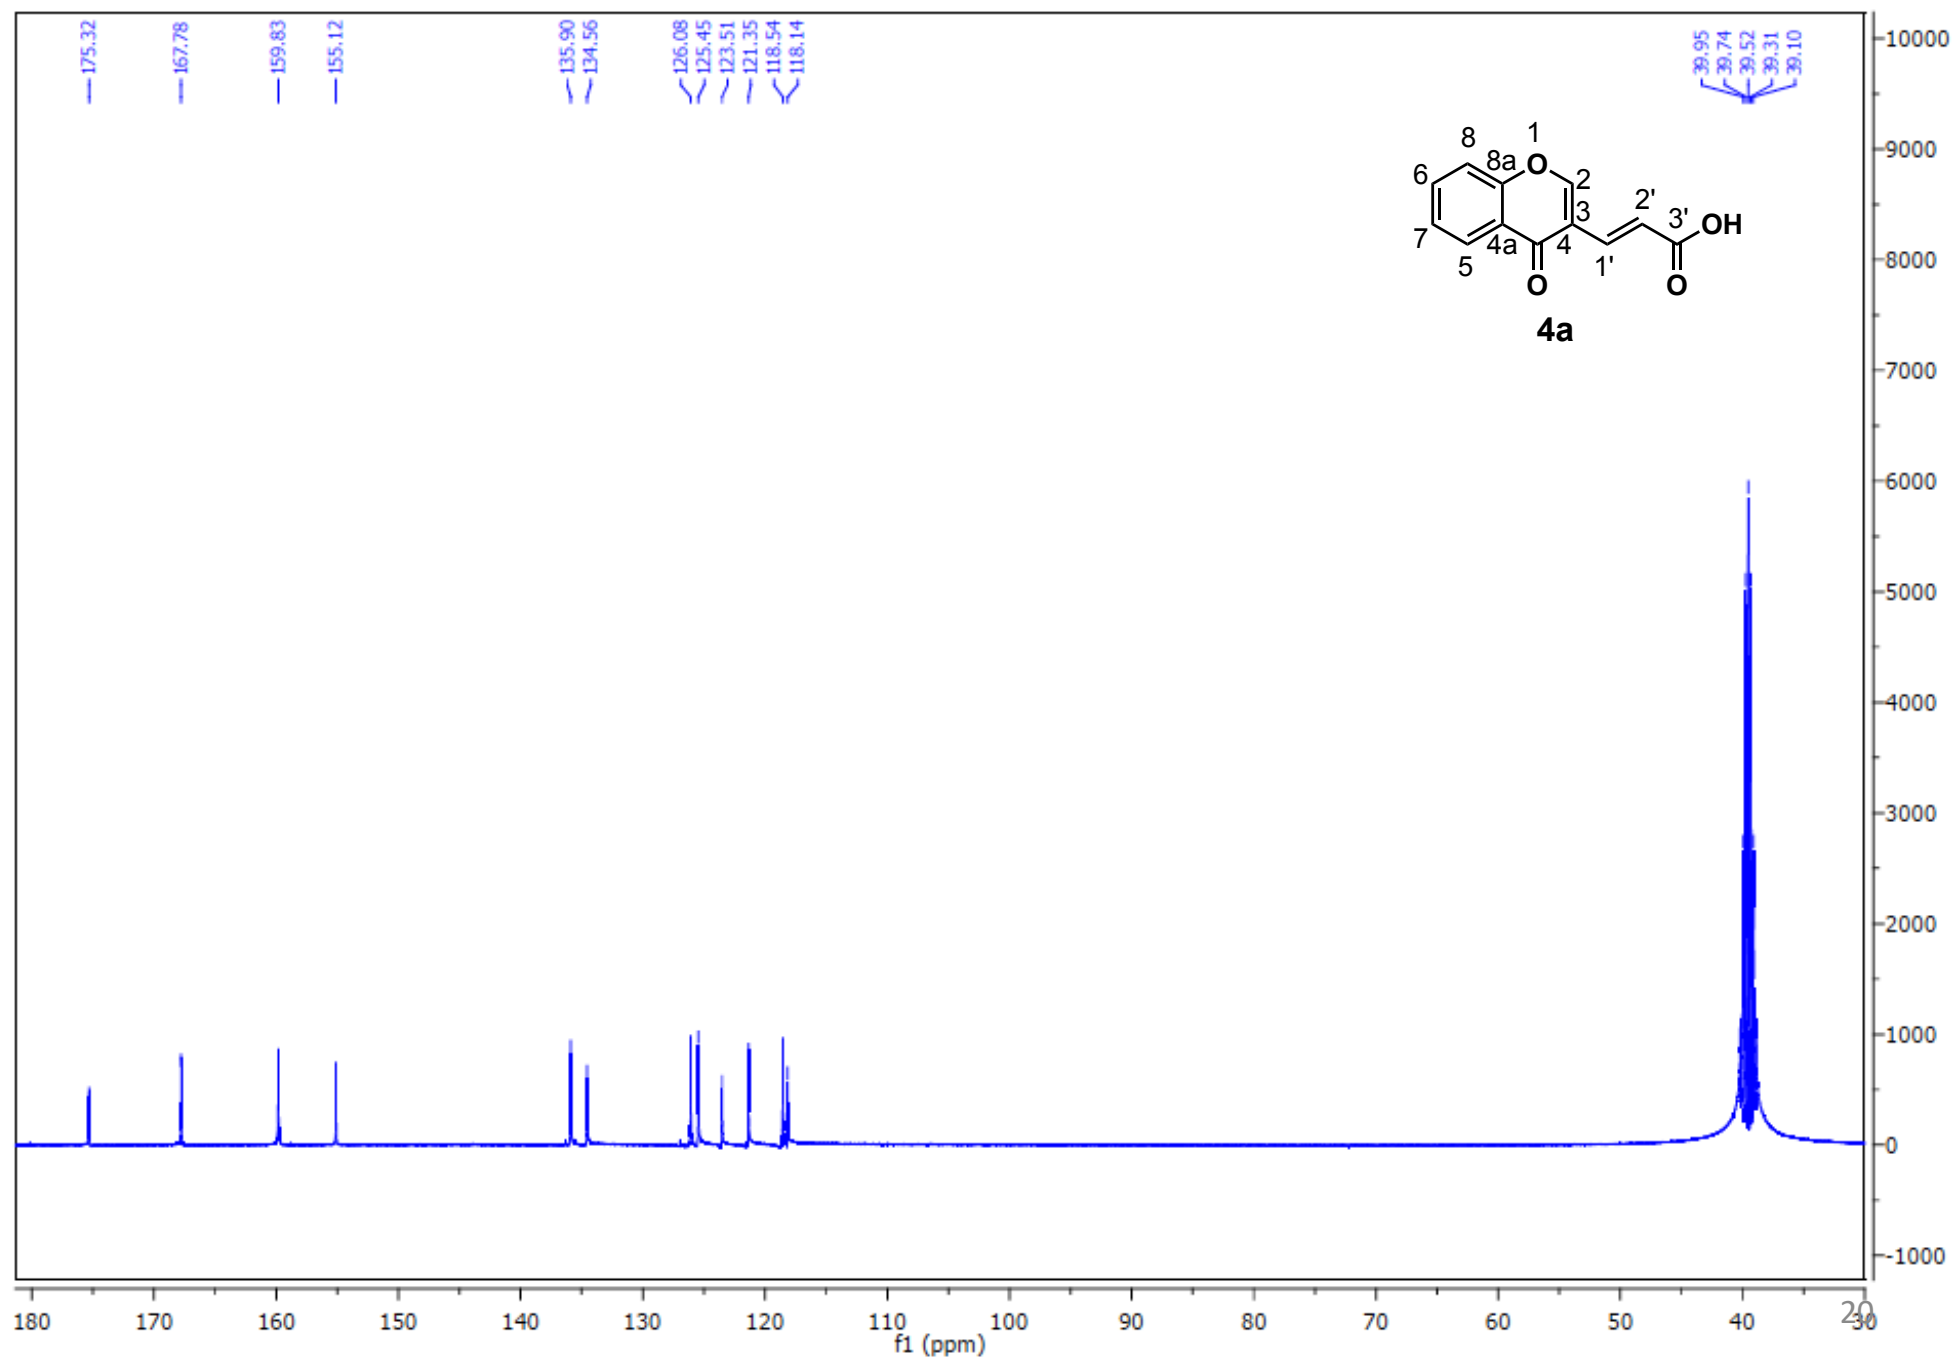

Figure S10.1.  $^1\text{H}$  NMR spectra of compound 4b

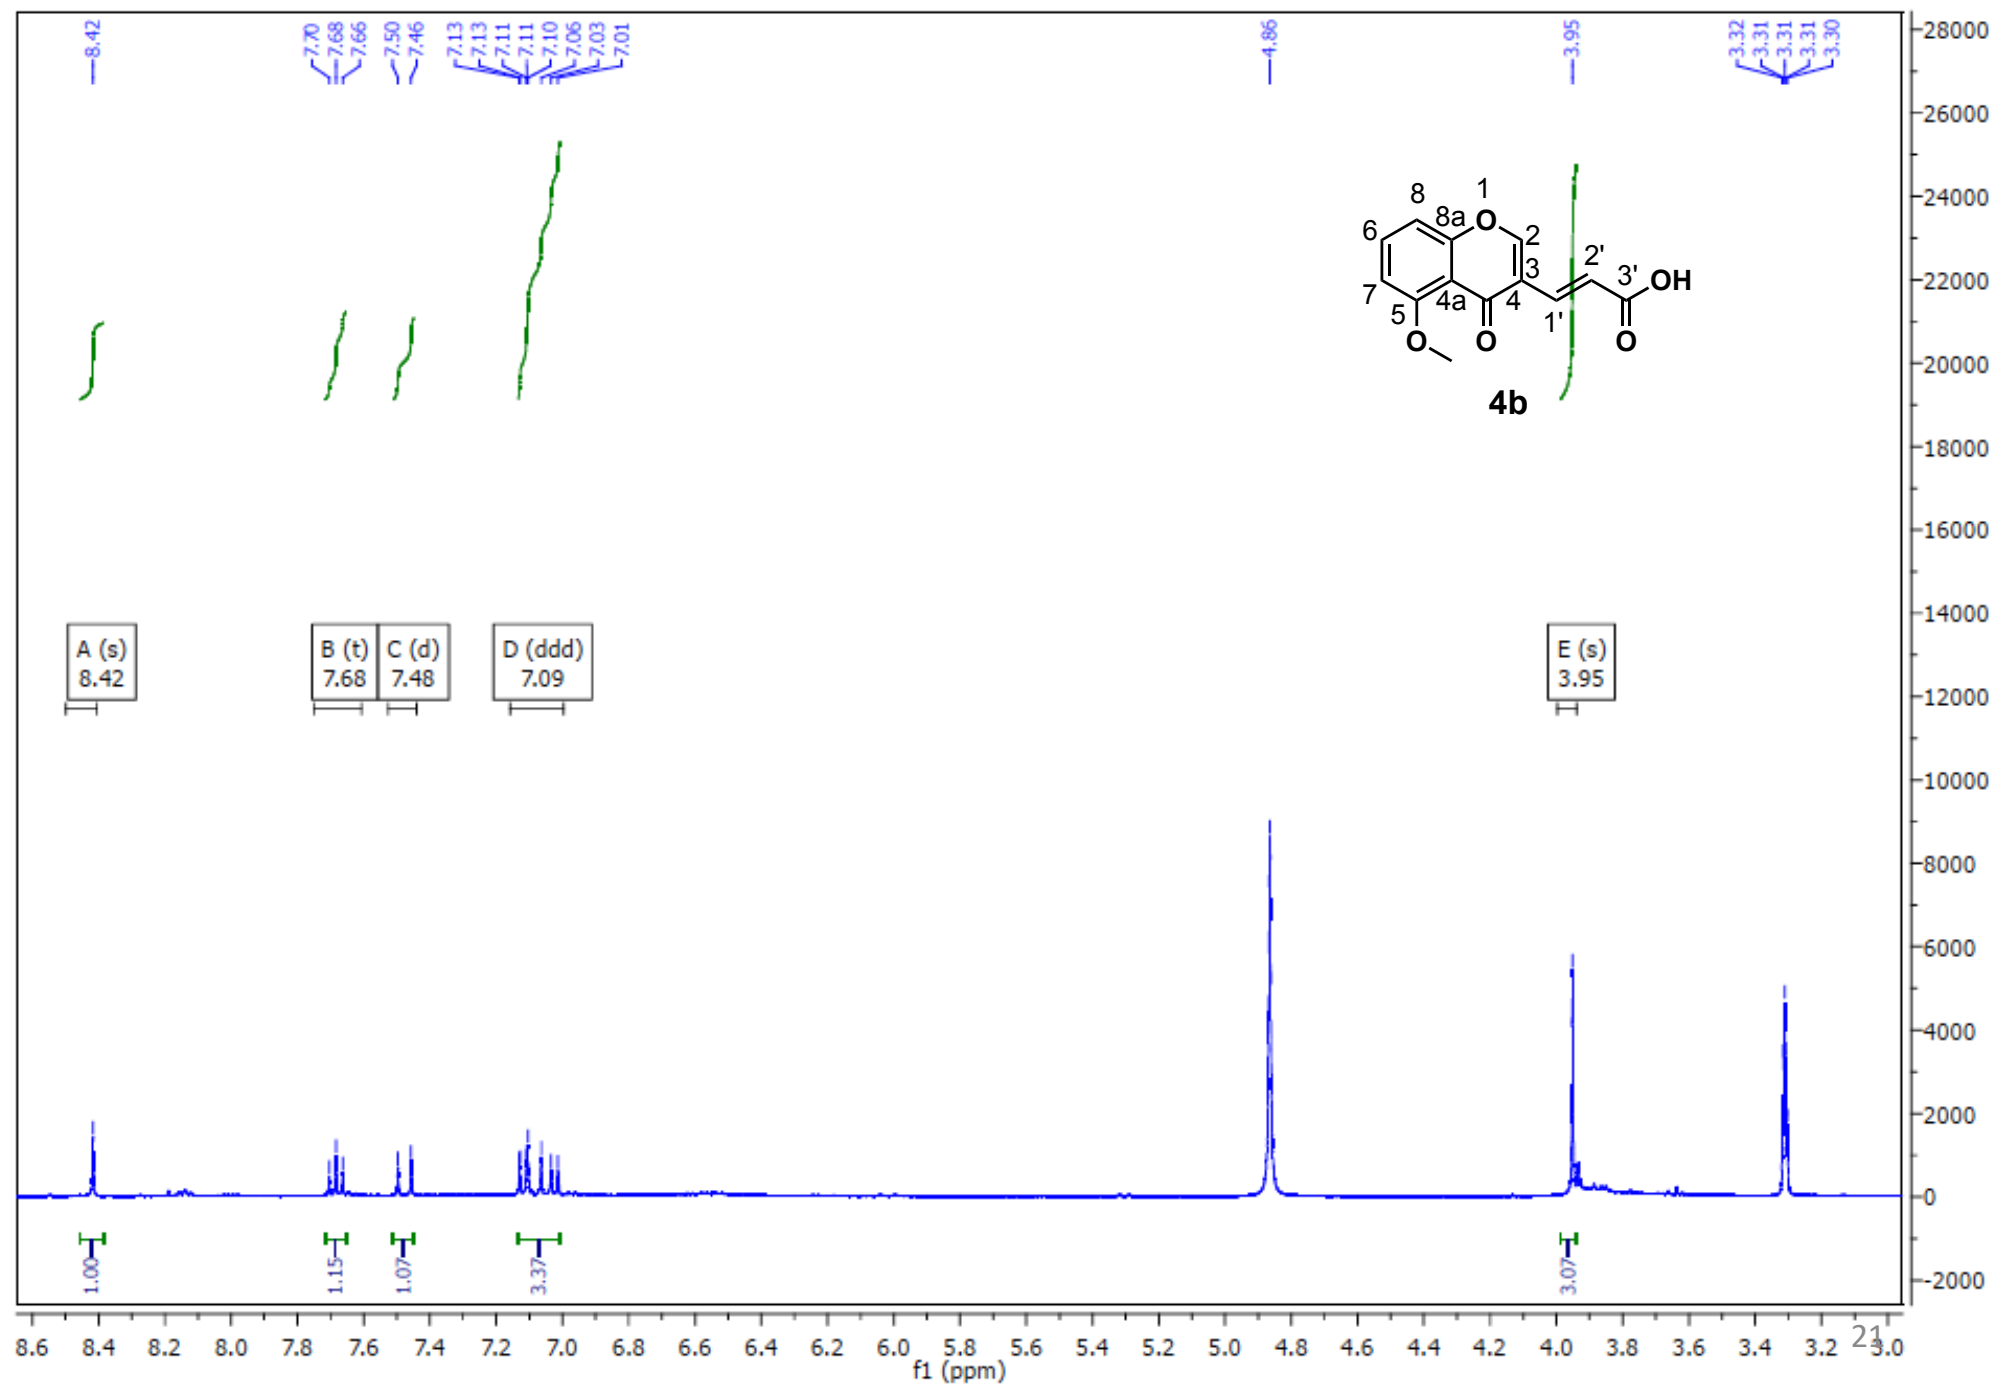

Figure S10.2.  $^{13}\text{C}$  NMR spectra of compound 4b

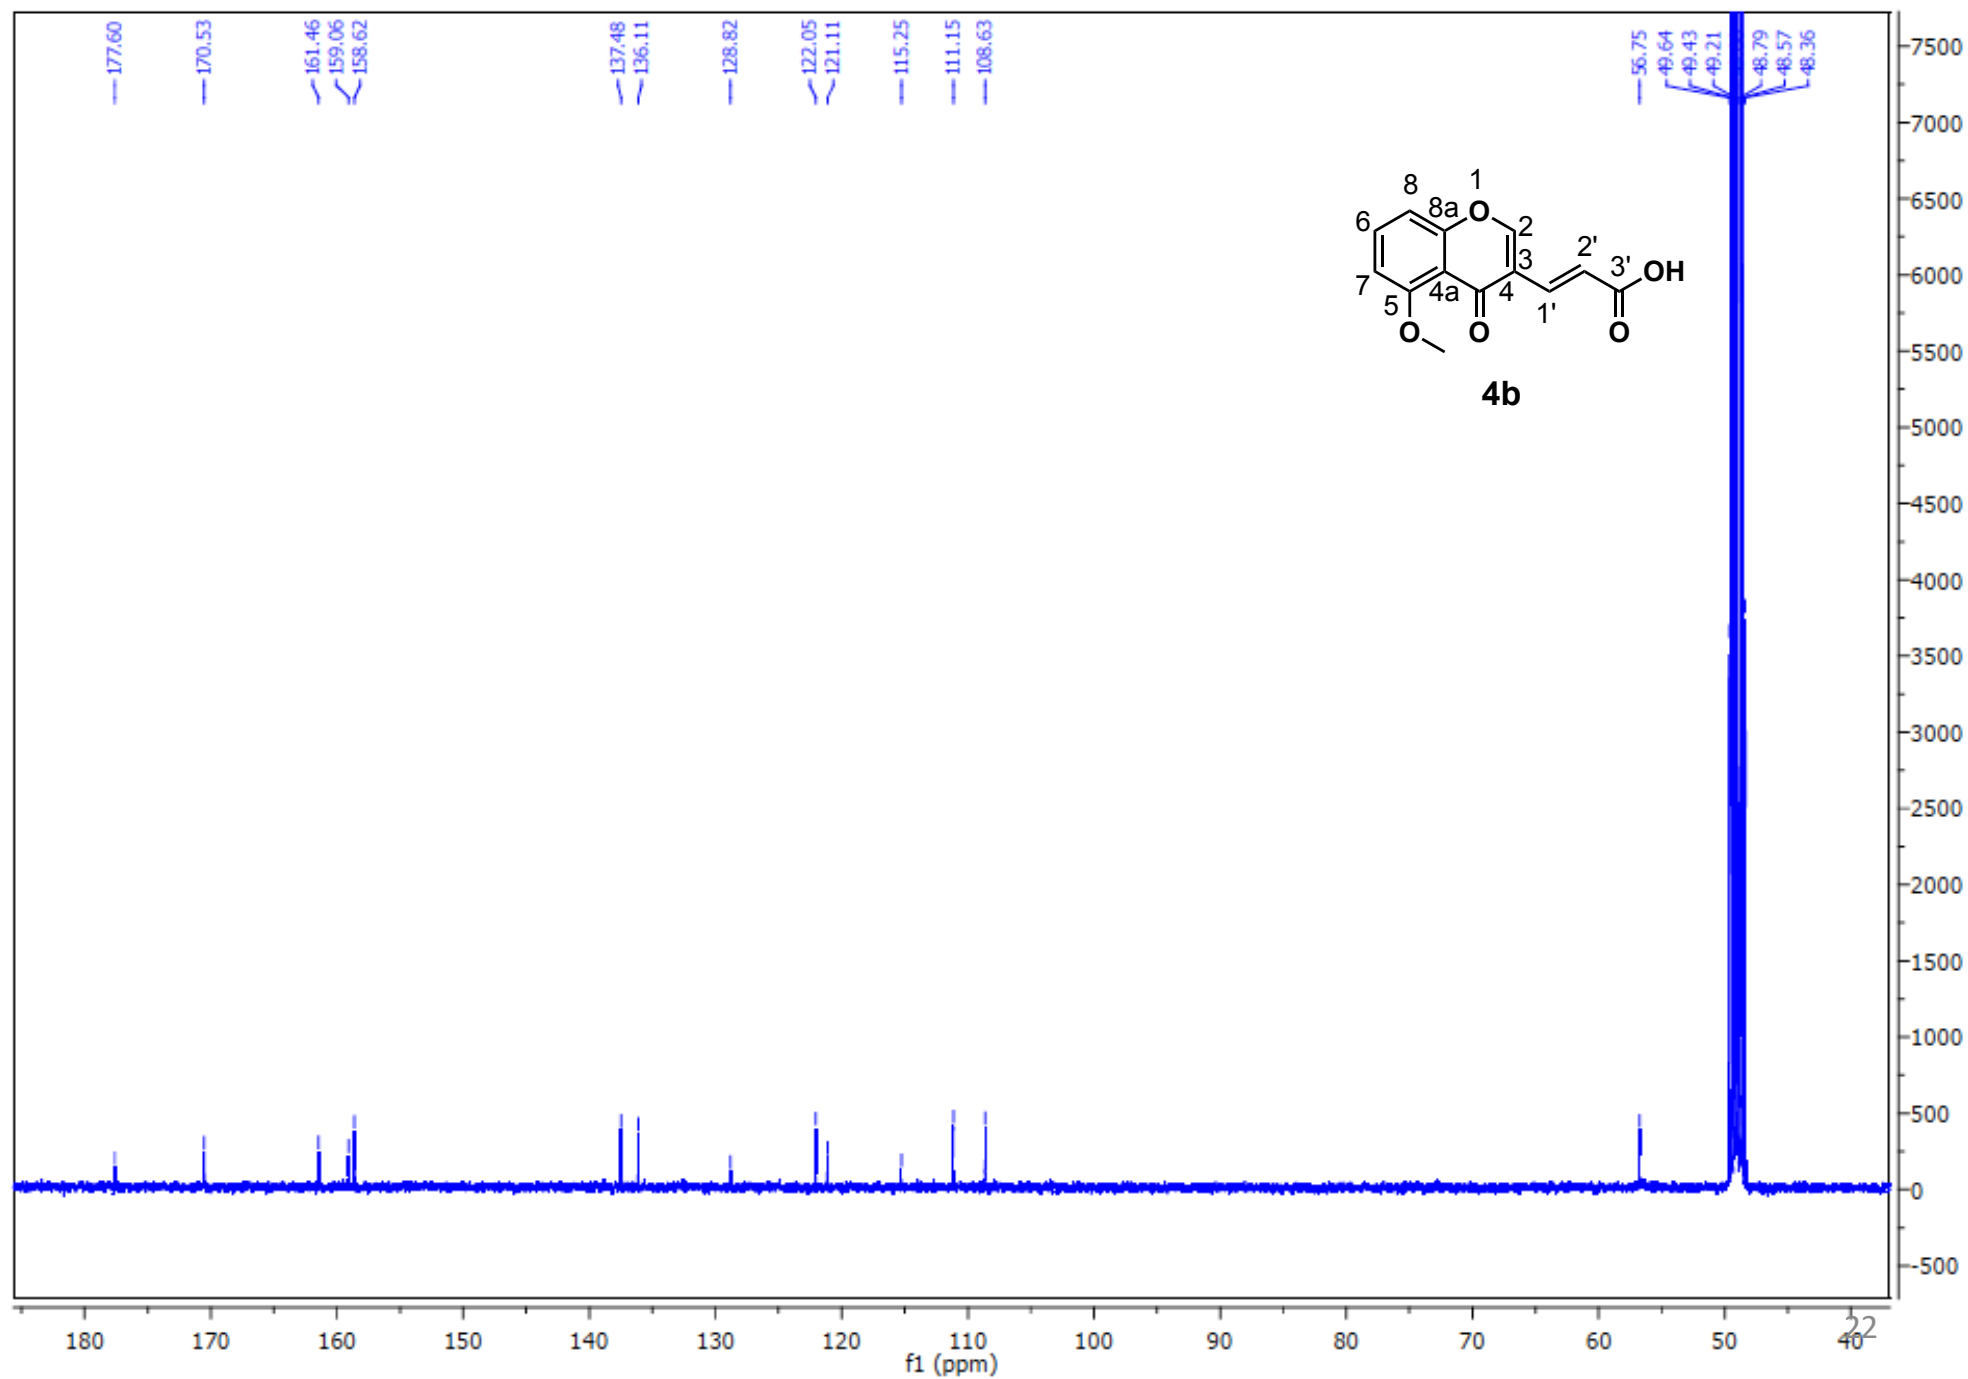

Figure S11.1.  $^1\text{H}$  NMR spectra of compound 4c

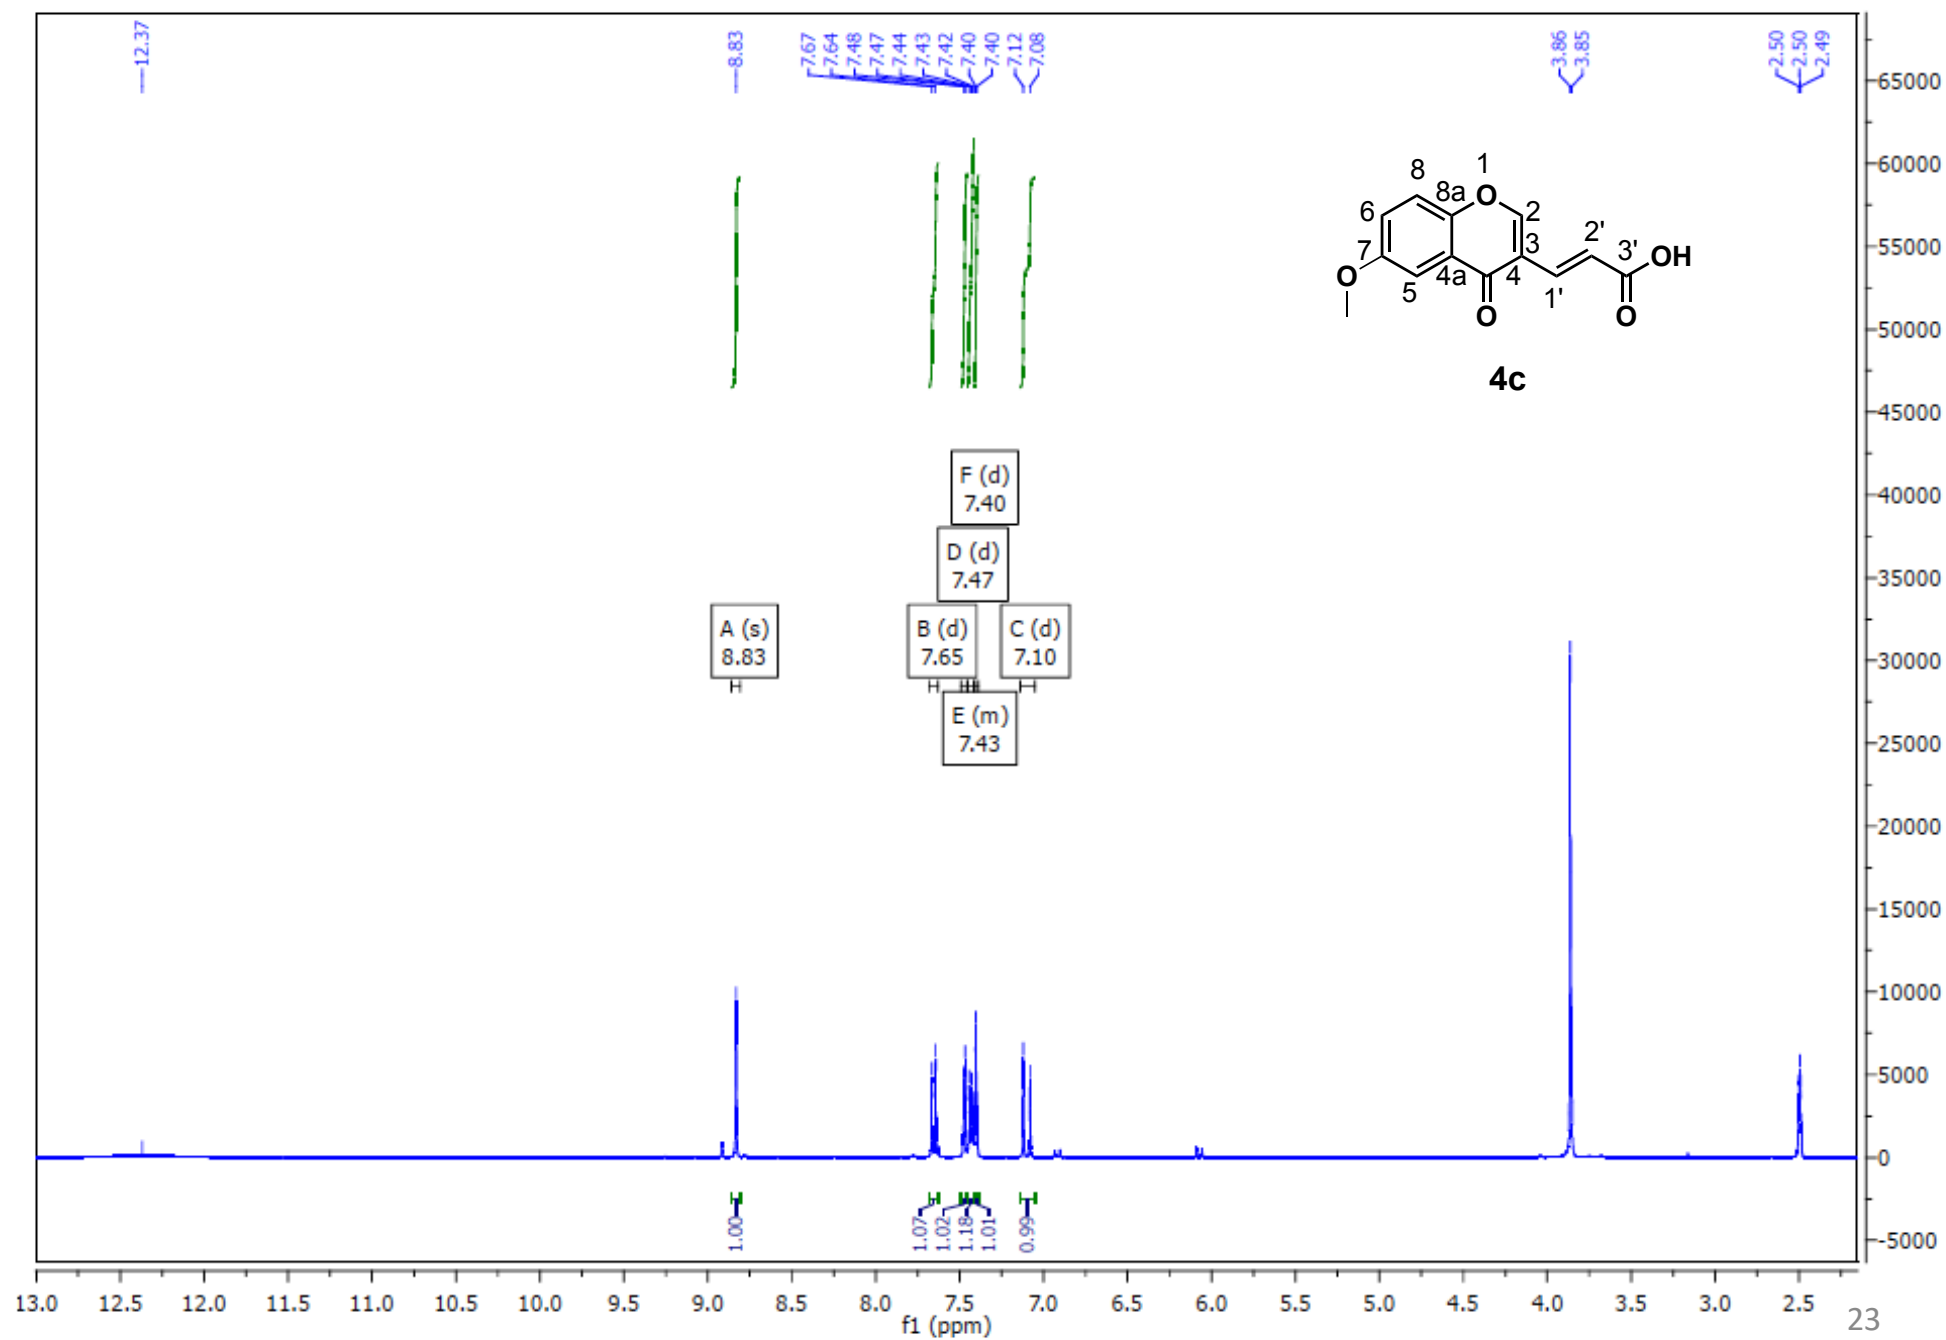

Figure S11.2.  $^{13}\text{C}$  NMR spectra of compound 4c

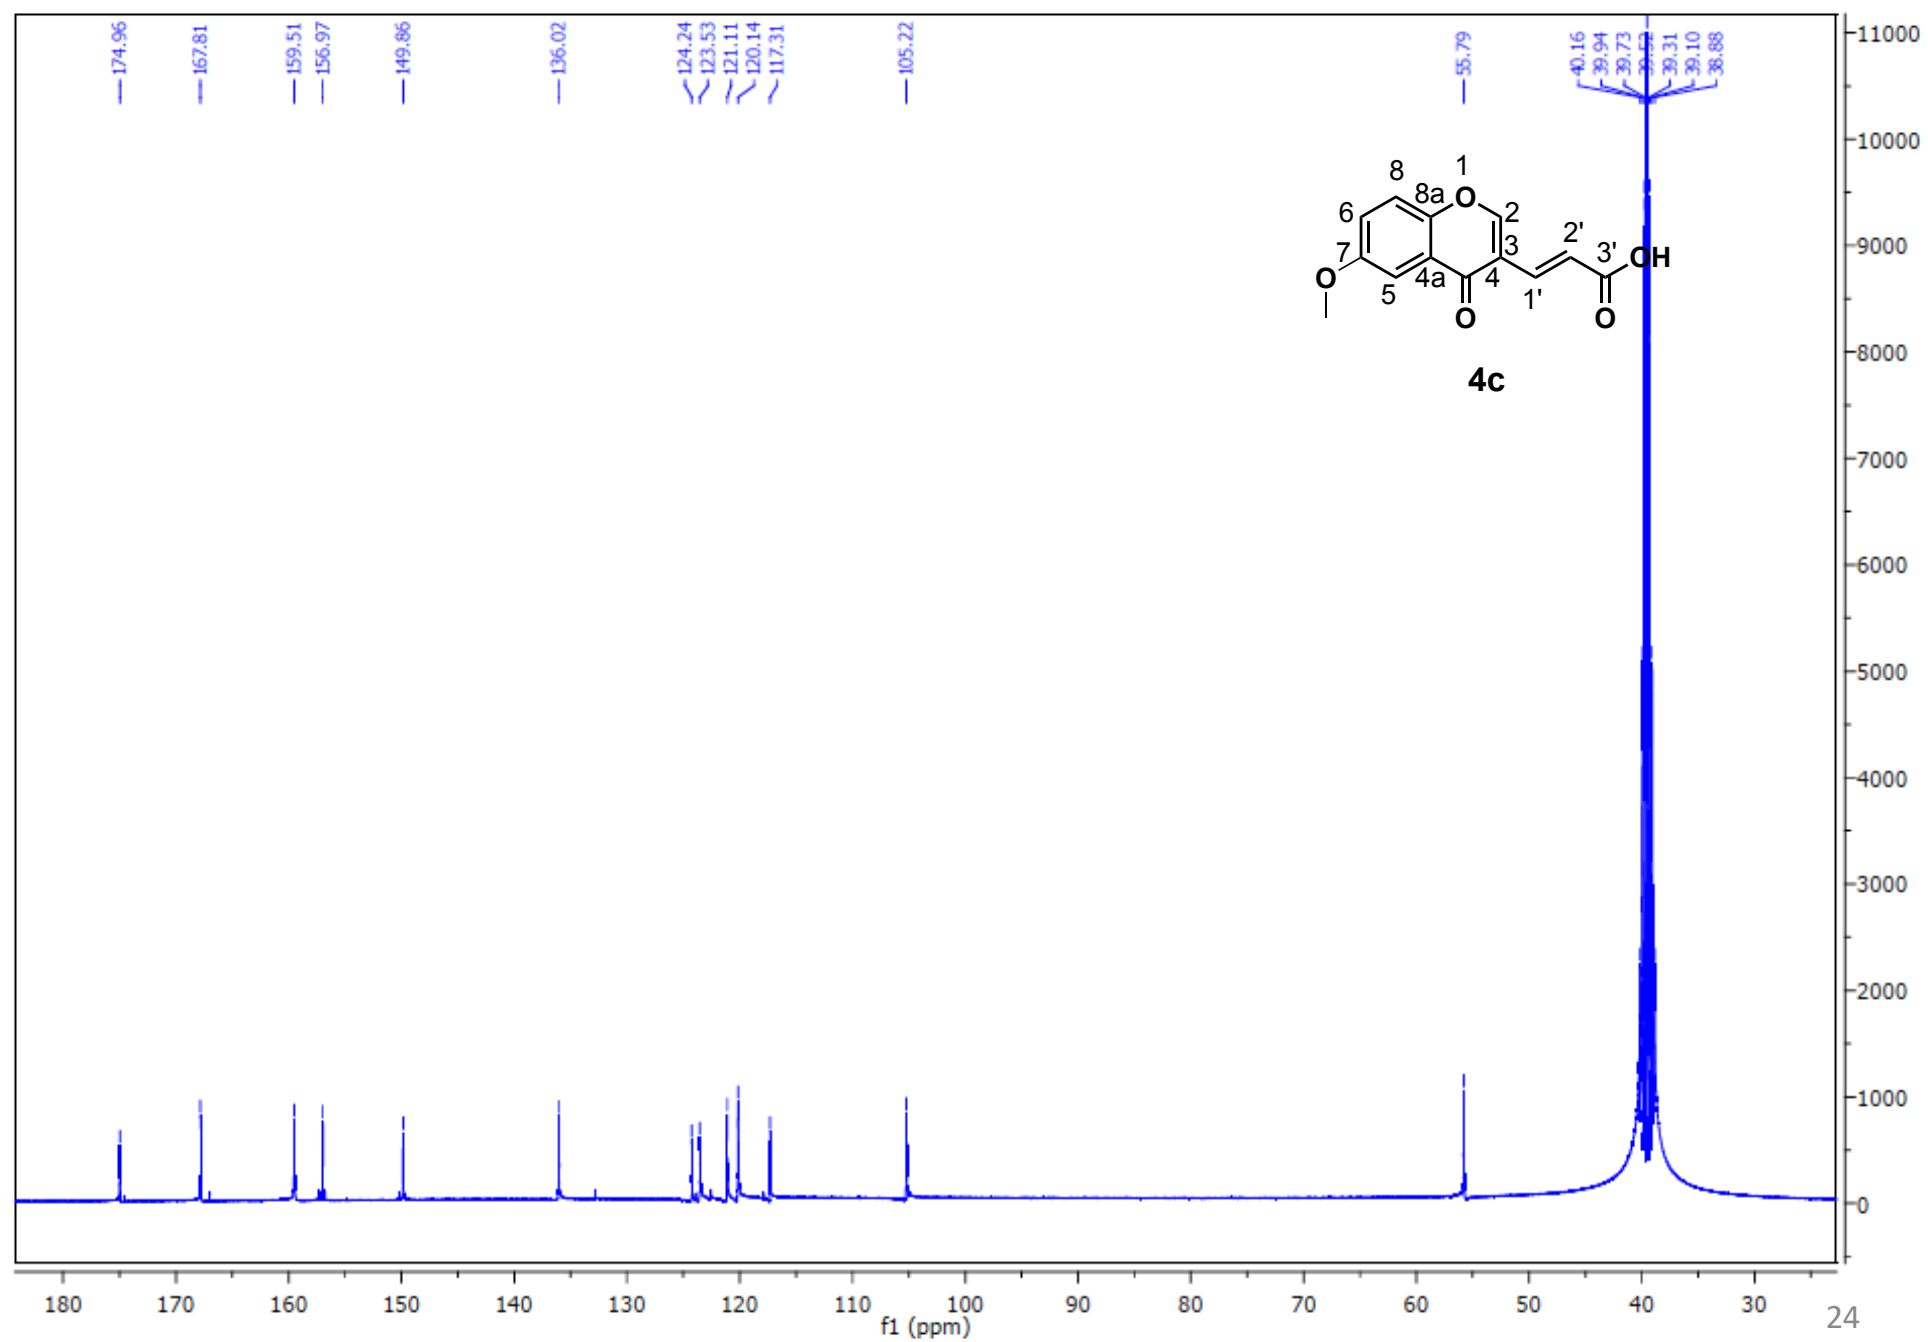



Figure S12.1.  $^1\text{H}$  NMR spectra of compound 4d

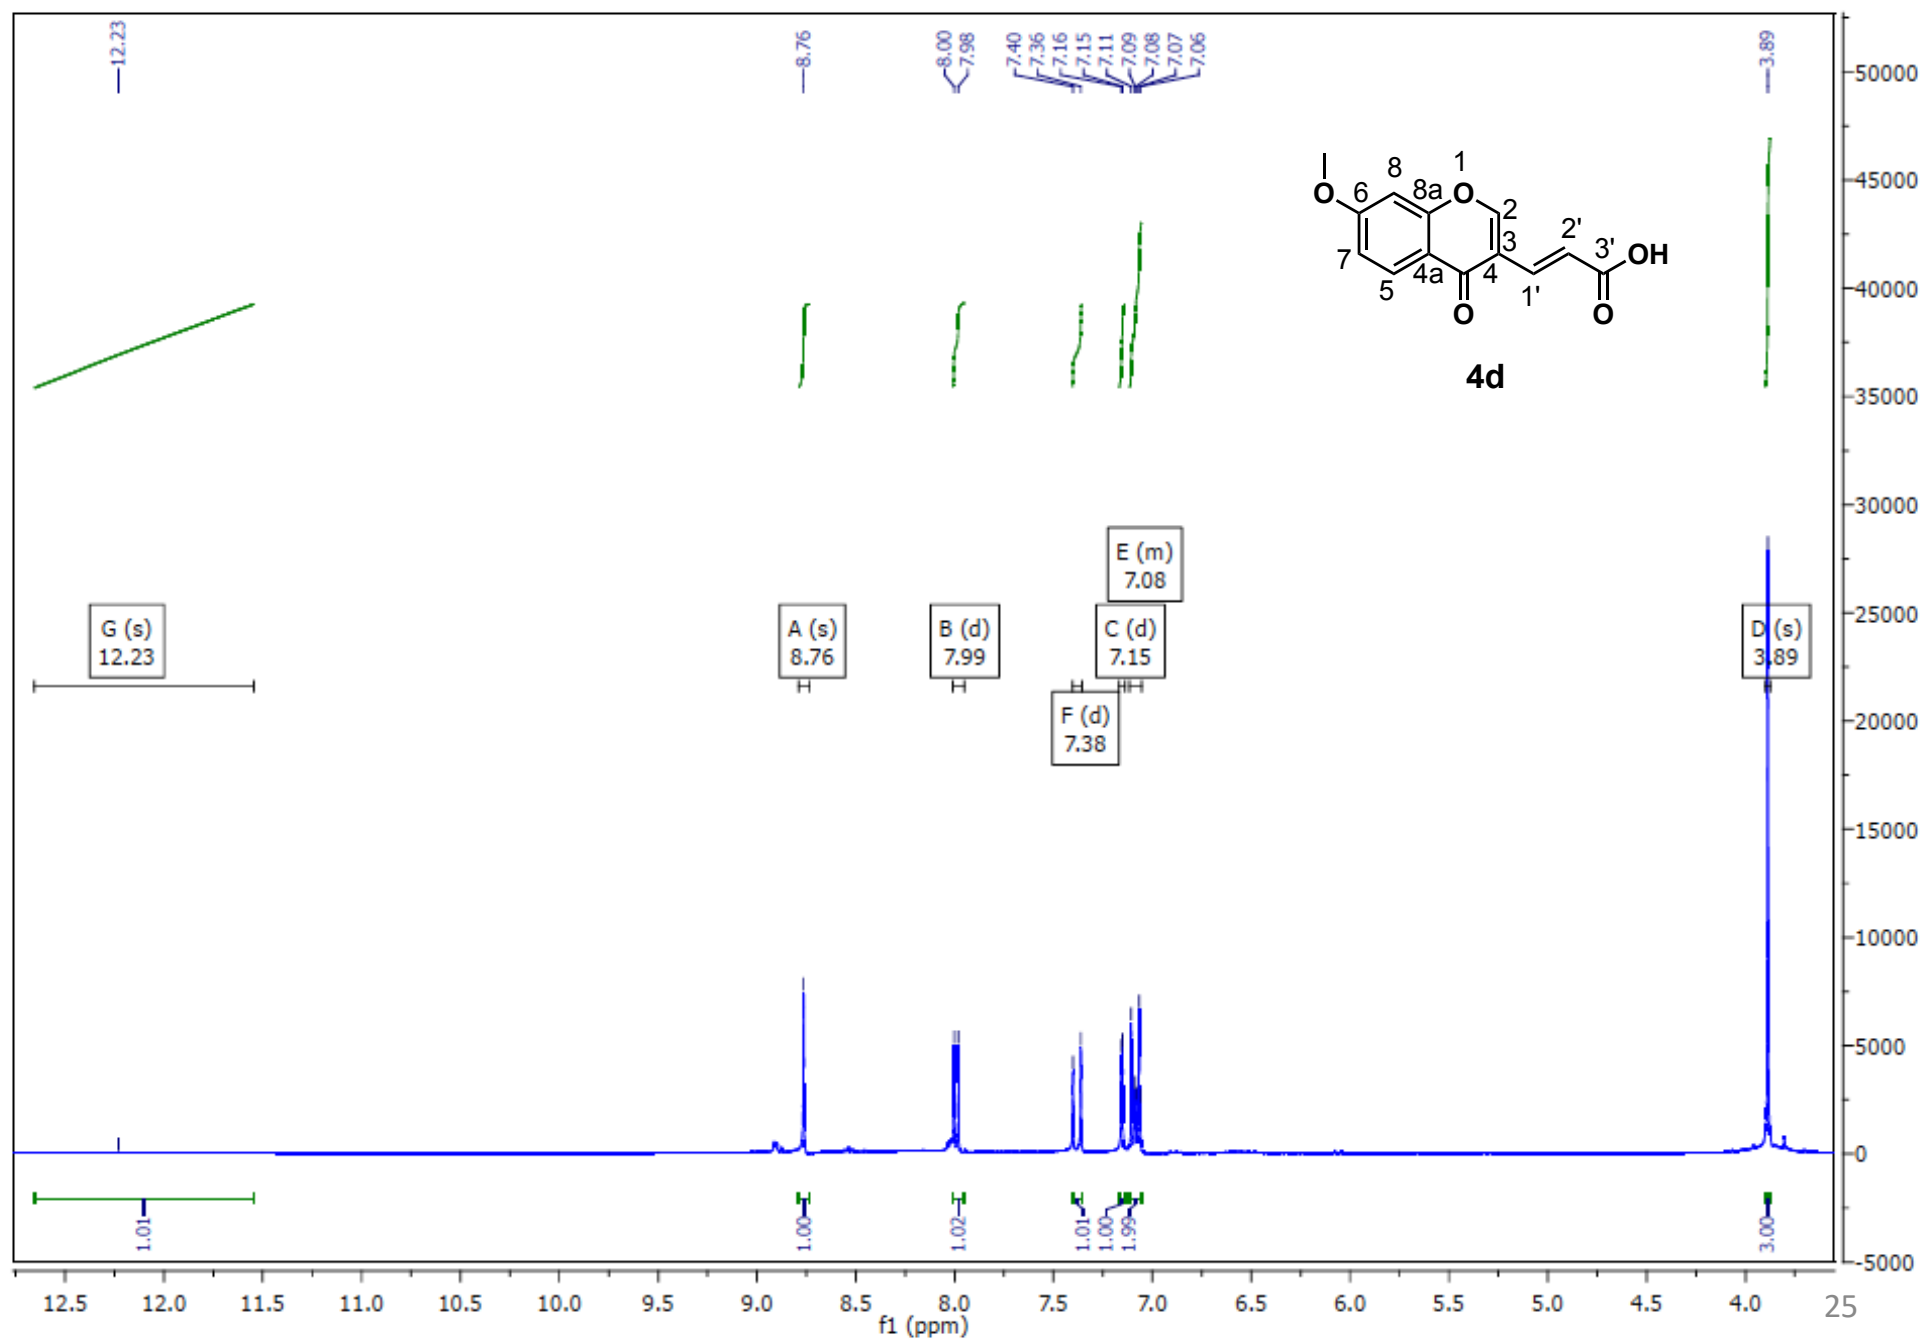

Figure S12.2.  $^{13}\text{C}$  NMR spectra of compound 4d

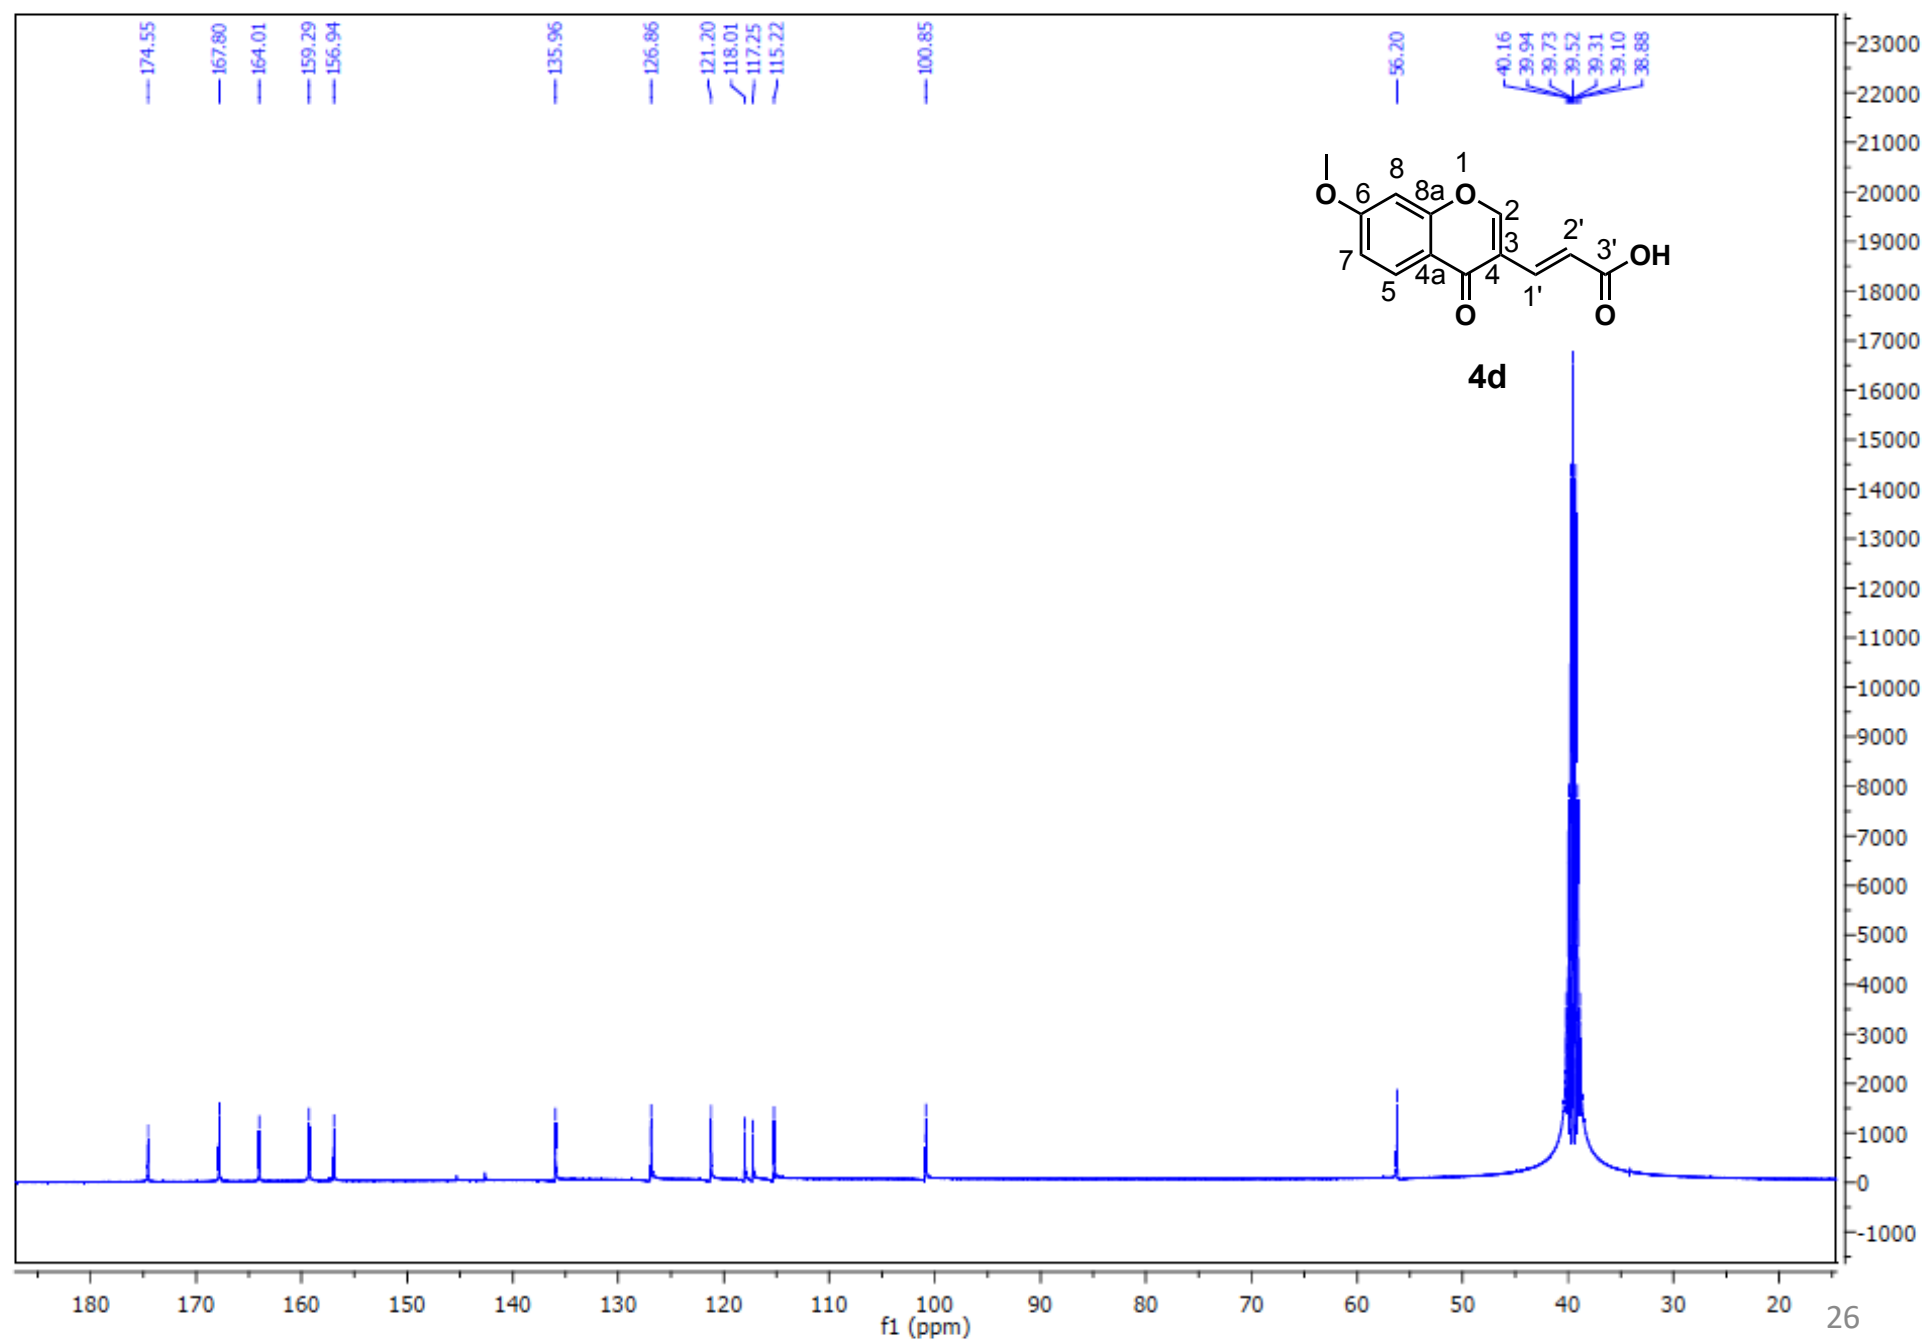

Figure S12.3.  $^{13}\text{C}$ -DEPT NMR spectra of compound 4d

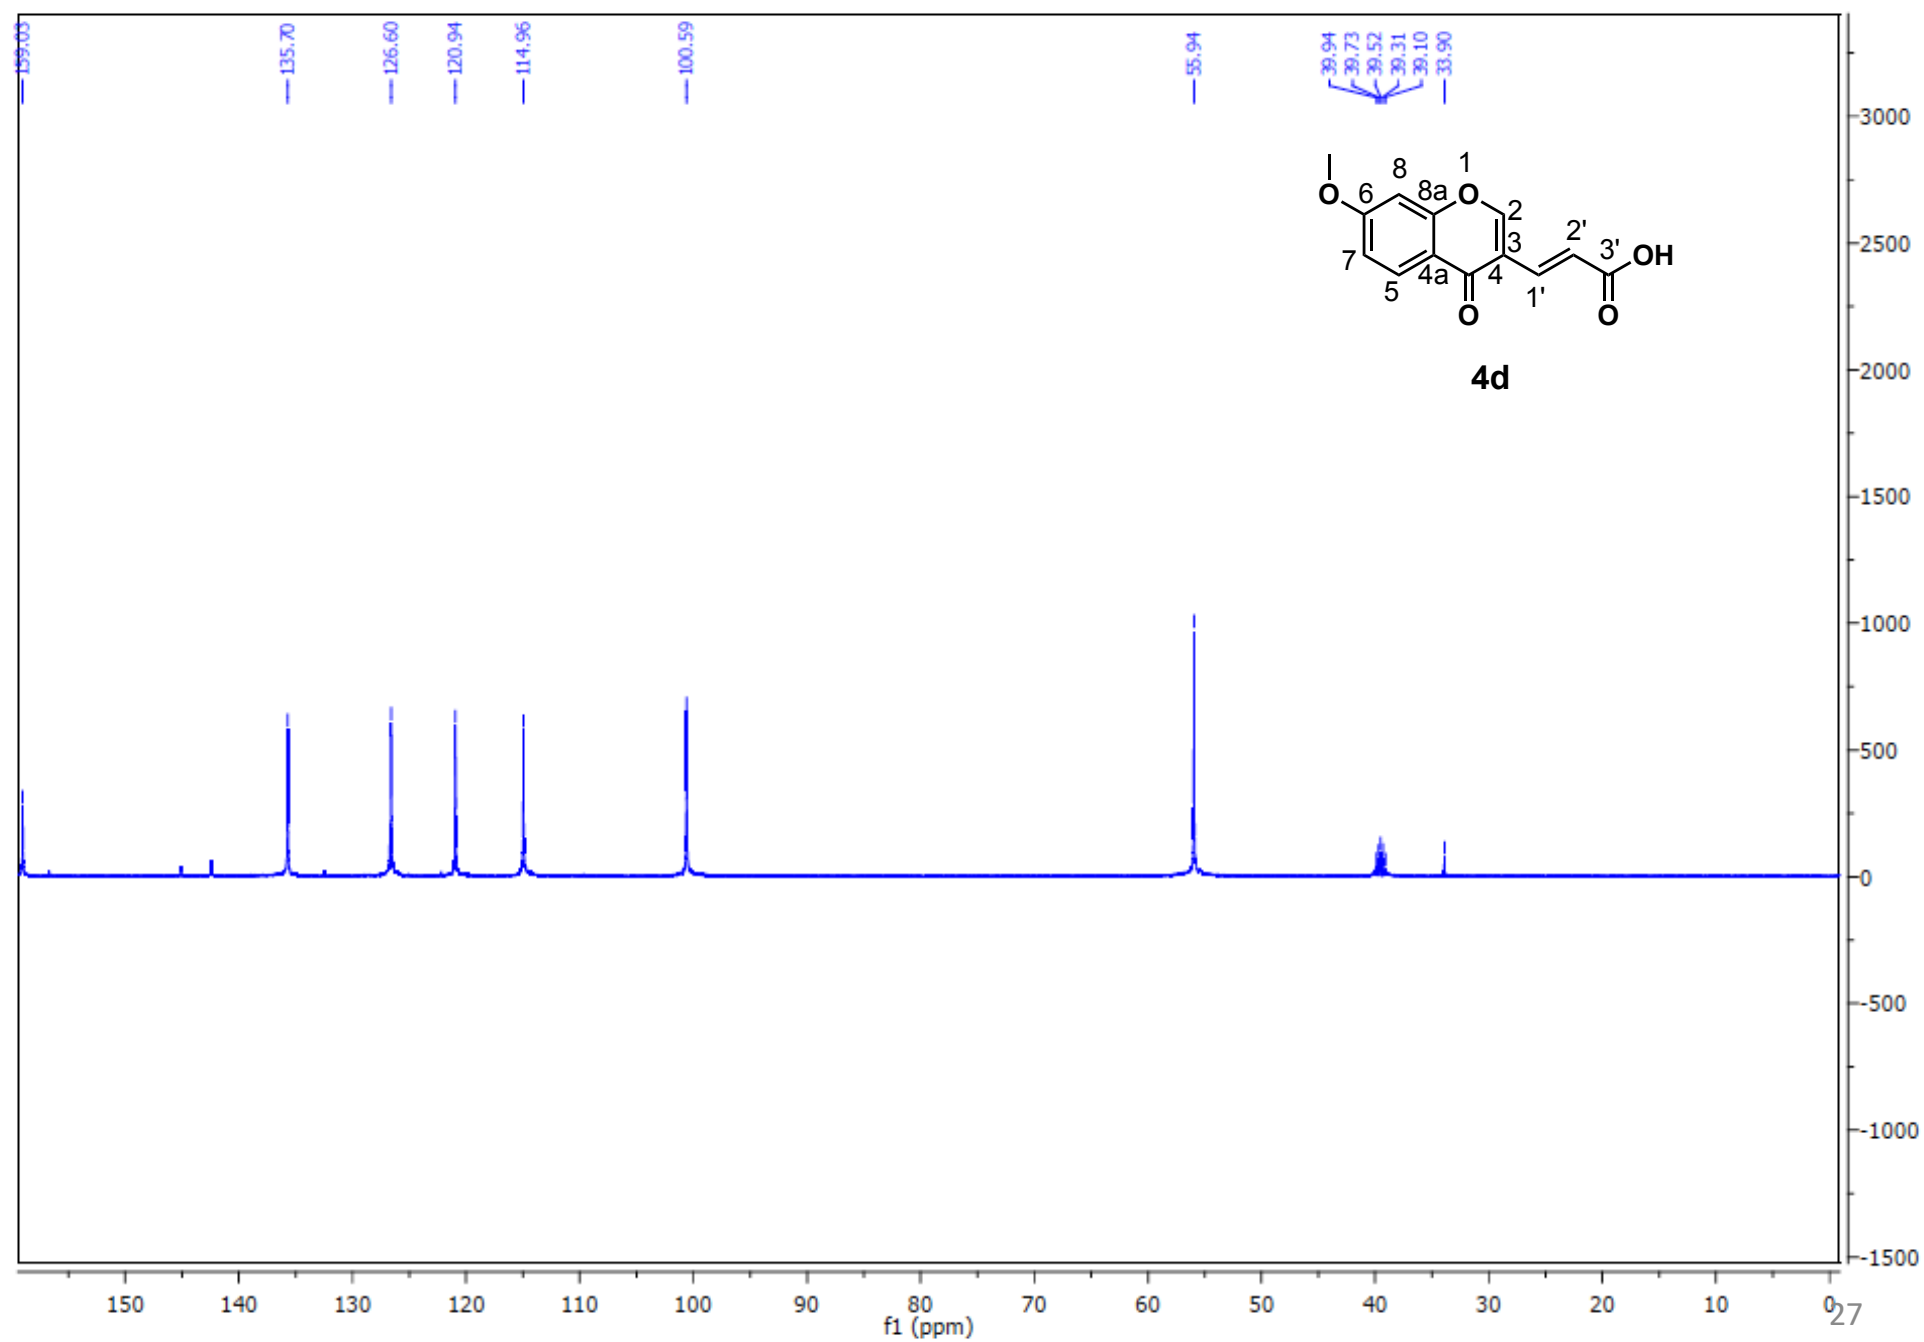

Figure S13.1.  $^1\text{H}$  NMR spectra of compound 5a

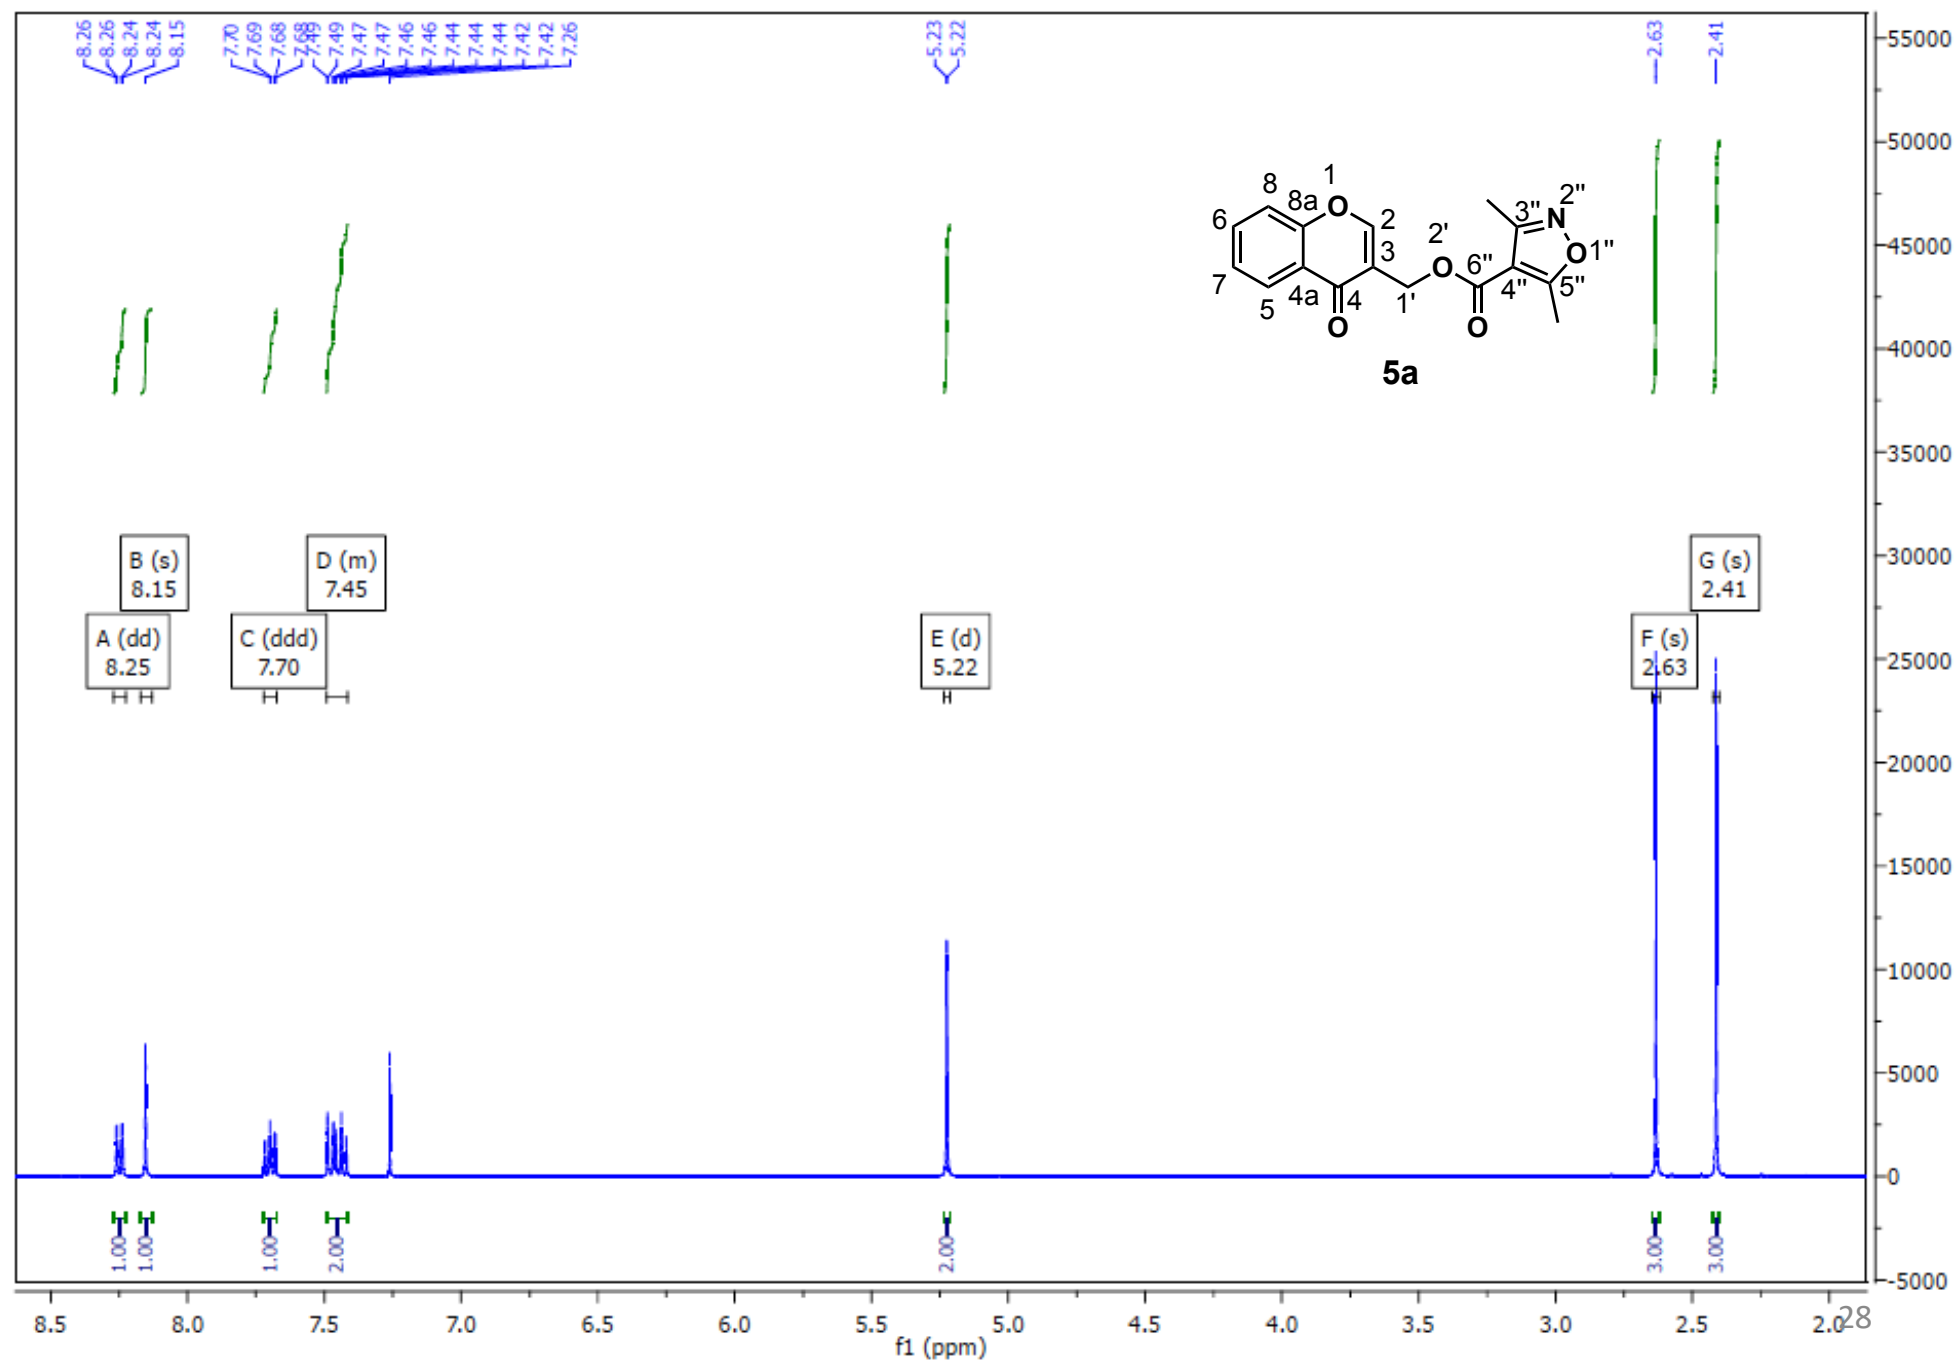

Figure S13.2.  $^{13}\text{C}$  NMR spectra of compound 5a

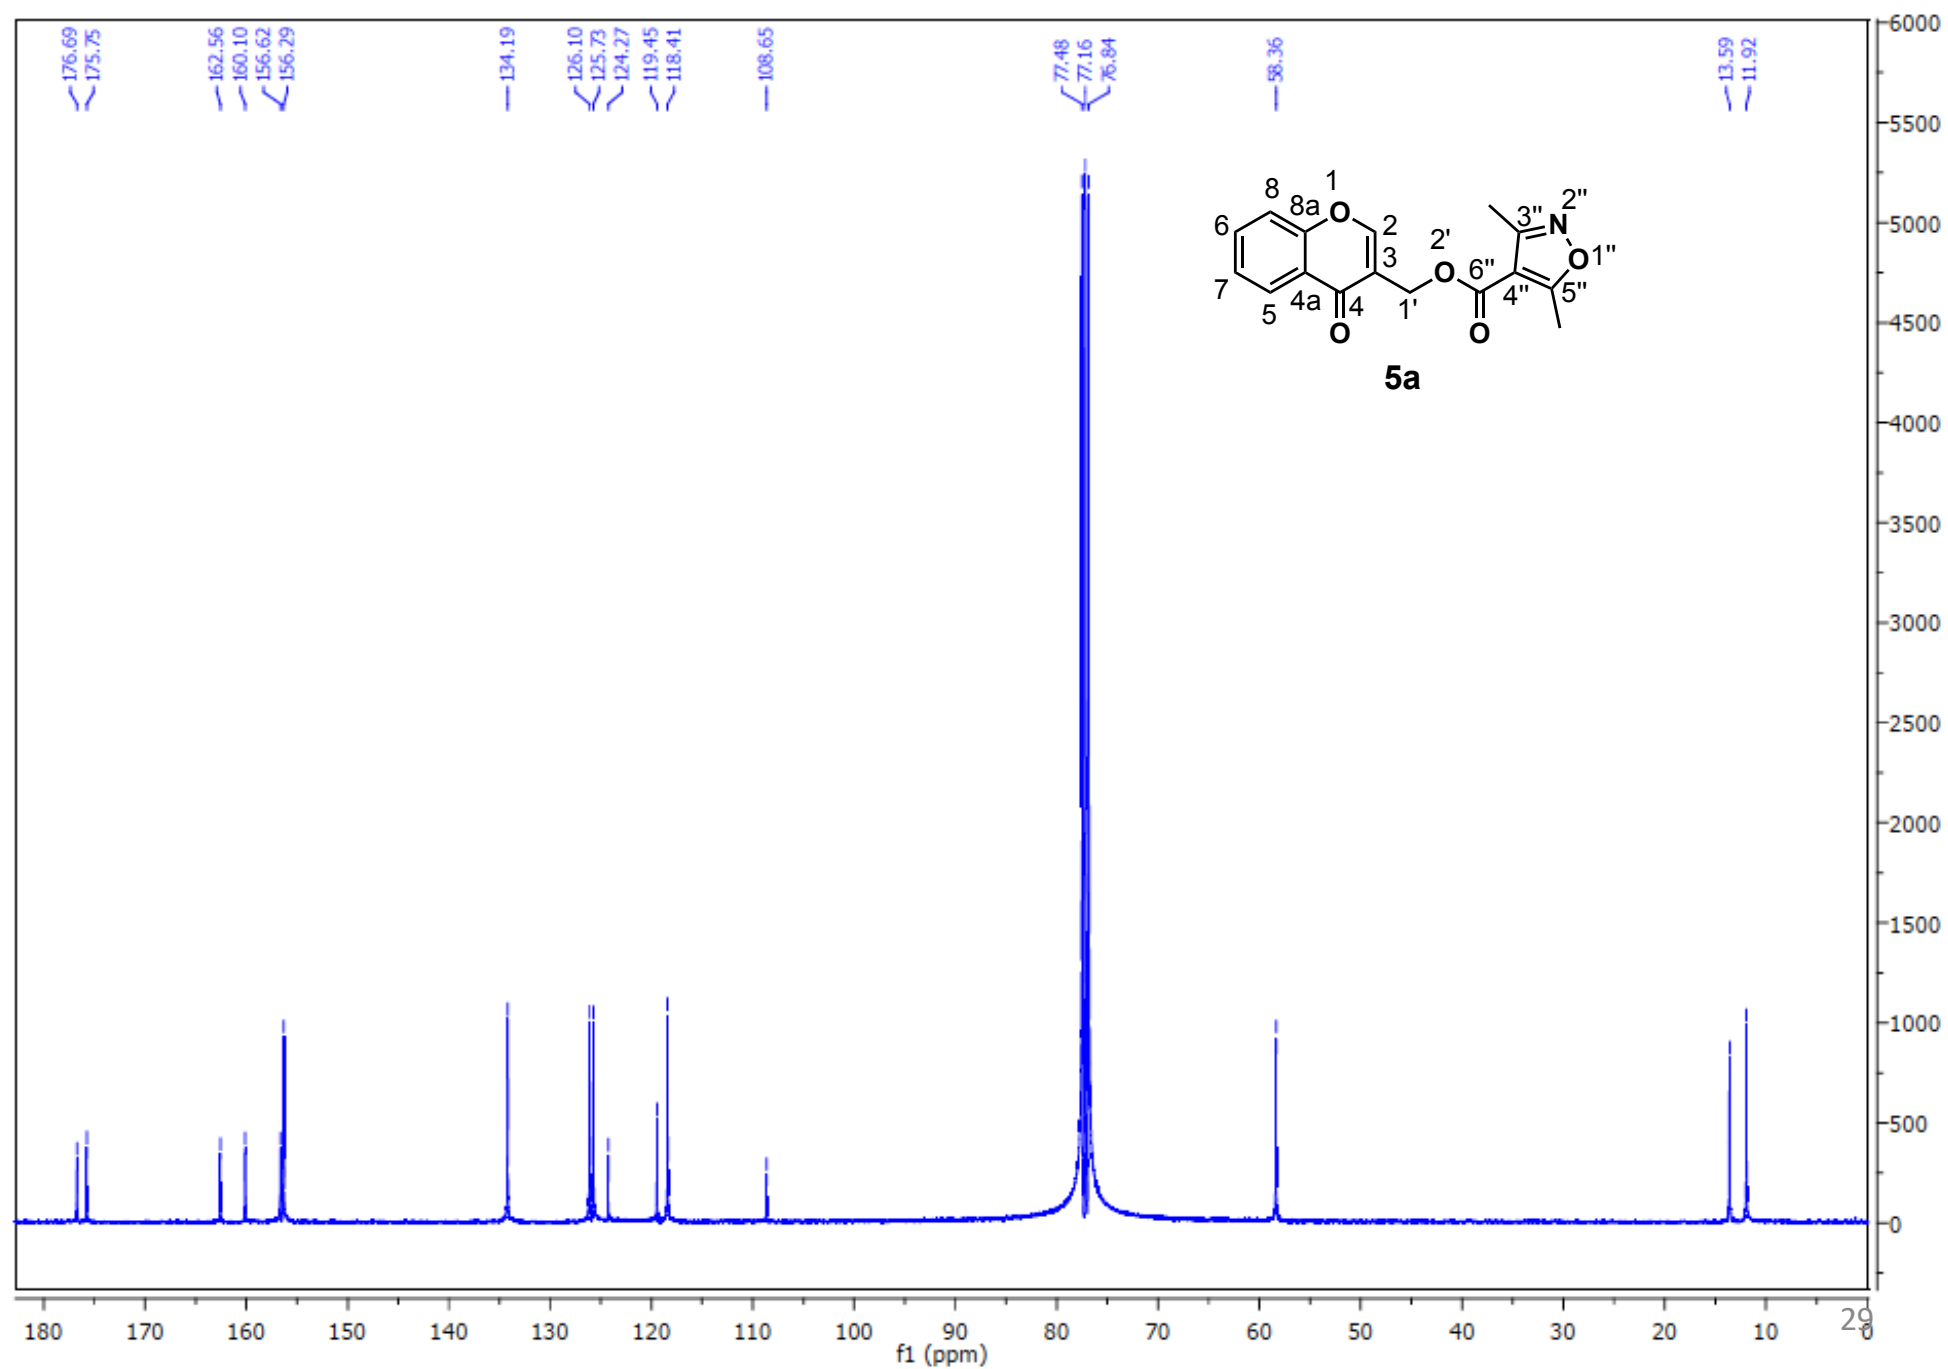

Figure S14.1.  $^1\text{H}$  NMR spectra of compound **5b**

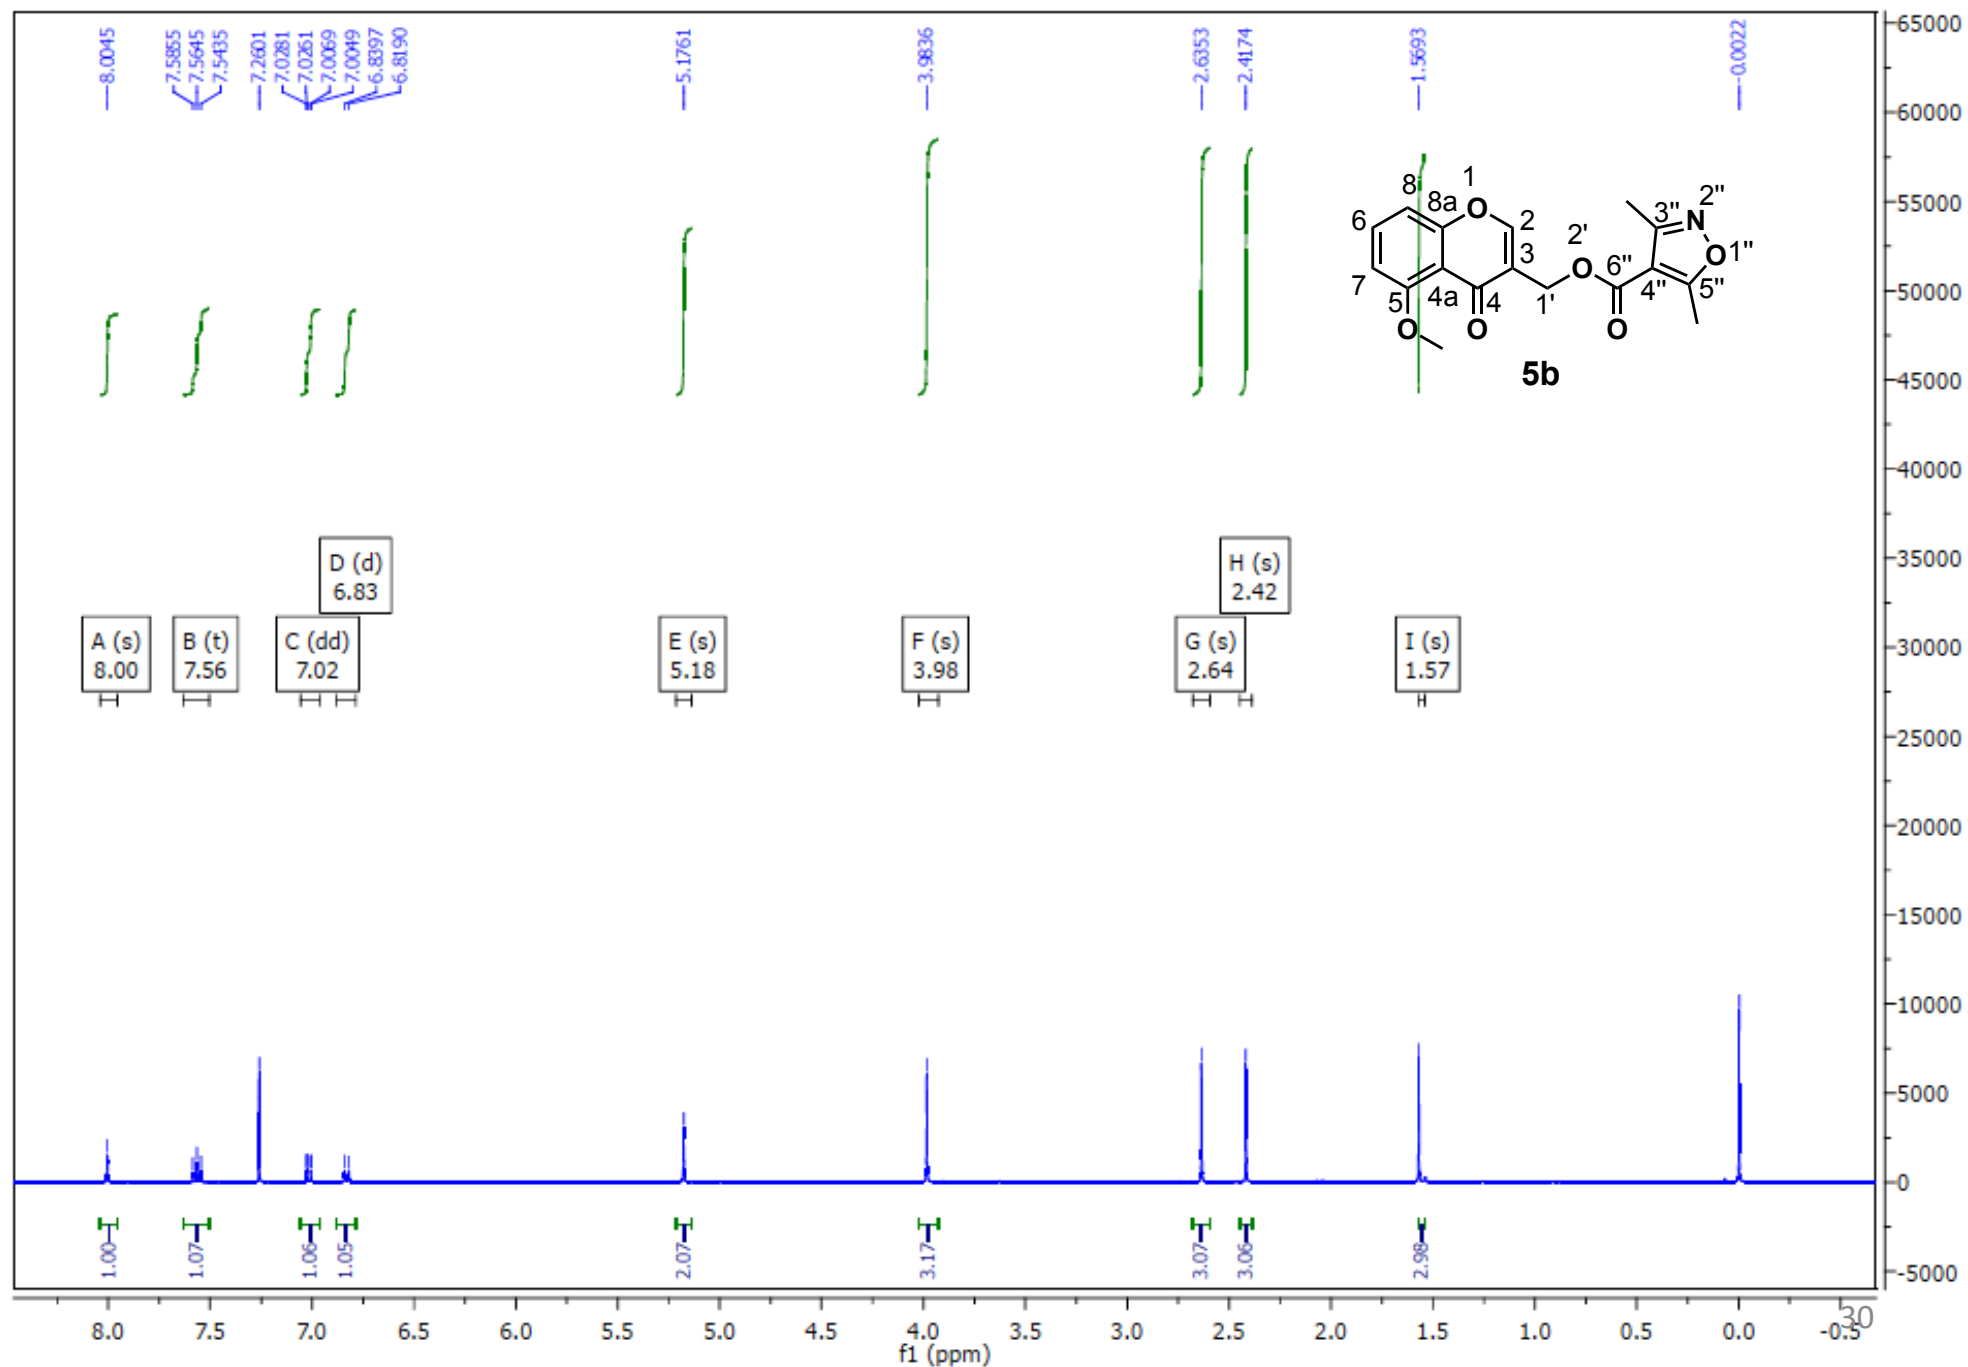

Figure S14.2.  $^{13}\text{C}$  NMR spectra of compound 5b

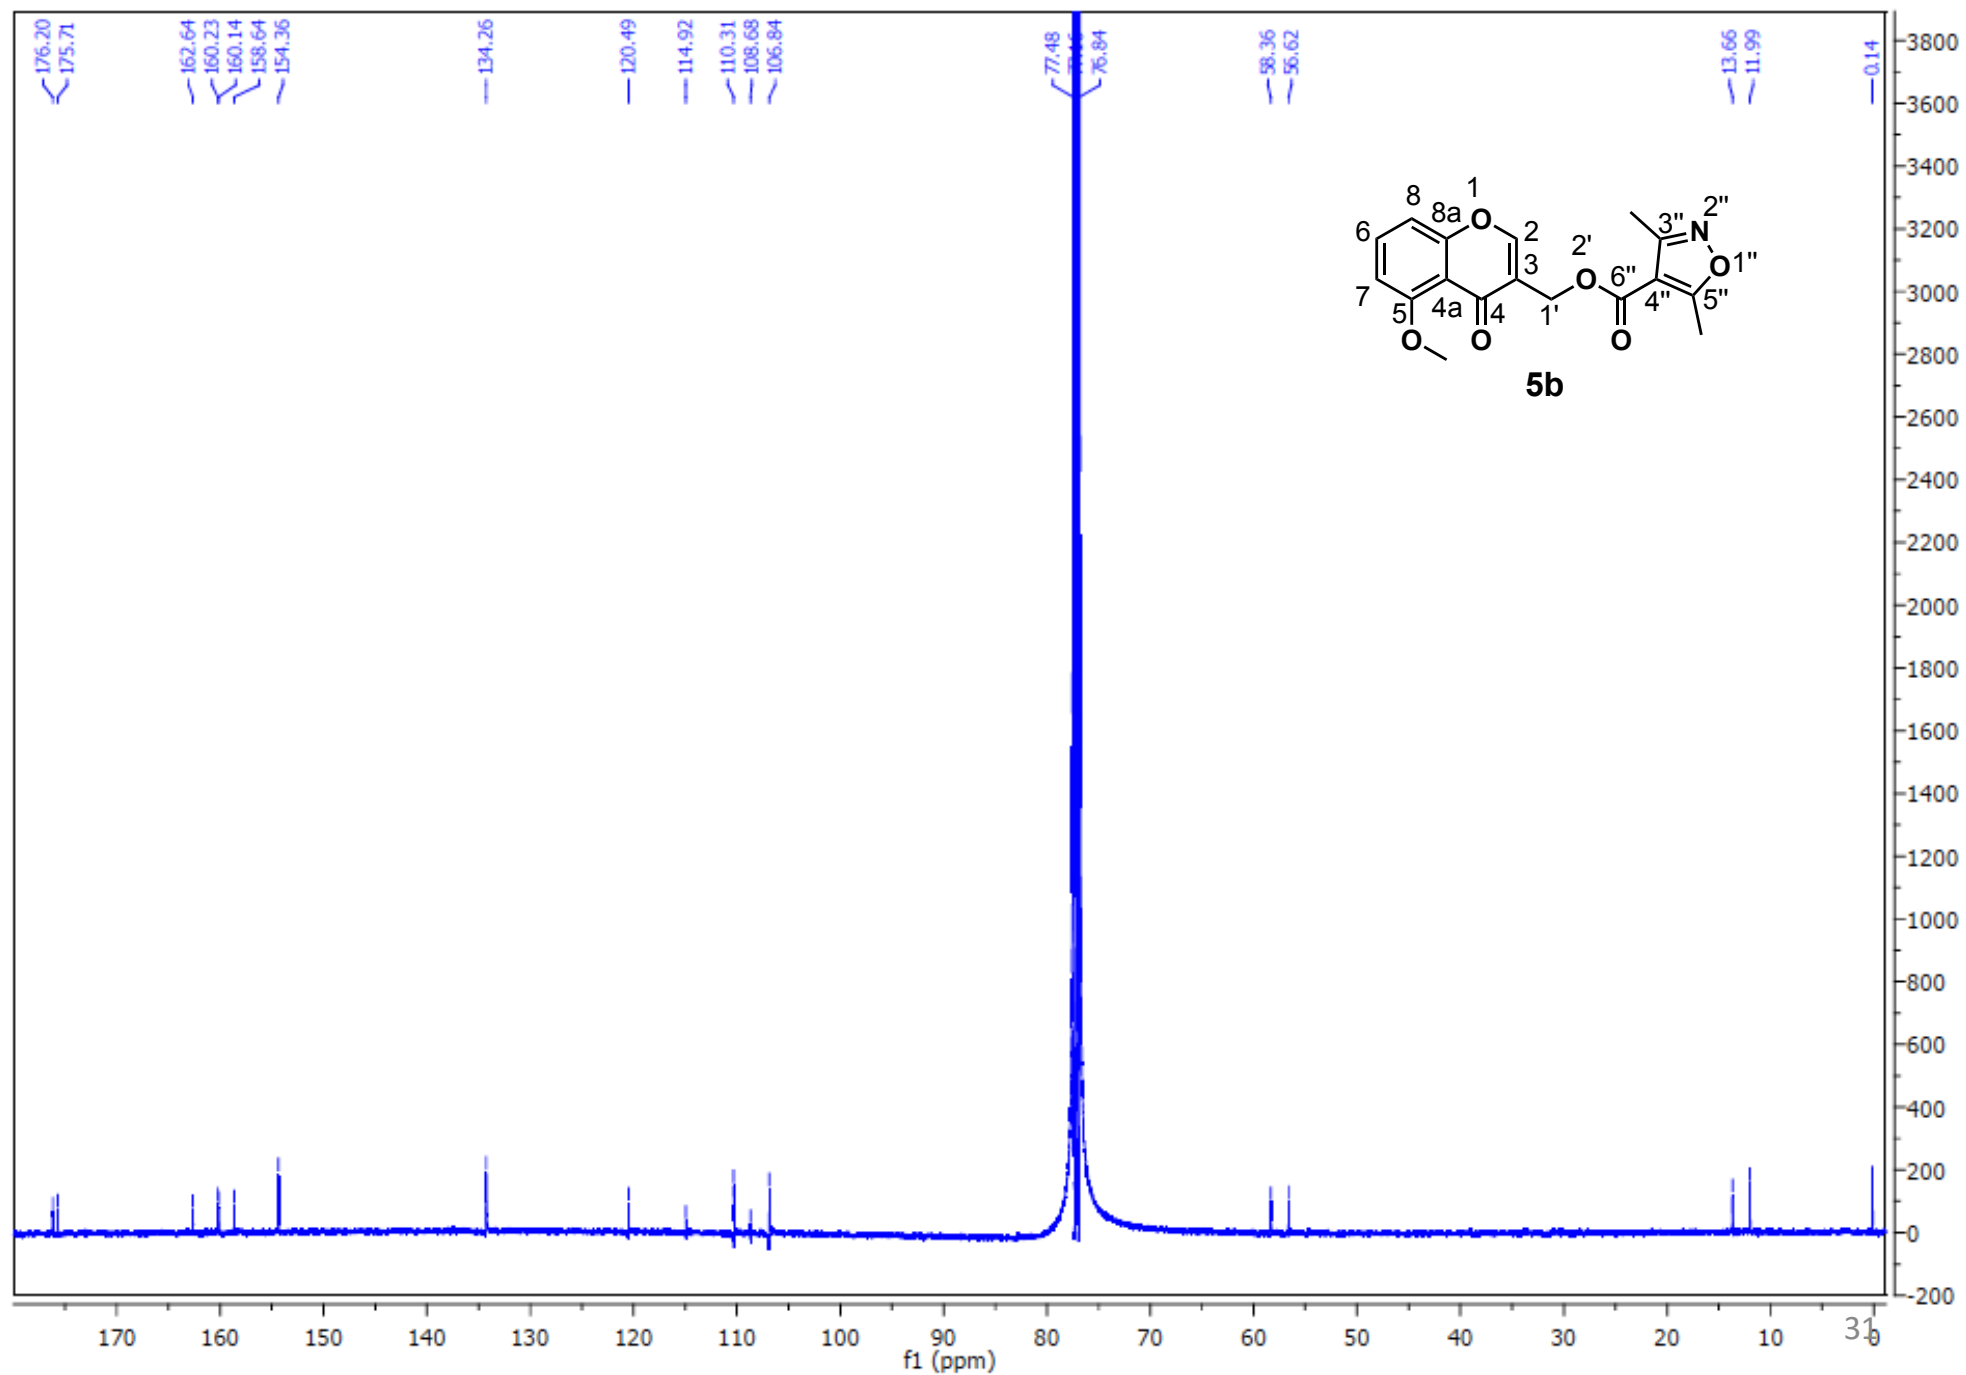

Figure S14.3.  $^{13}\text{C}$ -DEPT NMR spectra of compound 5b

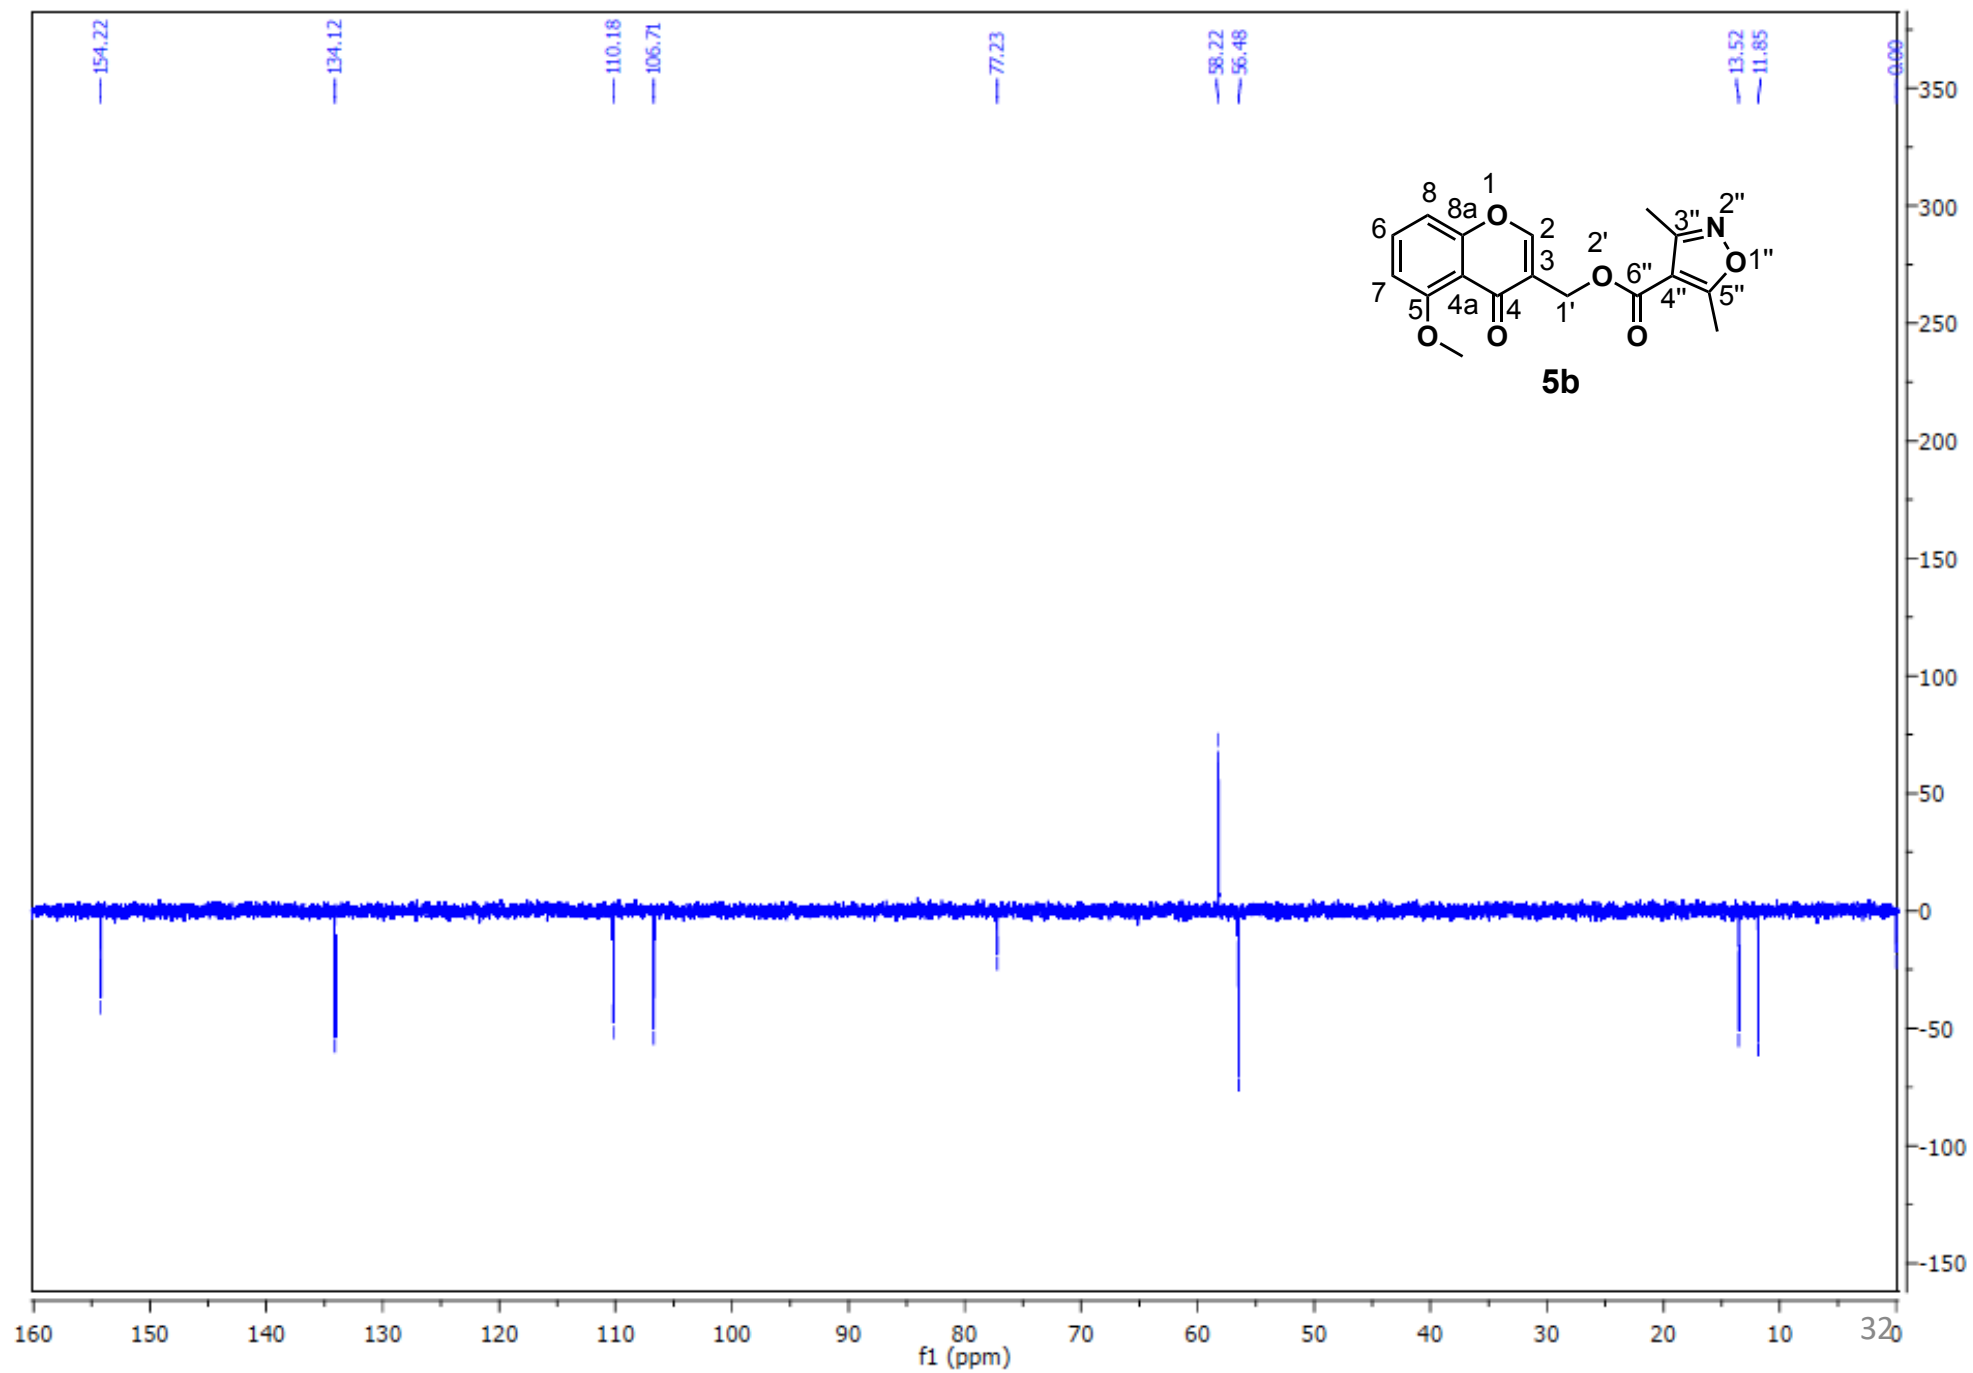



Figure S15.1.  $^1\text{H}$  NMR spectra of compound 5c

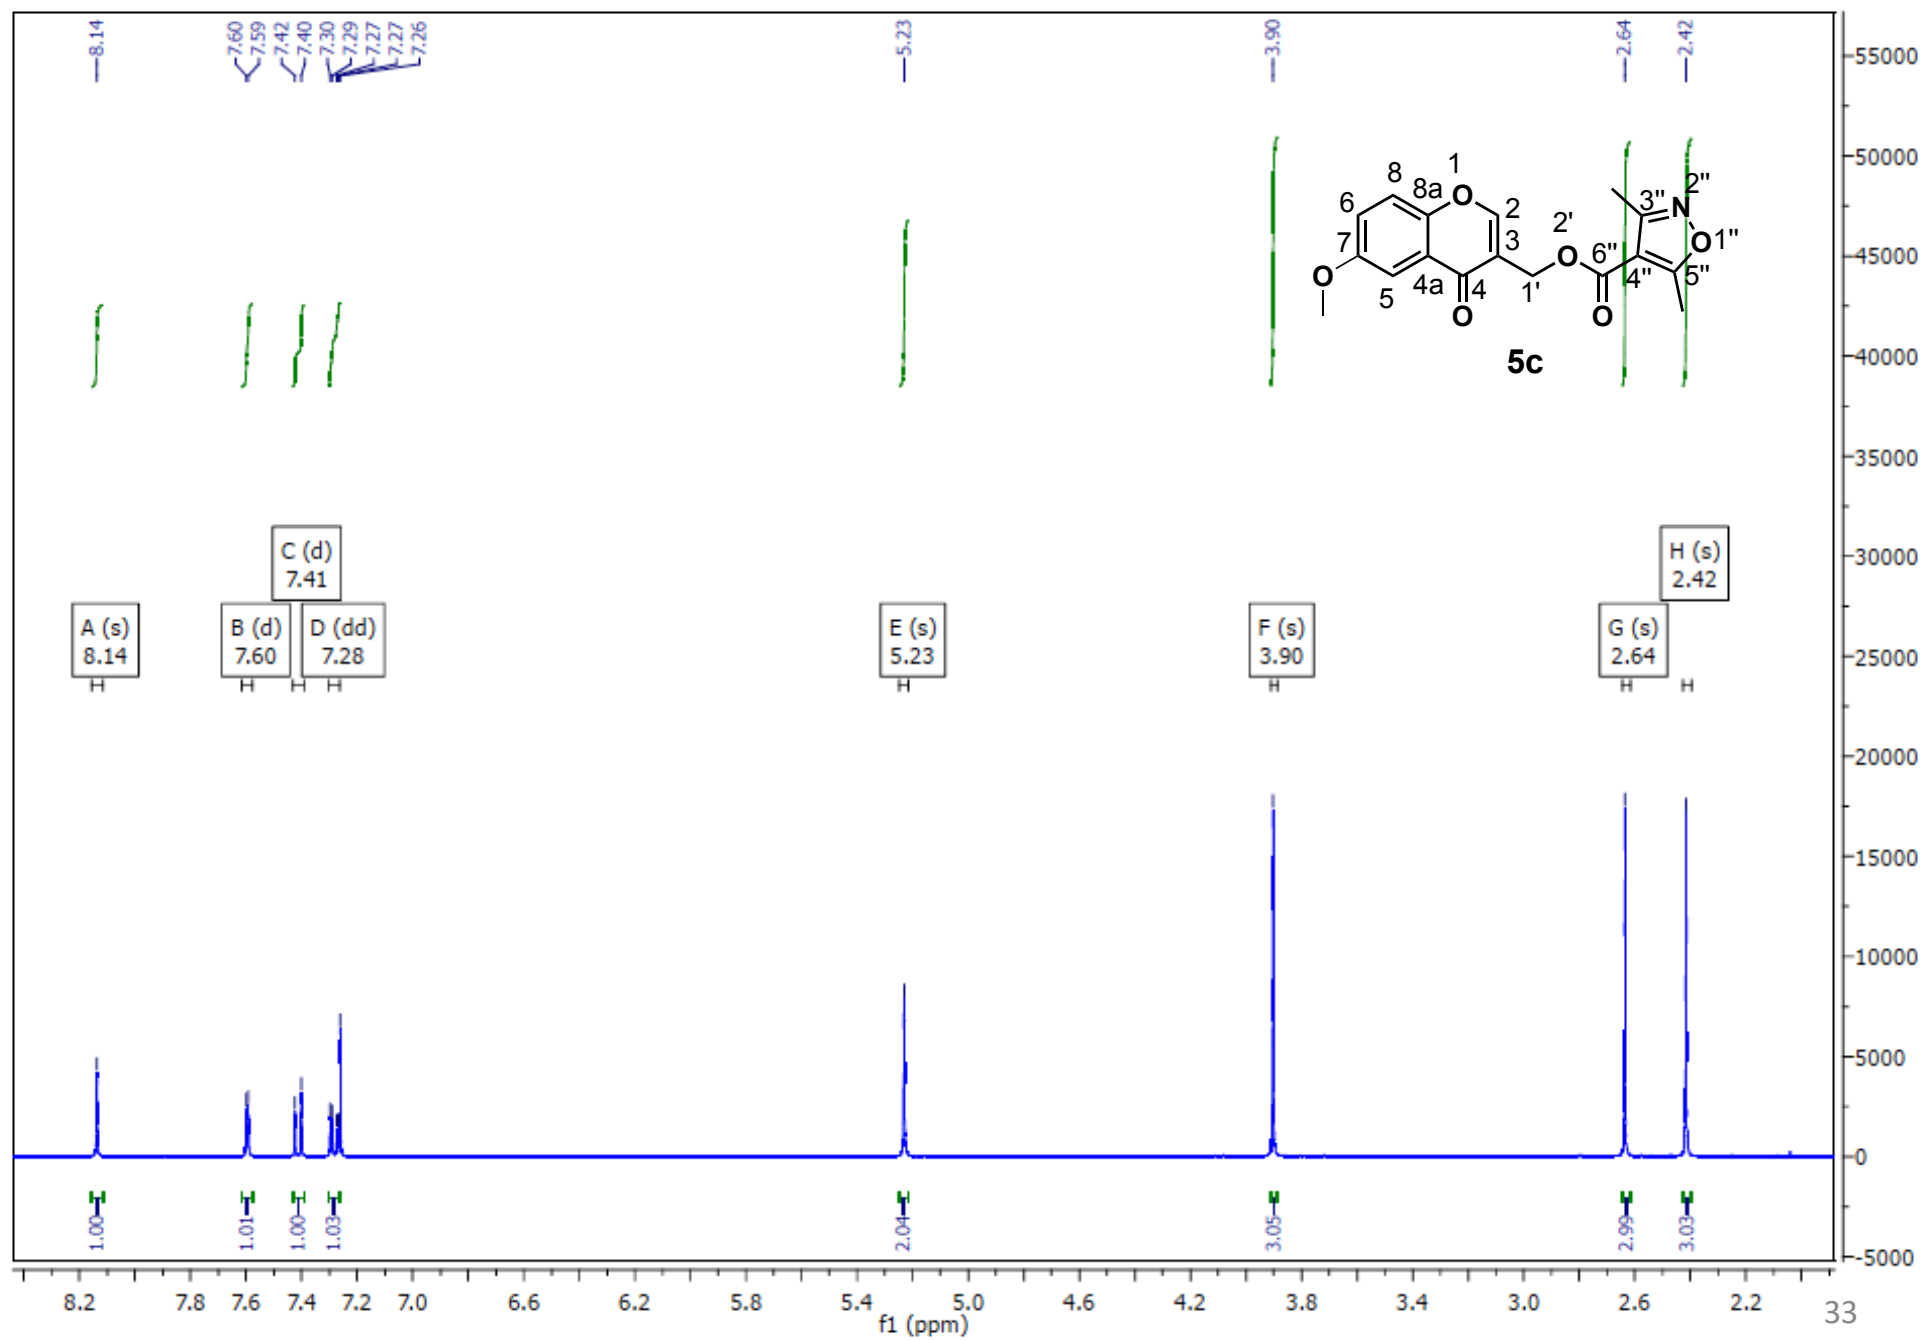

Figure S15.2.  $^{13}\text{C}$  NMR spectra of compound 5c

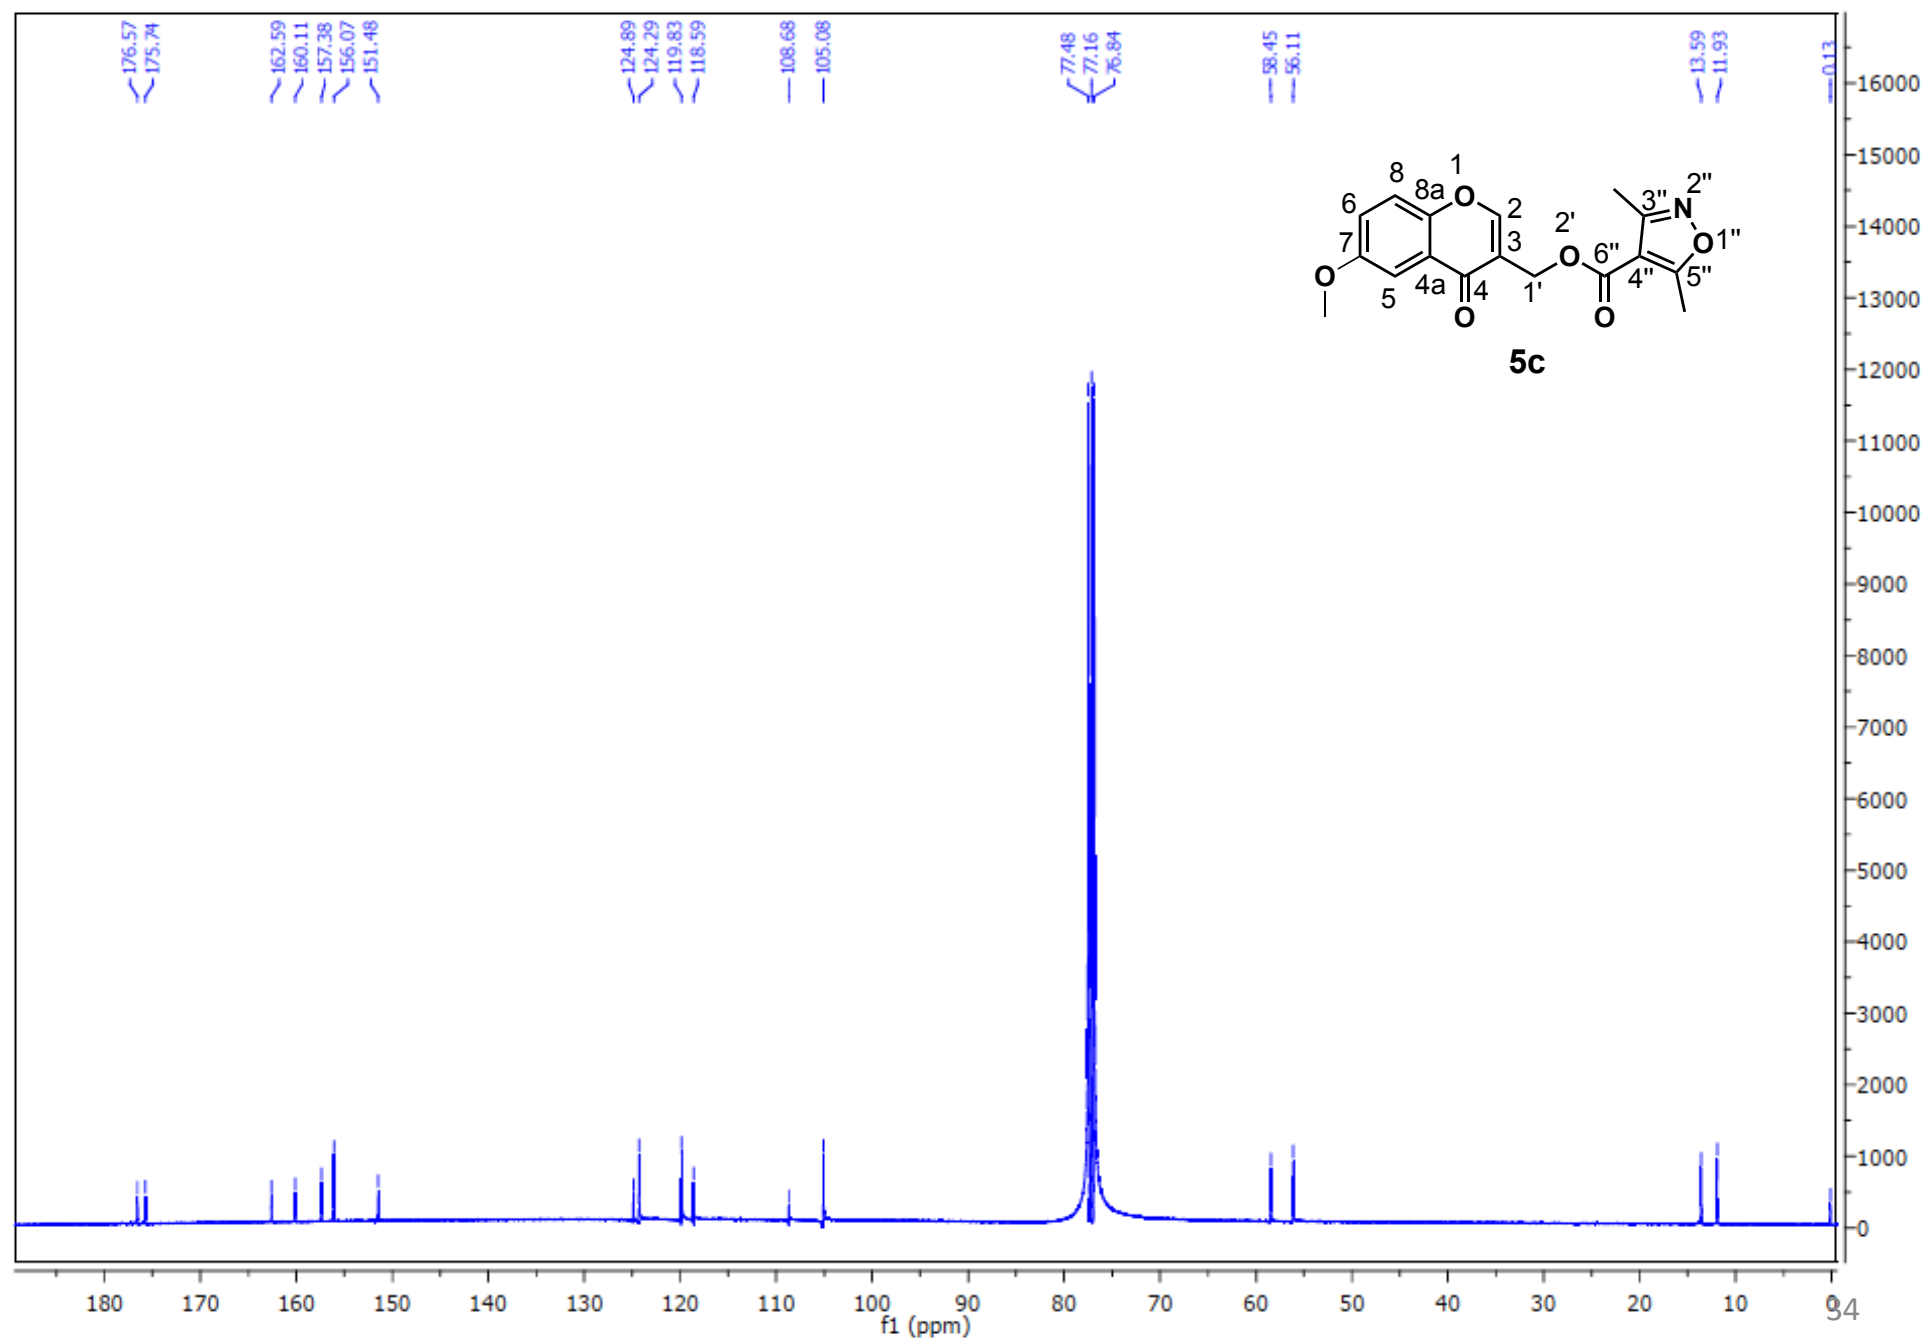

Figure S15.3.  $^{13}\text{C}$ -DEPT NMR spectra of compound 5c

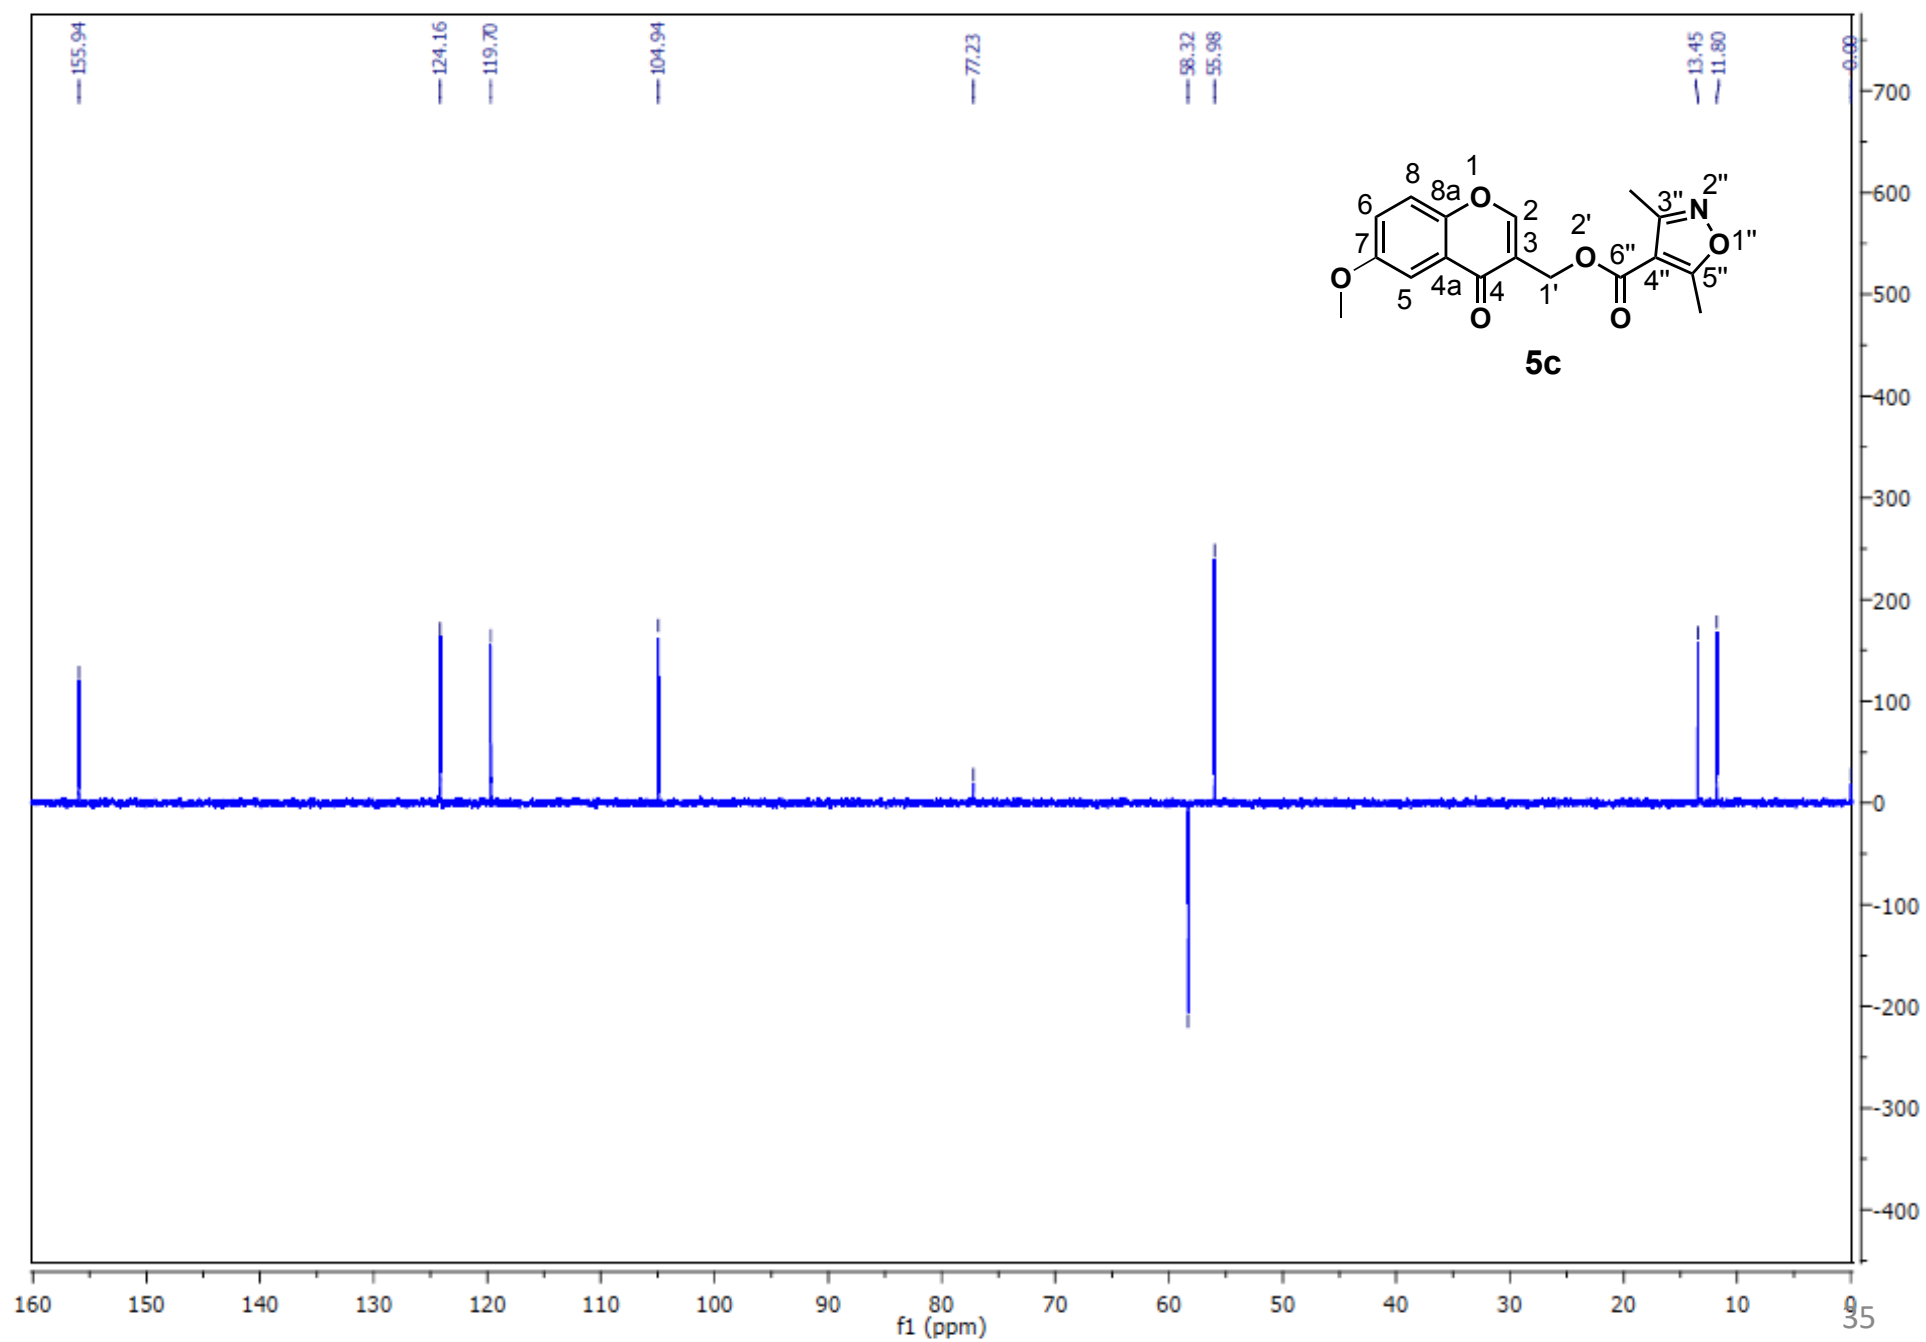

Figure S16.1.  $^1\text{H}$  NMR spectra of compound 5d

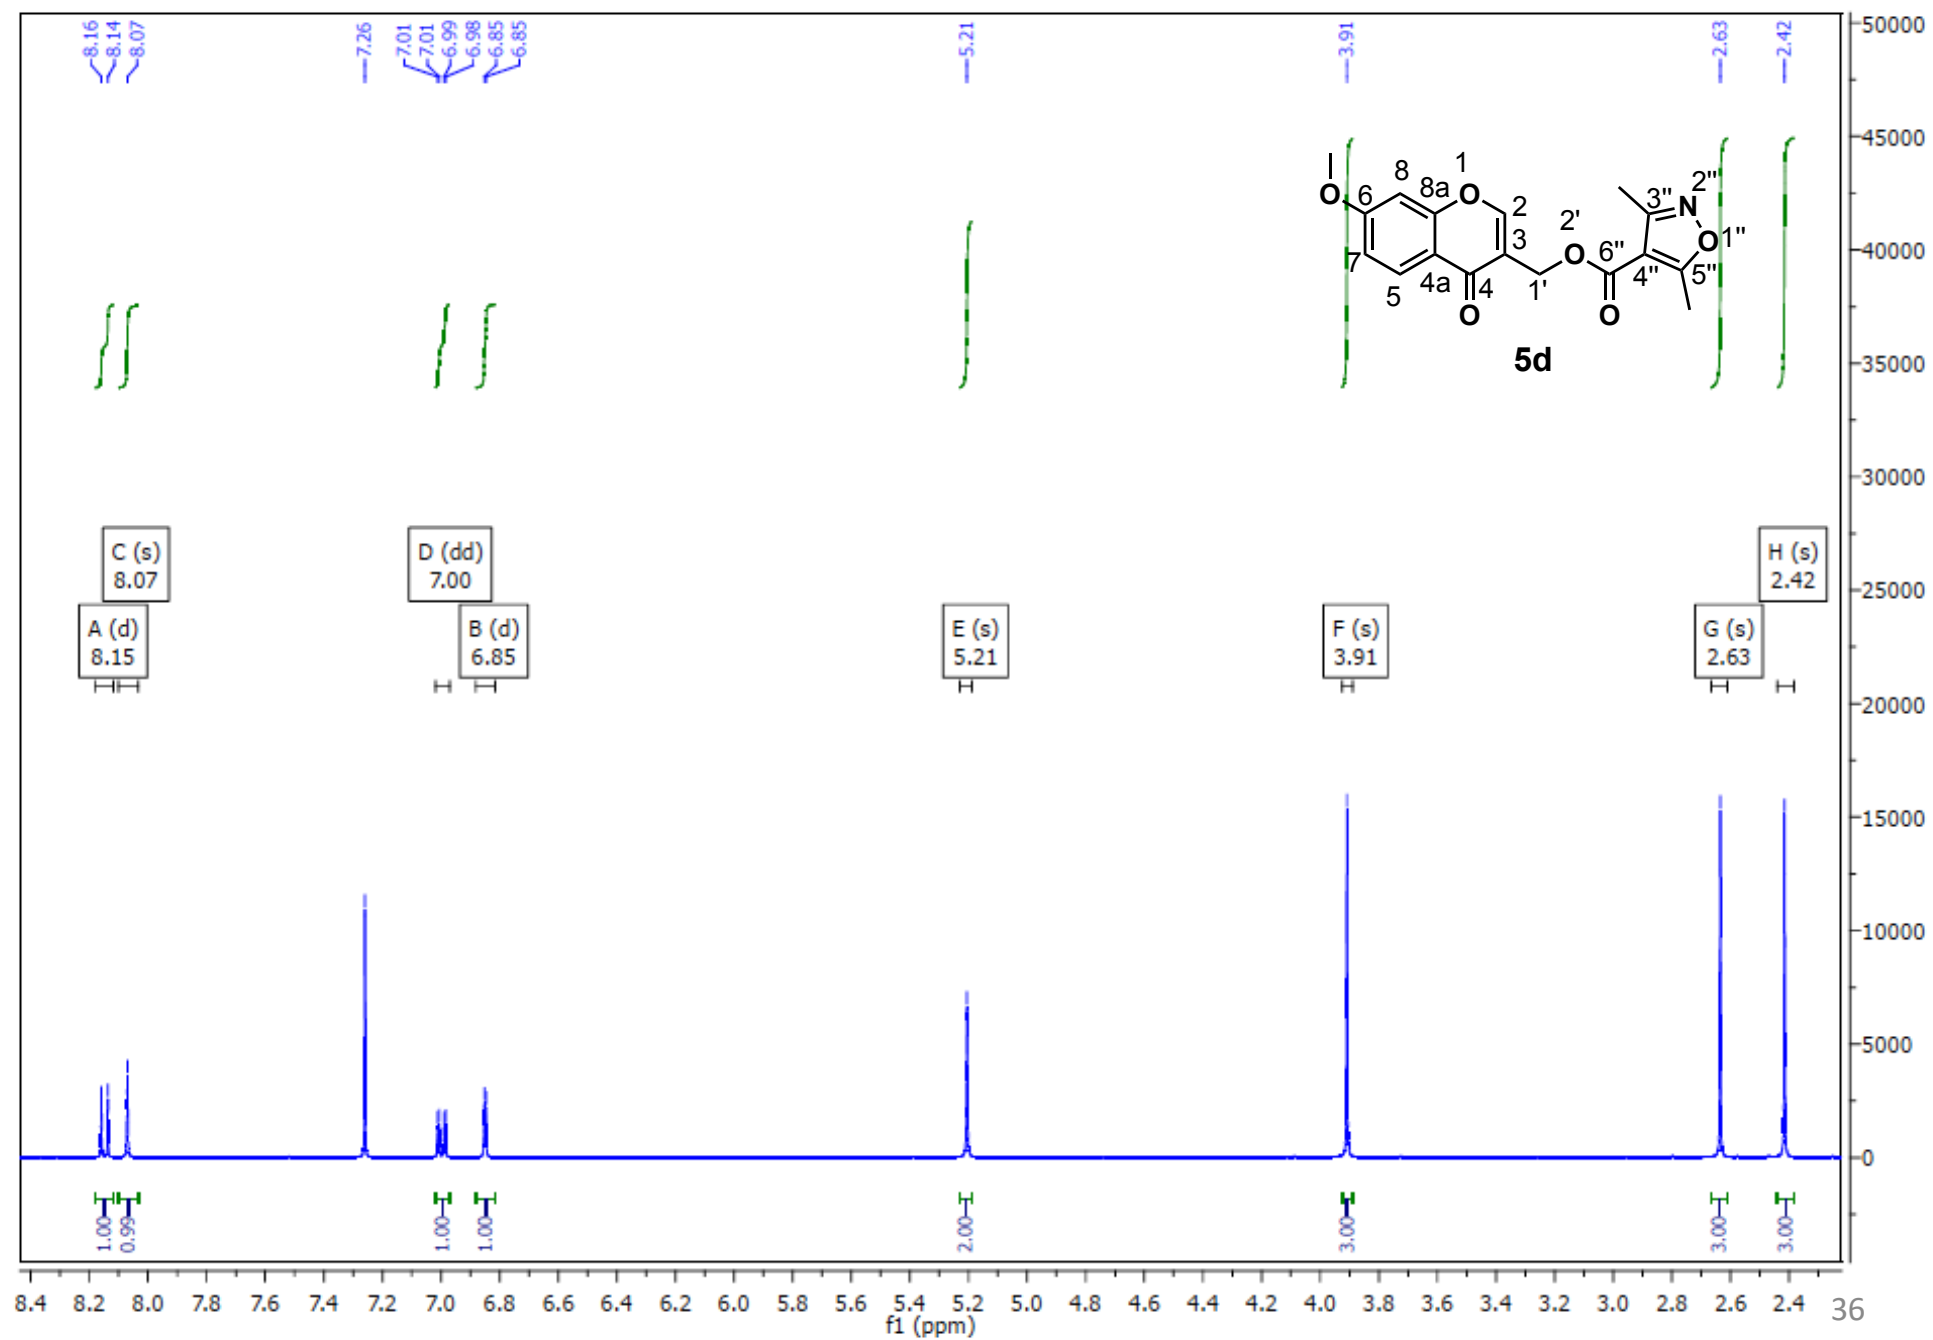

Figure S16.2.  $^{13}\text{C}$  NMR spectra of compound 5d

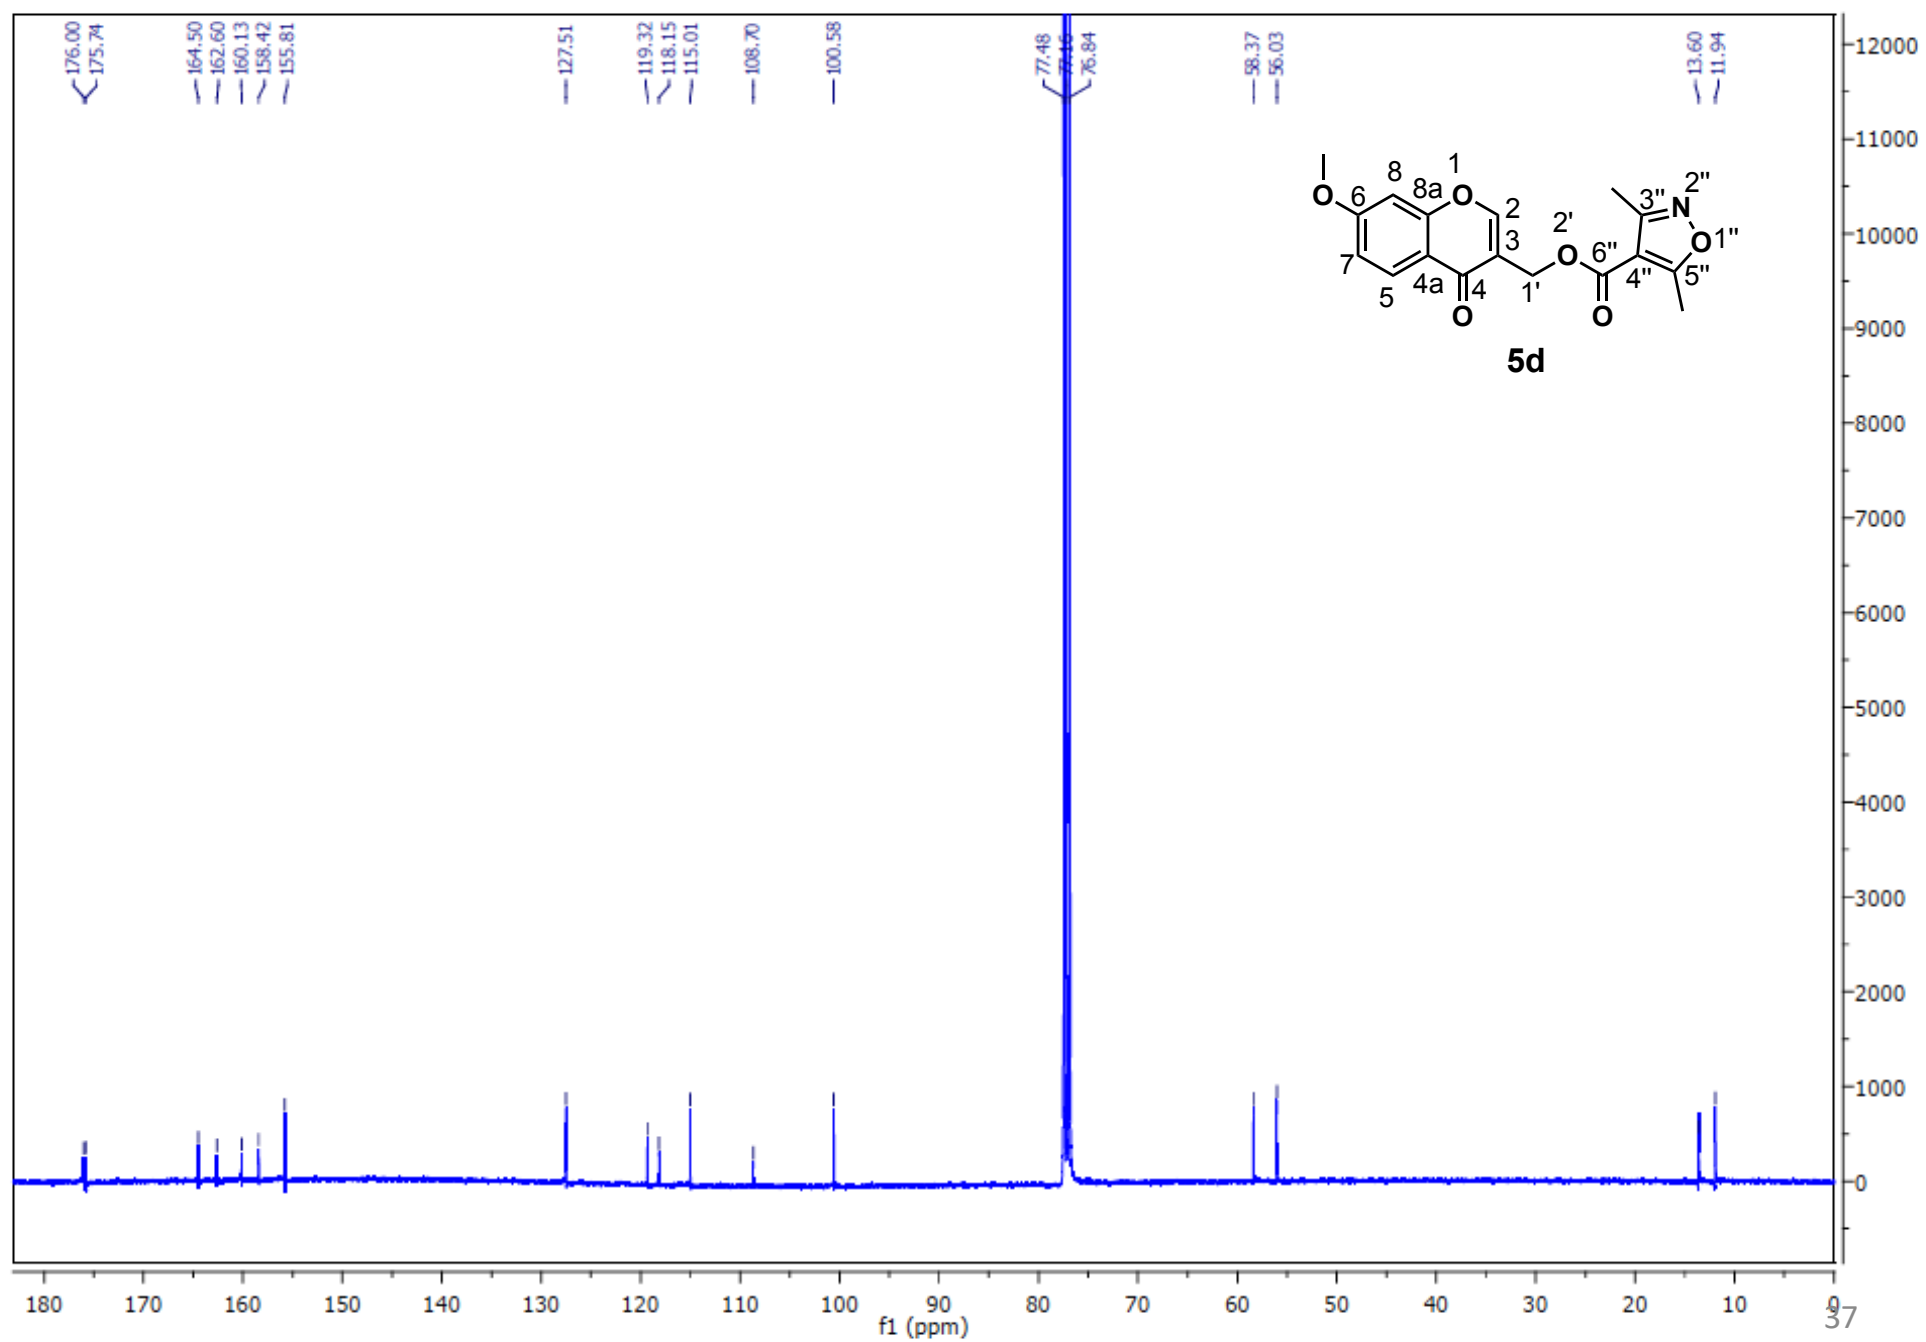

Figure S17.1.  $^1\text{H}$  NMR spectra of compound 6a

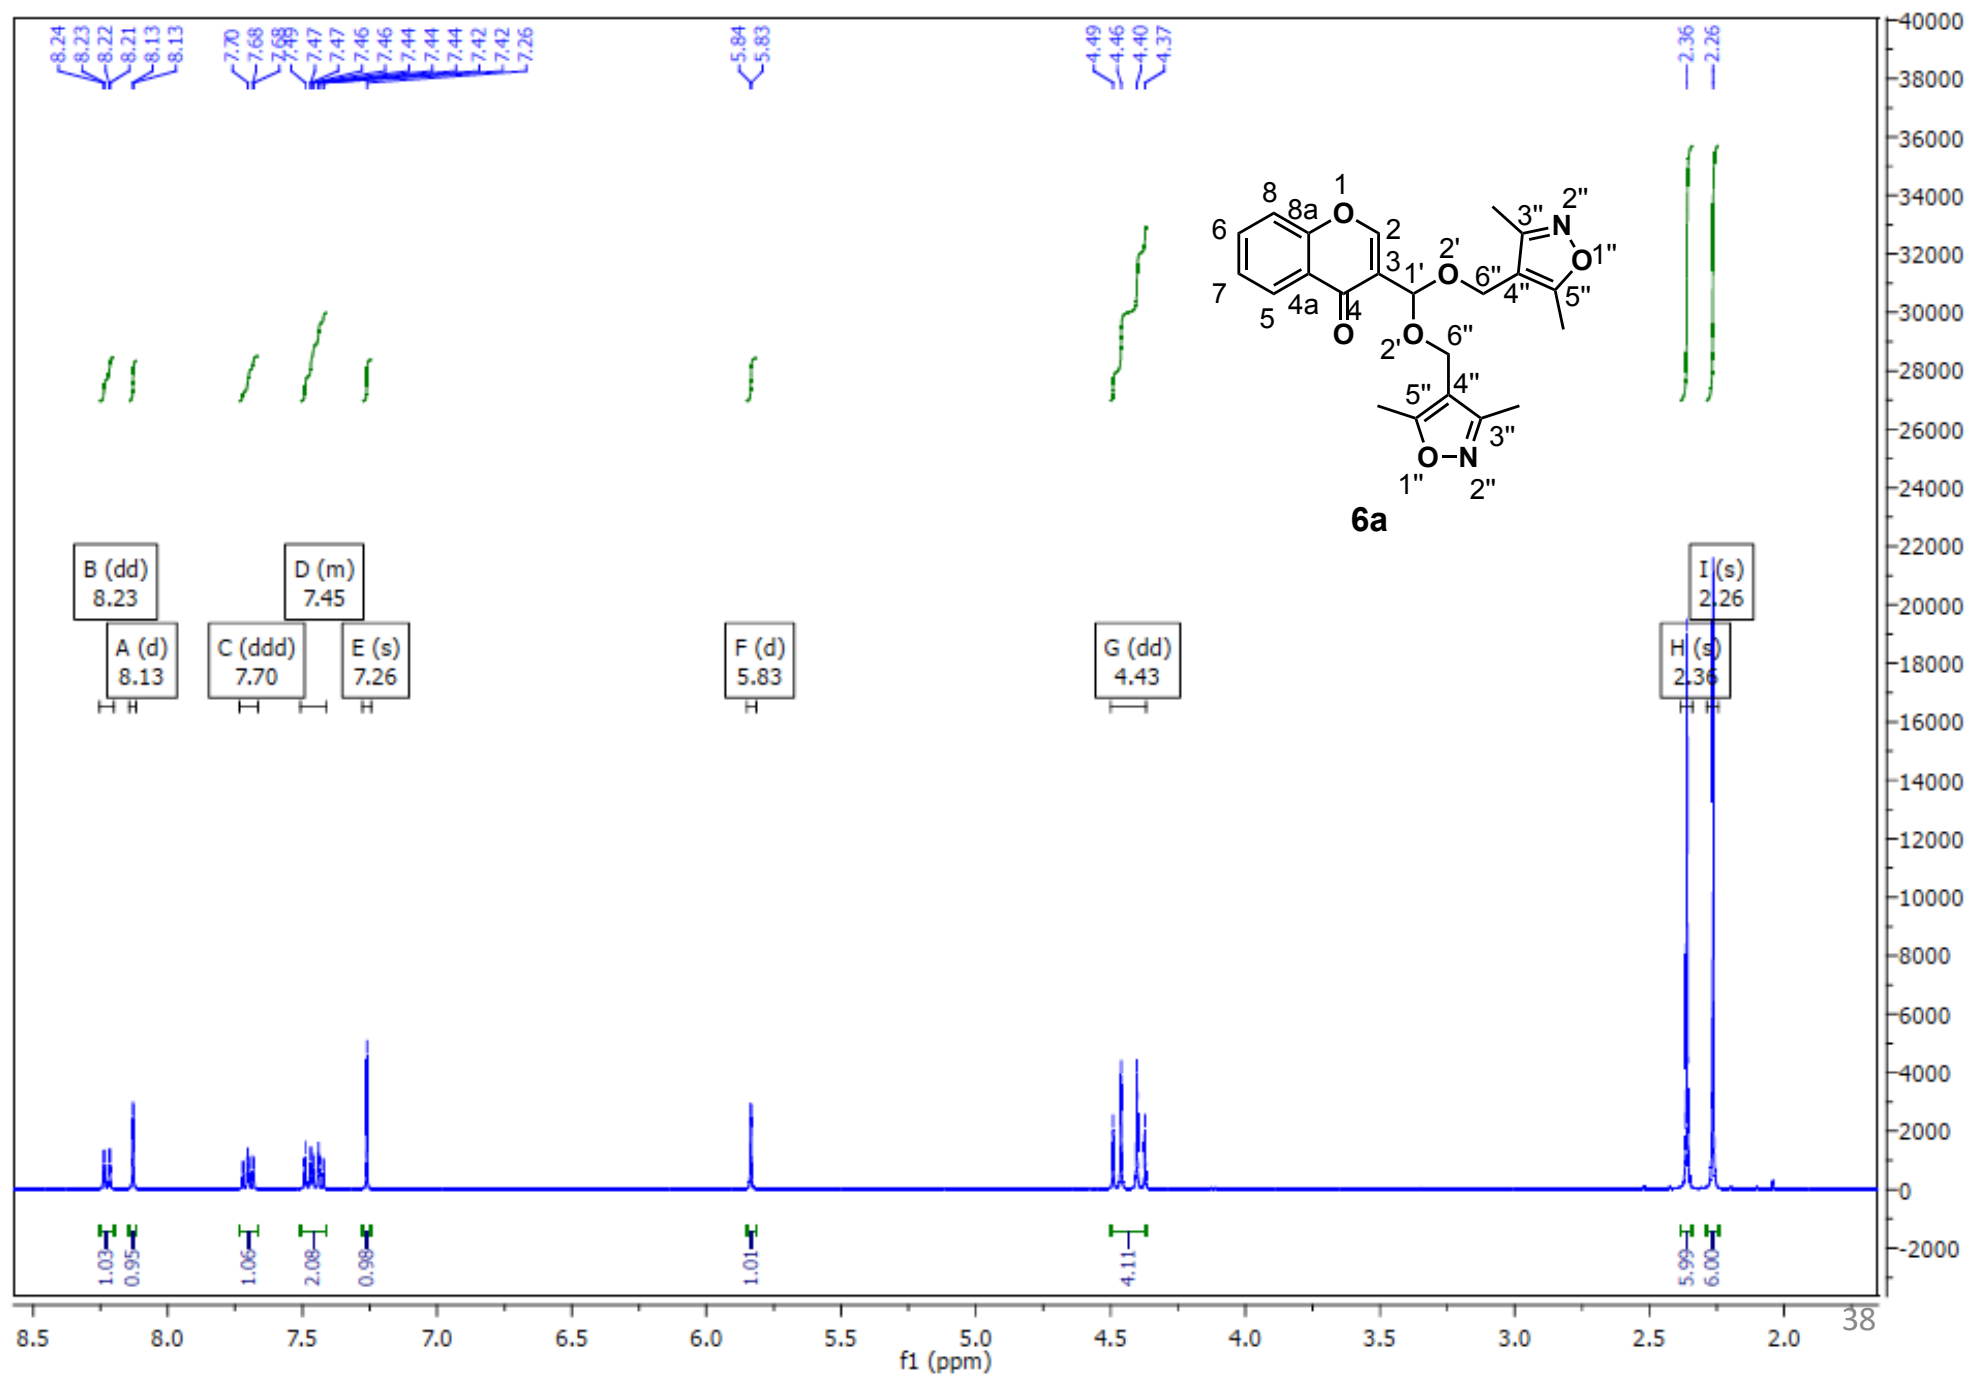

Figure S17.2.  $^{13}\text{C}$  NMR spectra of compound 6a

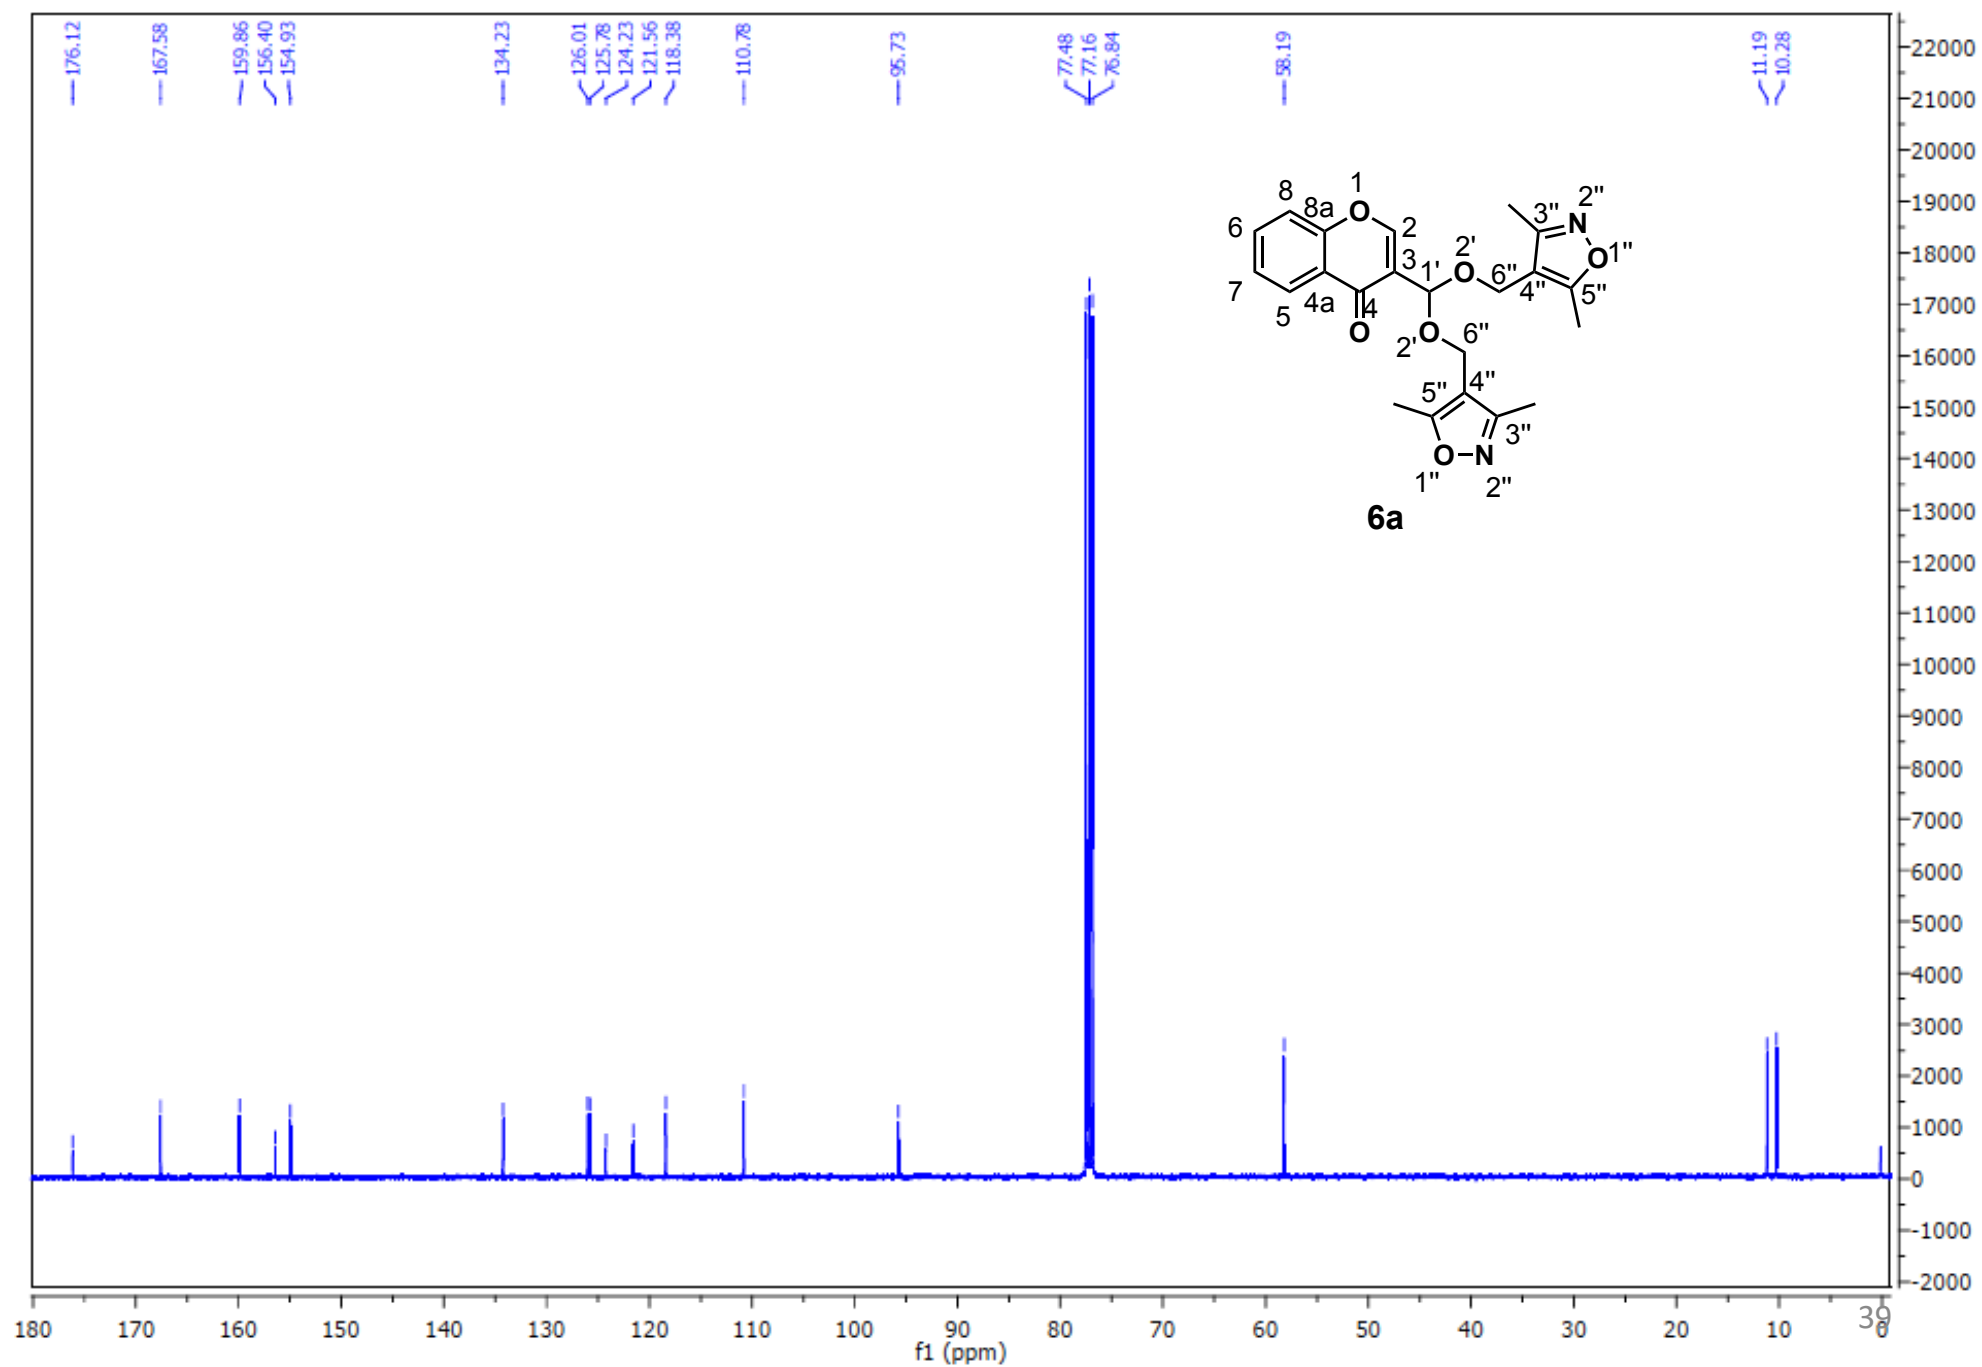

Figure S18.1.  $^1\text{H}$  NMR spectra of compound 6b

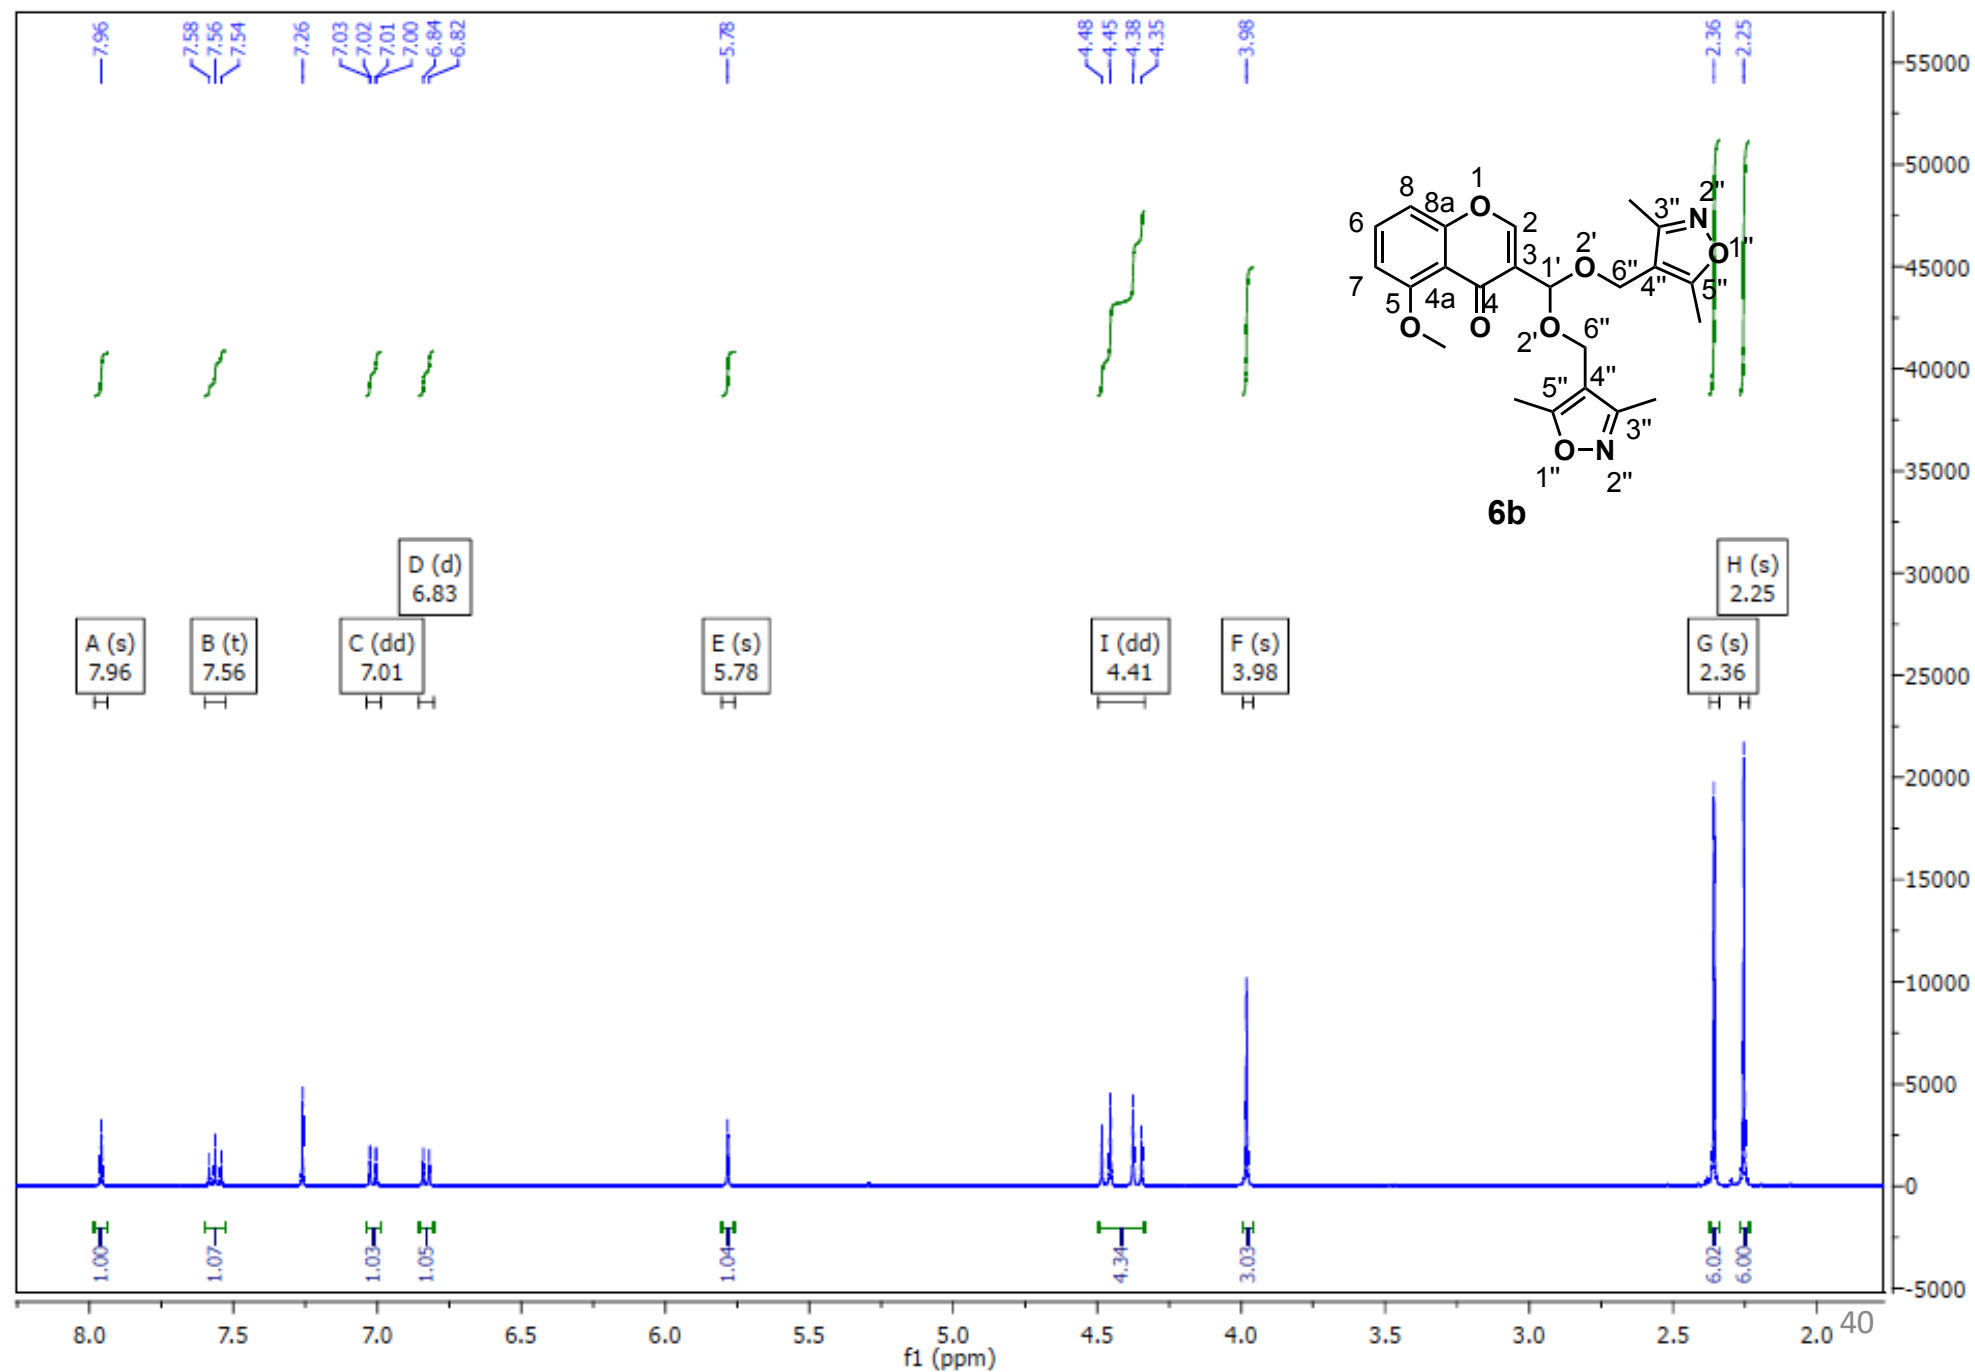



Figure S18.2.  $^{13}\text{C}$  NMR spectra of compound 6b

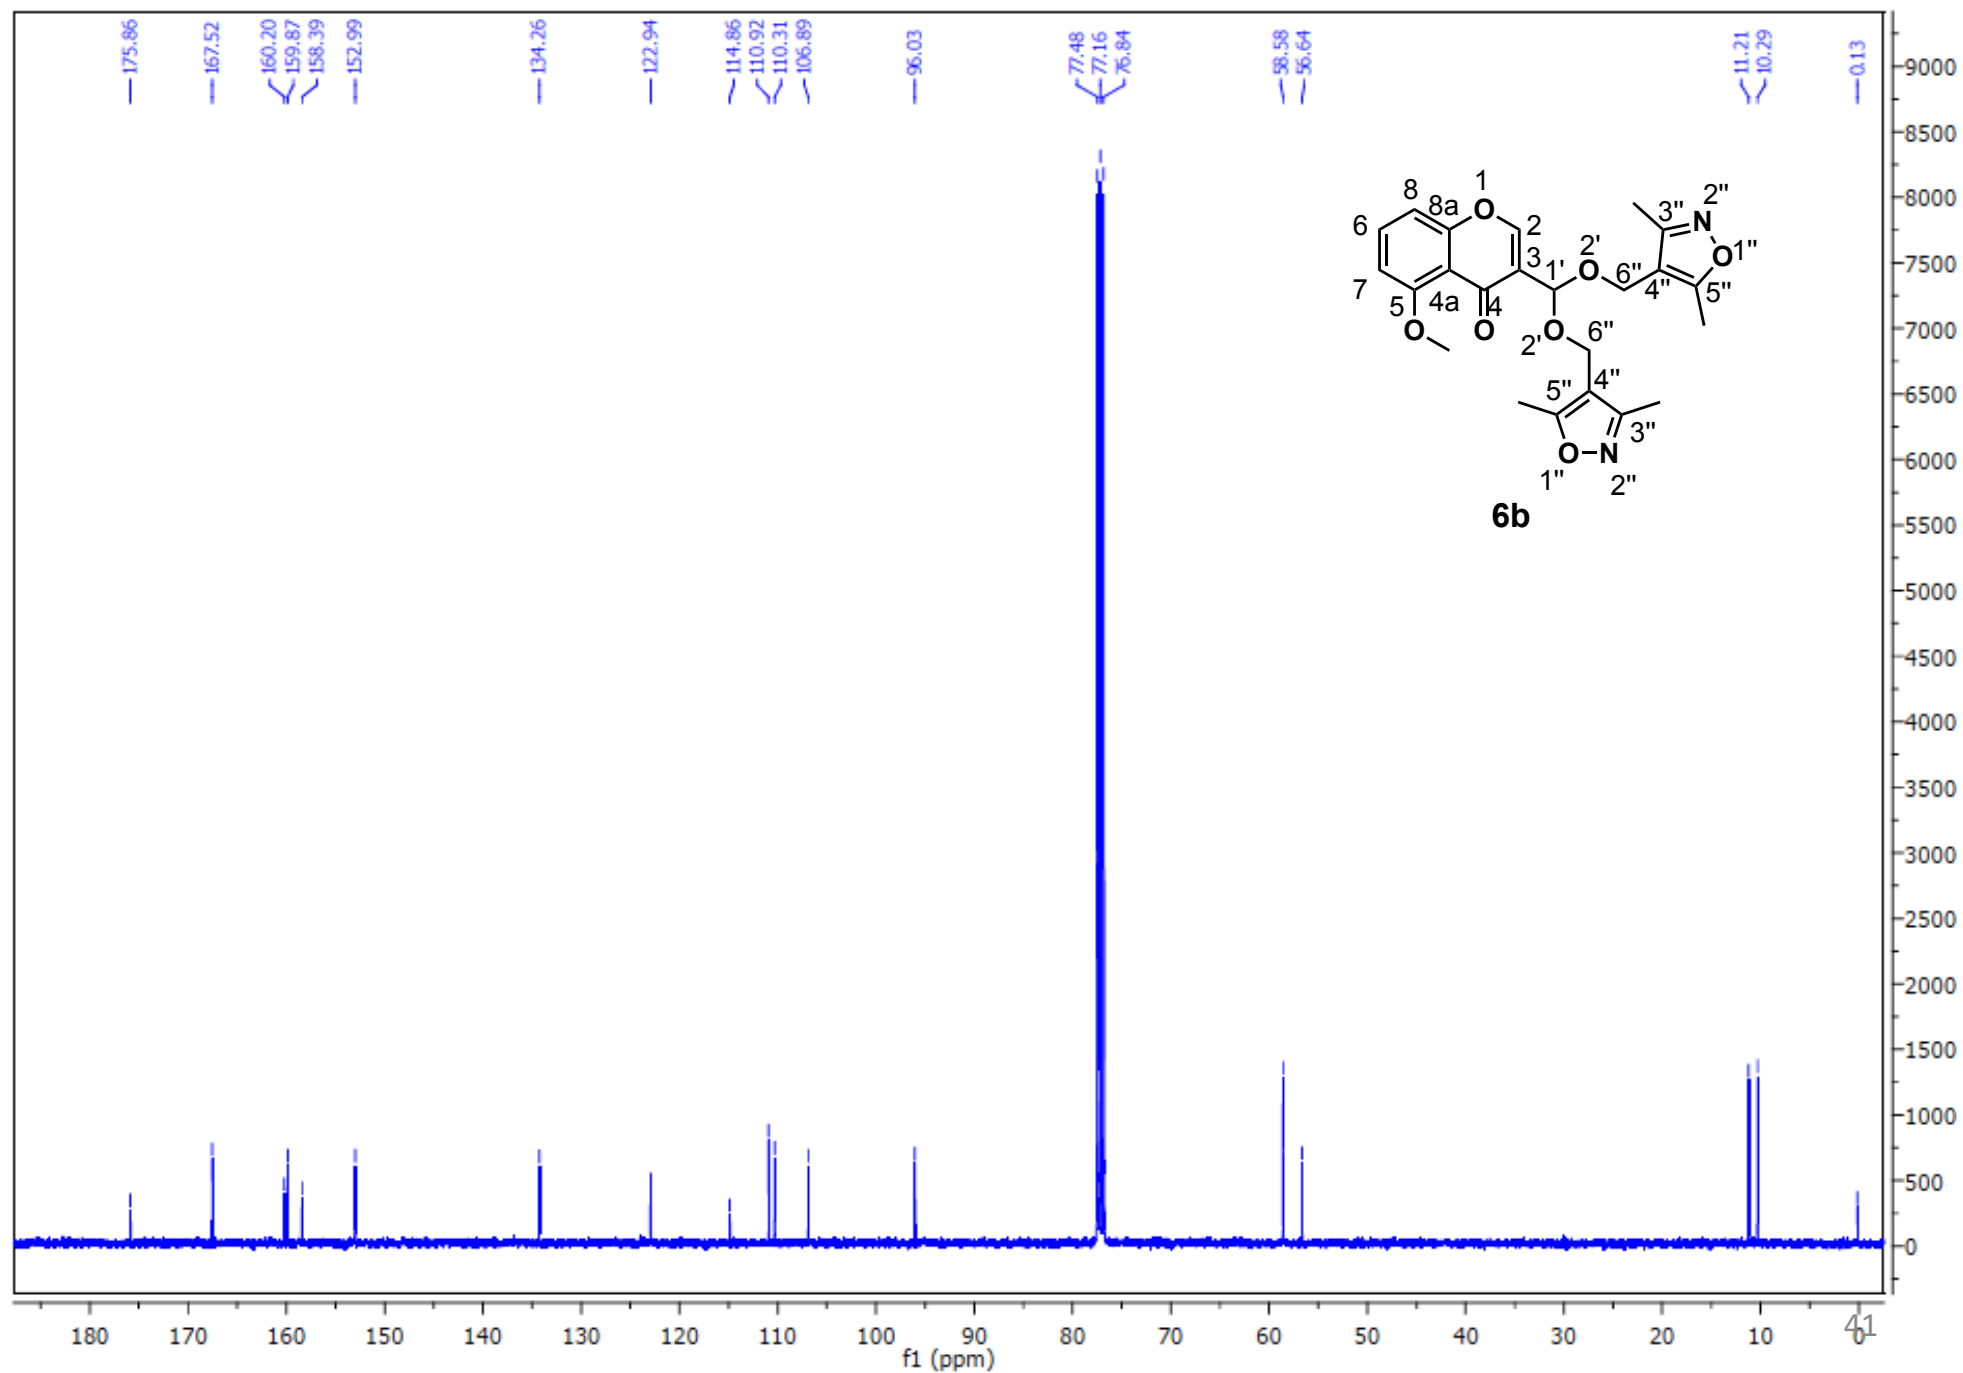

Figure S18.3.  $^{13}\text{C}$ -DEPT NMR spectra of compound 6b

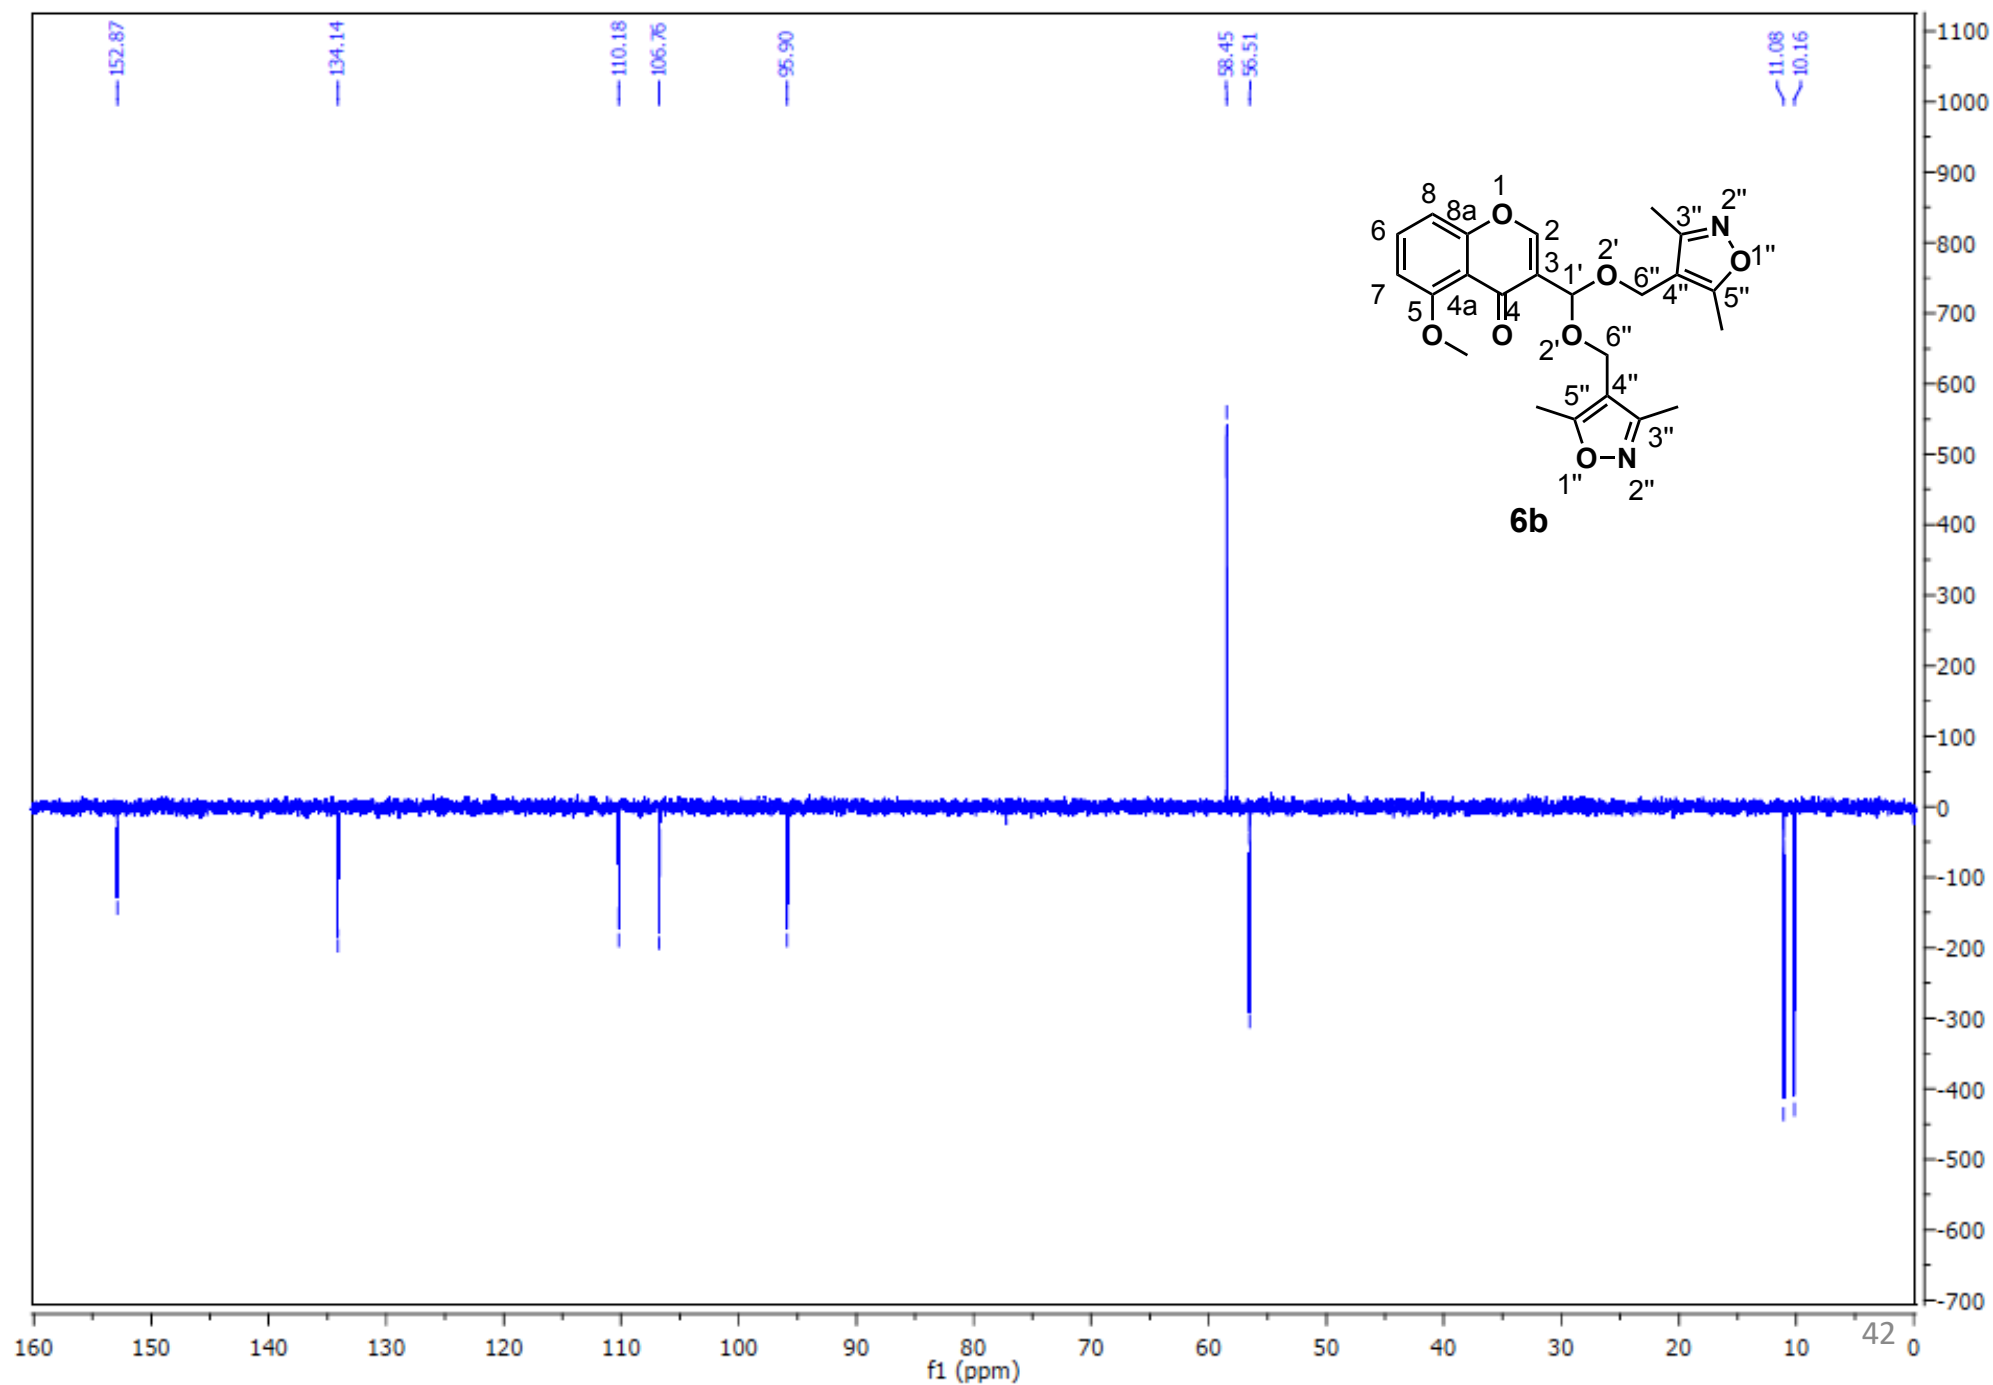

Figure S19.1.  $^1\text{H}$  NMR spectra of compound 6d

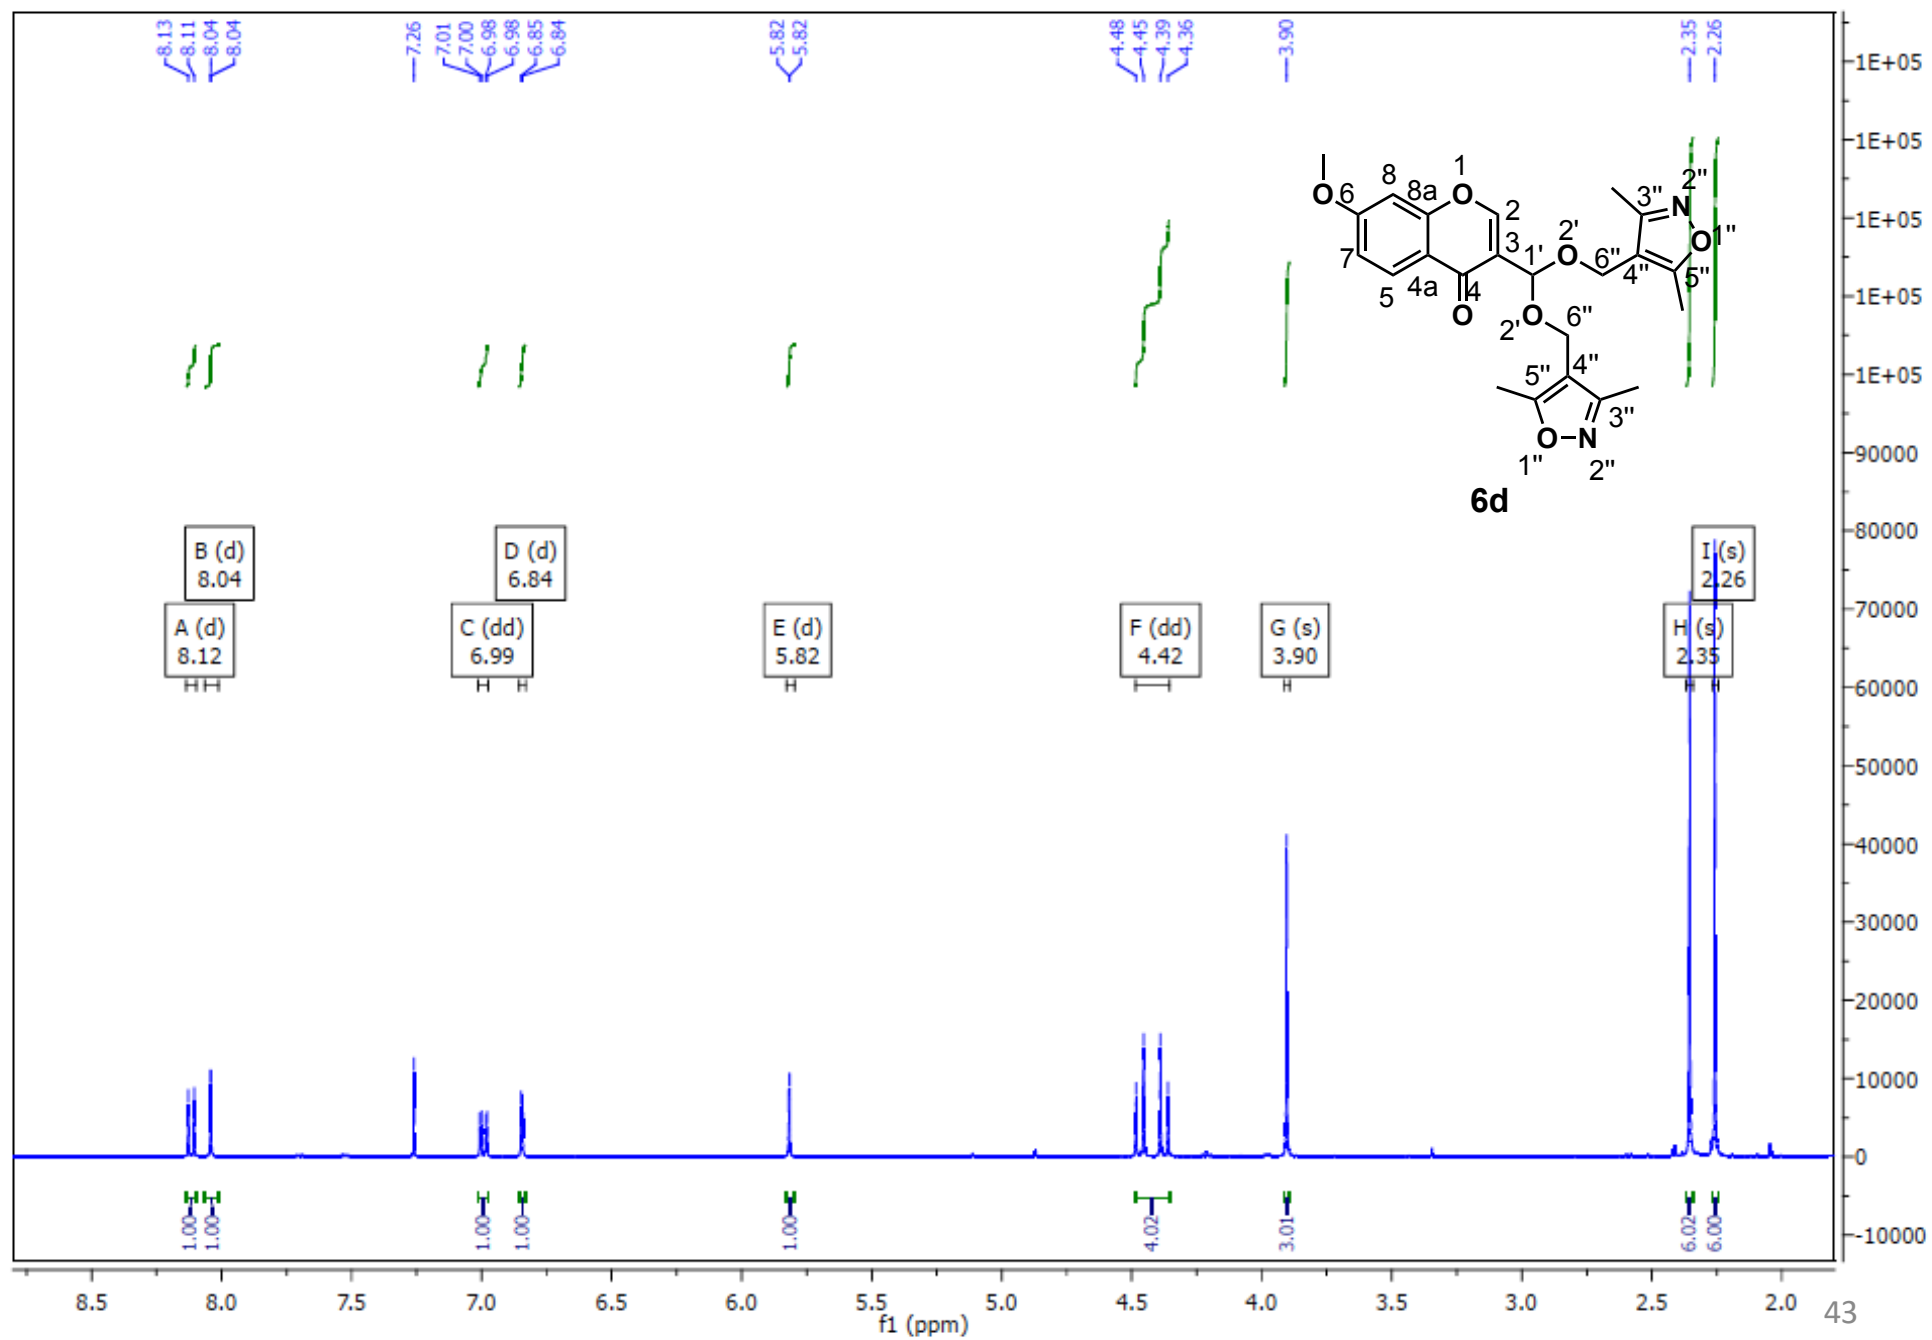

Figure S19.2.  $^{13}\text{C}$  NMR spectra of compound 6d

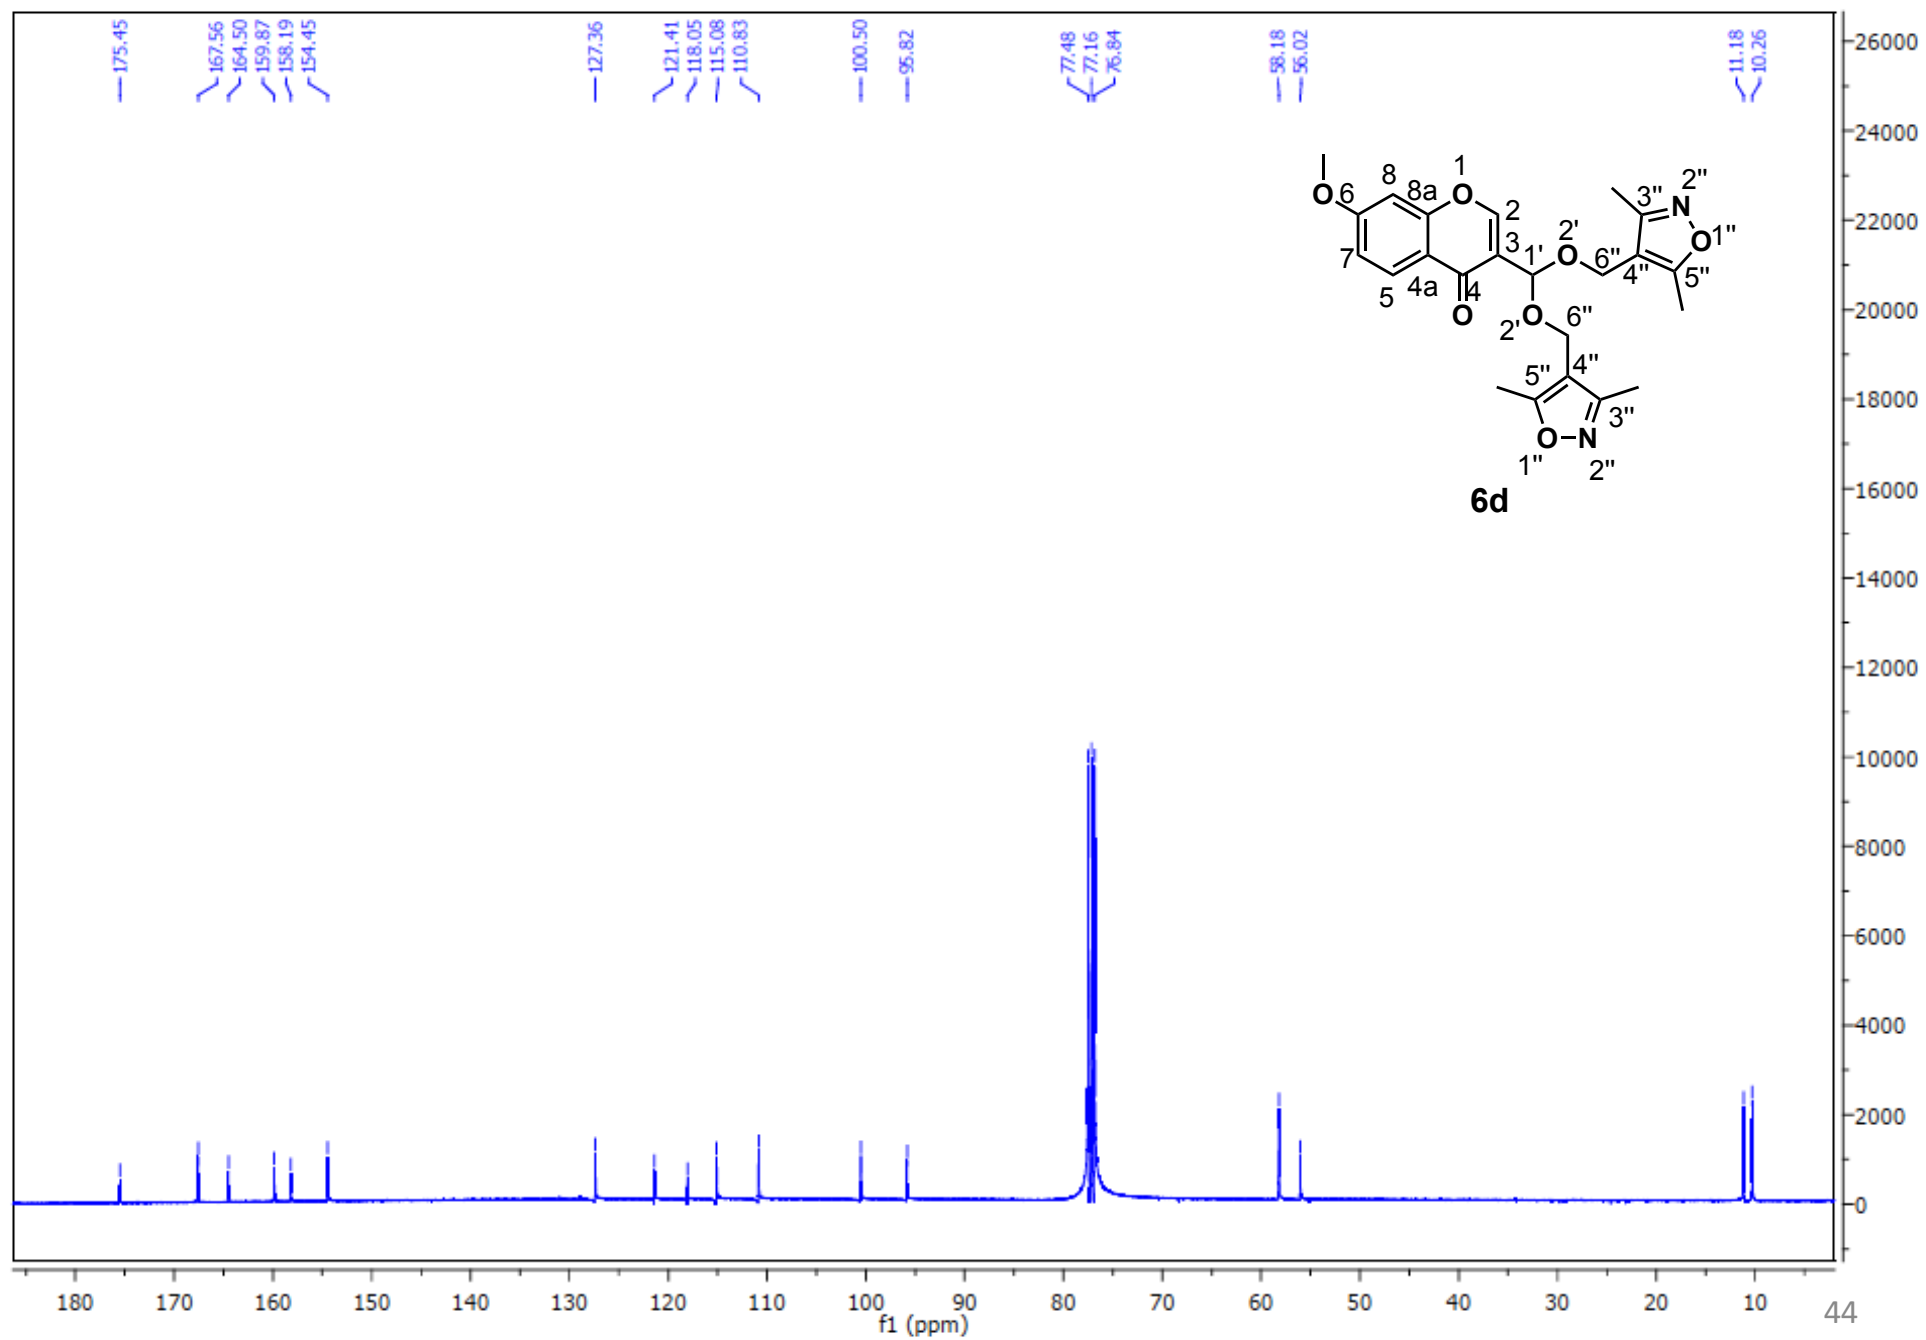

Figure S19.3.  $^{13}\text{C}$ -DEPT NMR spectra of compound 6d

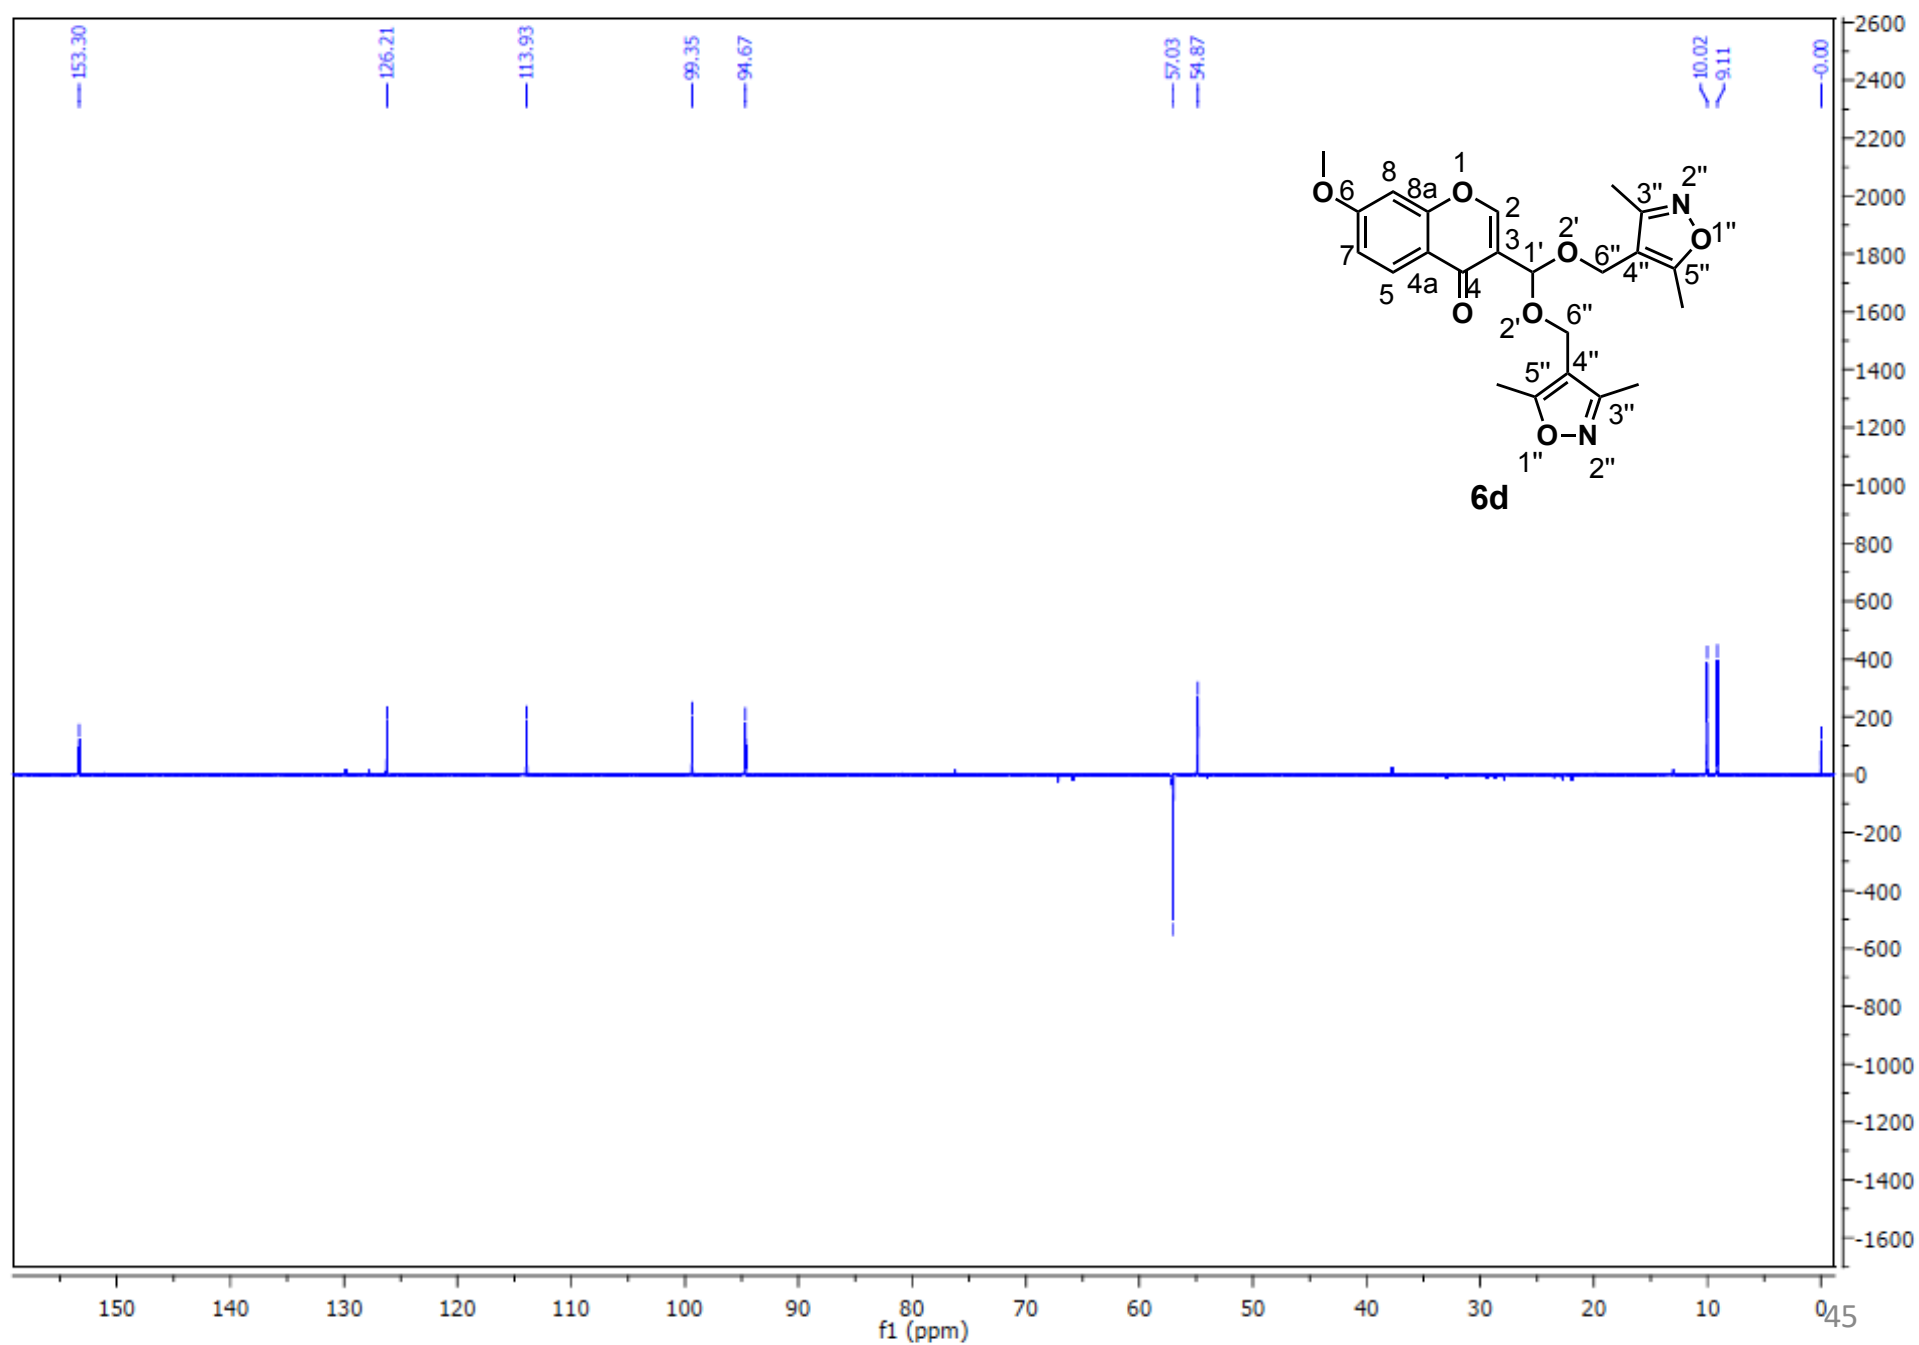

Figure S20.1.  $^1\text{H}$  NMR spectra of compound 7a

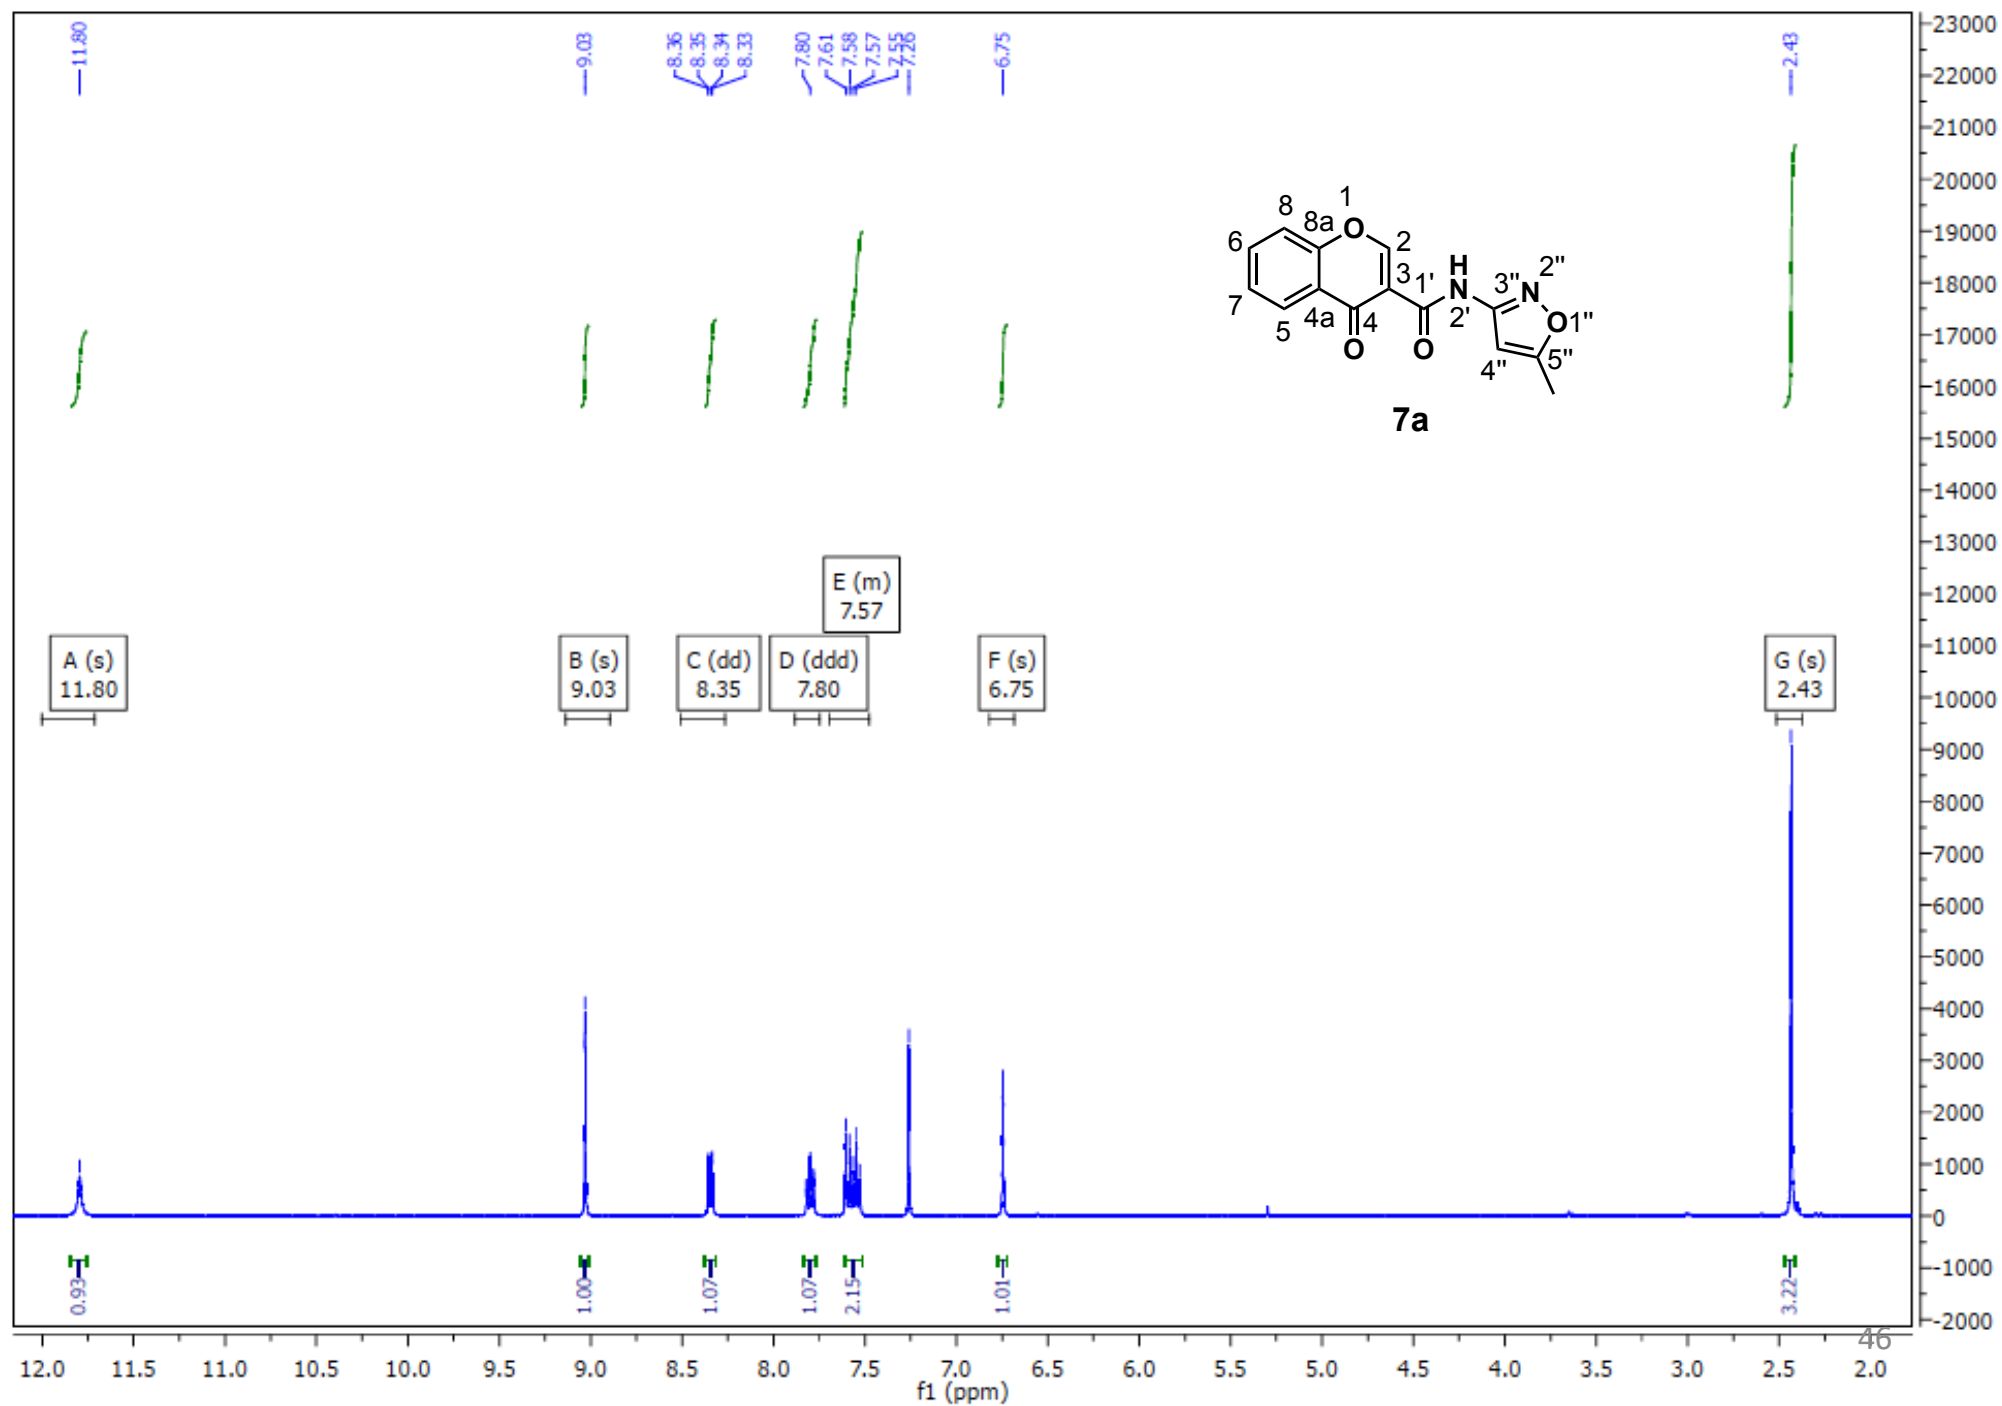

Figure S20.2.  $^{13}\text{C}$  NMR spectra of compound 7a

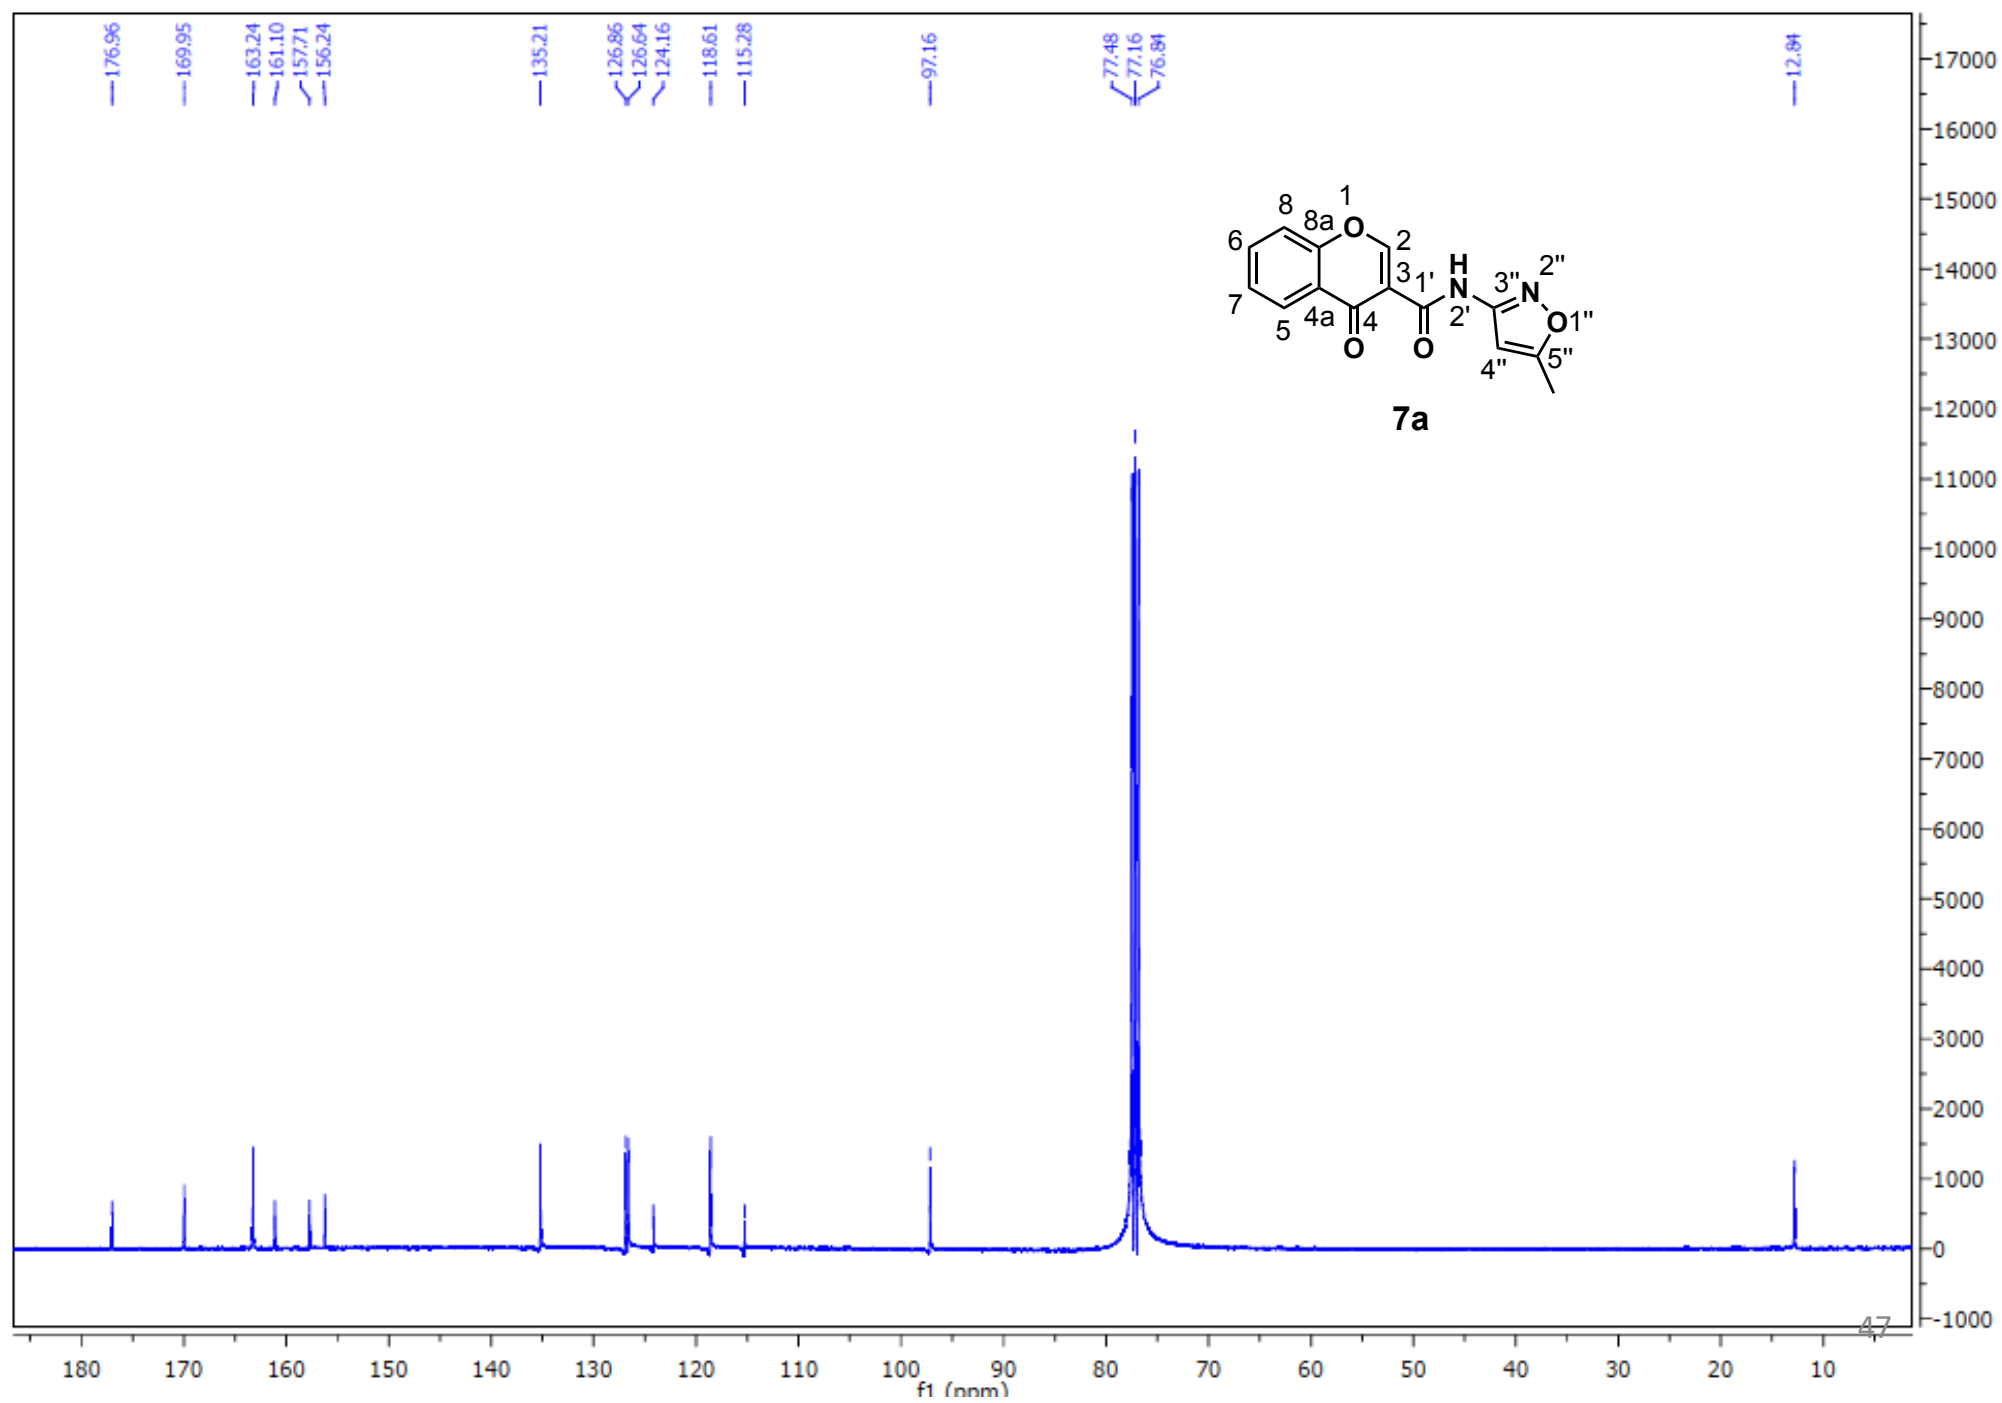

Figure S20.3.  $^{13}\text{C}$ -DEPT NMR spectra of compound 7a

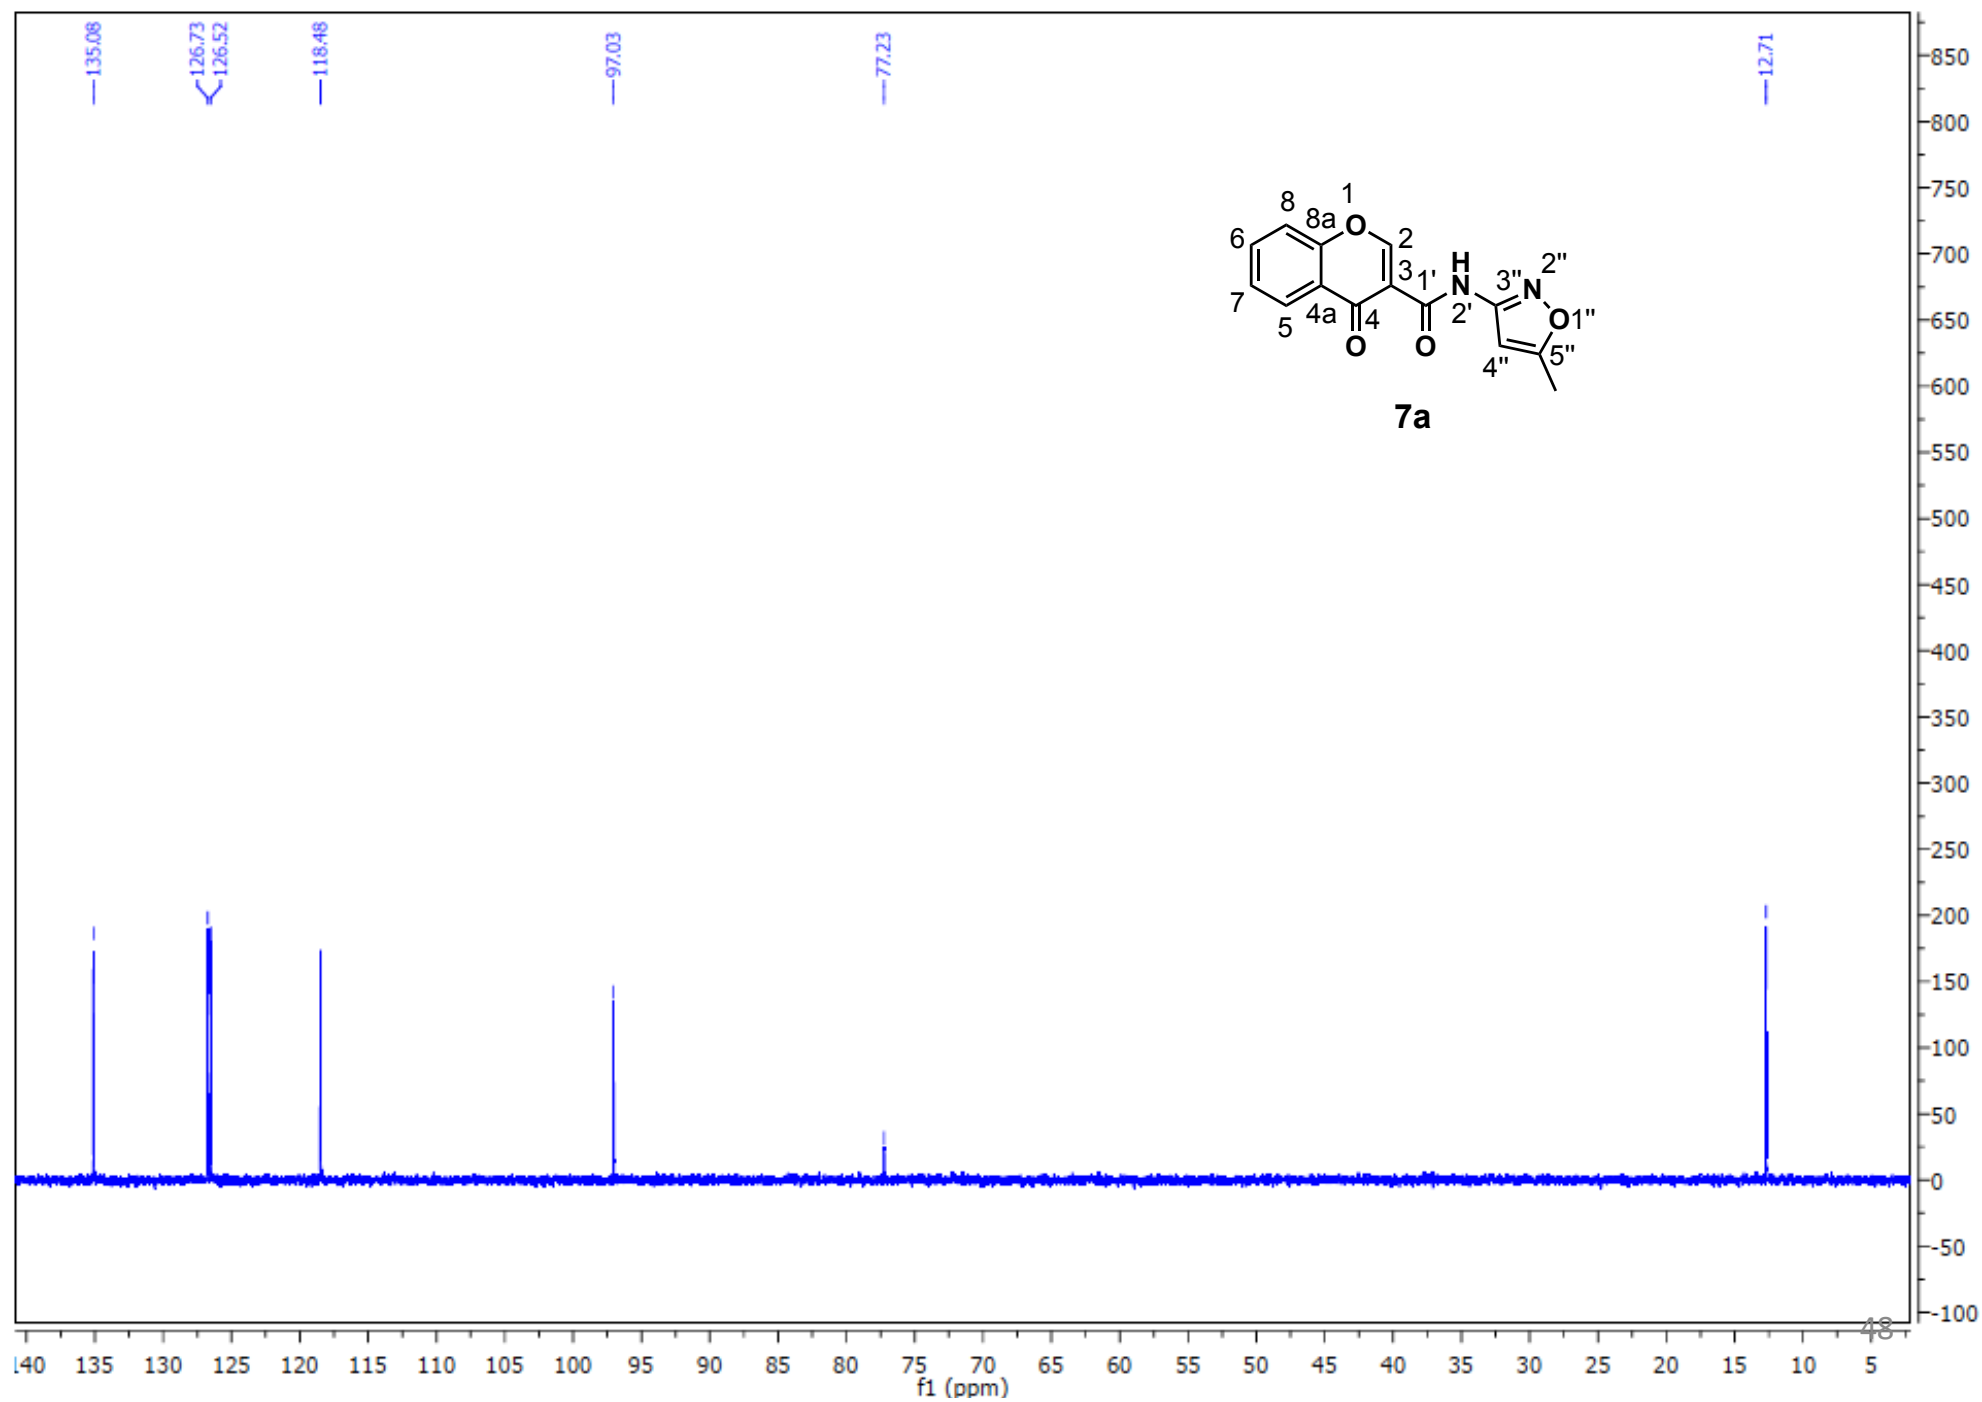



Figure S21.1.  $^1\text{H}$  NMR spectra of compound 7c

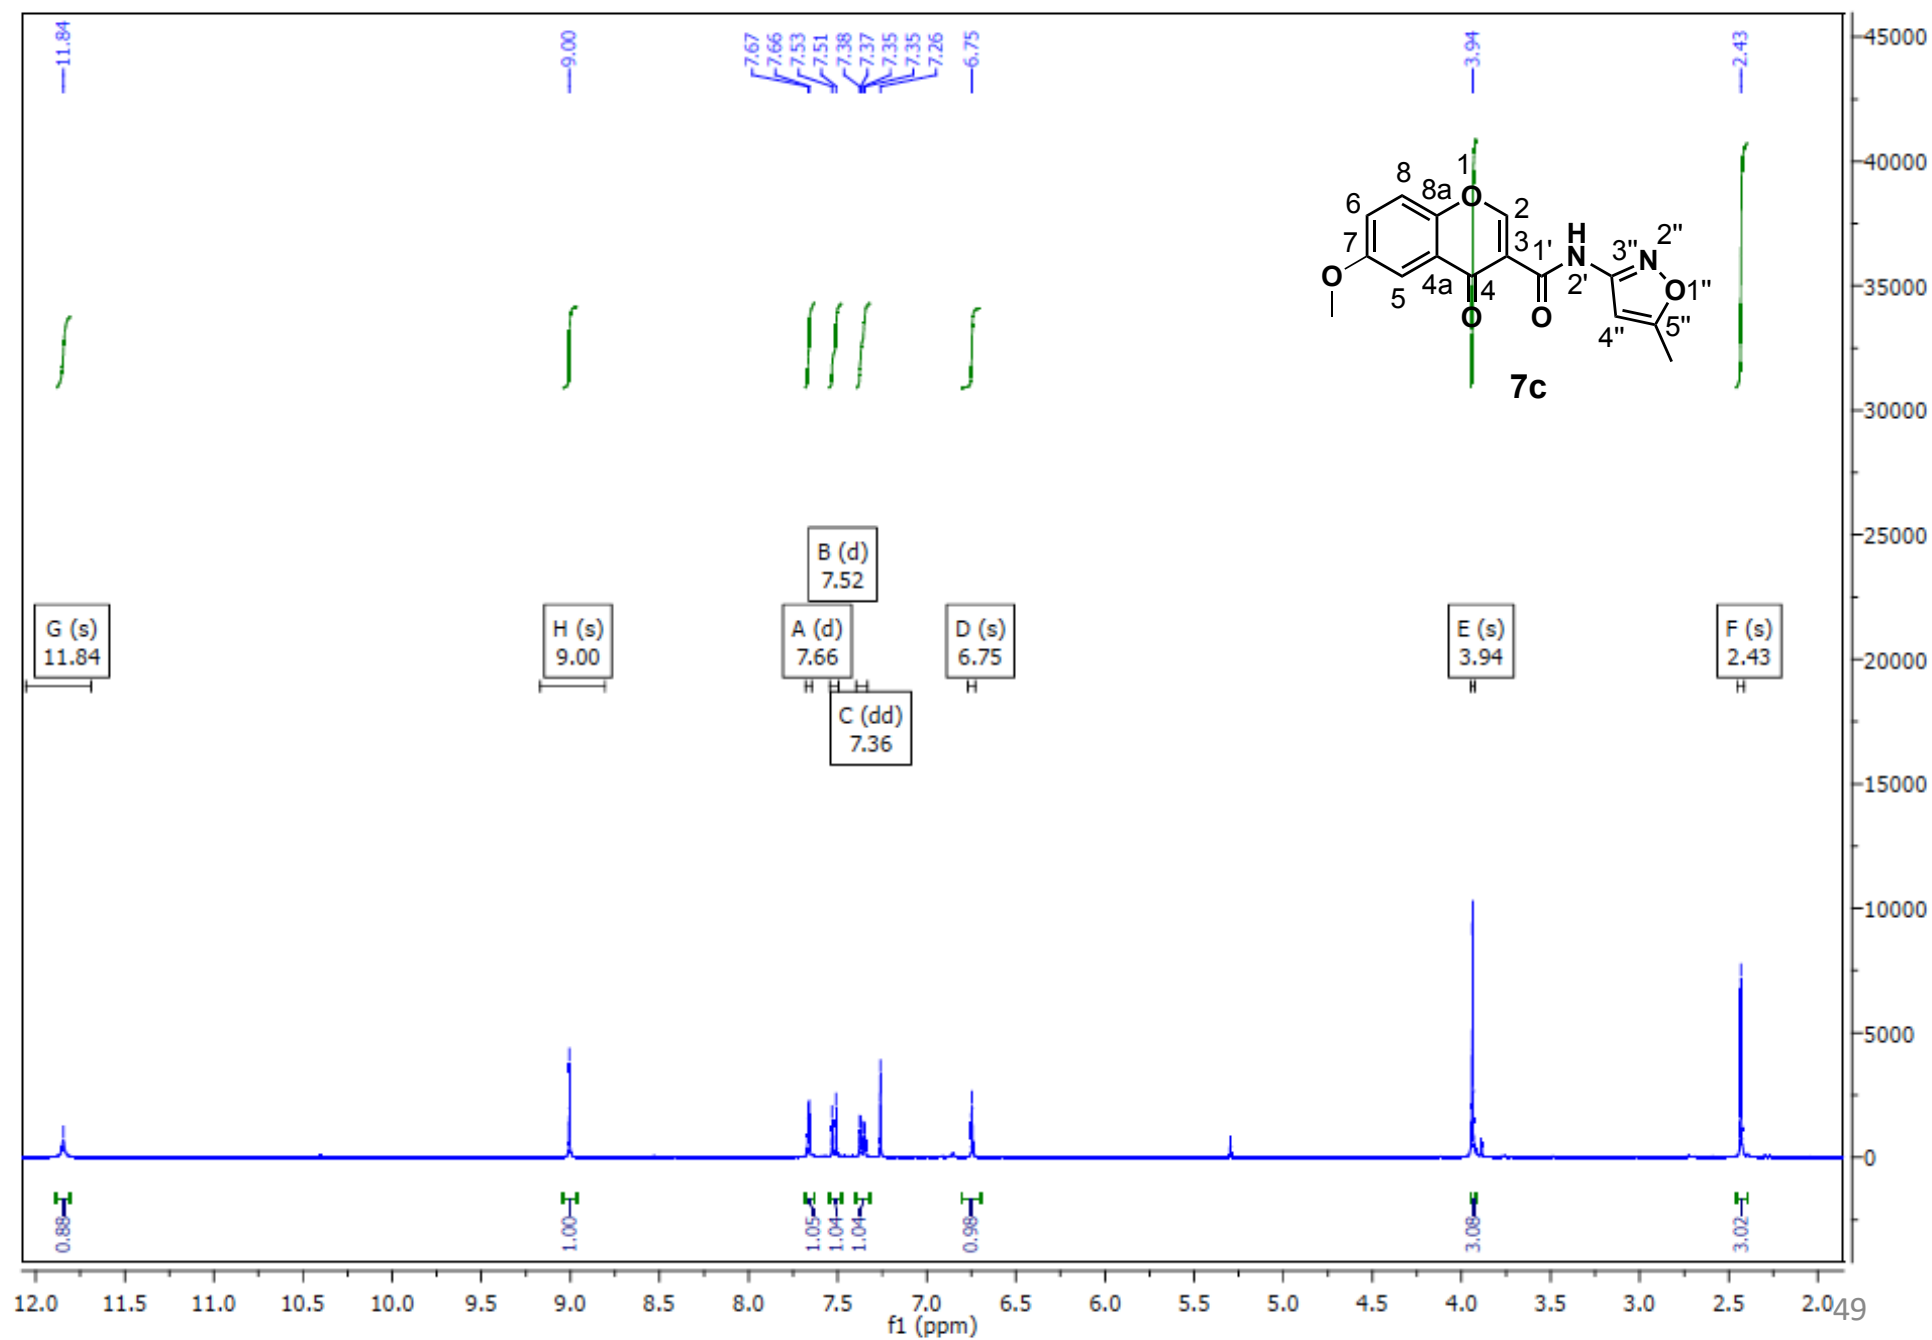

Figure S21.2.  $^{13}\text{C}$  NMR spectra of compound 7c

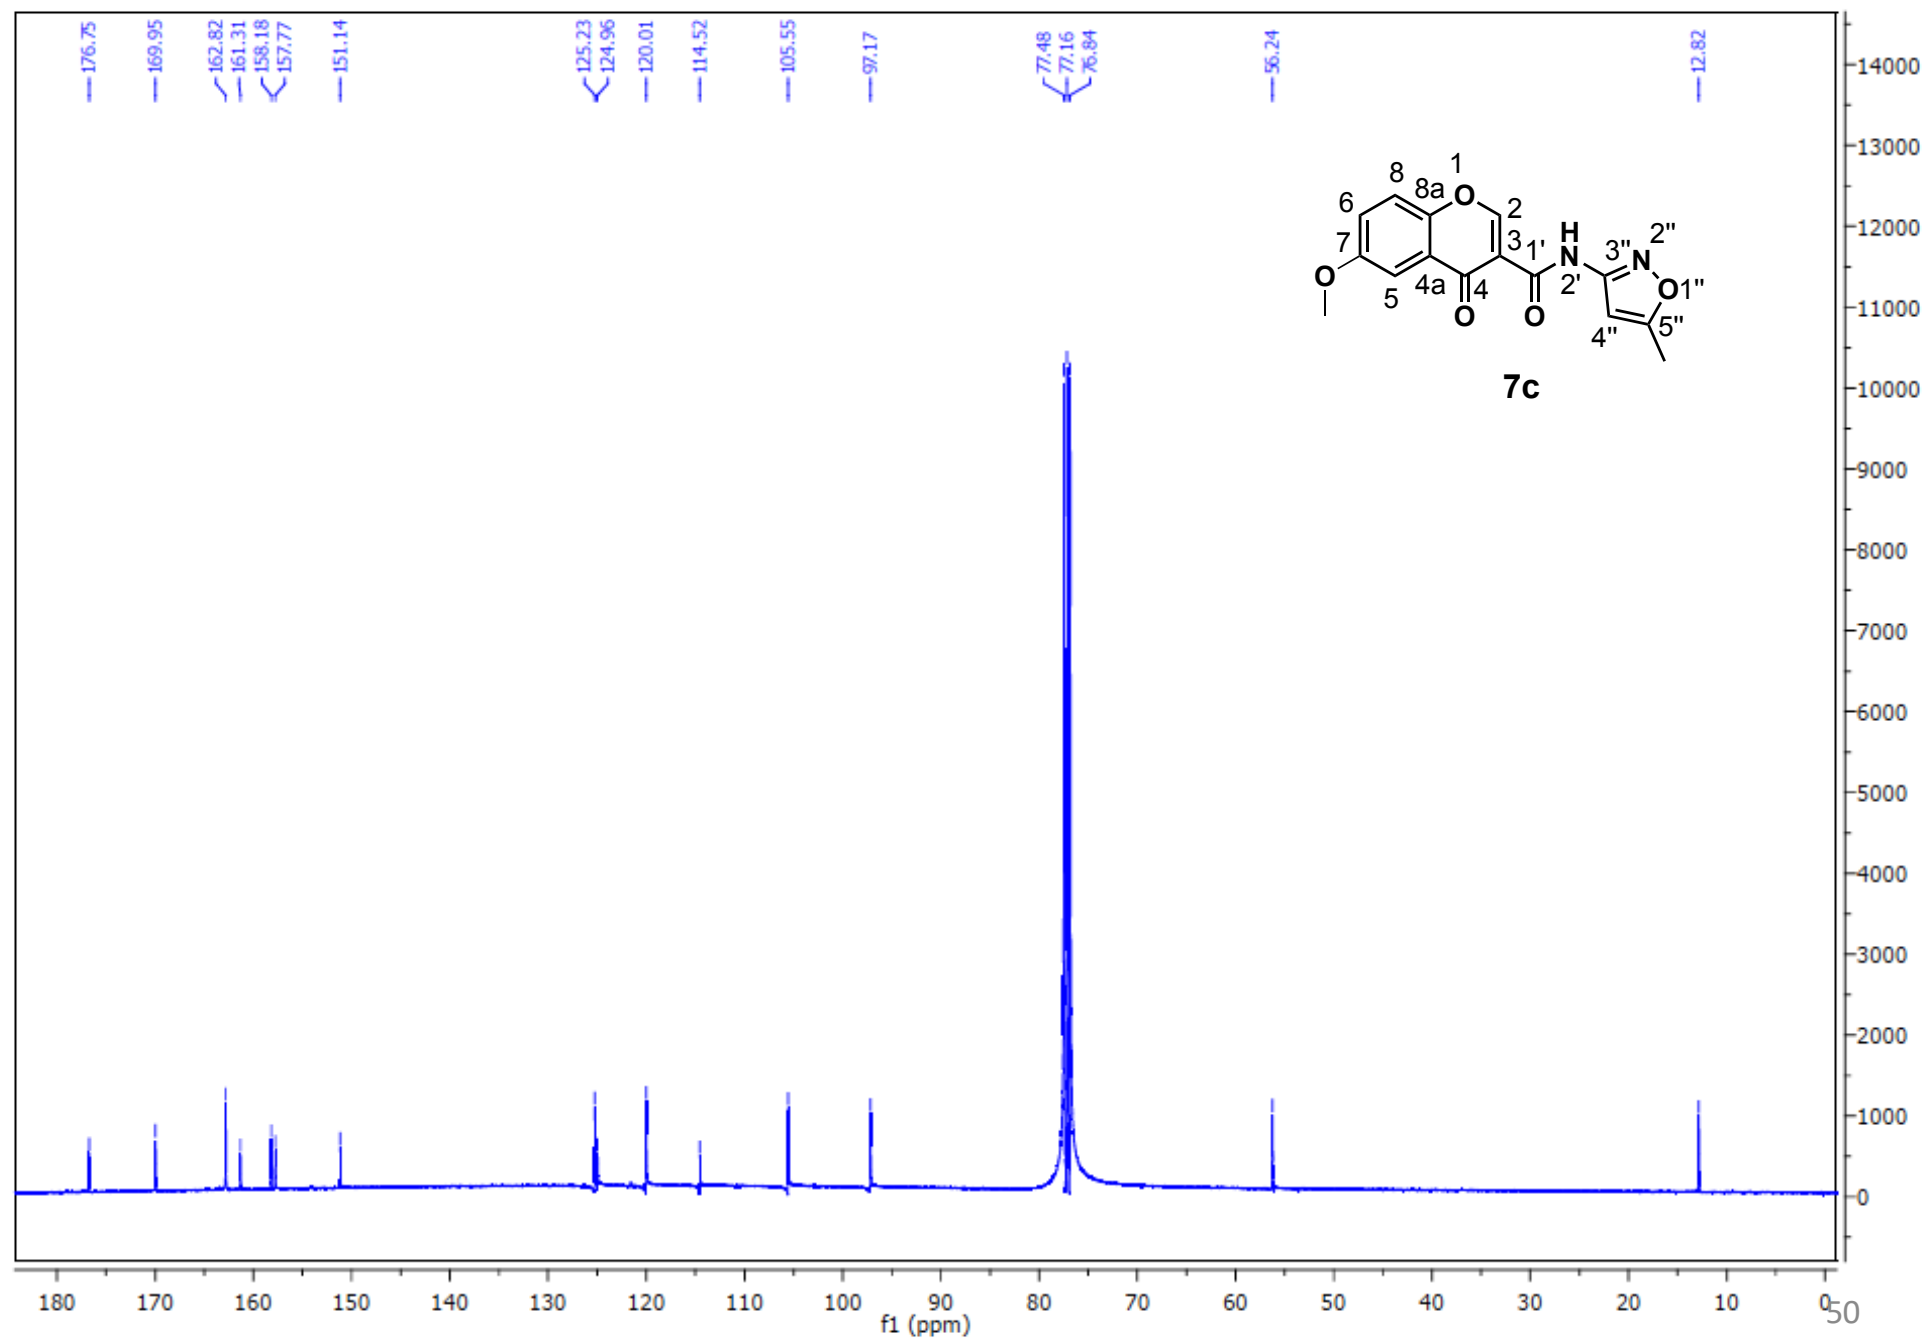

Figure S21.3.  $^{13}\text{C}$ -DEPT NMR spectra of compound 7c

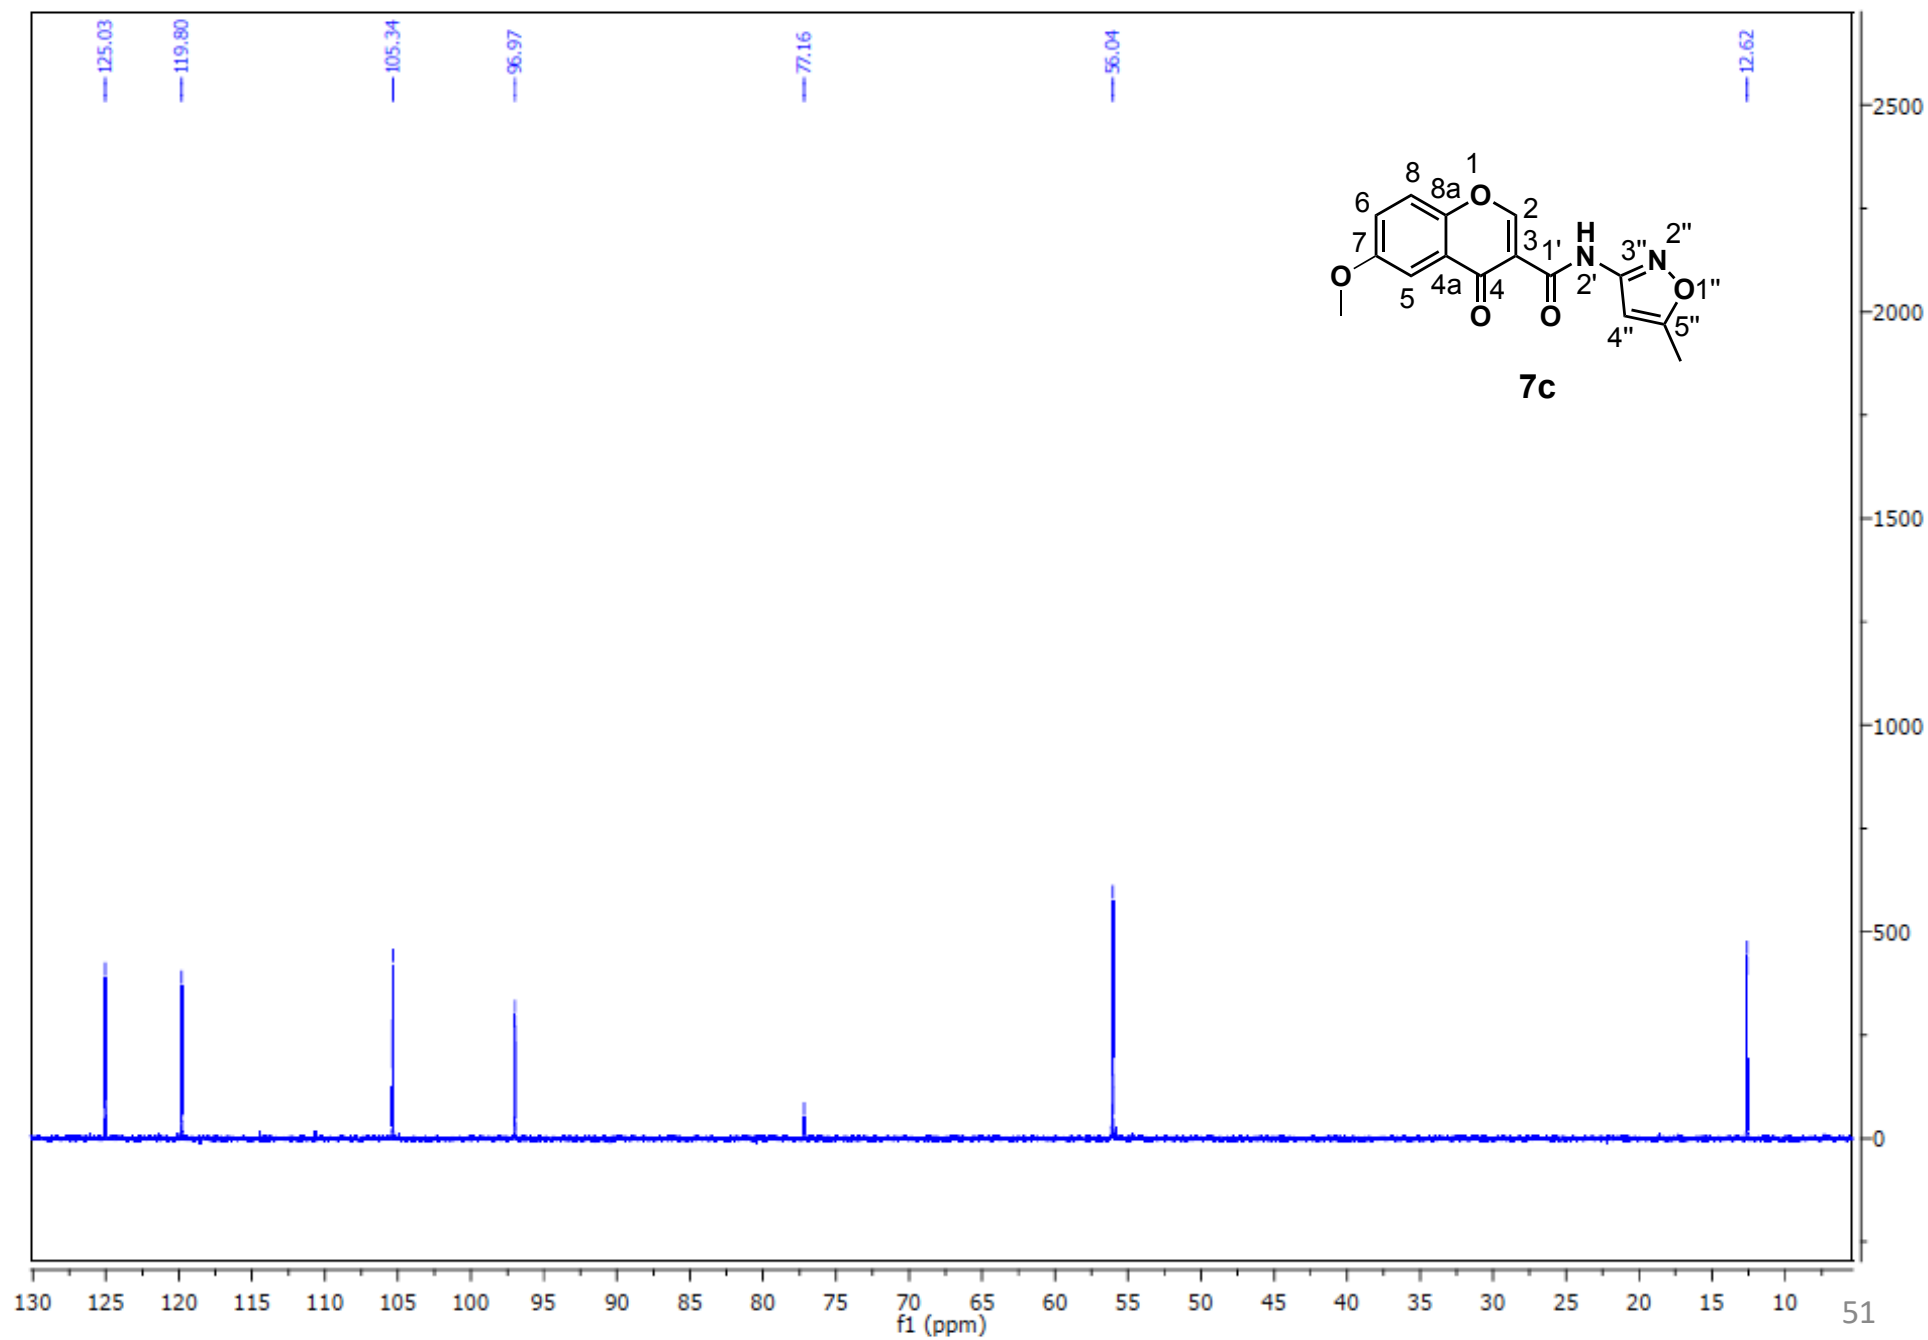

Figure S22.1.  $^1\text{H}$  NMR spectra of compound 7d

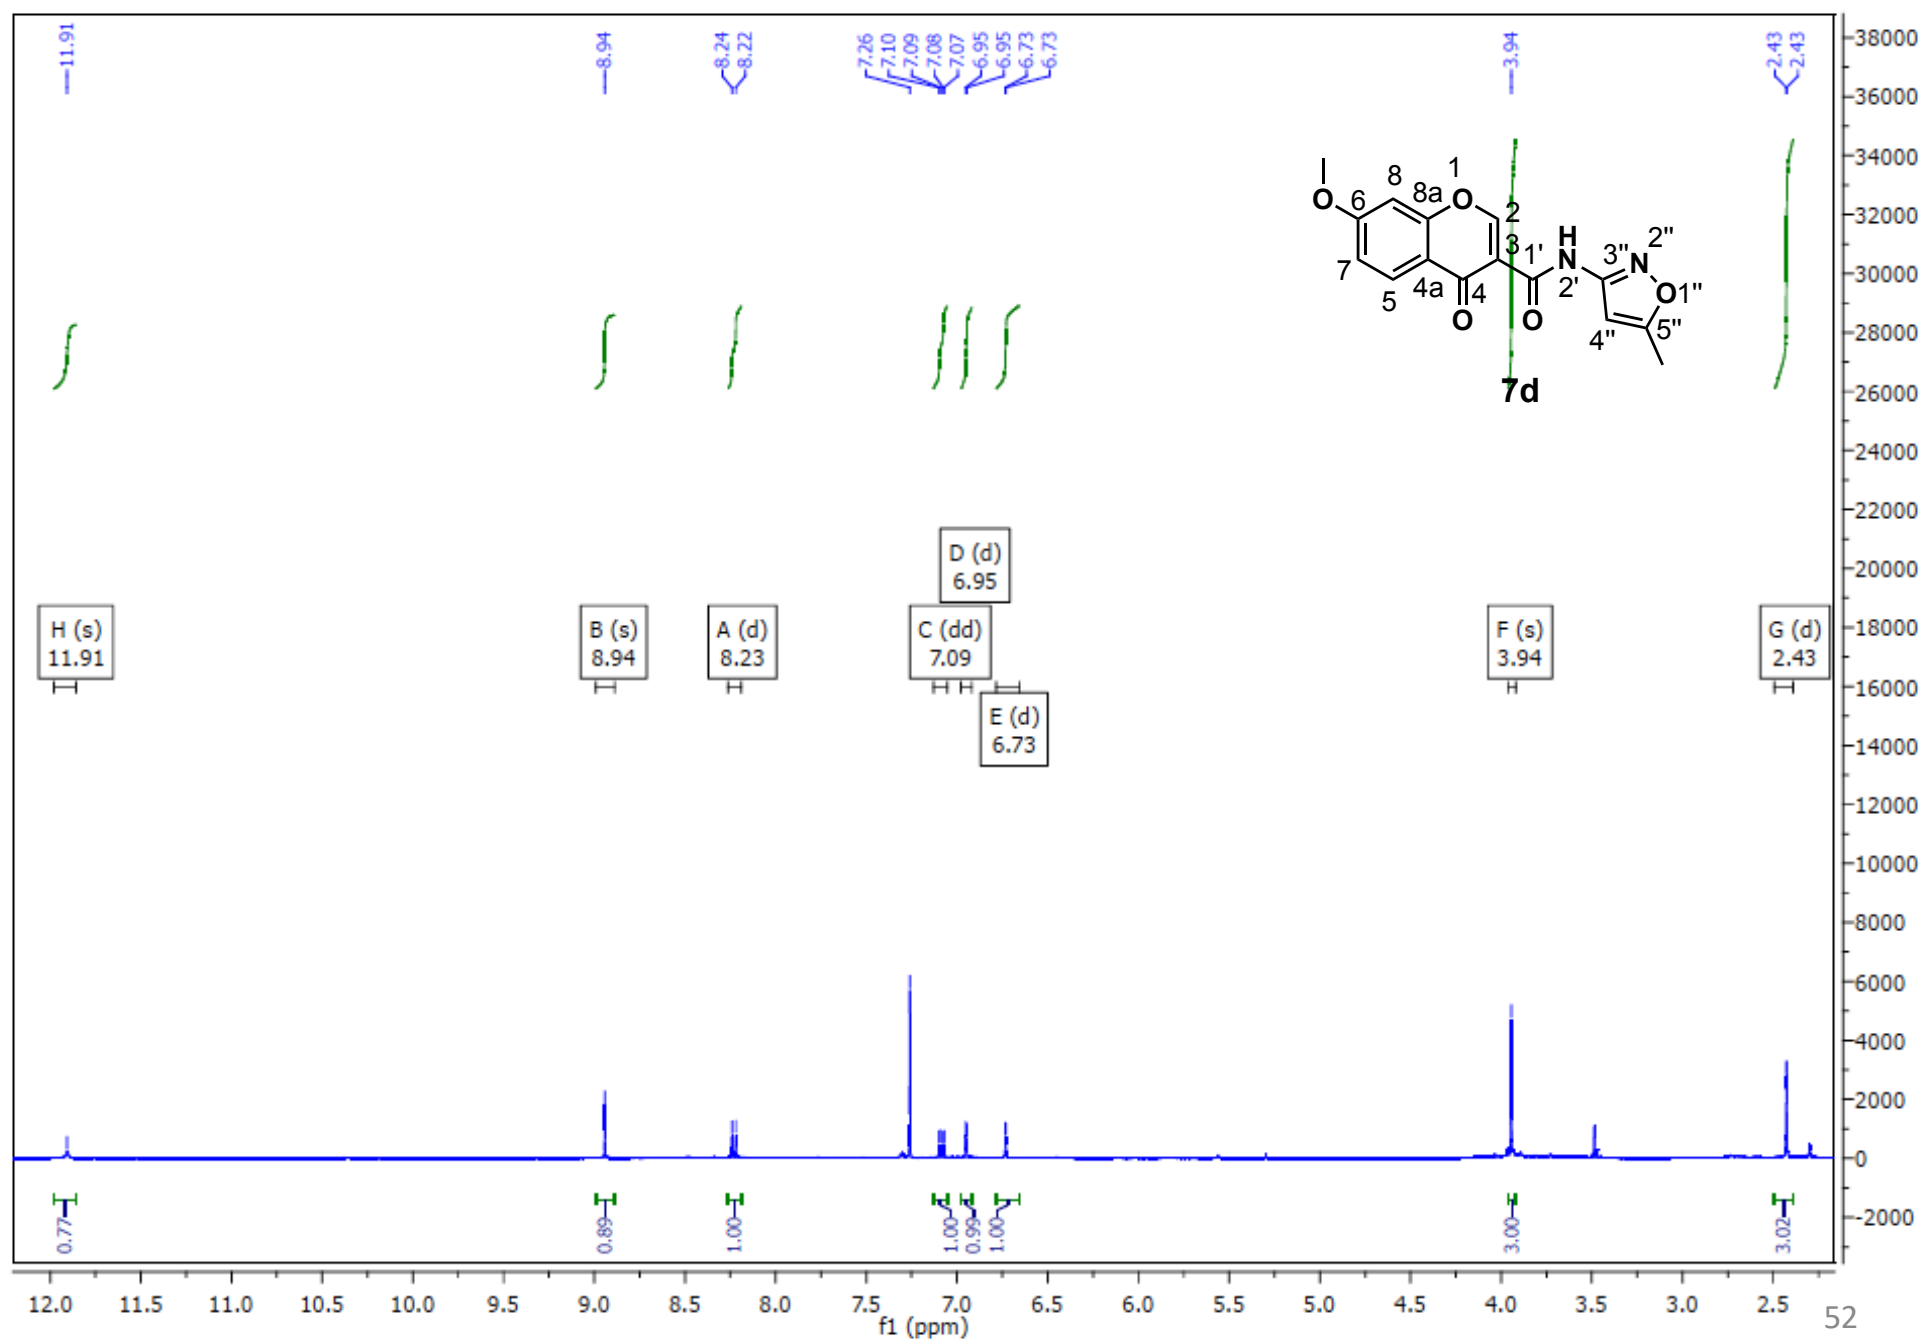

Figure S22.2.  $^{13}\text{C}$  NMR spectra of compound 7d

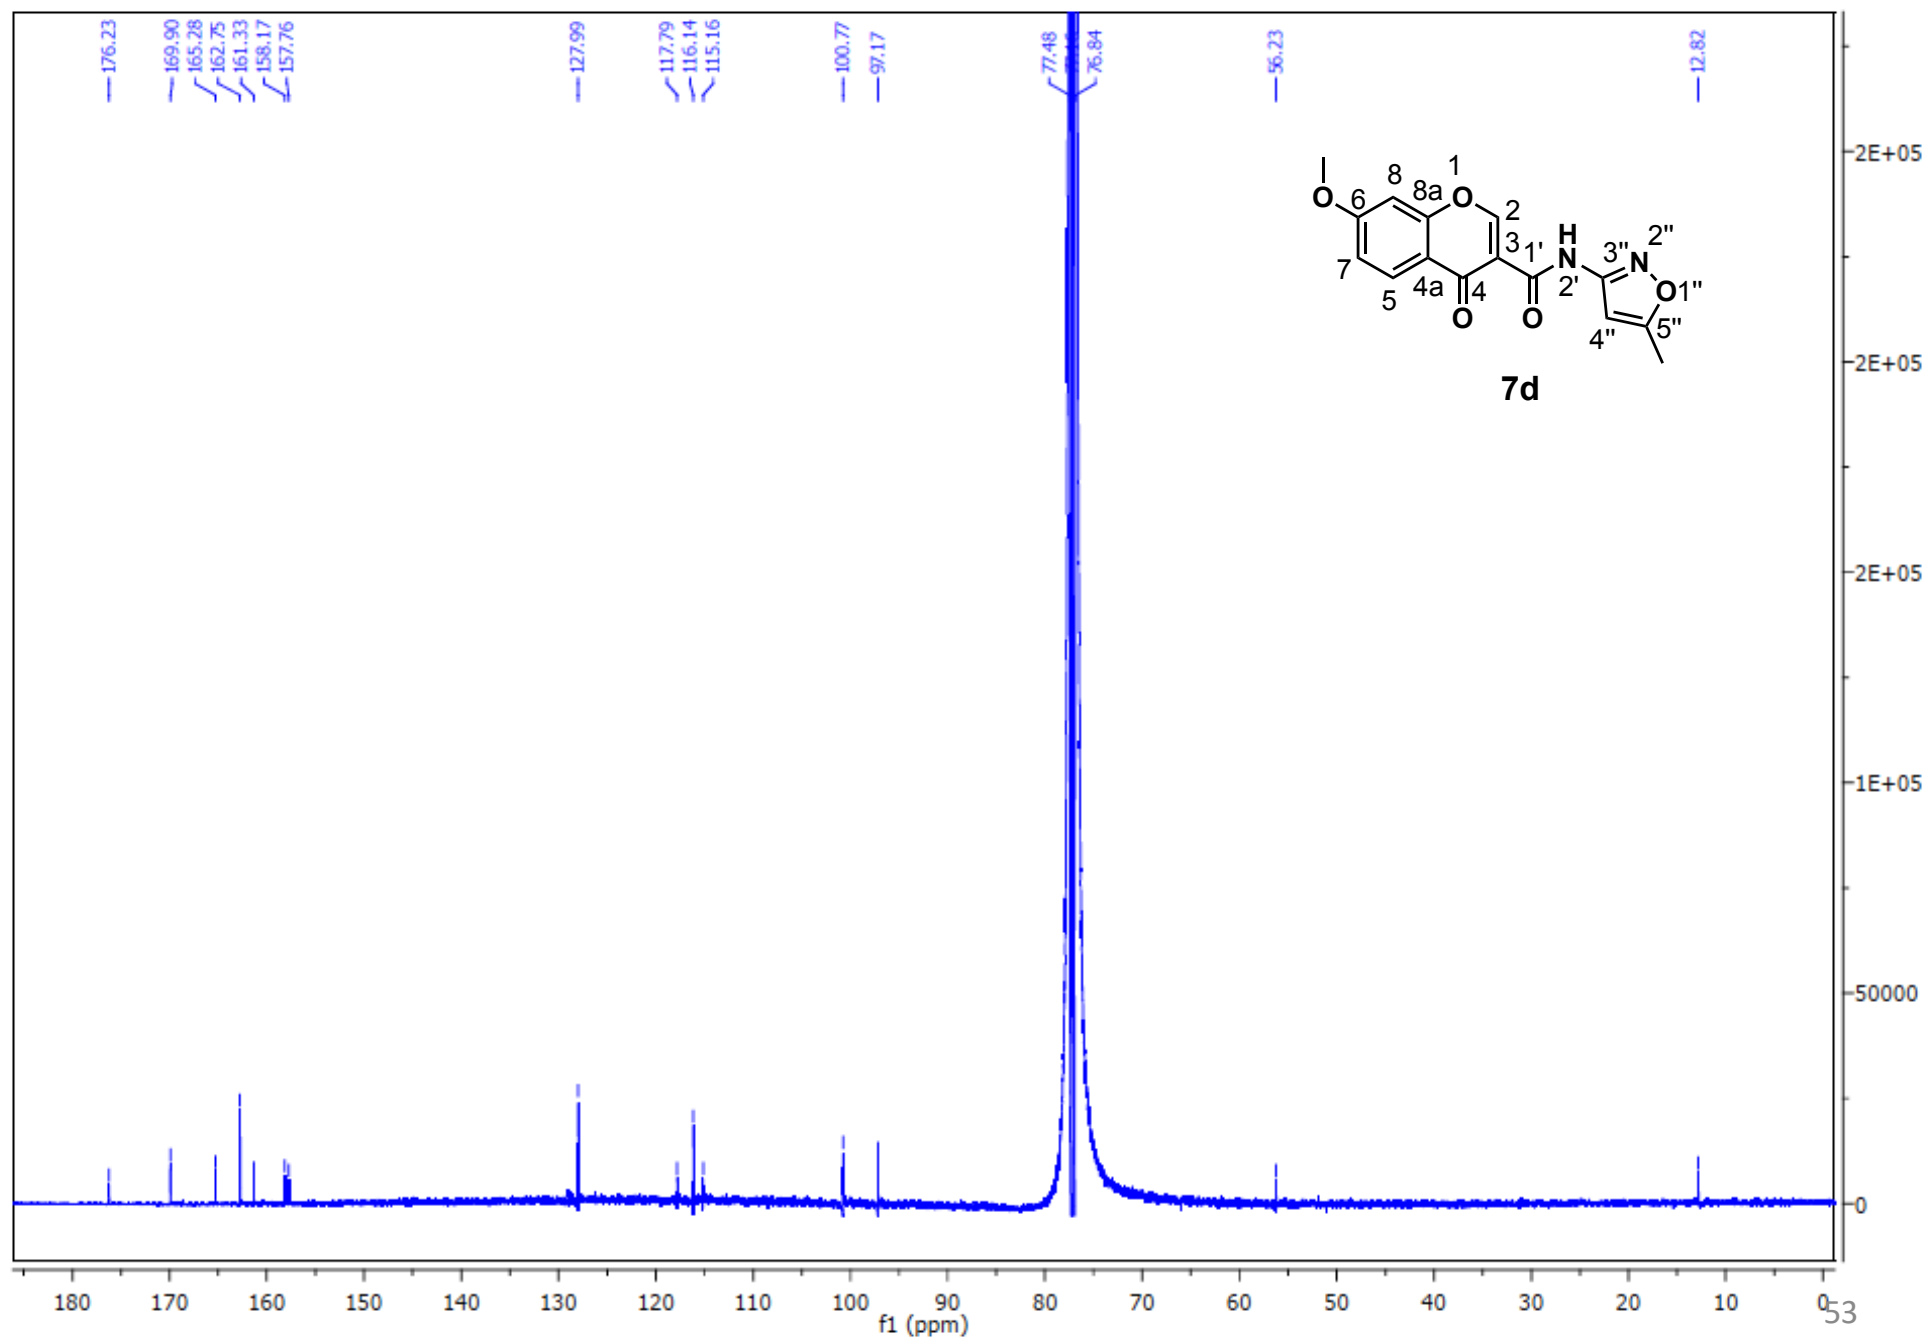

Figure S22.3.  $^{13}\text{C}$ -DEPT NMR spectra of compound 7d

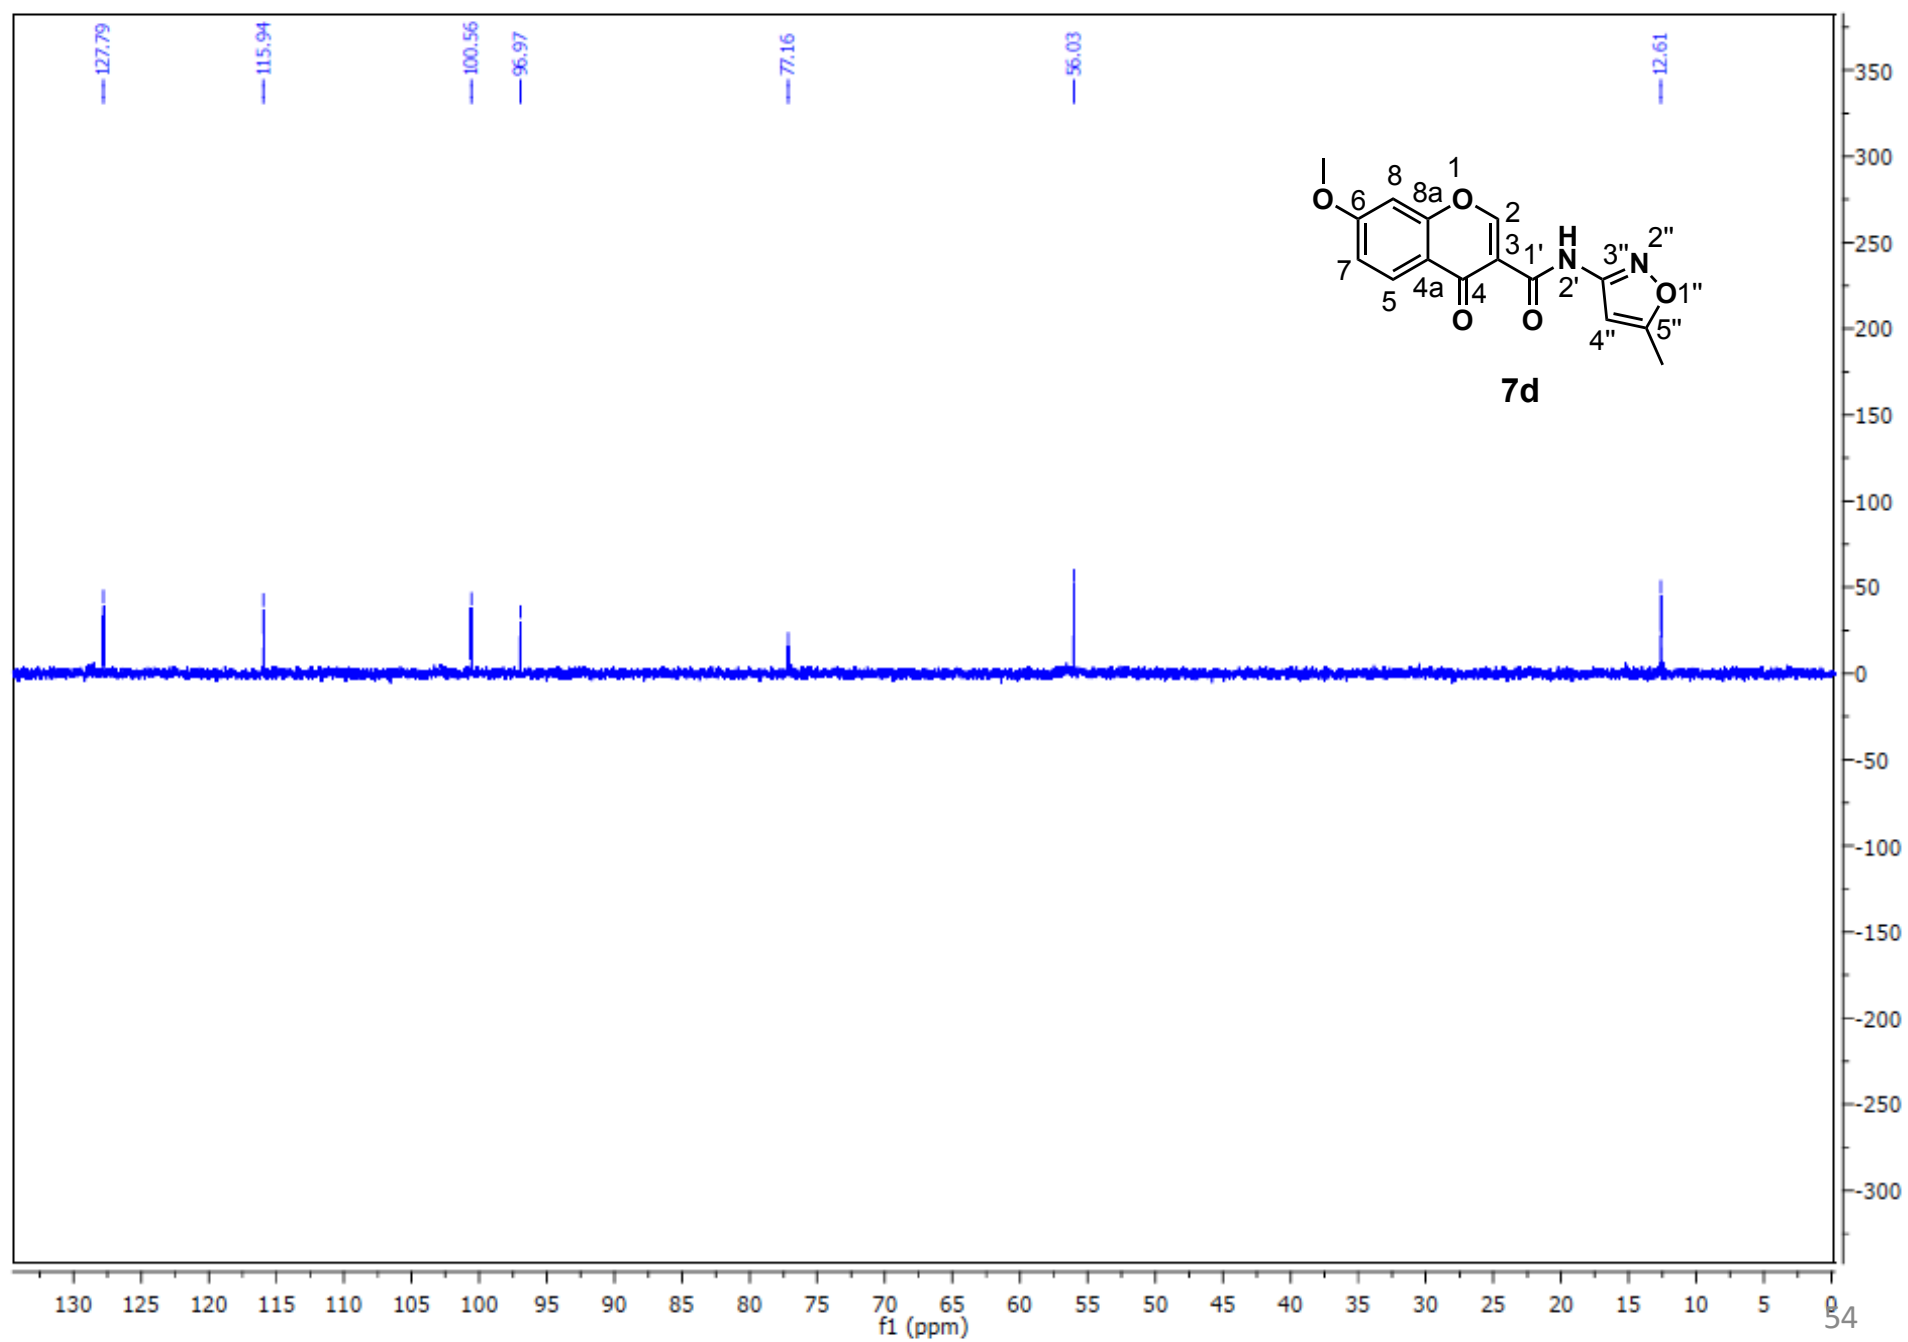

Figure S23.1.  $^1\text{H}$  NMR spectra of compound 8a

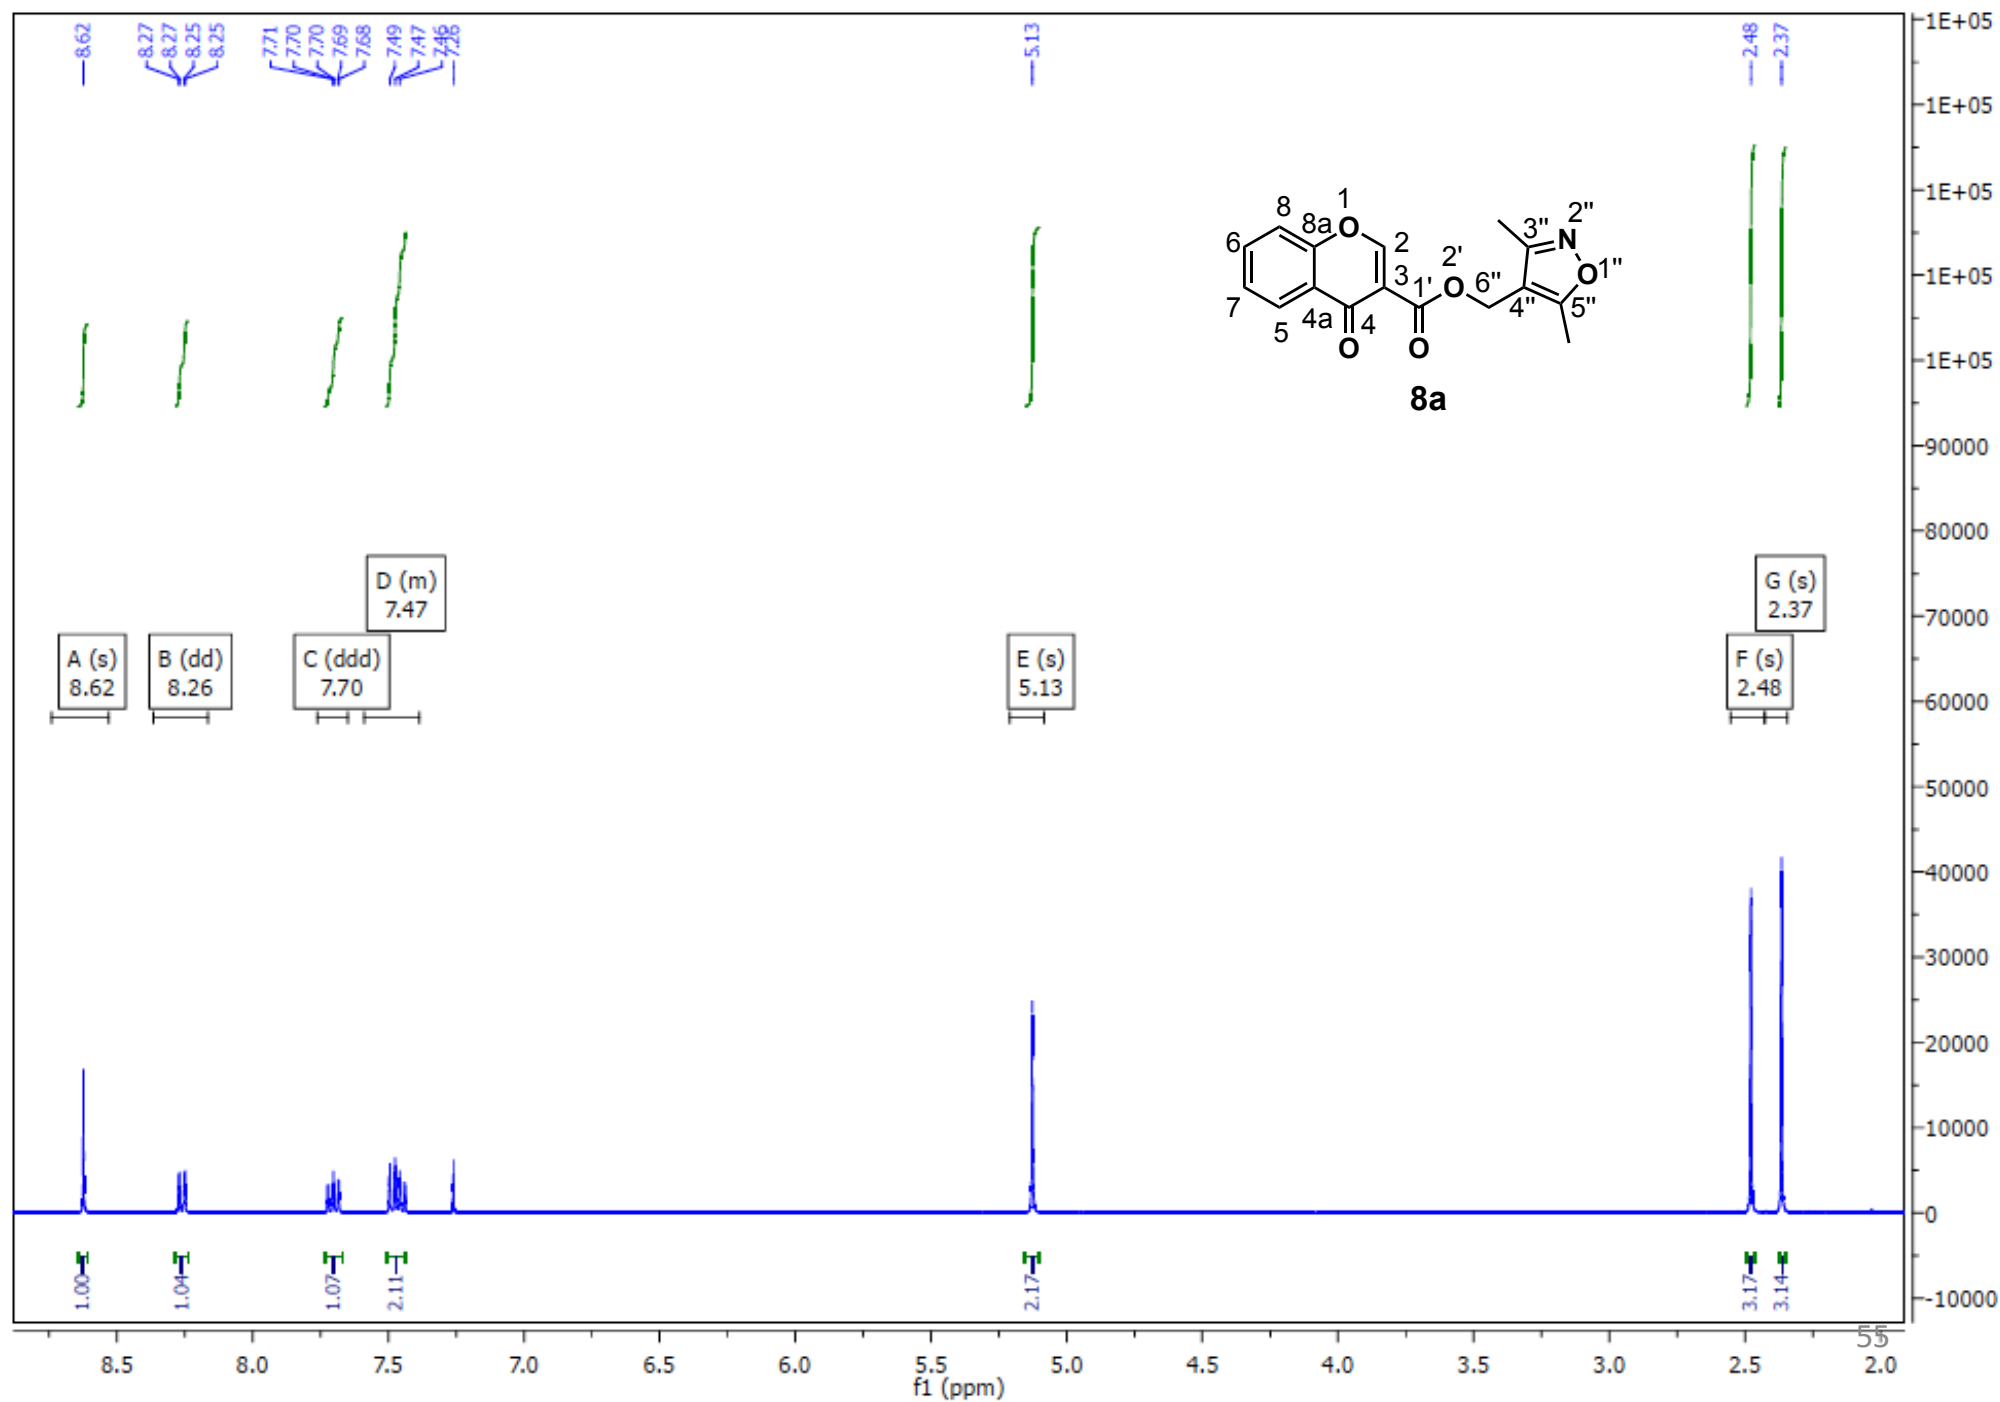

**Figure S23.2.  $^{13}\text{C}$  NMR spectra of compound 8a**

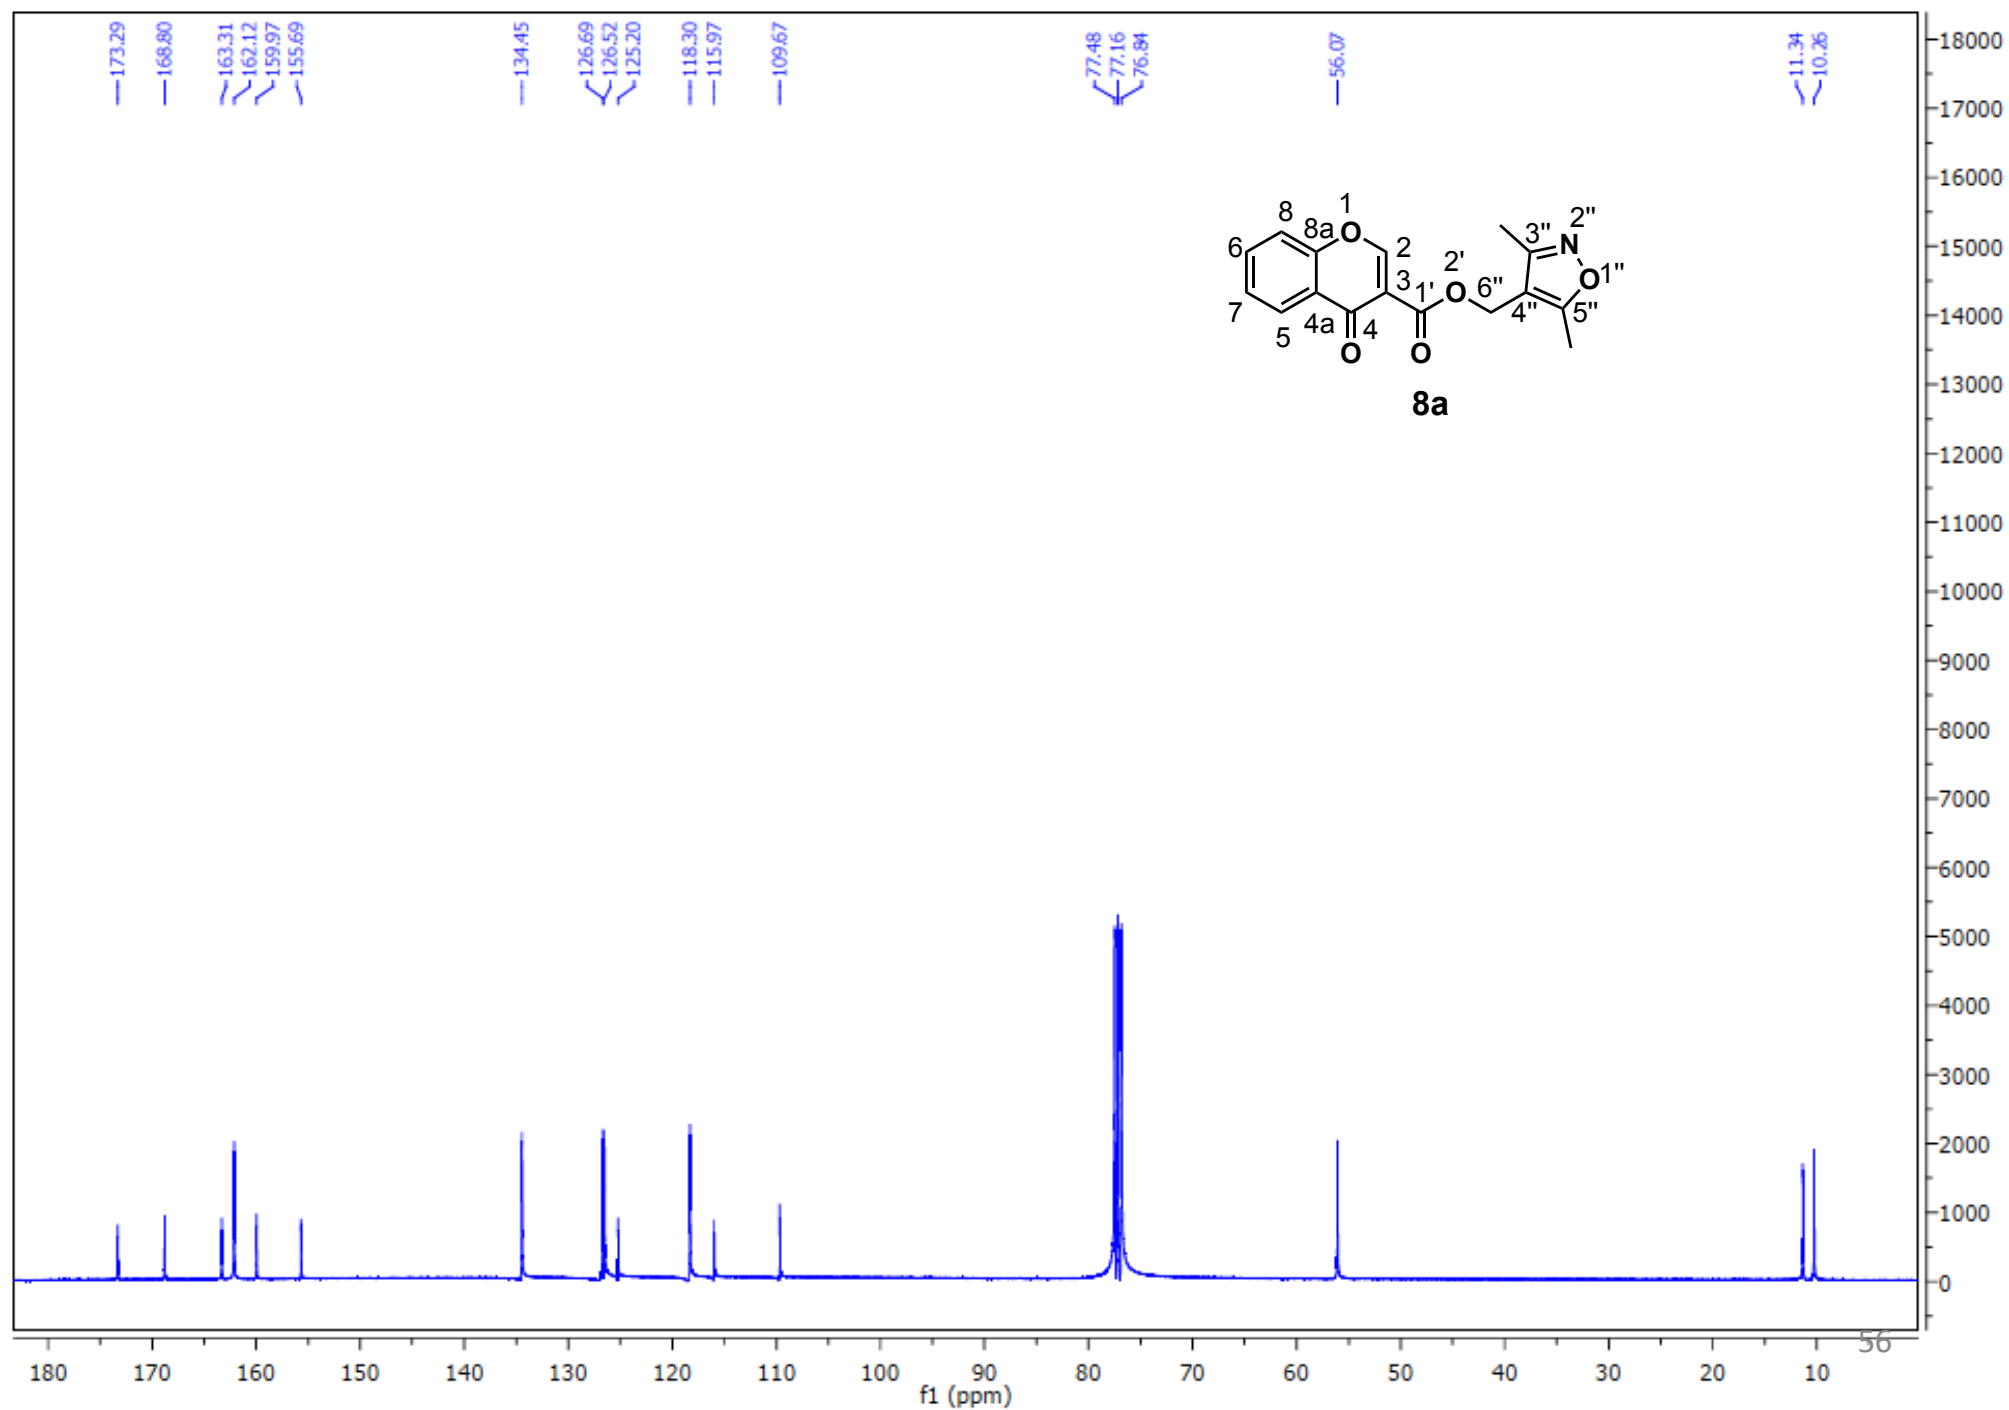



Figure S23.3.  $^{13}\text{C}$ -DEPT NMR spectra of compound 8a

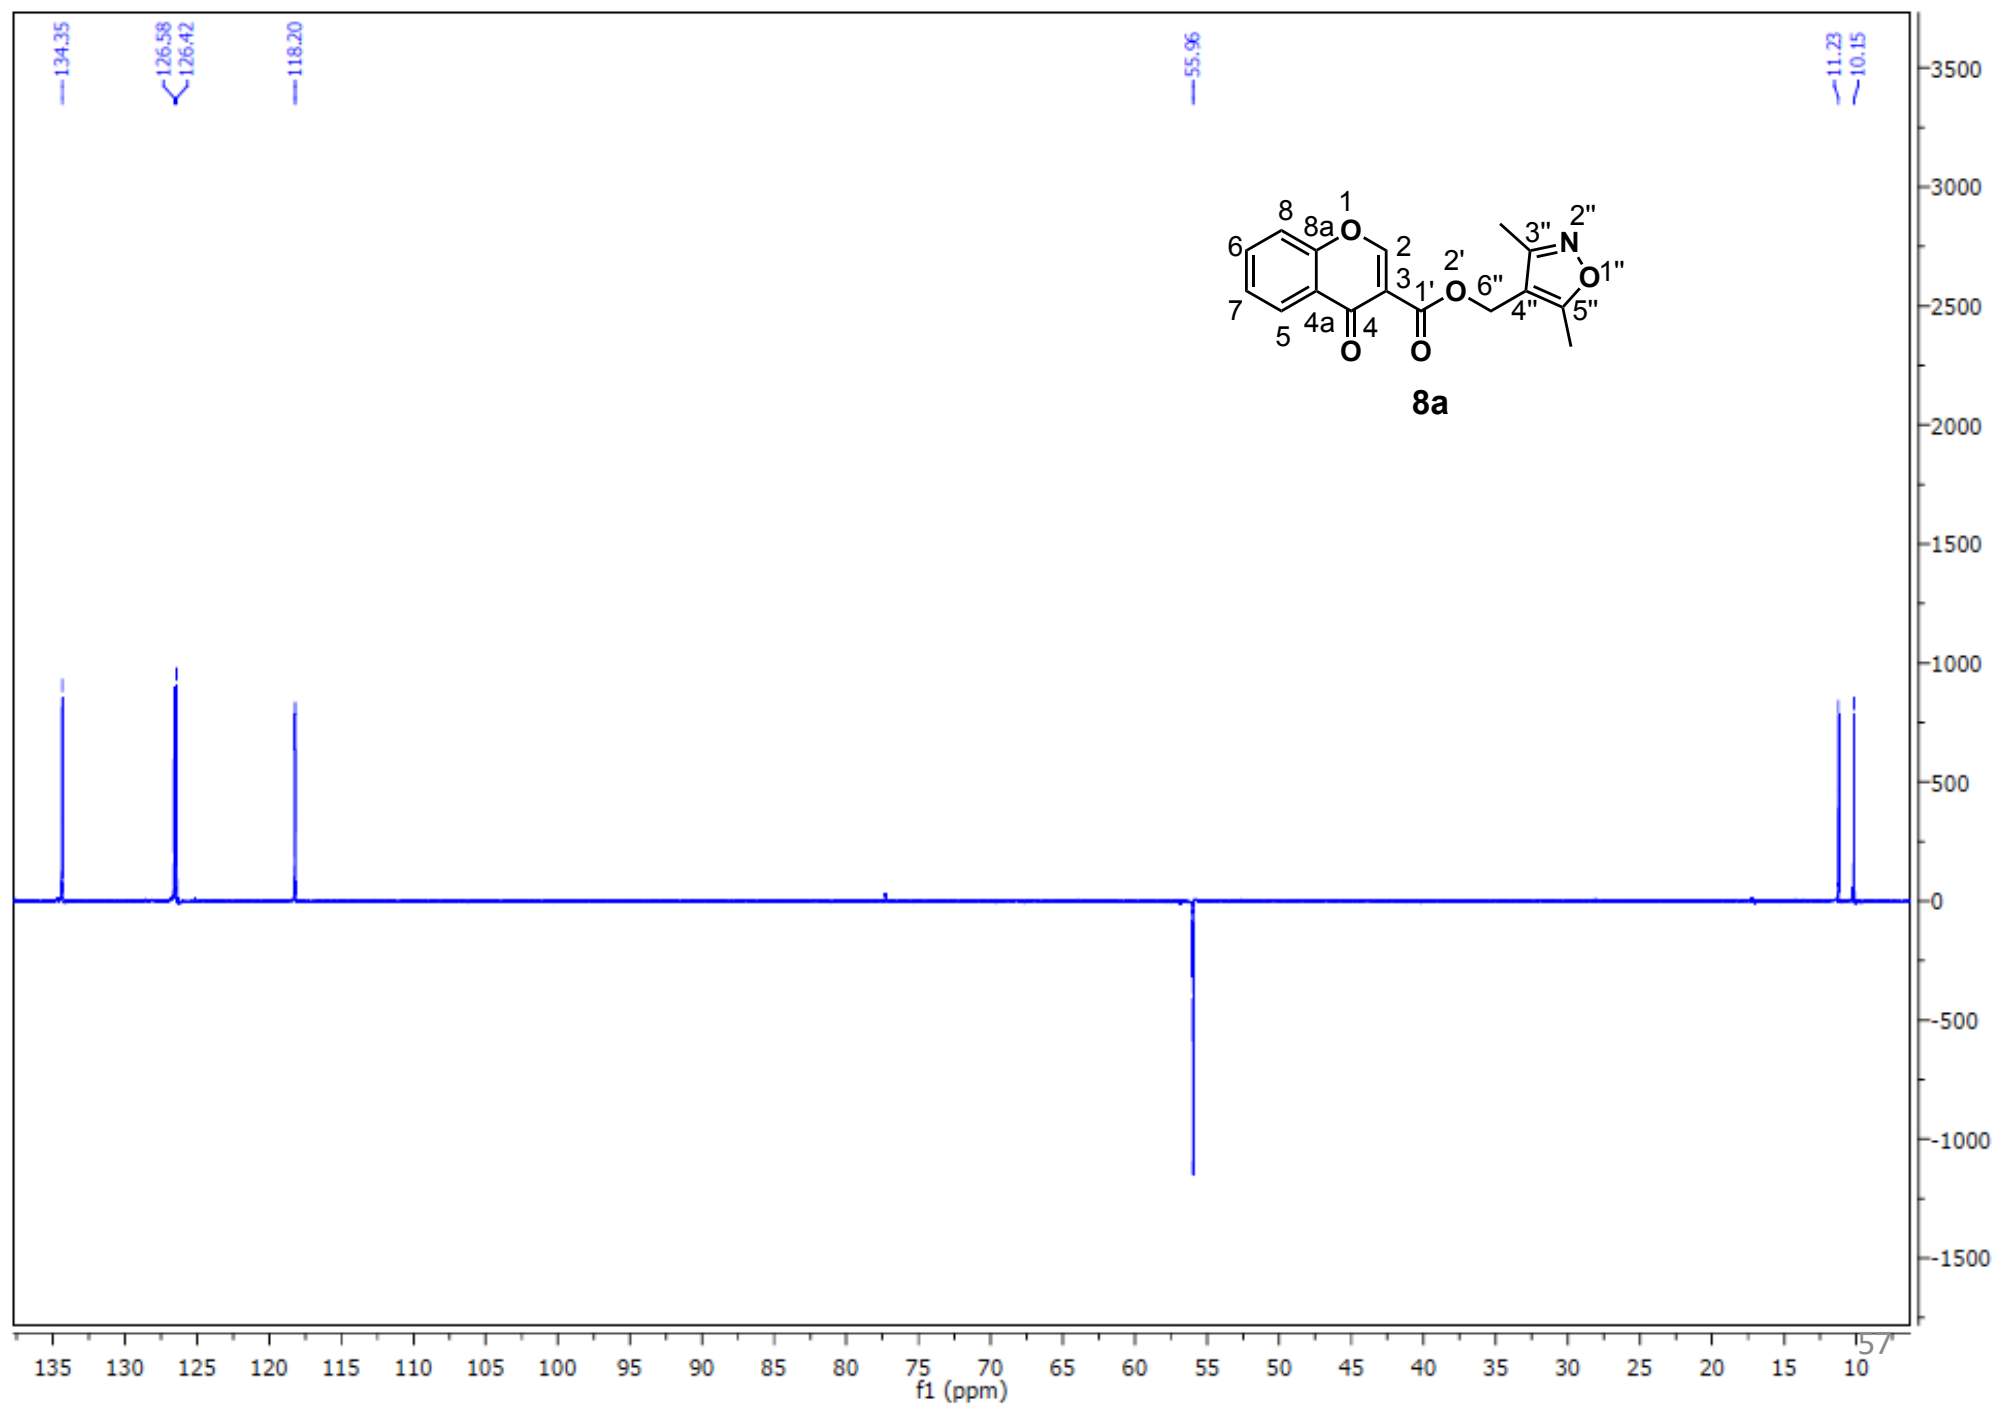

Figure S24.1.  $^1\text{H}$  NMR spectra of compound 9a

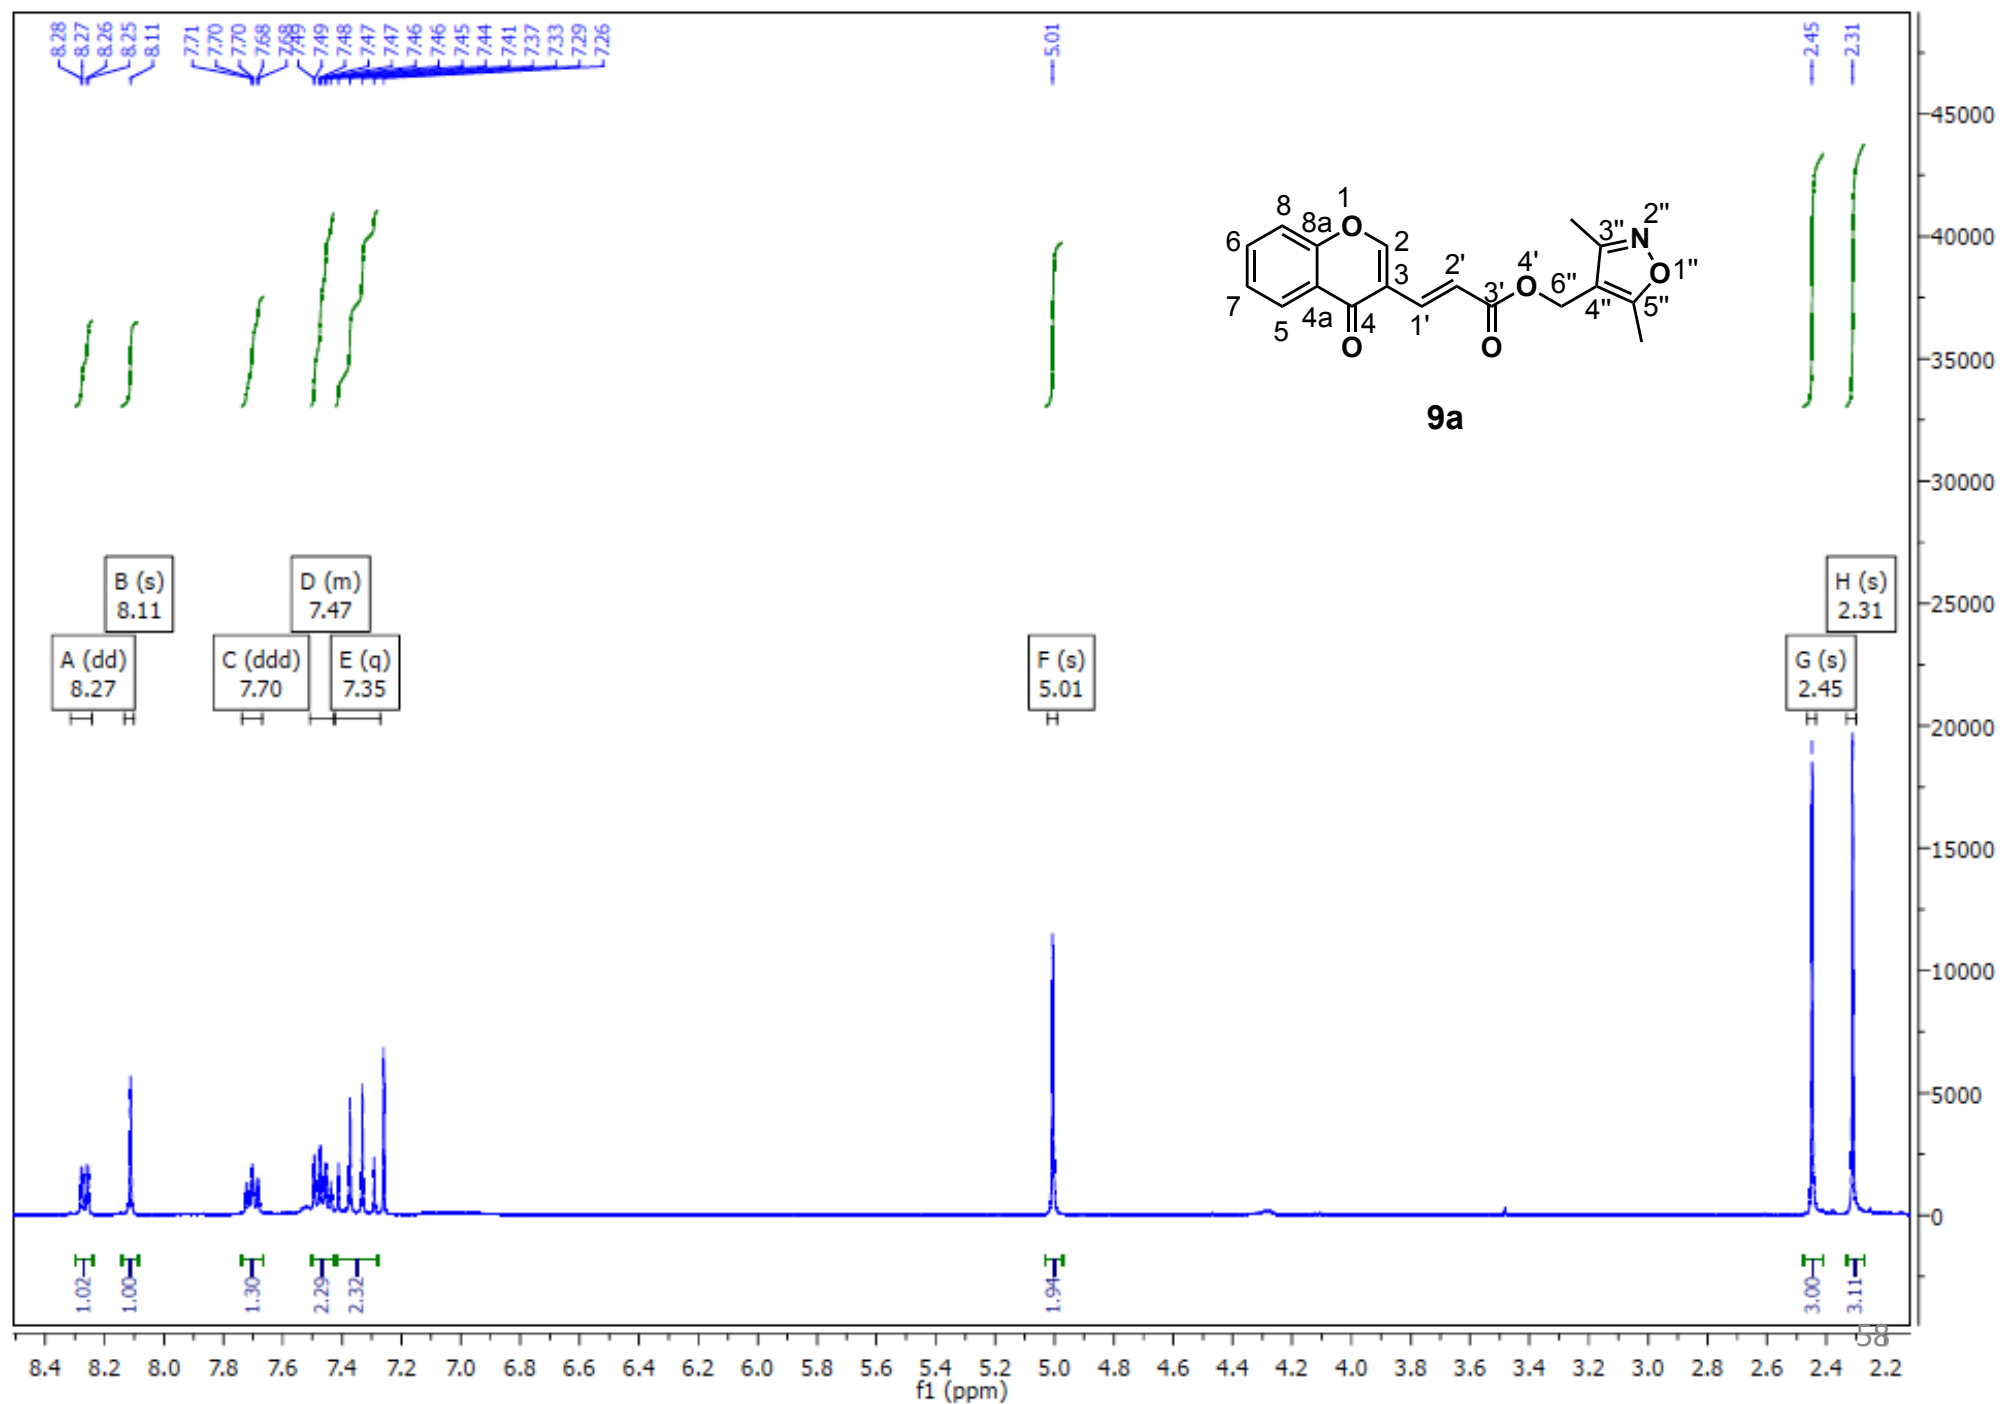

Figure S24.2.  $^{13}\text{C}$  NMR spectra of compound 9a

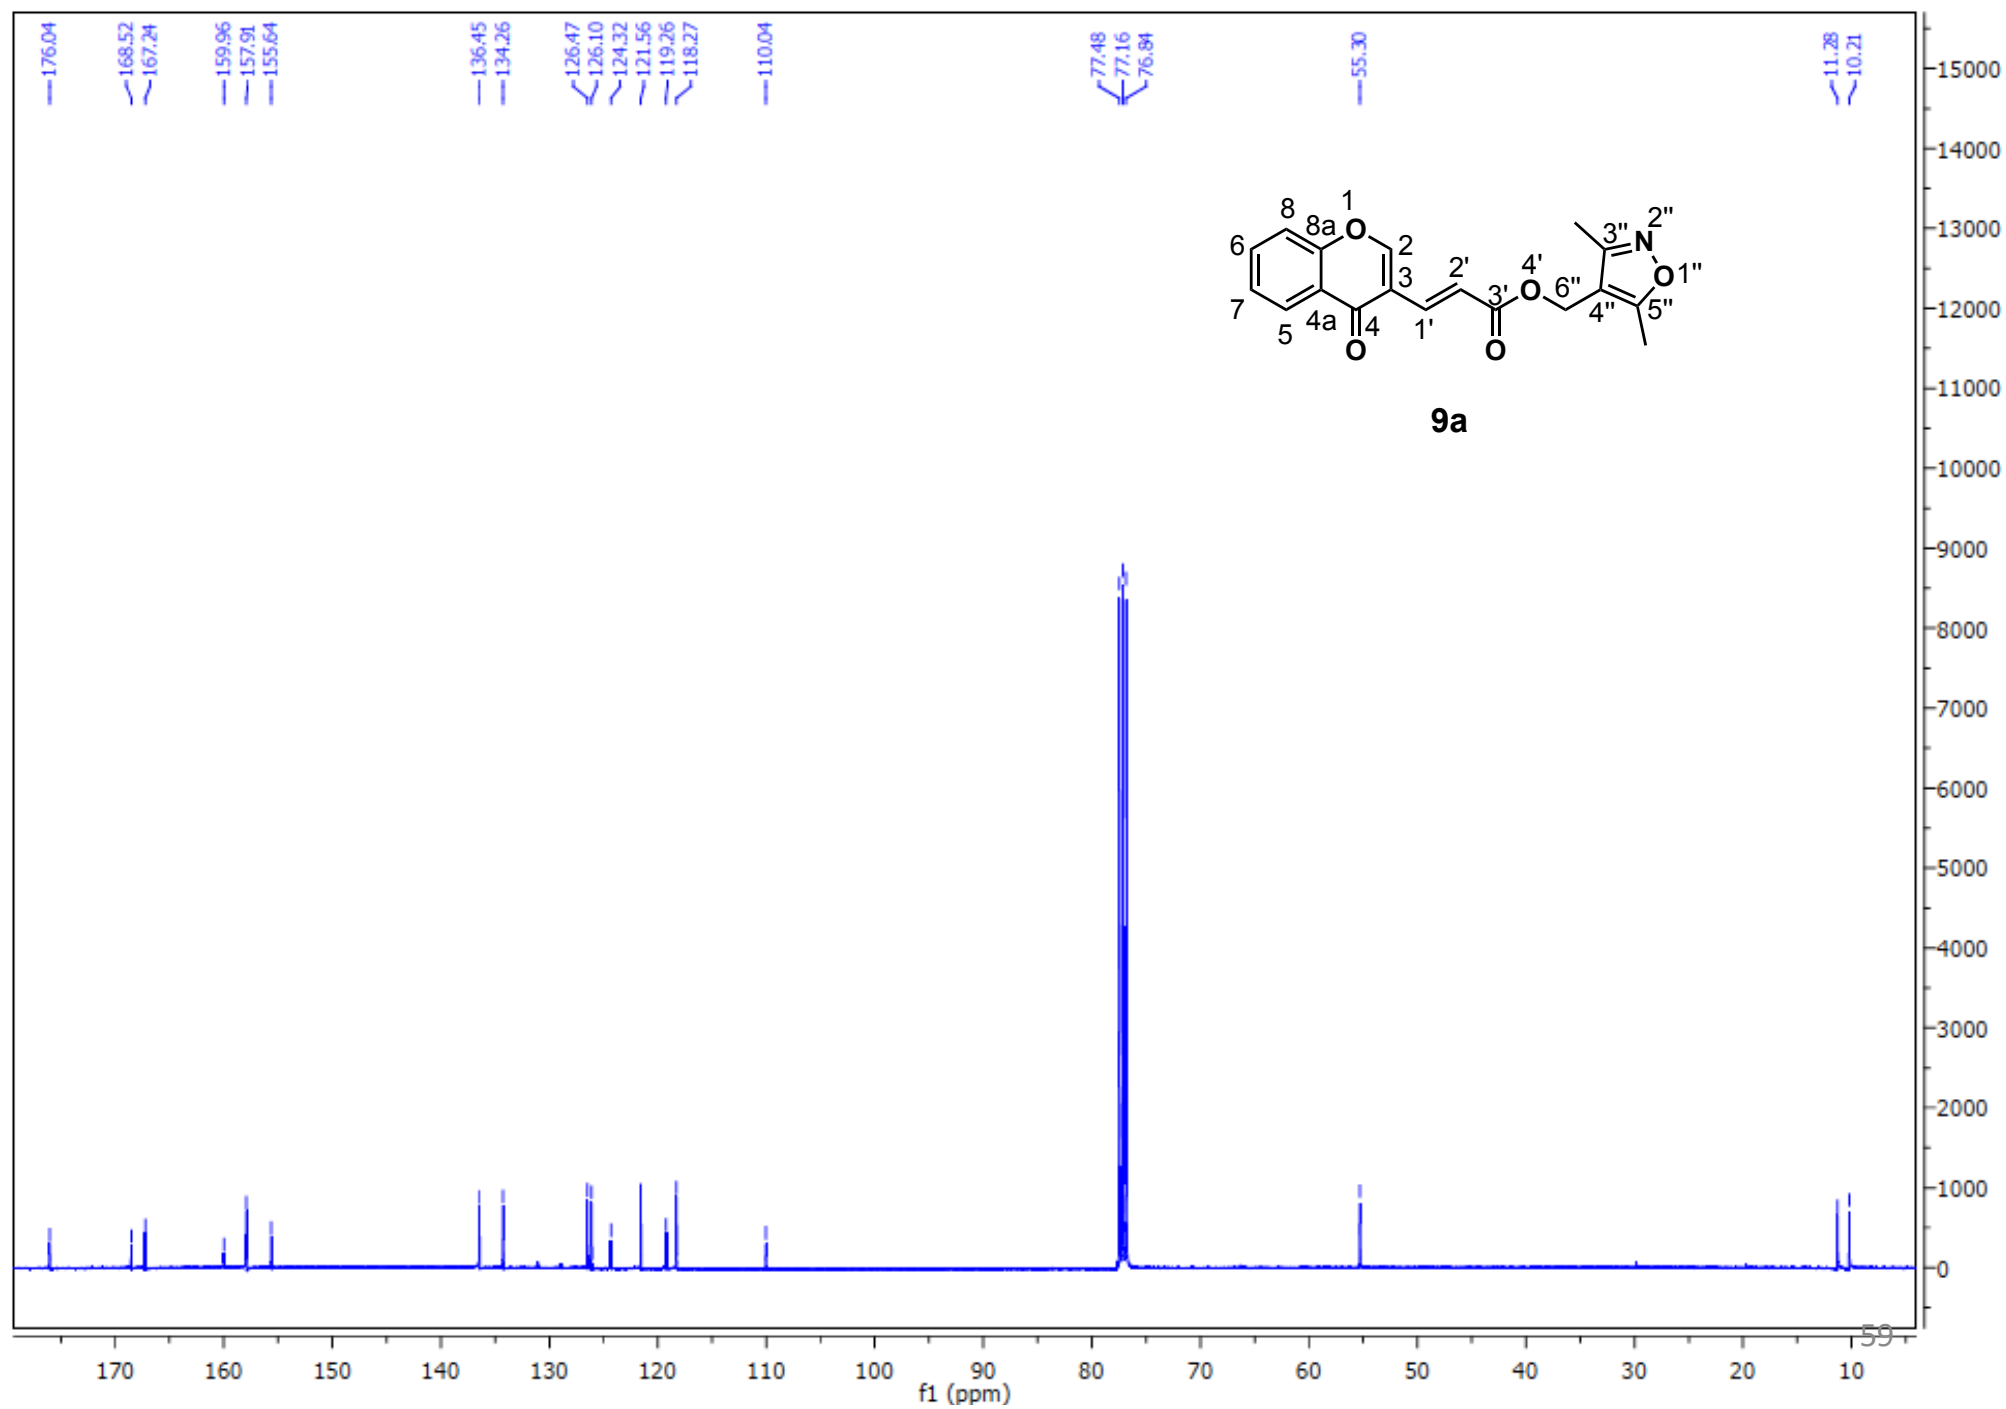

Figure S25.1.  $^1\text{H}$  NMR spectra of compound 9c

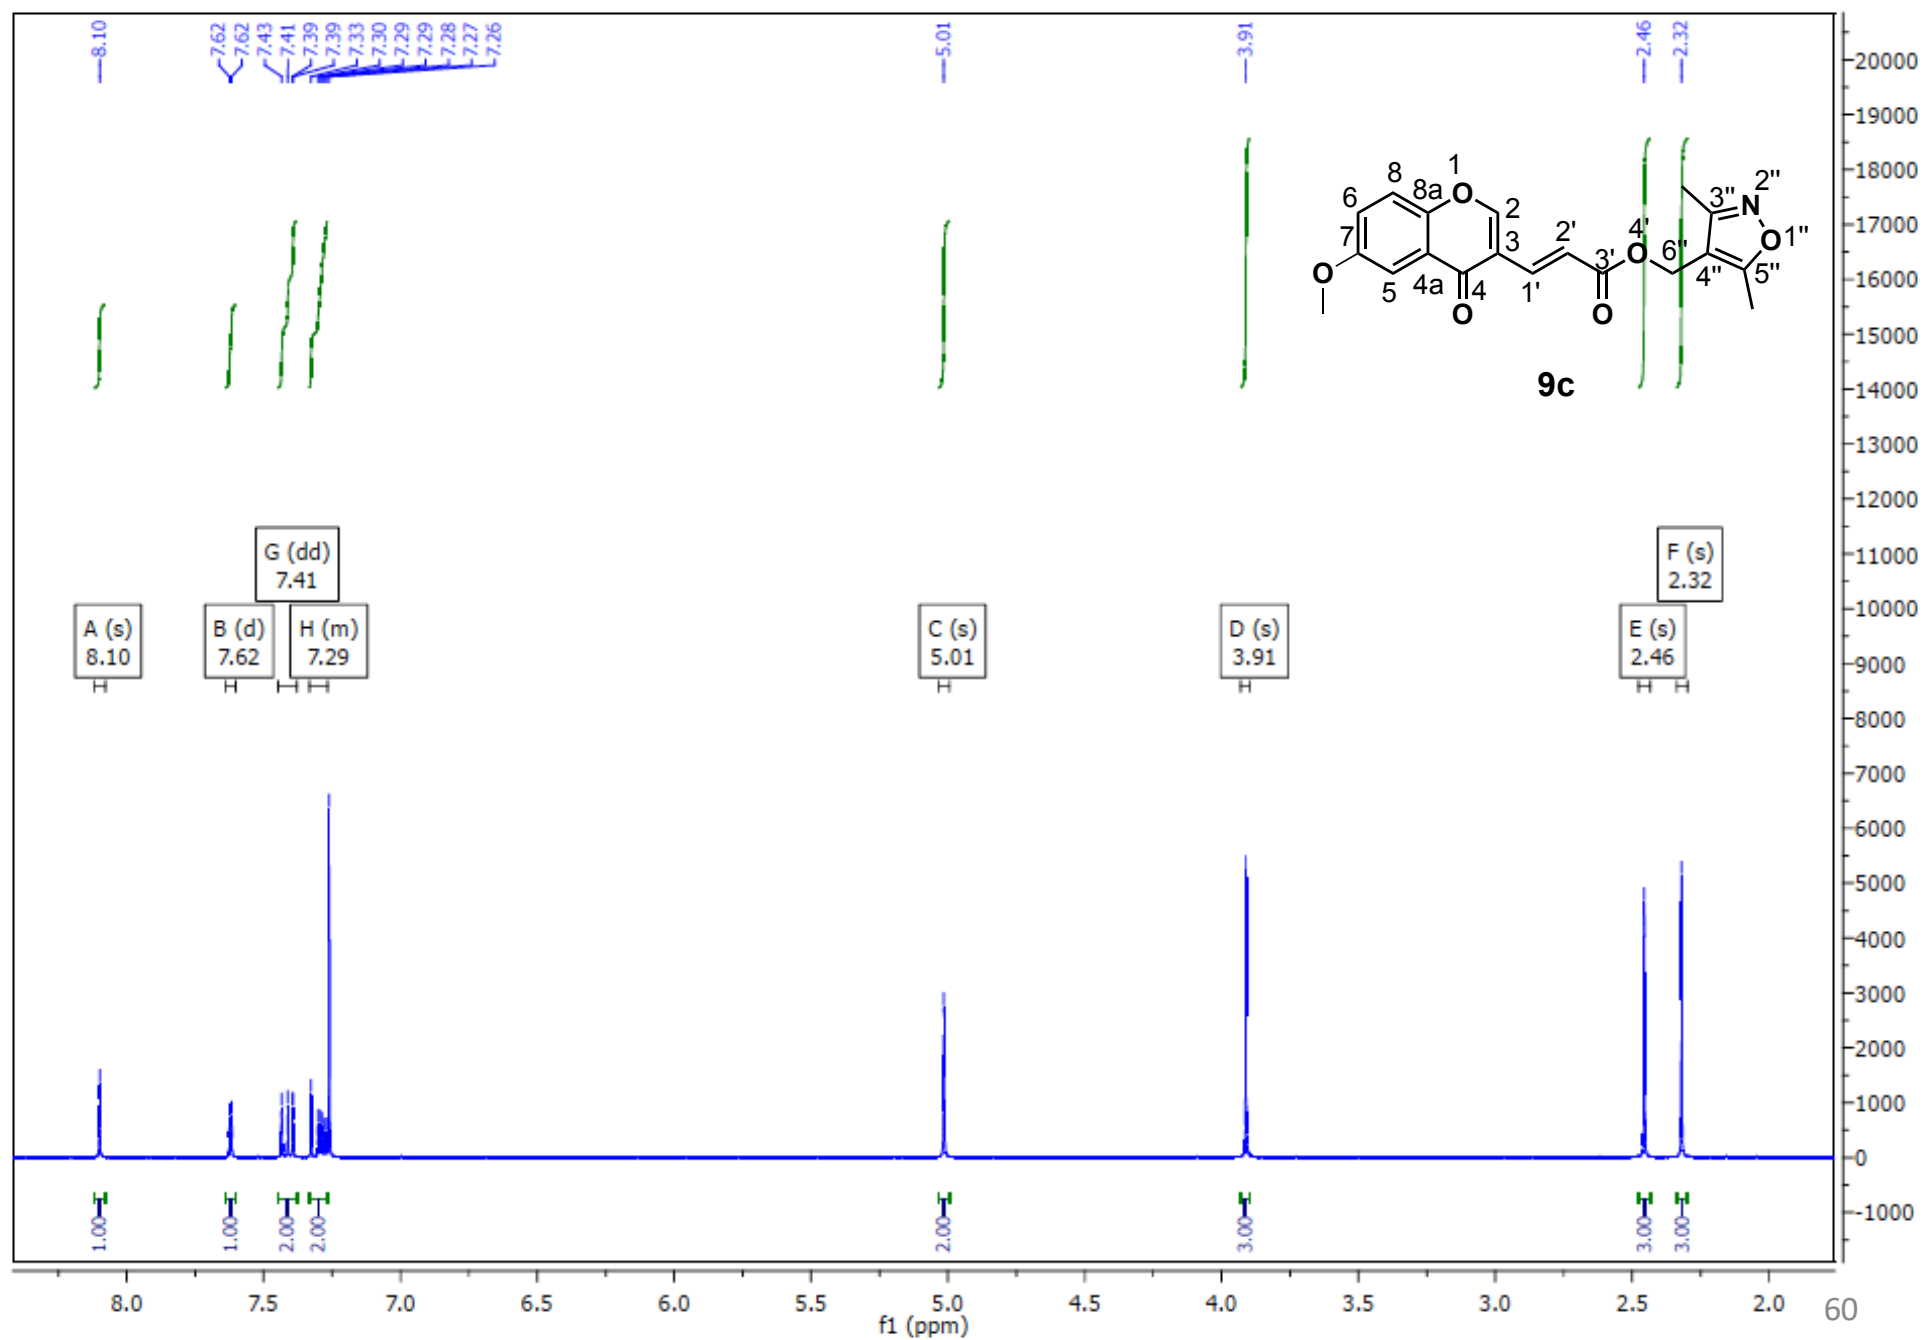

Figure S25.2.  $^{13}\text{C}$  NMR spectra of compound 9c

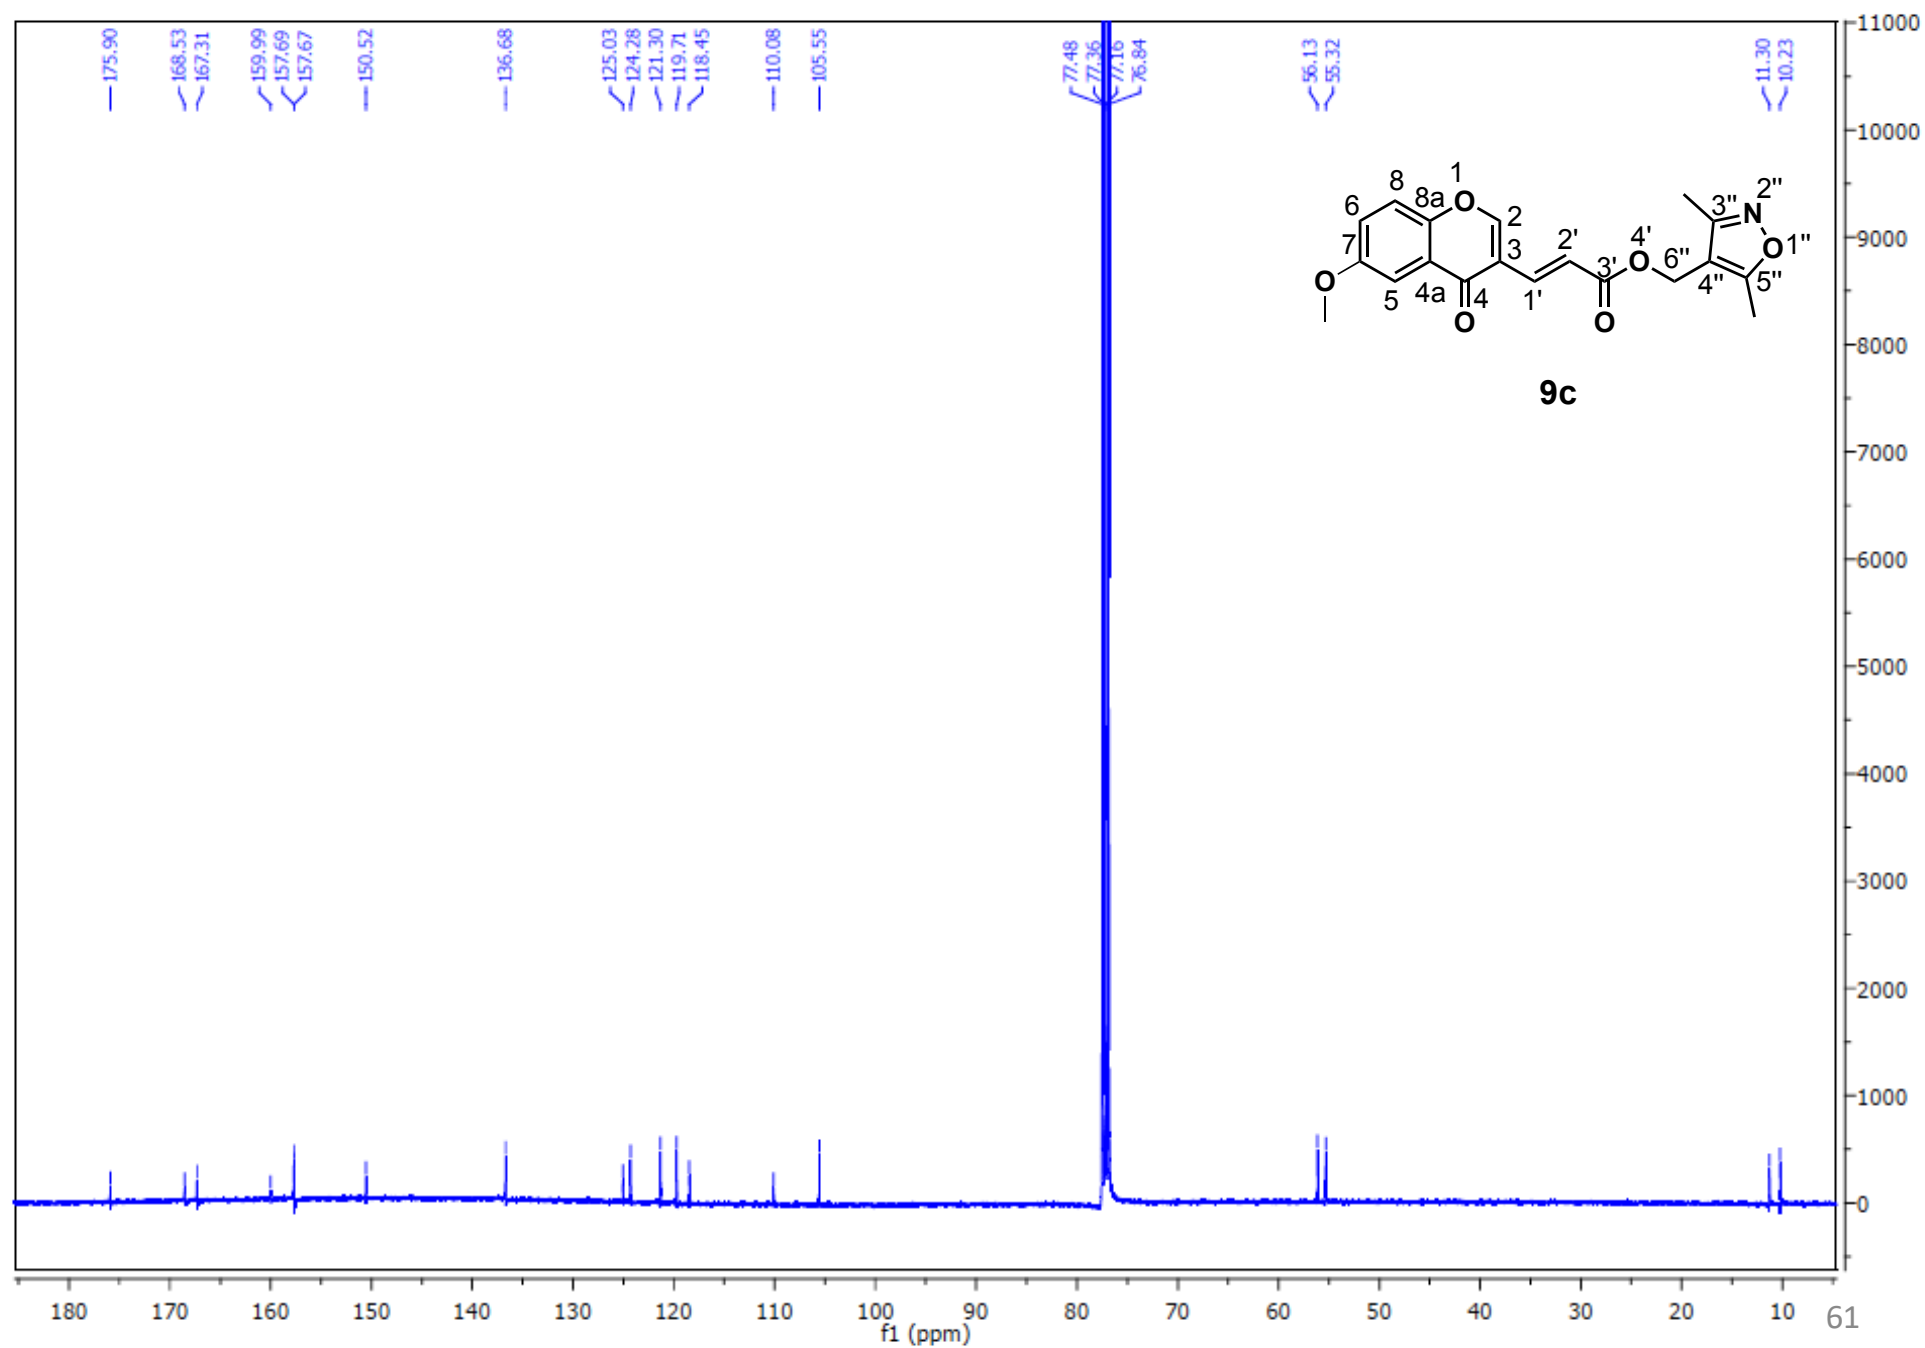

Figure S25.3.  $^{13}\text{C}$ -DEPT NMR spectra of compound 9c

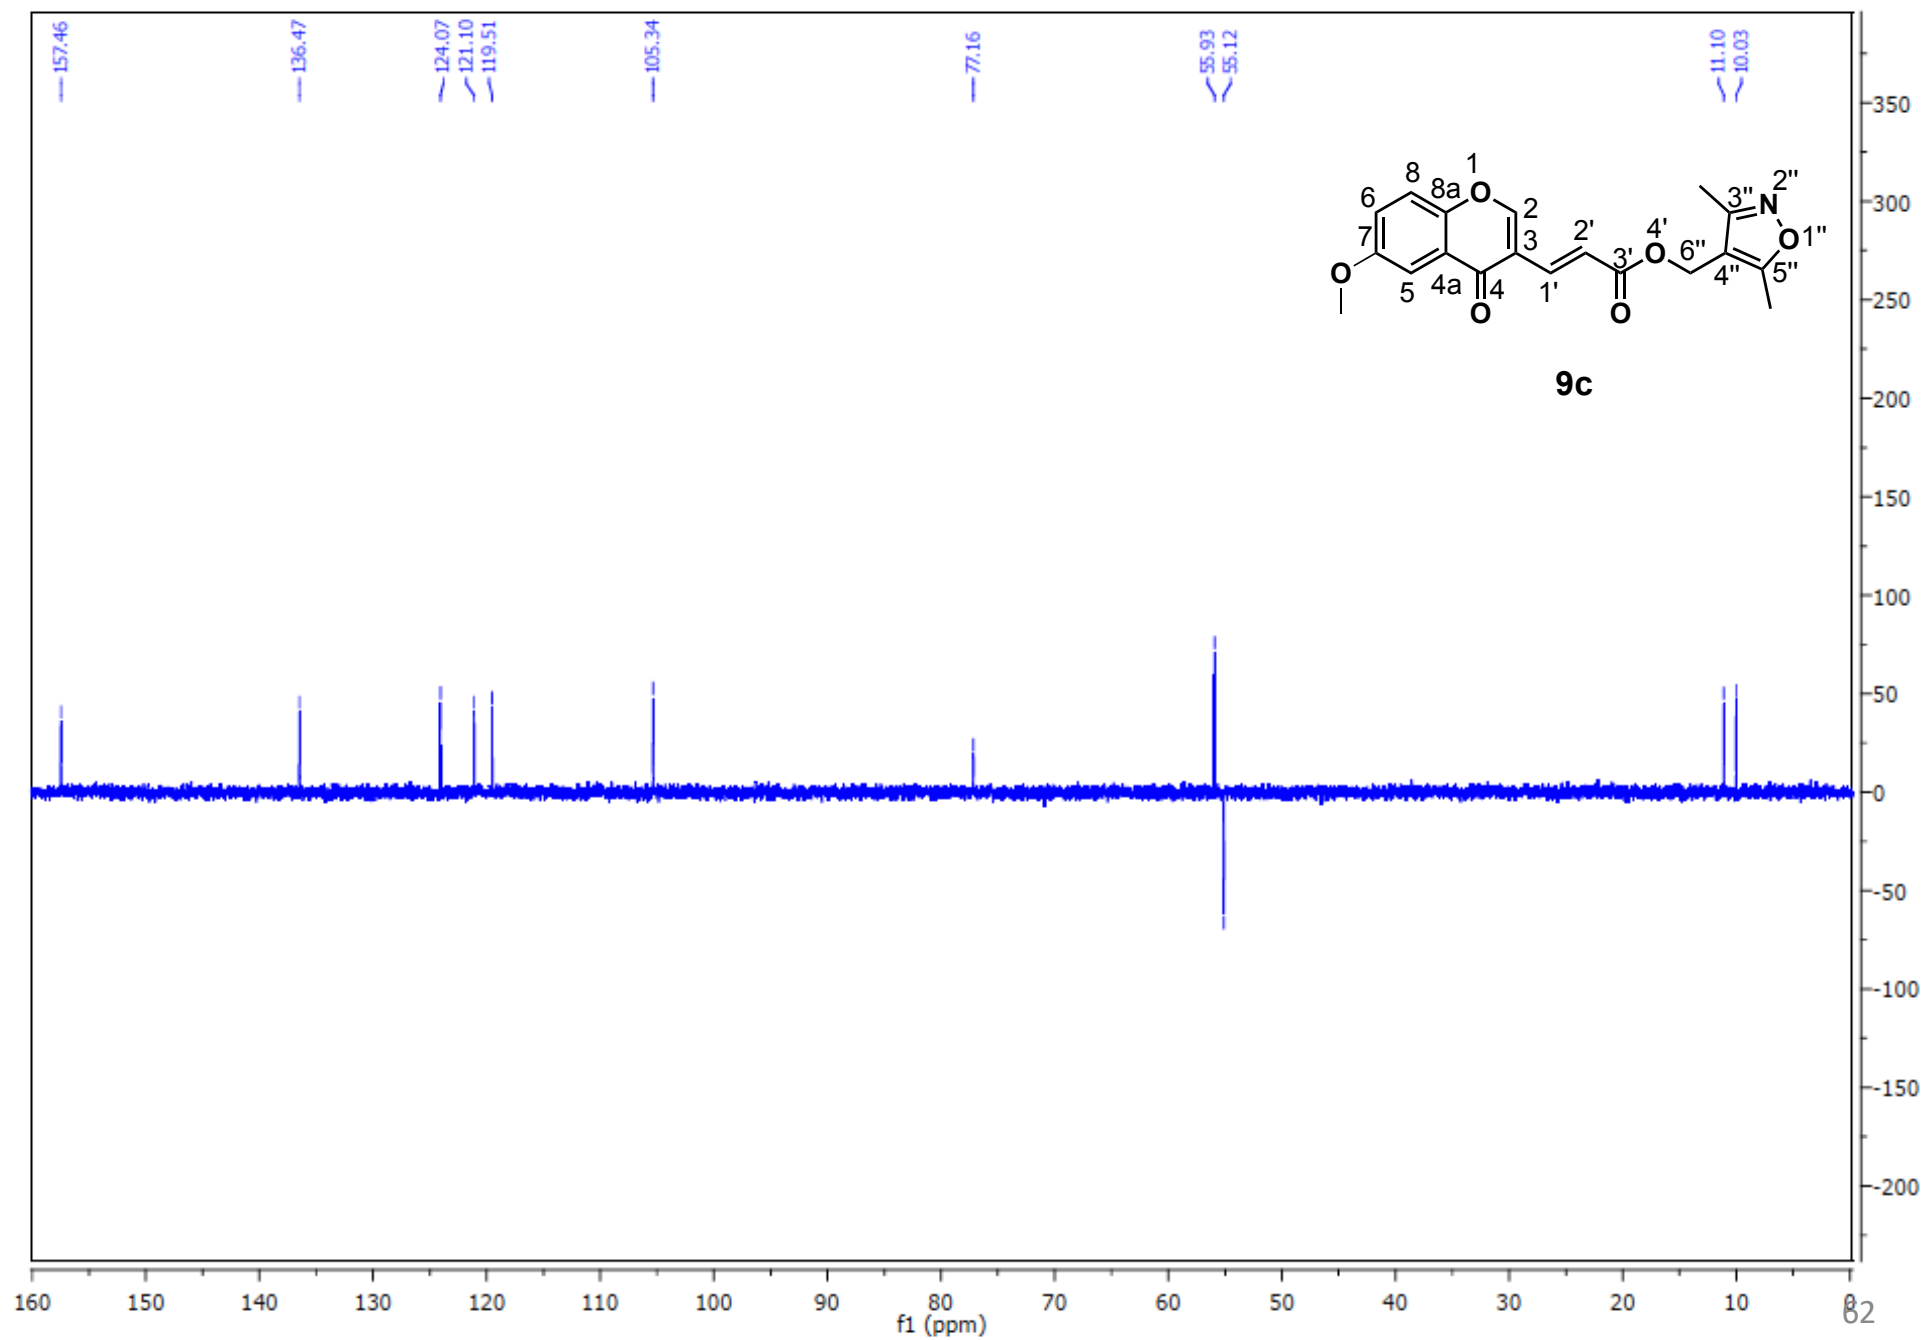

**Figure S26.1.  $^1\text{H}$  NMR spectra of compound 9d**

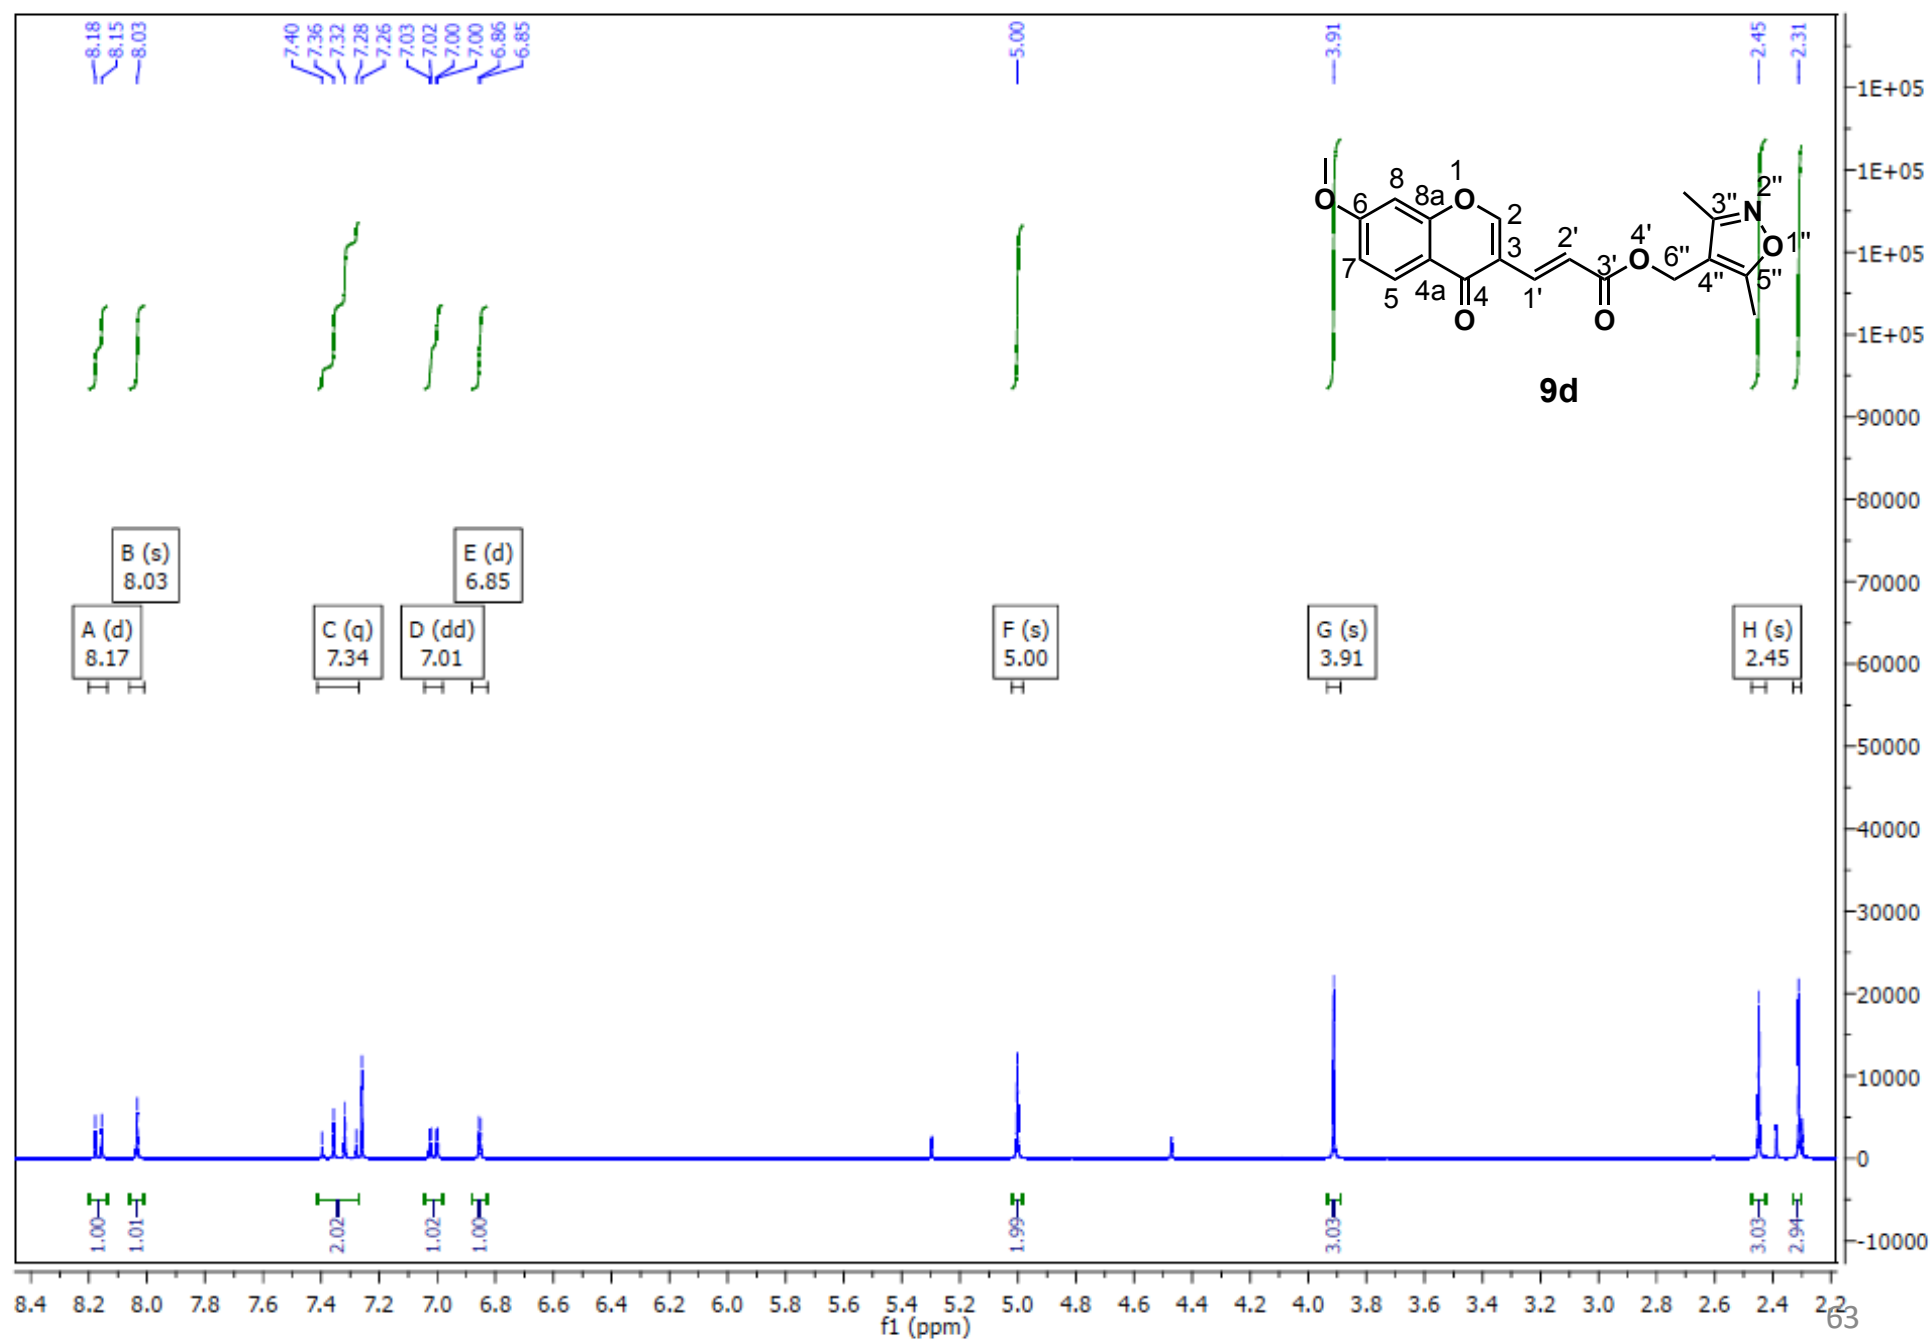

**Figure S26.2.  $^{13}\text{C}$  NMR spectra of compound 9d**

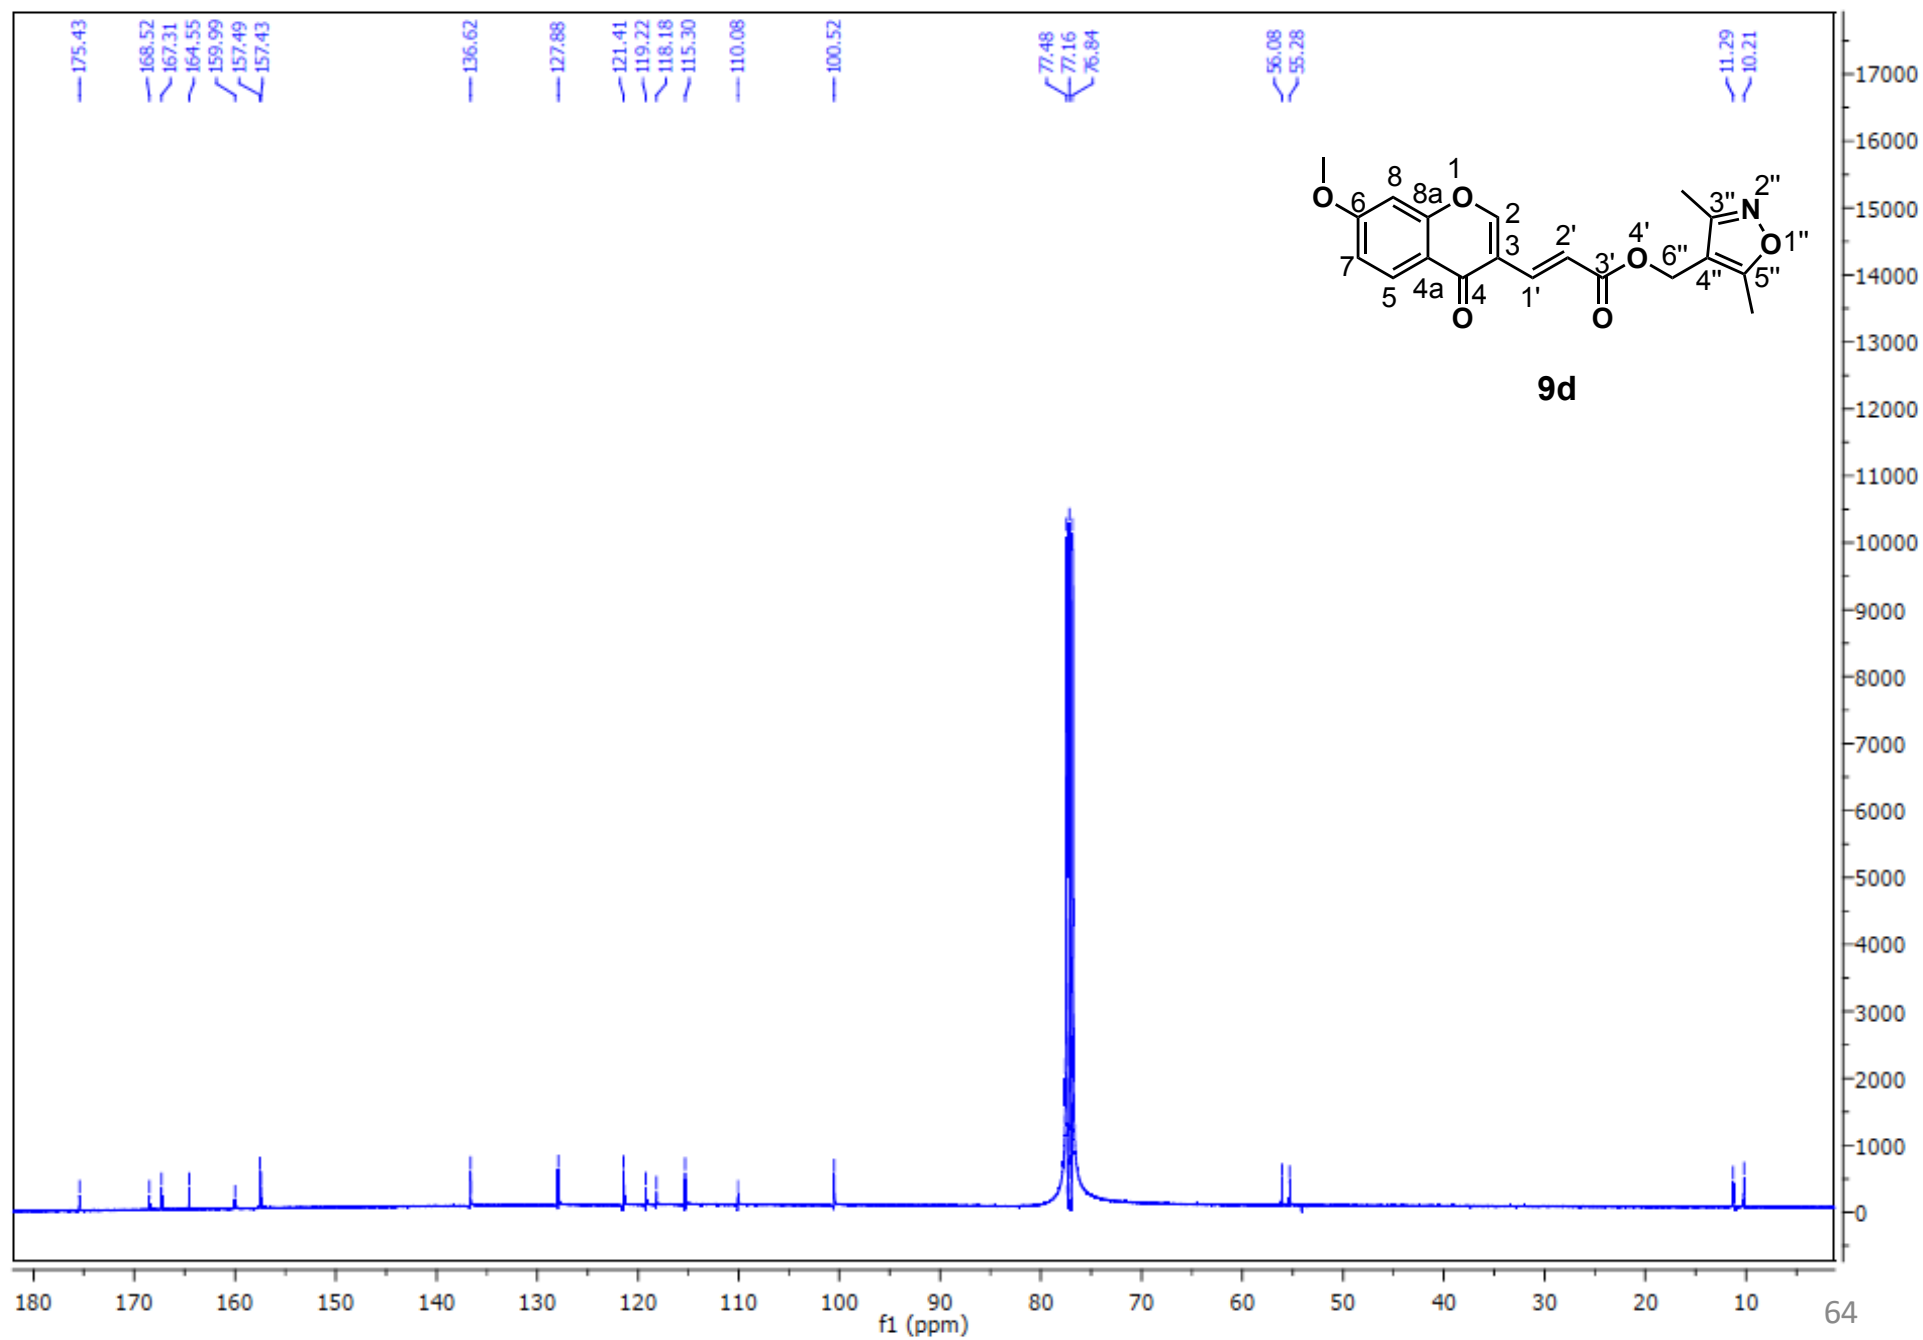



Figure S26.3.  $^{13}\text{C}$ -DEPT NMR spectra of compound 9d

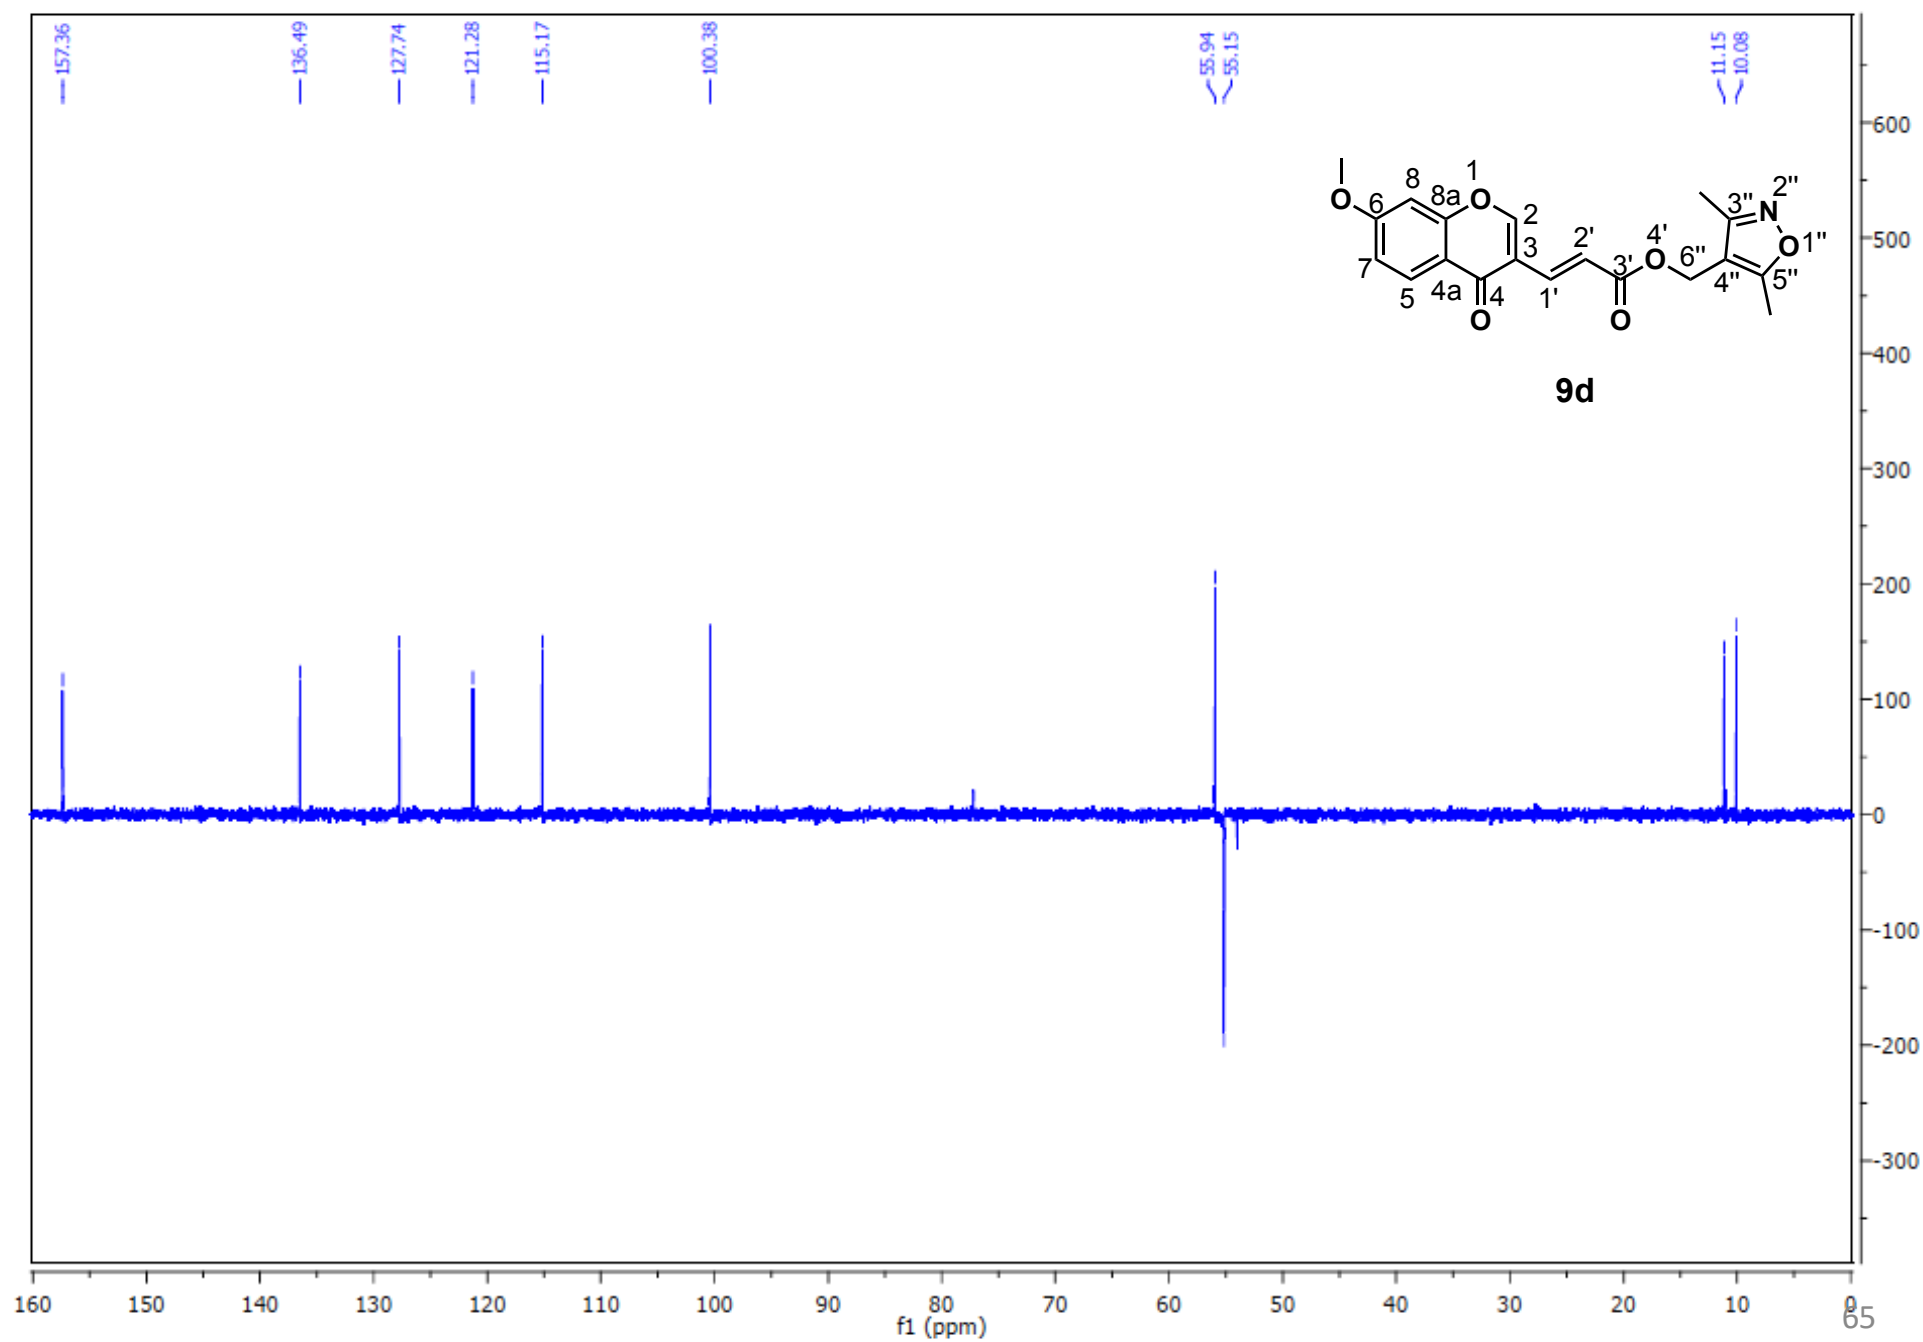

Figure S27.1. Analytical HPLC method 1

Column: C18  
Solvent Flow Rate: 1 mL/min  
Solvent A: Water + 0.1% TFA  
Solvent B: Acetonitrile + 0.1% TFA  
Detection wavelength: 254nm  
Temperature of the column oven: 30°C  
**Gradient Method A1:**

| S. No. | Time  | Solvent B (%) |
|--------|-------|---------------|
| 1      | 0.01  | 10            |
| 2      | 10.00 | 10            |
| 3      | 40.00 | 60            |
| 4      | 42.00 | 100           |
| 5      | 50.00 | 100           |
| 6      | 55.00 | 10            |
| 7      | 60.00 | 10            |
| 8      | 65.00 | STOP          |

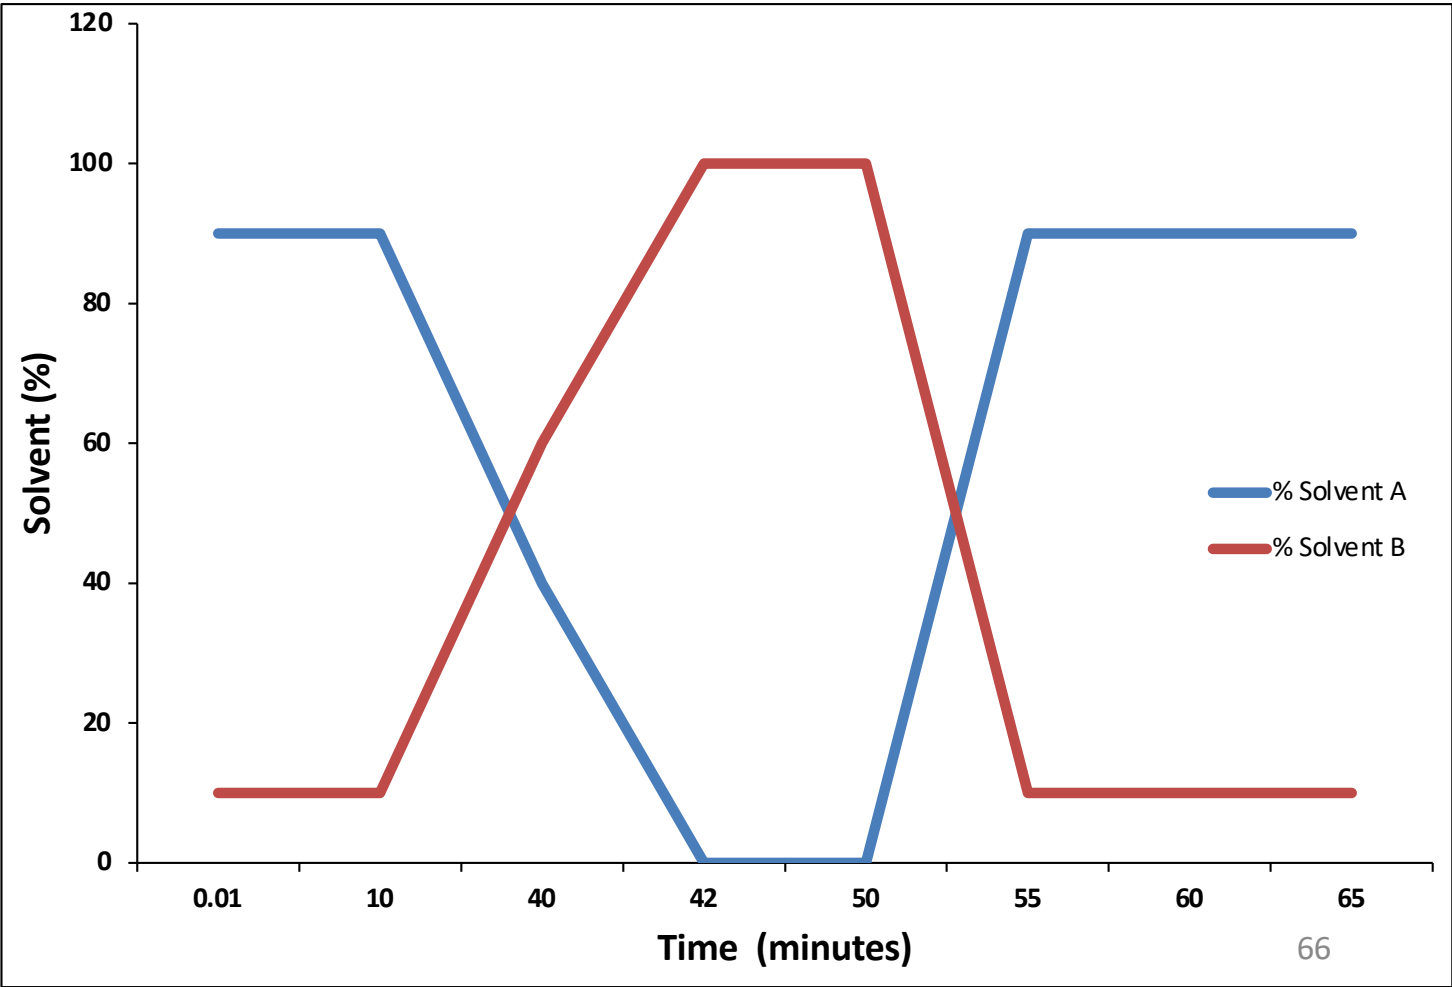

Figure S27.2. Analytical HPLC method 2

Column: C18  
Solvent Flow Rate: 1 mL/min  
Solvent A: Water + 0.1% TFA  
Solvent B: Acetonitrile + 0.1% TFA  
Detection wavelength: 254nm  
Temperature of the column oven: 30°C  
**Gradient Method A1:**

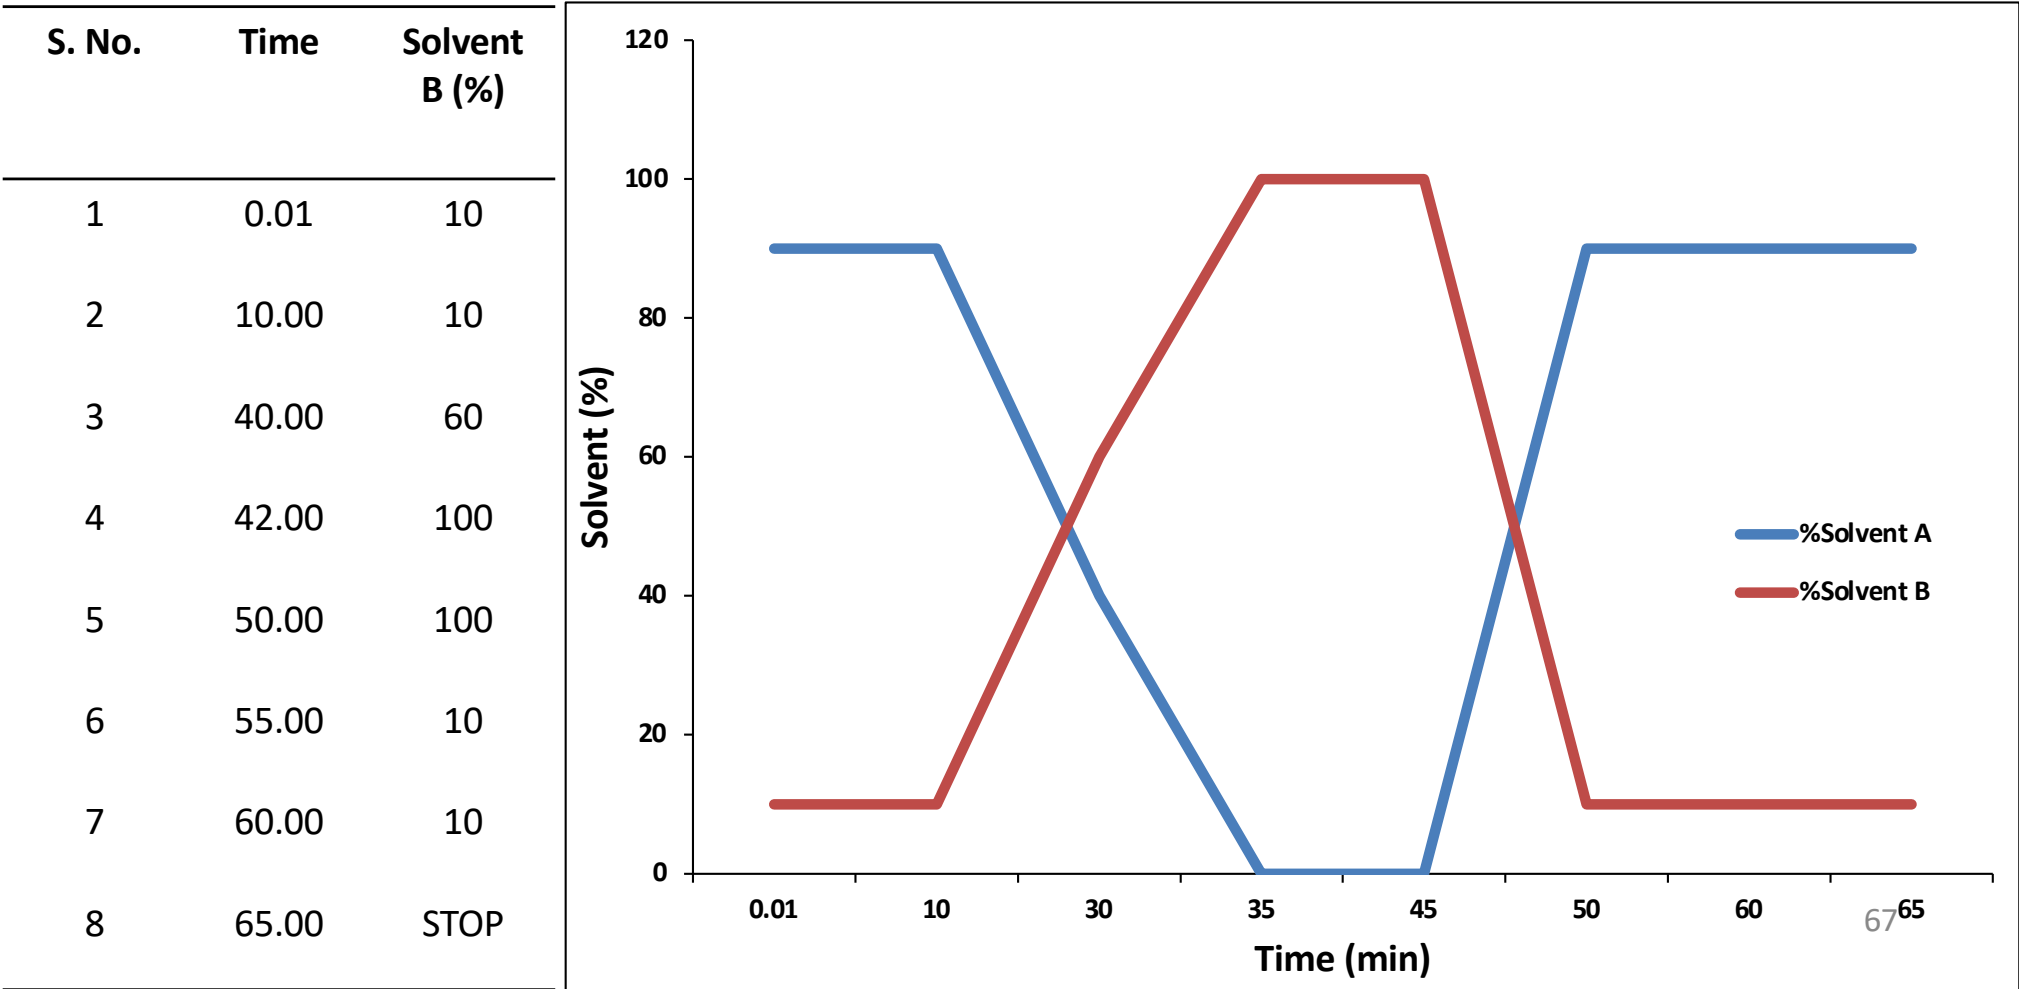

**Figure S27.3. Analytical HPLC of representative compounds 5a and 5b**

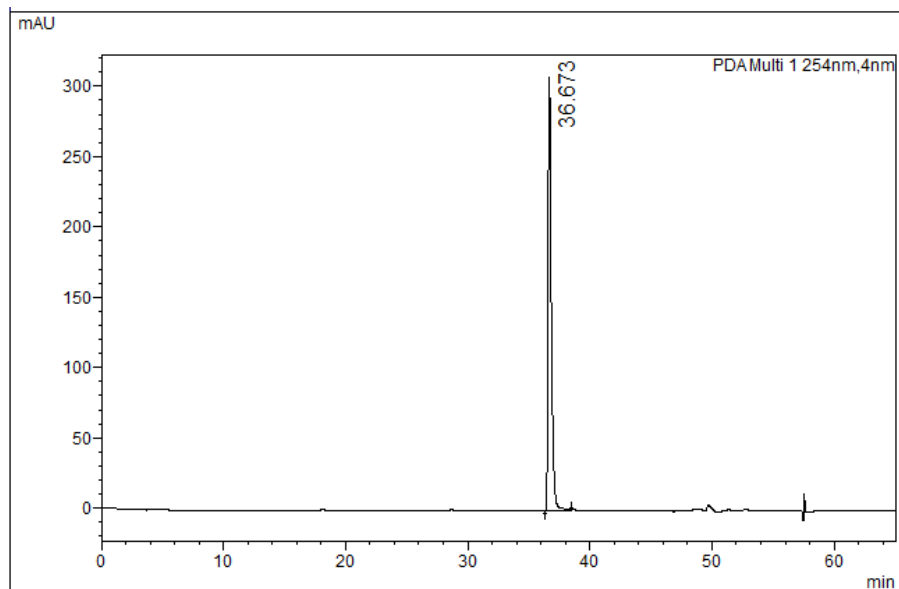

**Analytical HPLC of compound 5a by Method 1**

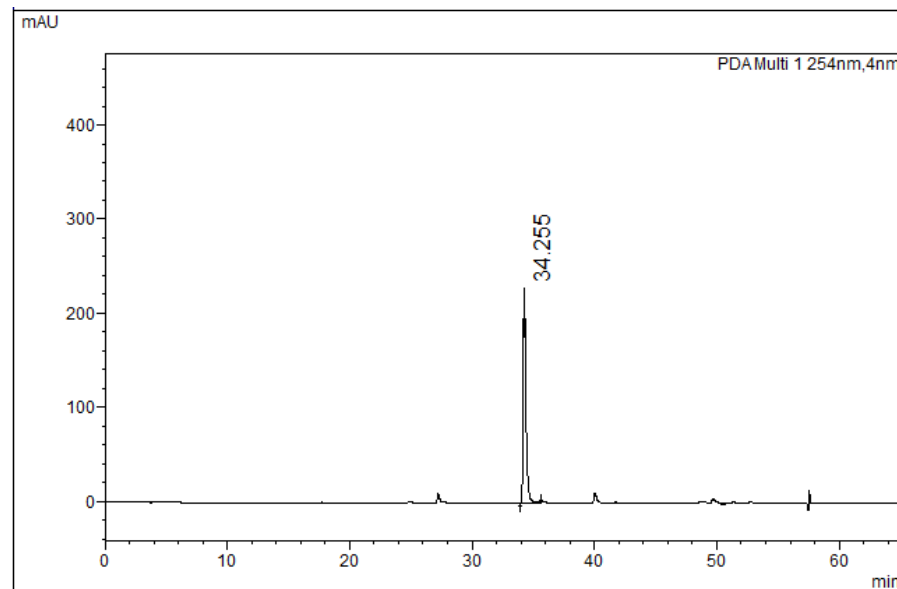

**Analytical HPLC of compound 5b by Method 1**

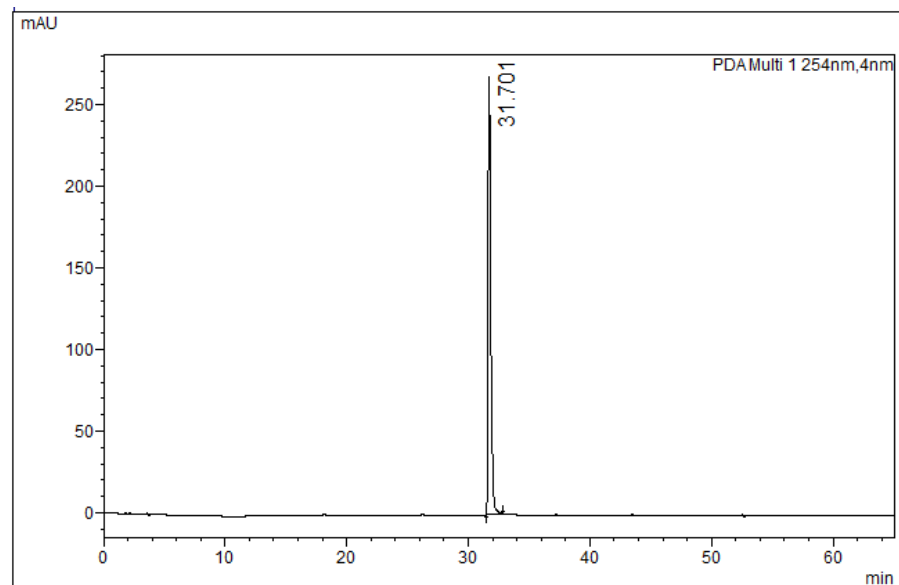

**Analytical HPLC of compound 5a by Method 2**

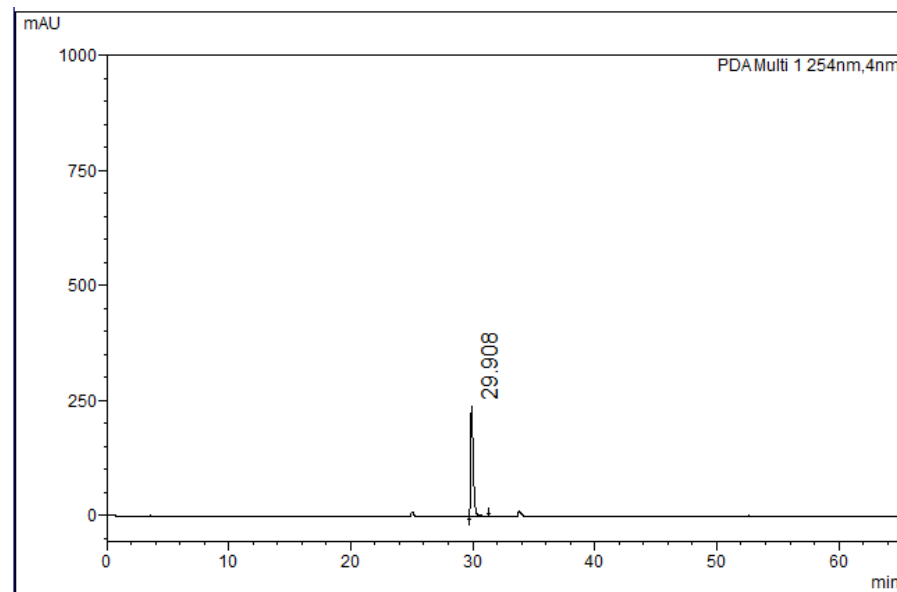

**Analytical HPLC of compound 5b by Method 2**

**Figure S27.4. Analytical HPLC of representative compounds 5c and 5d**

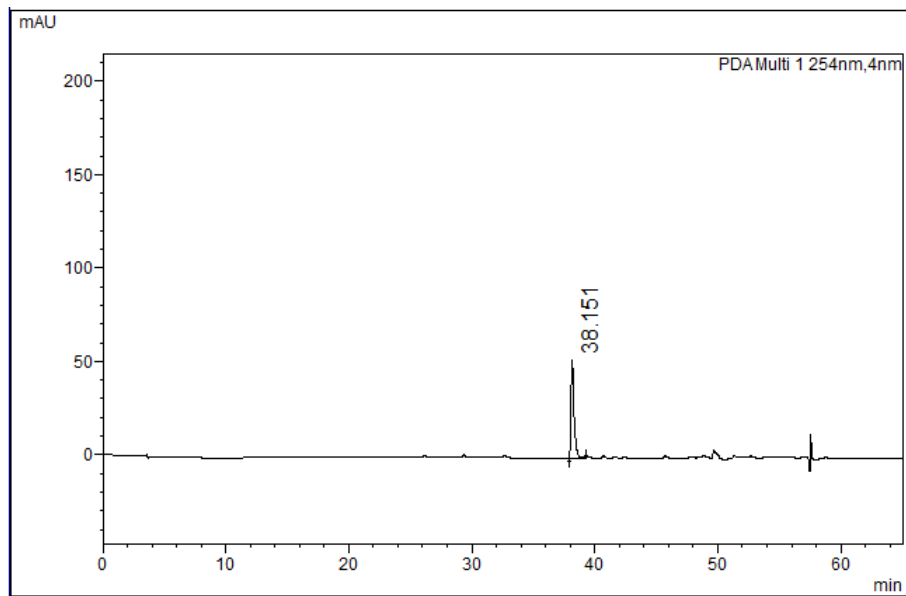

**Analytical HPLC of compound 5c by Method 1**

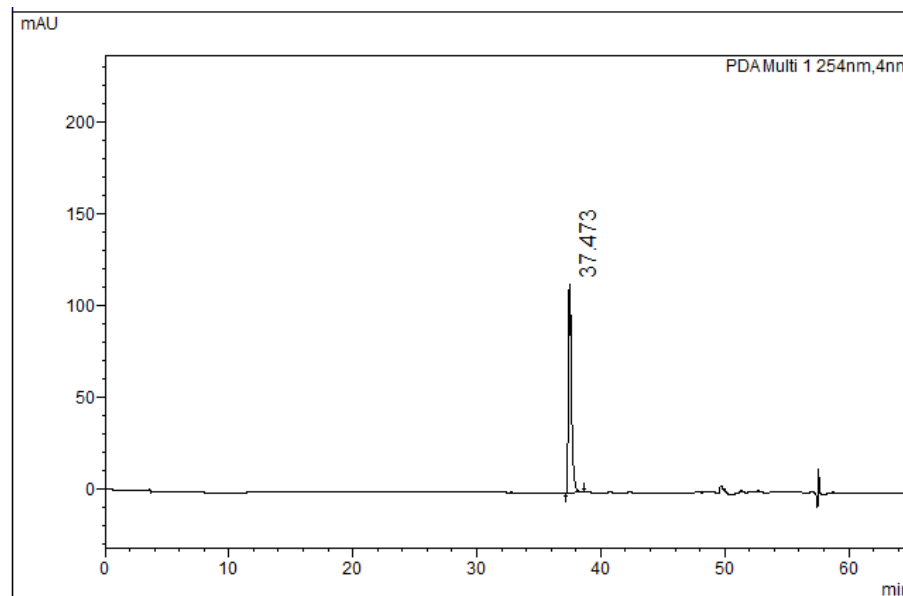

**Analytical HPLC of compound 5d by Method 1**

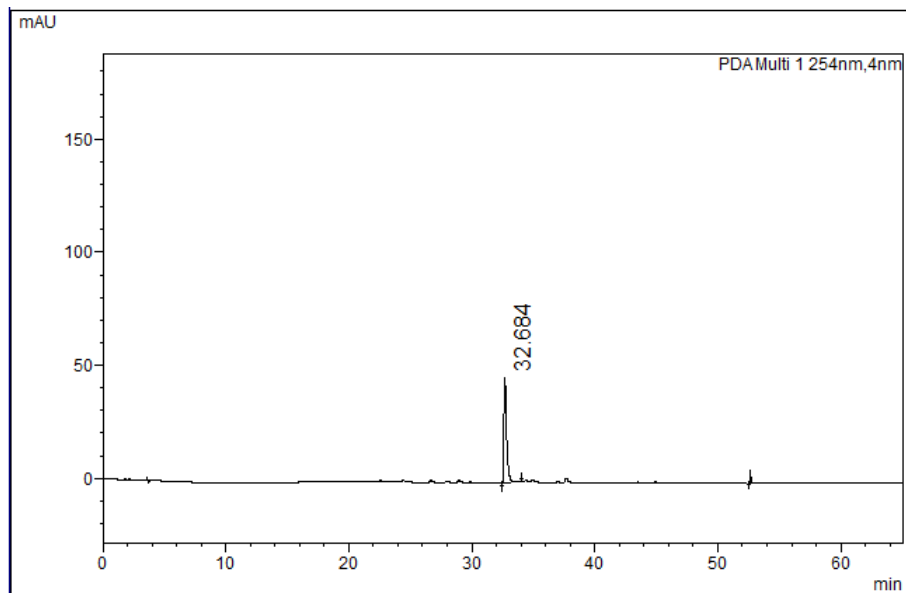

**Analytical HPLC of compound 5c by Method 2**

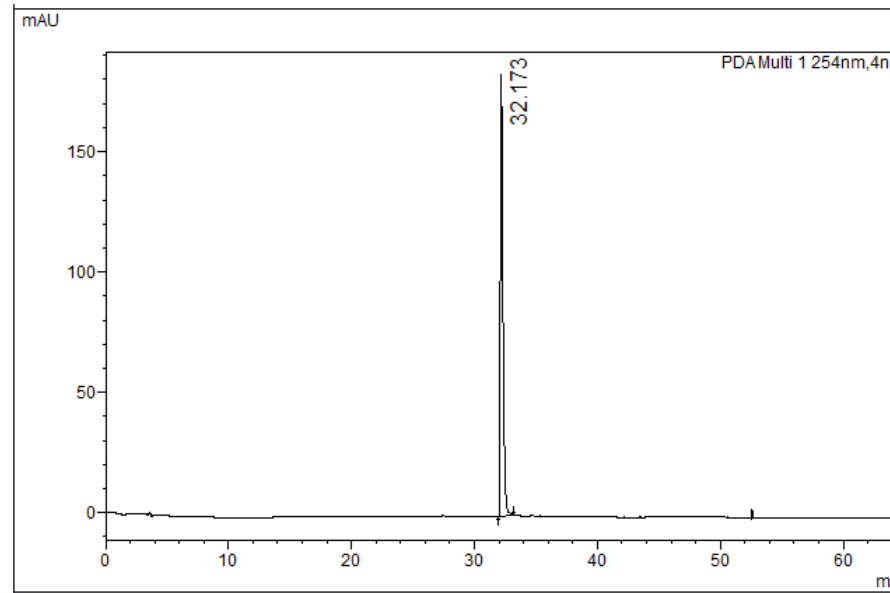

**Analytical HPLC of compound 5d by Method 2**

**Table S1.** HPLC retention time of conjugates **5a-5d** using two different methods.

| Retention time (min) |           |           |
|----------------------|-----------|-----------|
|                      | Method 1* | Method 2* |
| <b>5a</b>            | 36.67     | 31.70     |
| <b>5b</b>            | 34.25     | 29.90     |
| <b>5c</b>            | 38.15     | 32.15     |
| <b>5d</b>            | 37.47     | 32.17     |

\* Method 1 & 2: Different gradient of solvent system used with Solvent A (water + 0.1% TFA) and Solvent B (acetonitrile + 0.1% TFA) with a flow rate of 1 mL/min (cf. Supporting Information for gradient system and HPLC chromatogram).

**Figure S28.1. In-vitro cytotoxicity activity of benzopyran-4-one - isoxazole starting material and intermediates (at a concentration of 25  $\mu$ M) towards human leukemia carcinoma (CCRF-CEM) cell lines.**

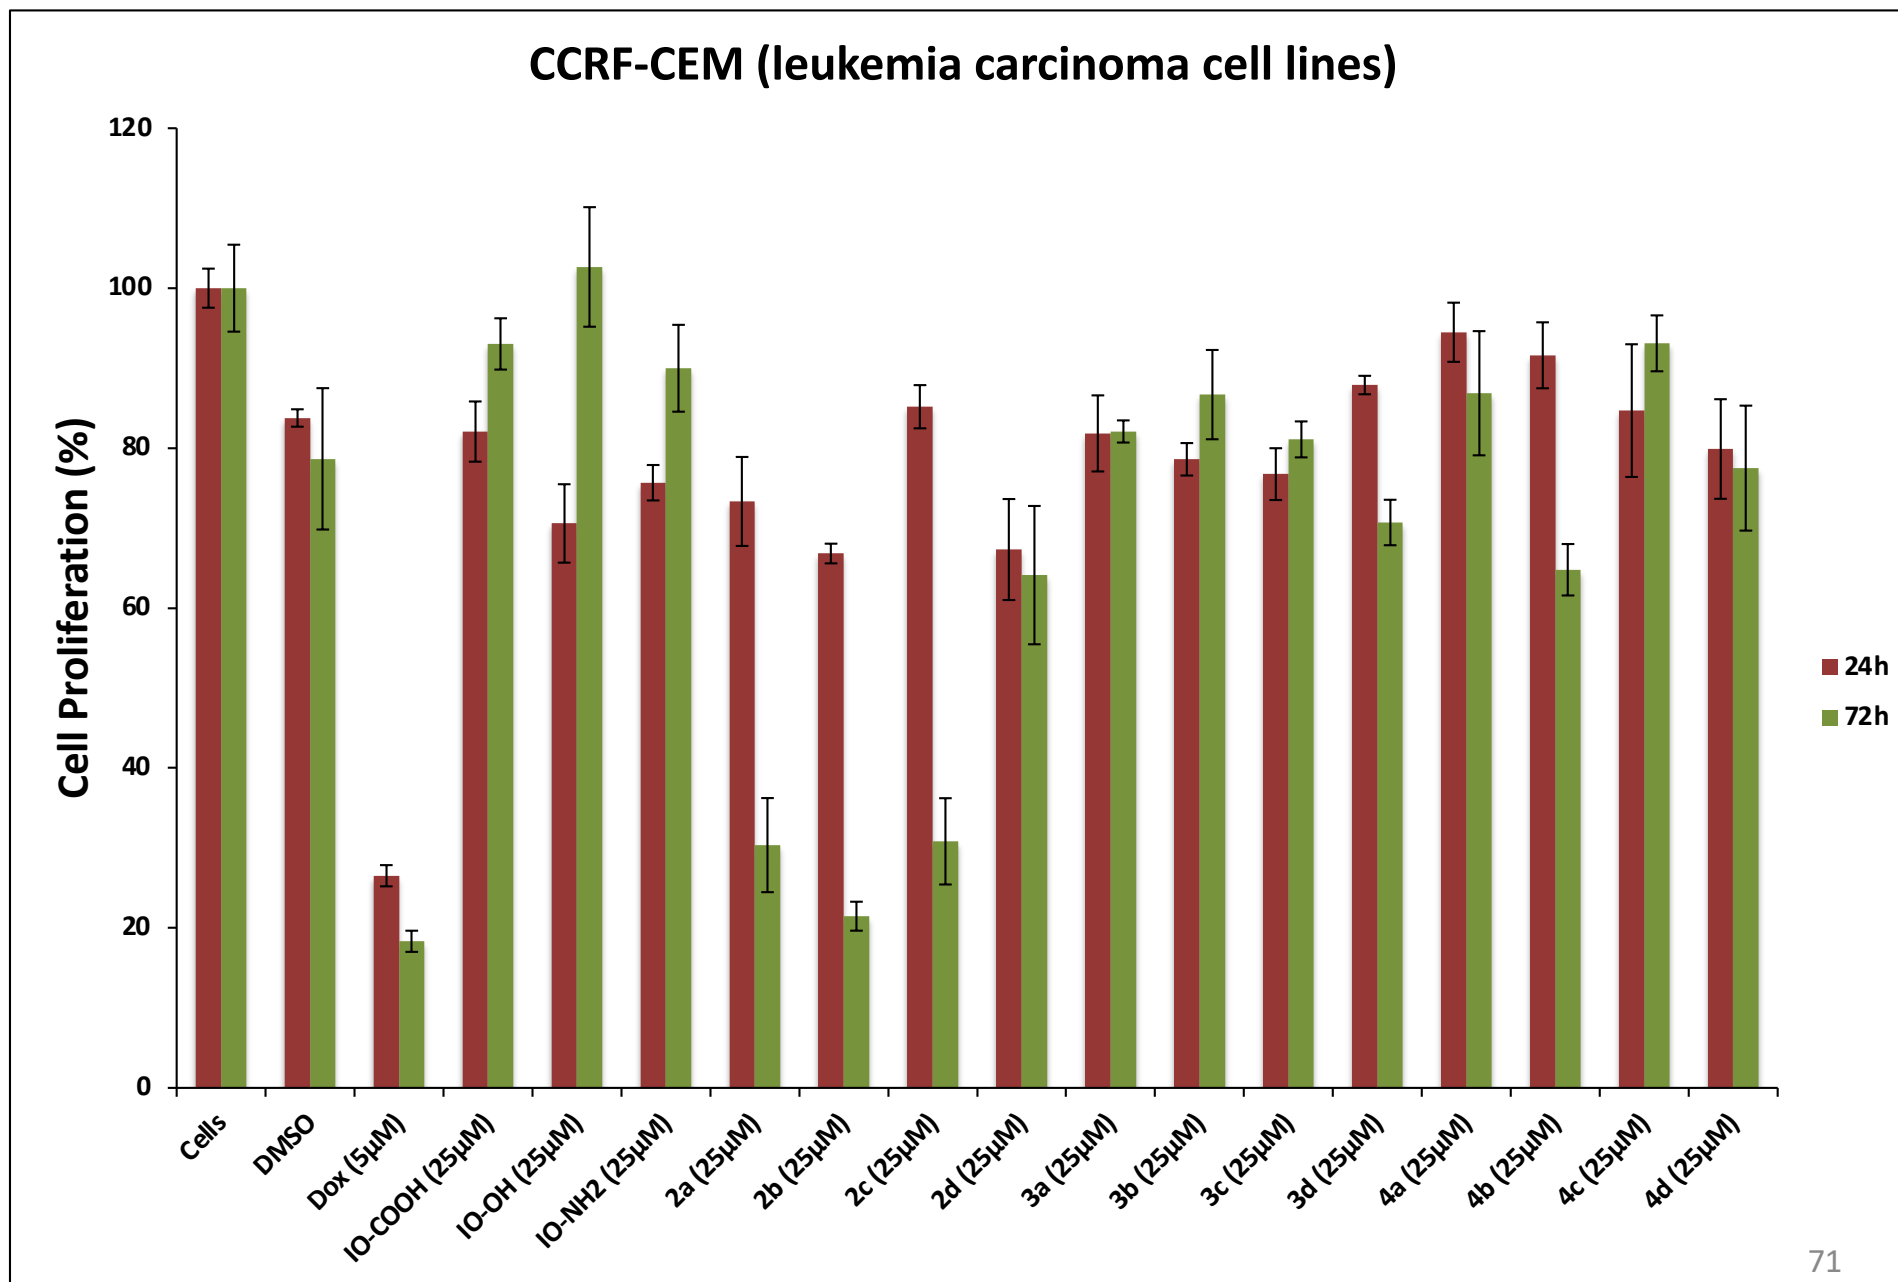

Figure S28.2. In-vitro cytotoxicity activity of benzopyran-4-one - isoxazole starting material and intermediates (at a concentration of 25  $\mu$ M) towards human ovarian adenocarcinoma (SKOV-3) cell lines.

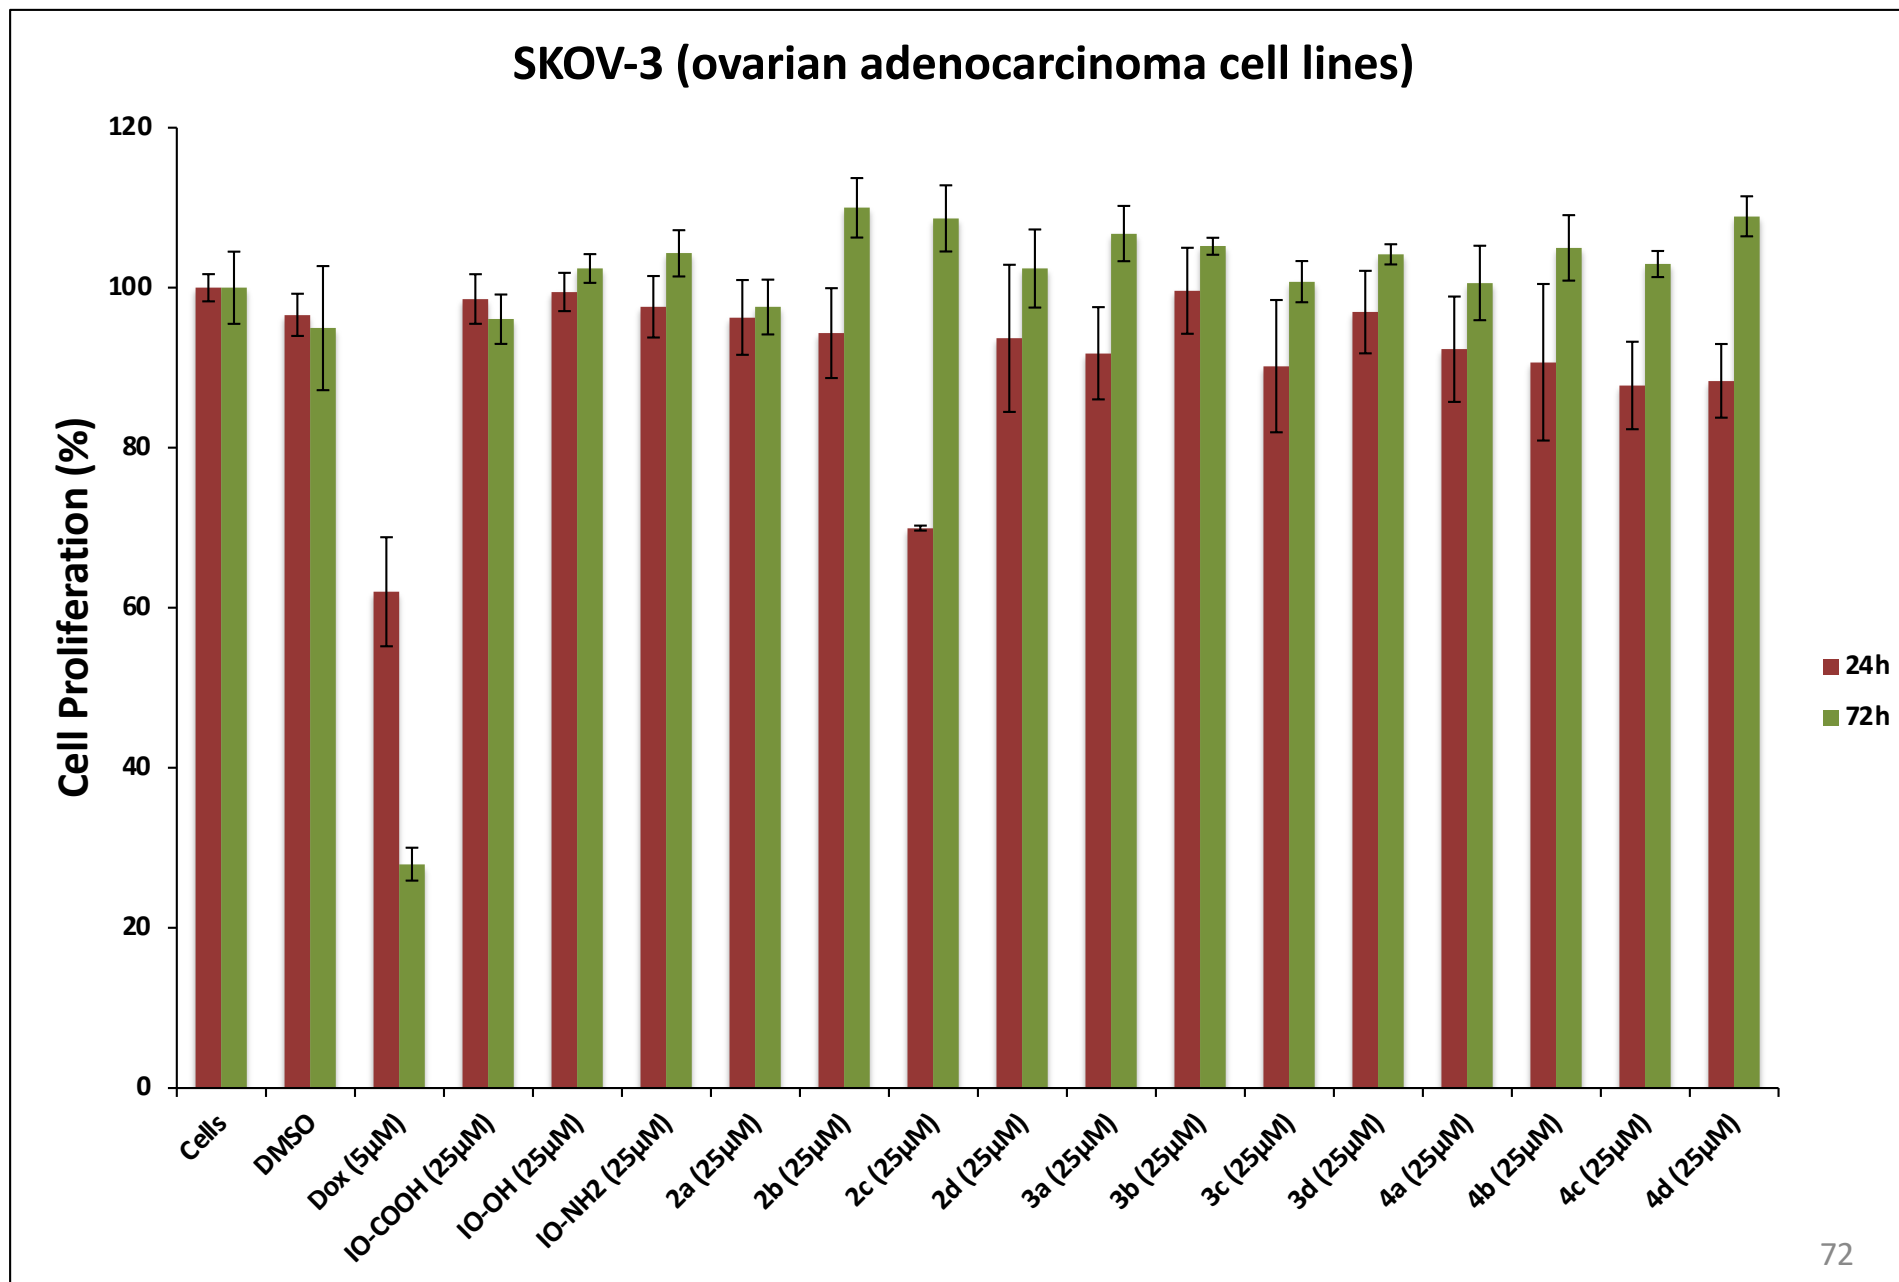



Figure S28.3. In-vitro cytotoxicity activity of benzopyran-4-one - isoxazole starting material and intermediates (at a concentration of 25  $\mu$ M) towards human breast tumor (MDA-MB-231) cell lines.

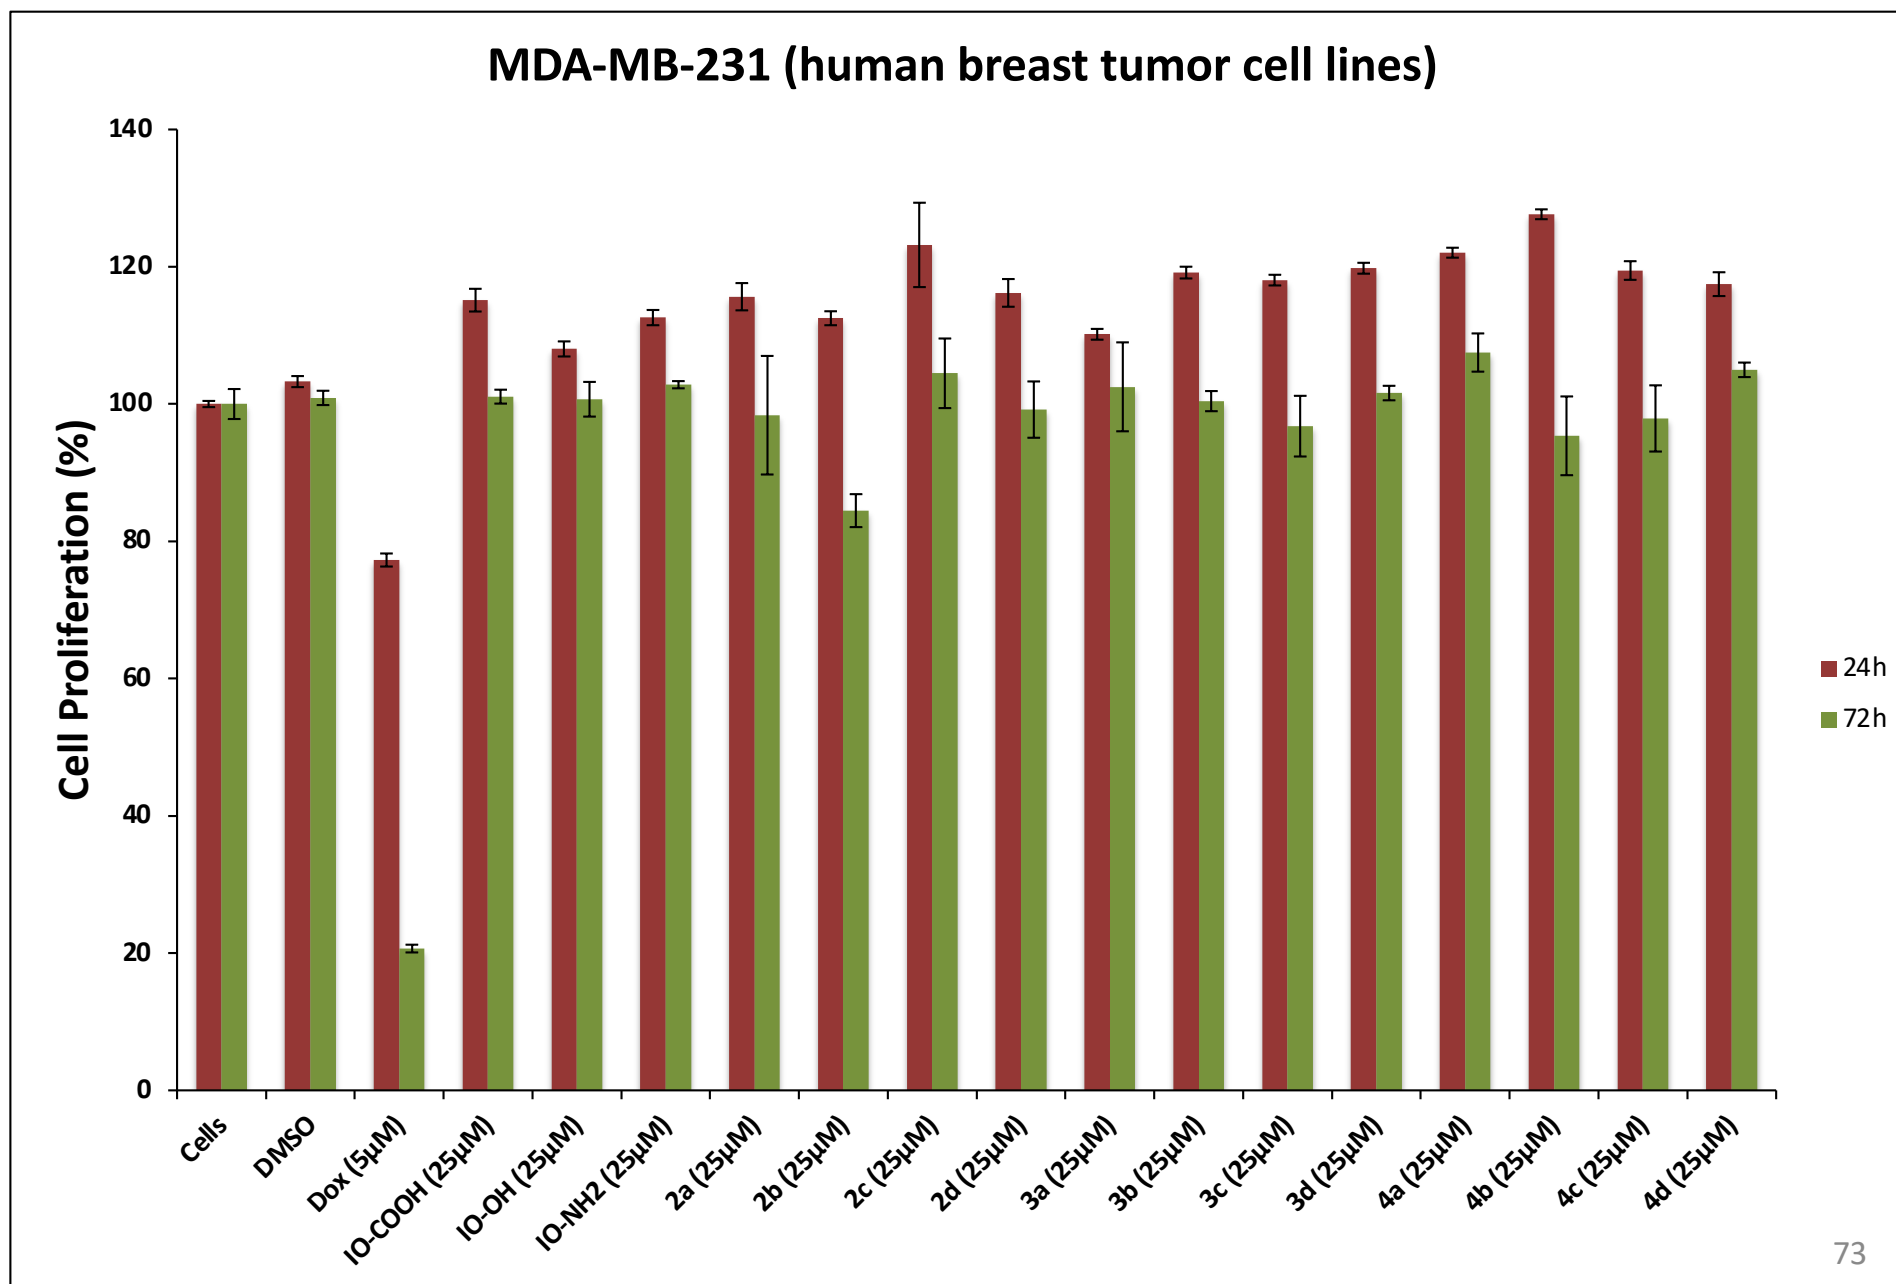

Figure S28.4. In-vitro cytotoxicity activity of benzopyran-4-one - isoxazole starting material and intermediates (at a concentration of 25  $\mu$ M) towards human prostate cancer (PC-3) cell lines.

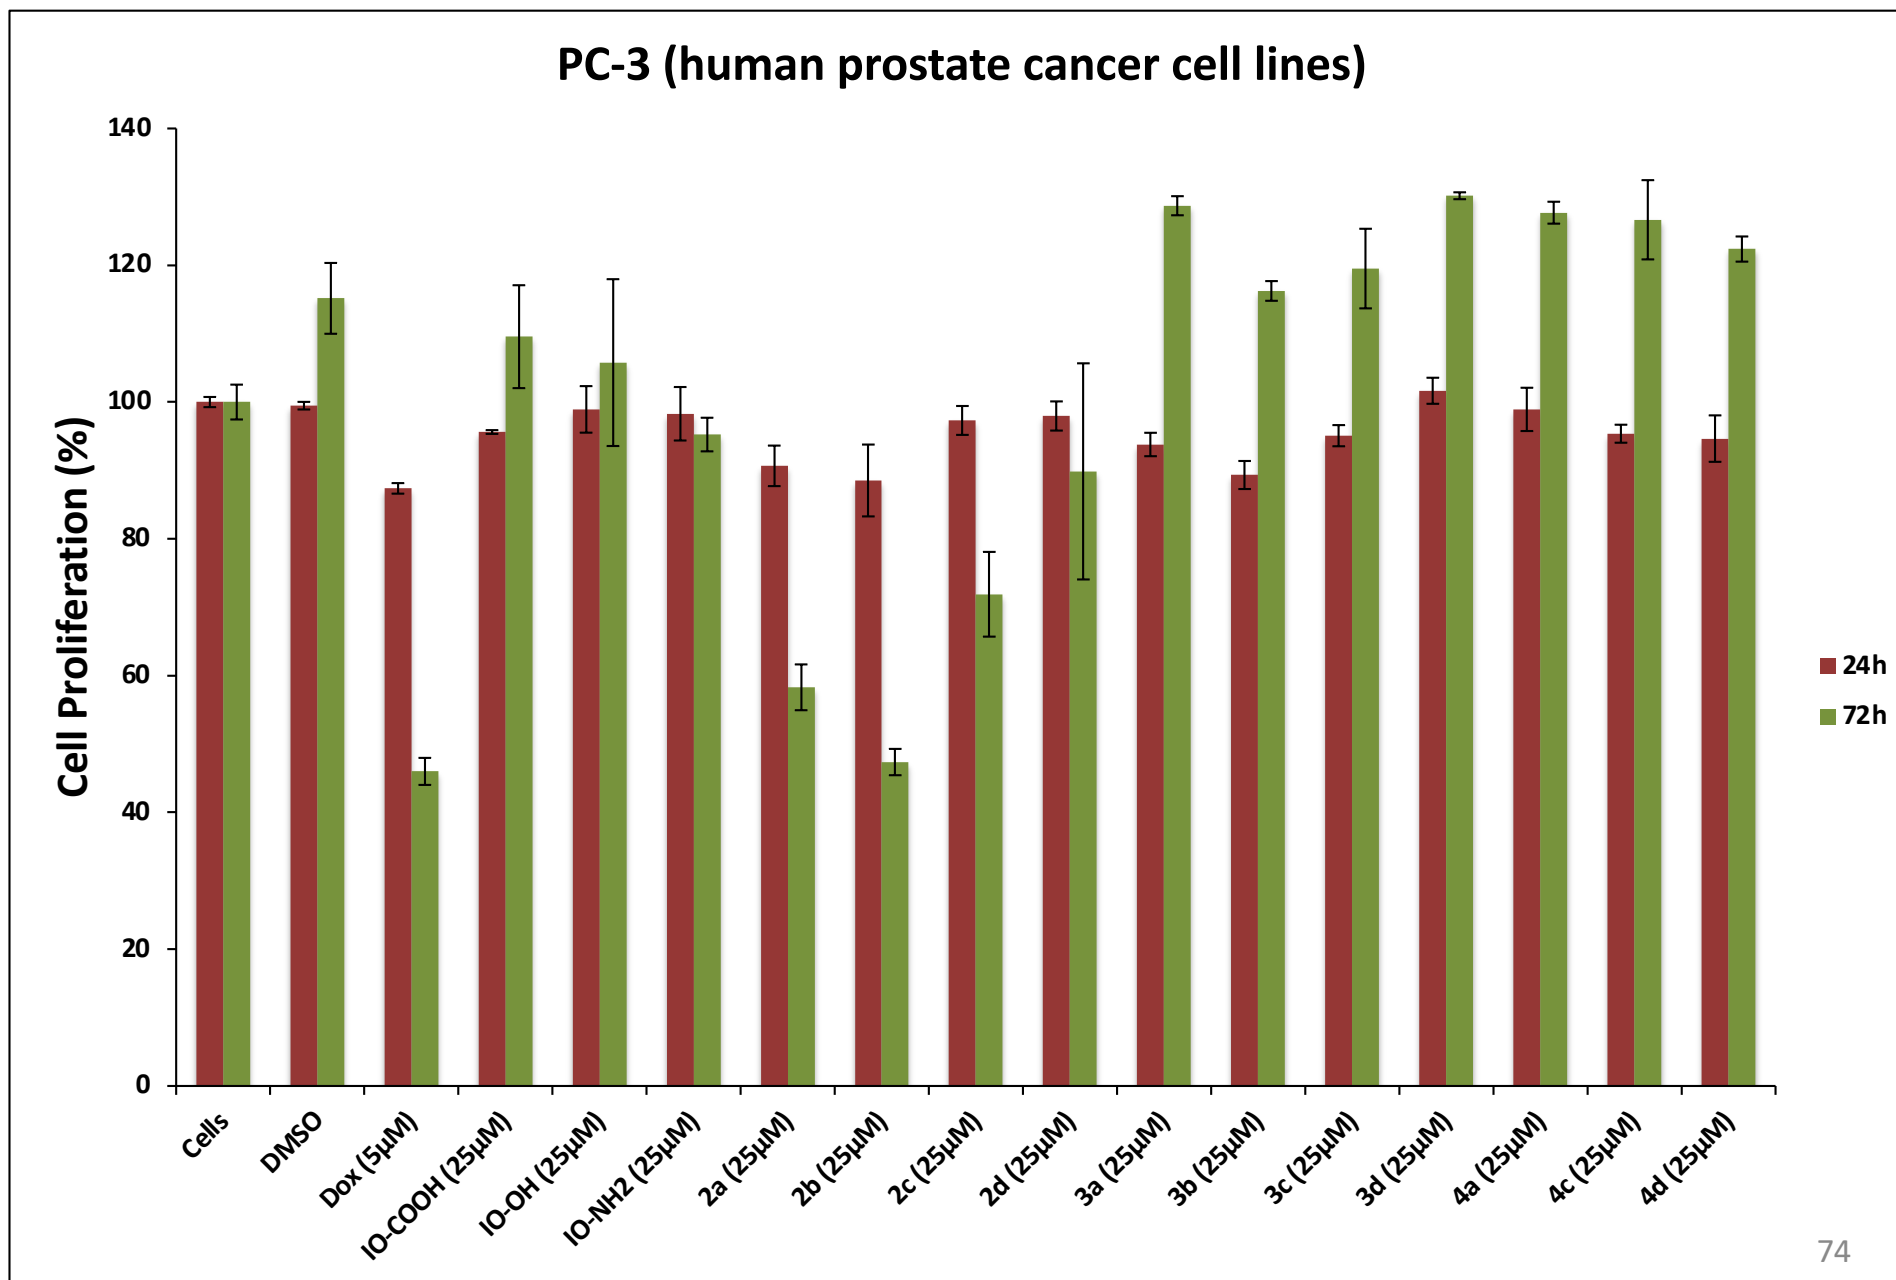

Figure S28.5. In-vitro cytotoxicity activity of benzopyran-4-one - isoxazole starting material and intermediates (at a concentration of 25  $\mu$ M) towards androgen-independent human prostate cancer (DU-145) cell lines.

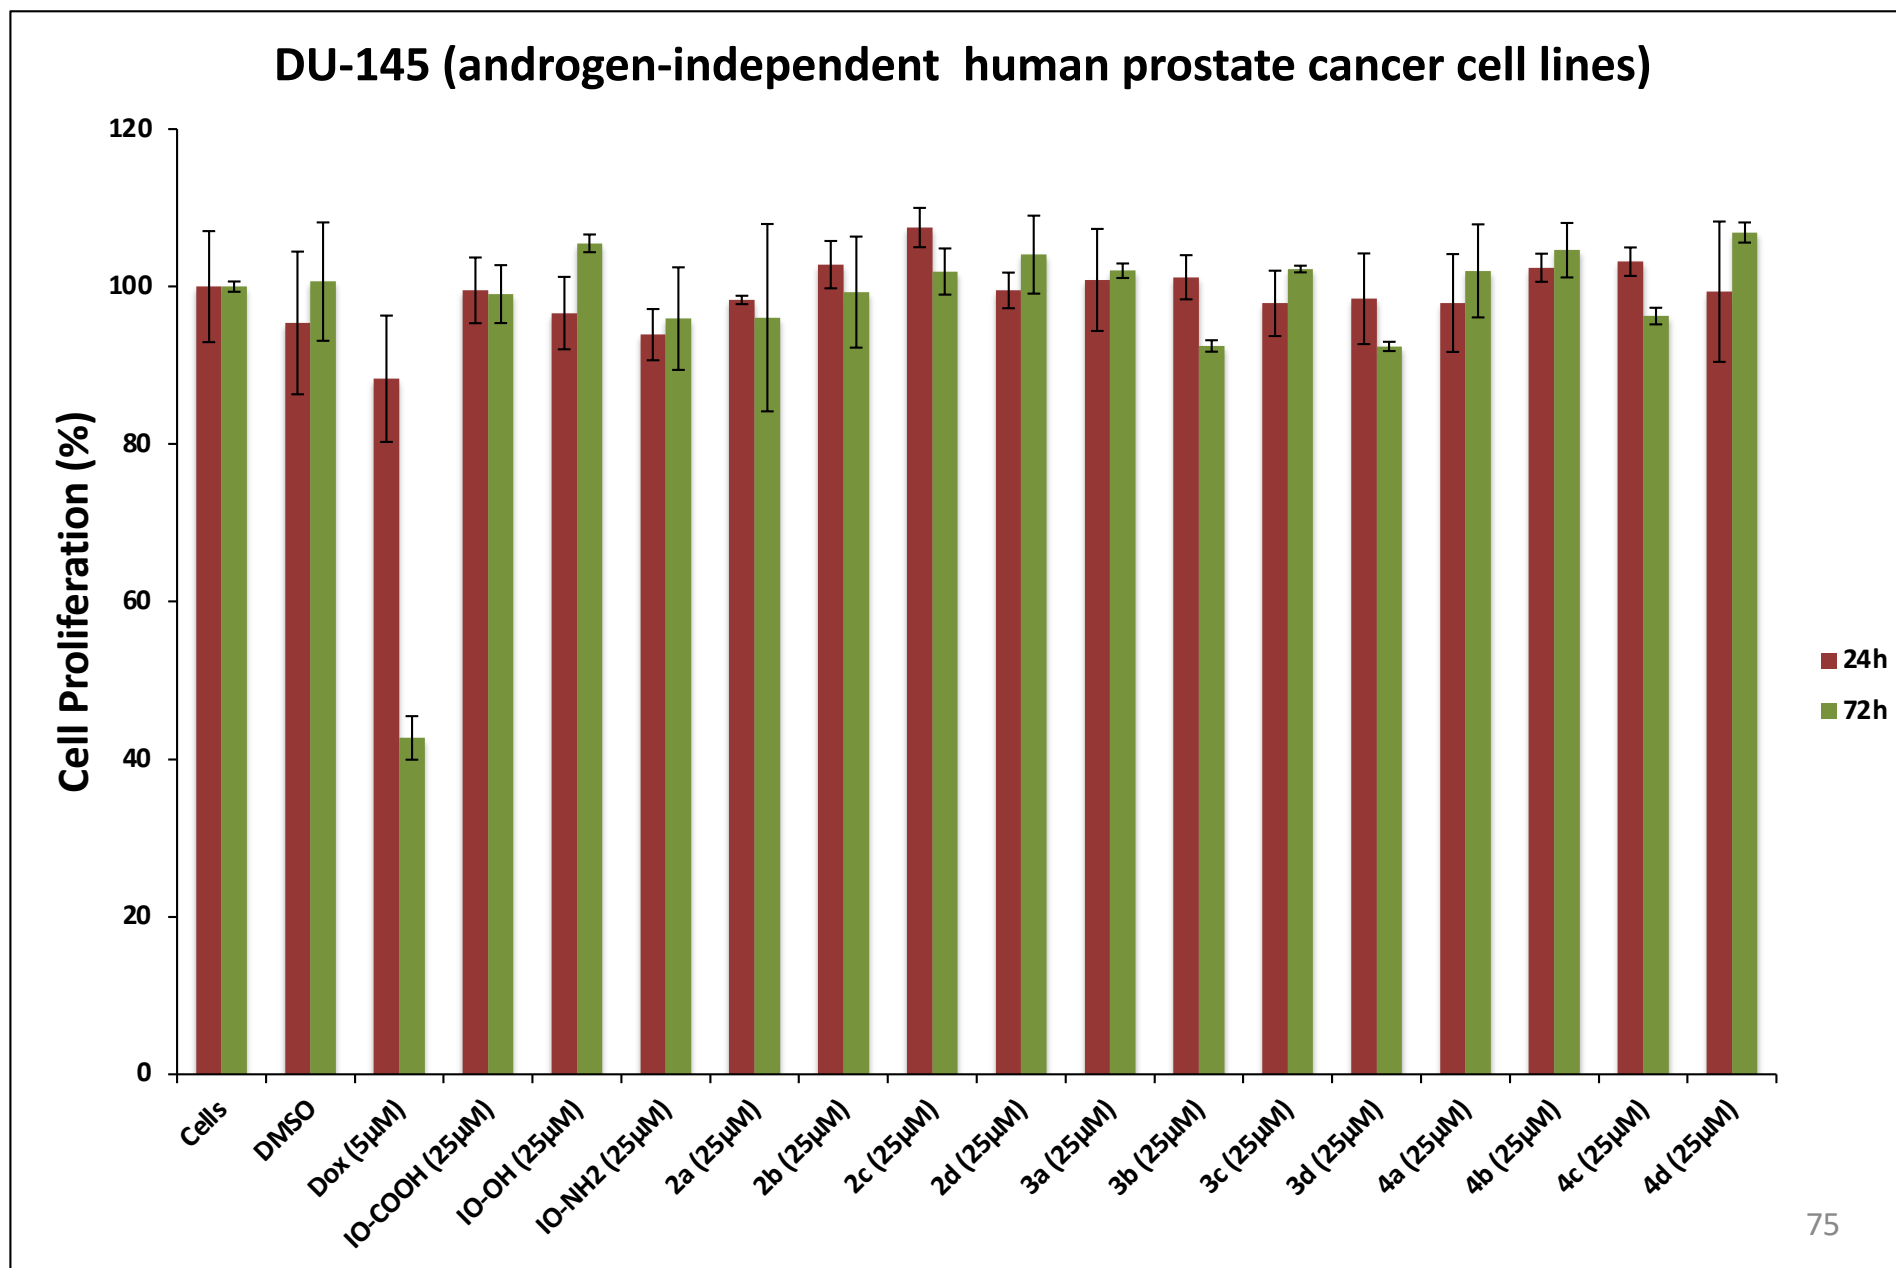

Figure S28.6. In-vitro cytotoxicity activity of benzopyran-4-one - isoxazole starting material and intermediates (at a concentration of 25  $\mu$ M) towards human renal carcinoma (iSLK) cell lines.

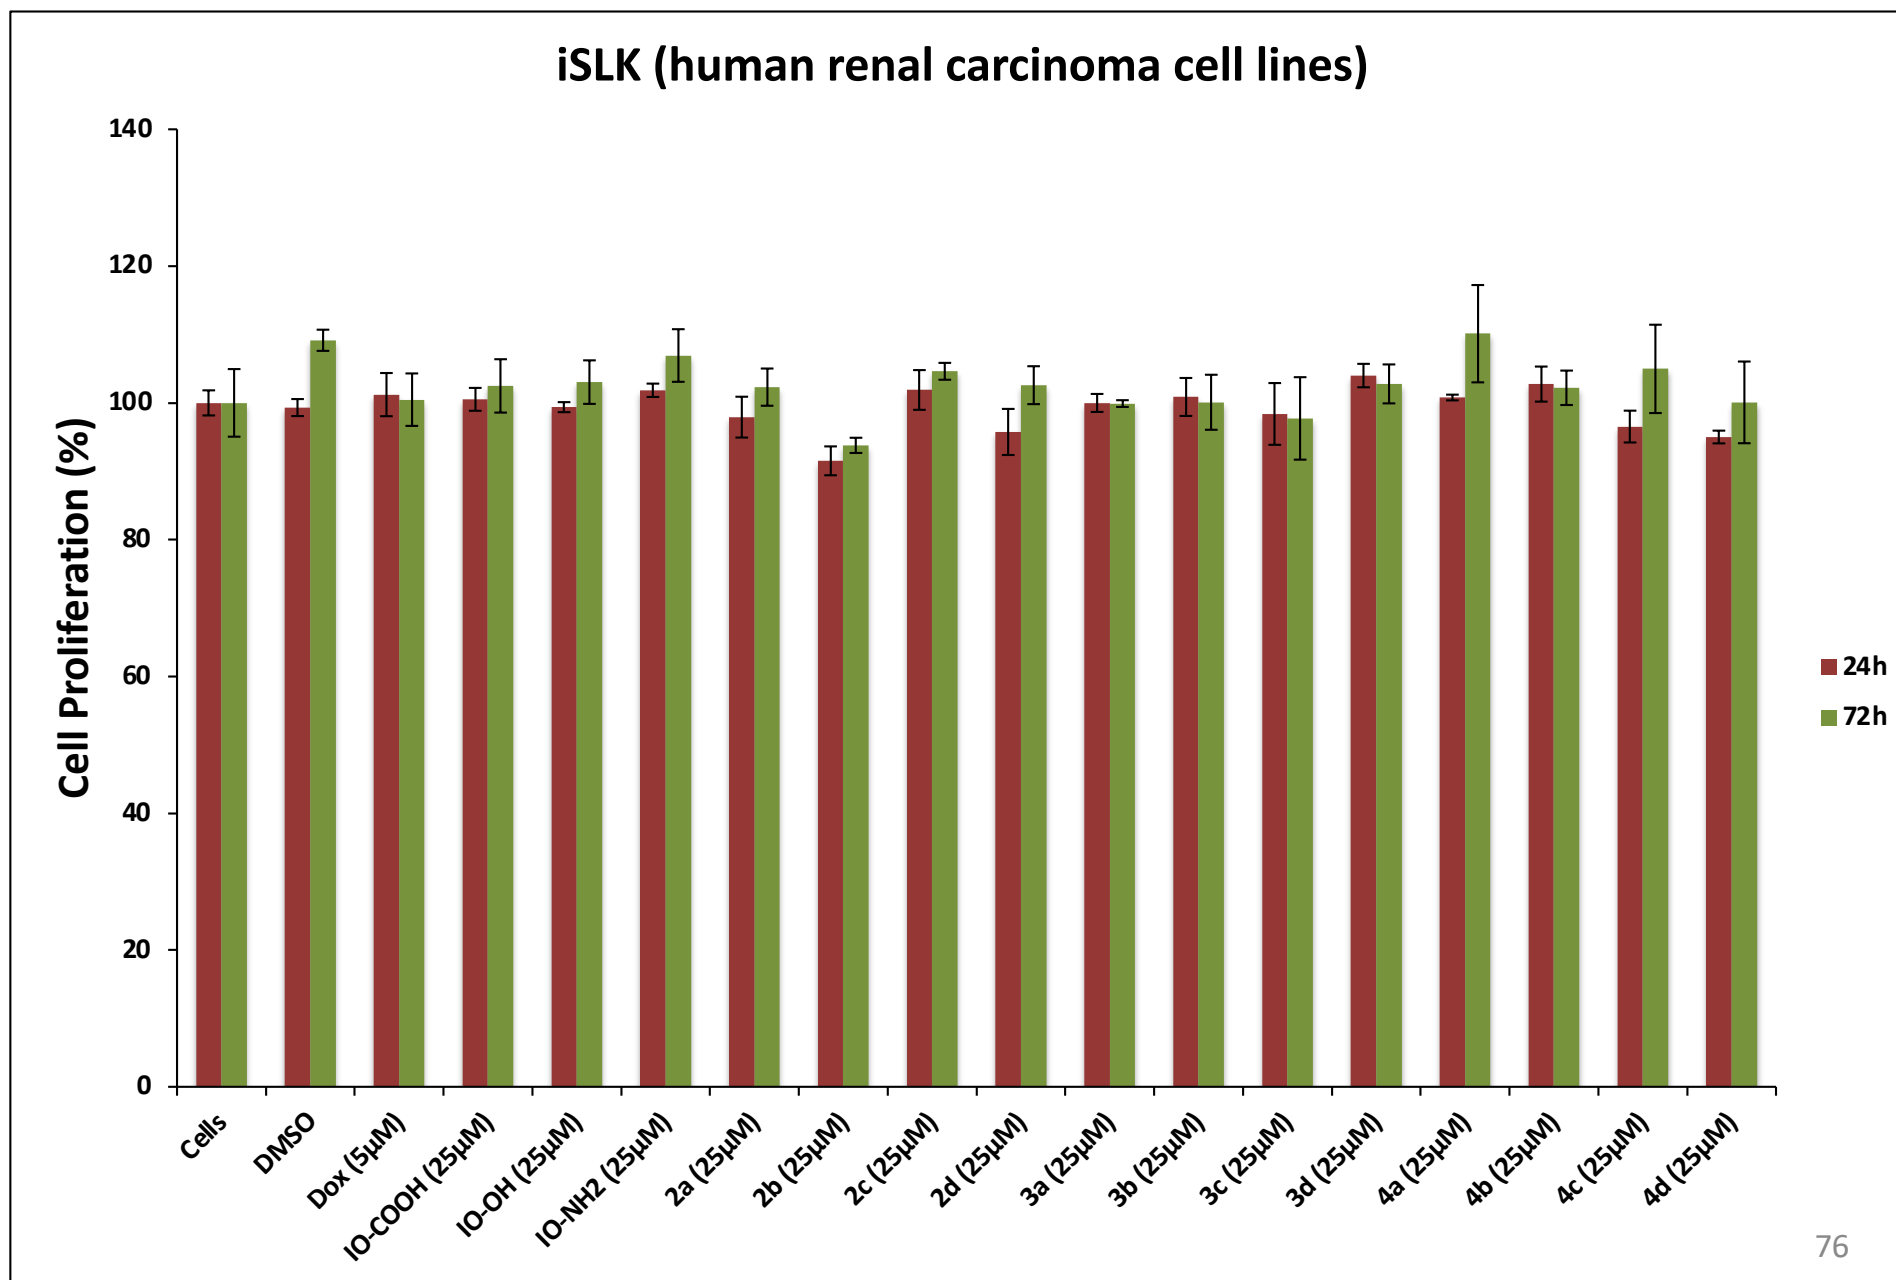

Figure S28.7. In-vitro cytotoxicity activity of benzopyran-4-one - isoxazole starting material and intermediates (at a concentration of 25  $\mu$ M) towards human embryonic kidney (HEK-293) cell lines.

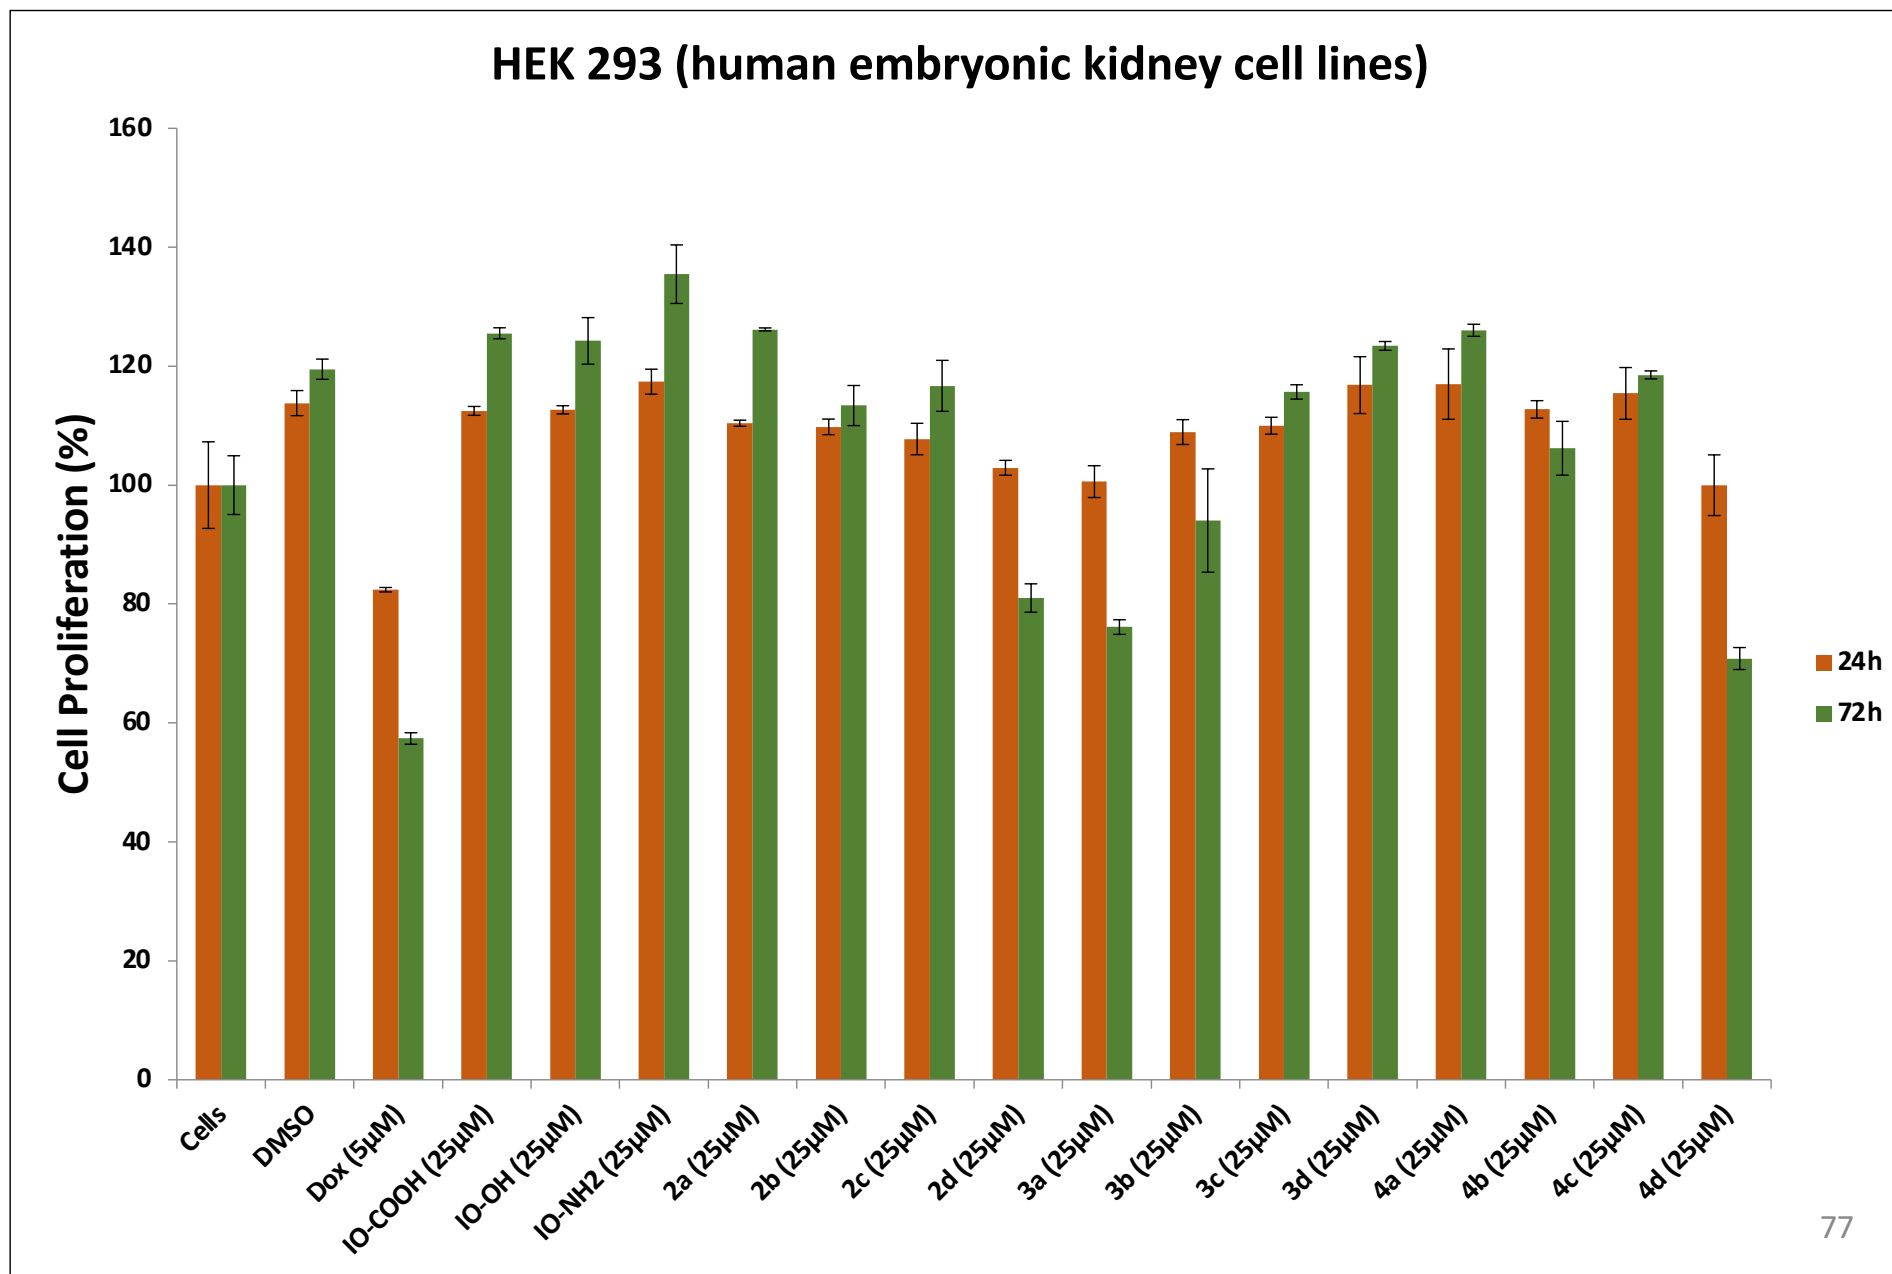

Figure S28.8. In-vitro cytotoxicity activity of benzopyran-4-one - isoxazole starting material and intermediates (at a concentration of 25  $\mu$ M) towards normal mammalian kidney (LLCPK) cell lines.

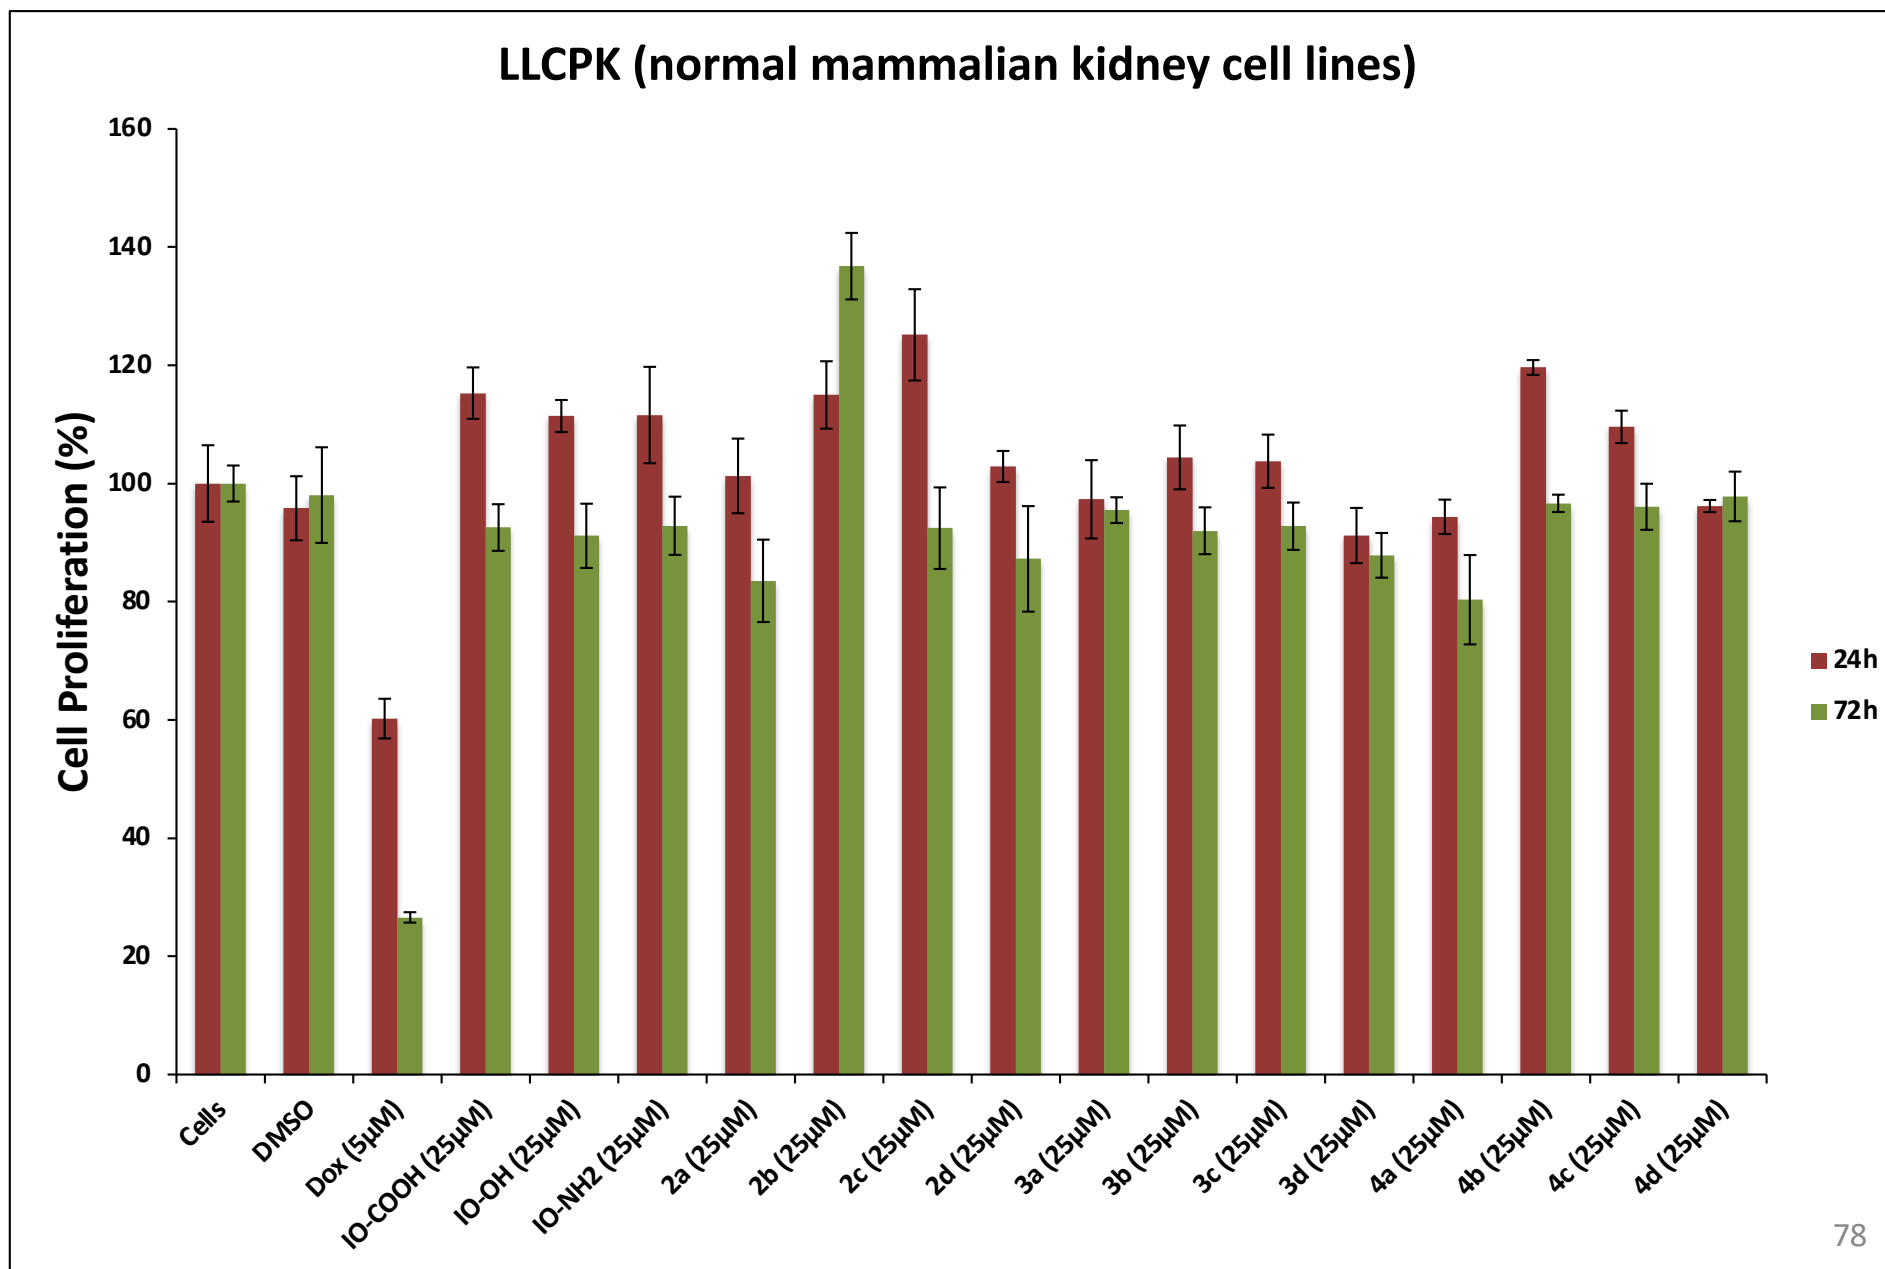

**Table S2.** Percentage antiproliferative activity on treatment with Dox (at a concentration of 5  $\mu$ M) and conjugates **5a-5d** (at a concentration of 25  $\mu$ M) 72 h of incubation.

| Inhibition of Cancer Cell Lines (% , 72 h) |          |        |      |      |        |      |
|--------------------------------------------|----------|--------|------|------|--------|------|
| Compounds                                  | CCRF-CEM | SKOV-3 | MDA- | PC-3 | DU-145 | iSLK |
| No.                                        | MB-231   |        |      |      |        |      |
| <b>Dox</b>                                 | 82       | 62     | 73   | 54   | 57     | NIL  |
| <b>5a</b>                                  | 81       | 69     | 78   | 70   | 73     | 44   |
| <b>5b</b>                                  | 83       | 42     | 60   | 75   | 50     | 23   |
| <b>5c</b>                                  | 83       | 45     | 70   | 74   | 81     | 31   |
| <b>5d</b>                                  | 82       | 48     | 76   | 75   | 79     | 42   |

**Table S3.** Percentage anti-proliferative activity of non-cancerous cell lines on treatment with doxorubicin (at a concentration of 5  $\mu$ M) and conjugates 5a-5d (at a concentration of 25  $\mu$ M).

| Inhibition of Non-Cancerous Cell Lines (% , 72 h) |         |       |
|---------------------------------------------------|---------|-------|
| Compounds No.                                     | HEK 293 | LLCPK |
| Dox                                               | 43      | 74    |
| 5a                                                | 37      | 57    |
| 5b                                                | 34      | NIL   |
| 5c                                                | 38      | NIL   |
| 5d                                                | 40      | 18    |



# Figure S29.1 HPLC data comparison for Standard Curve of 5a

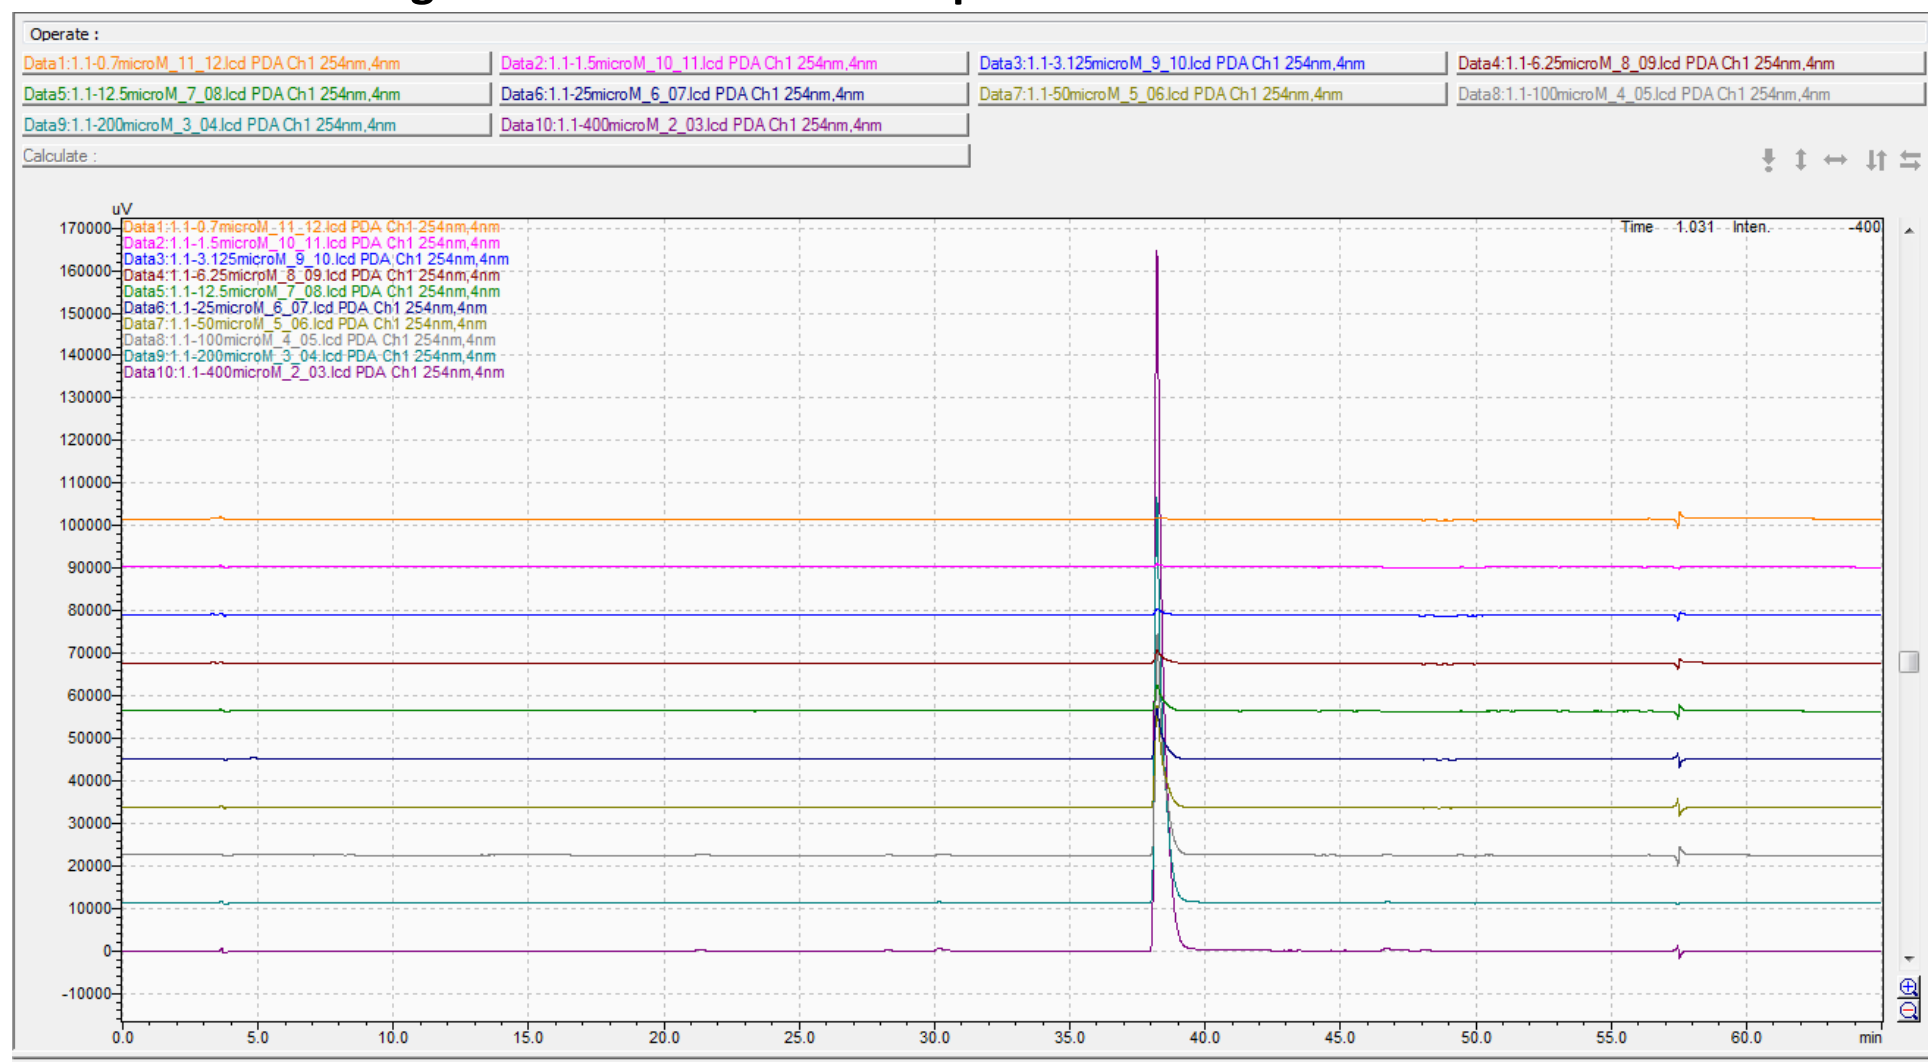

| Conc. 5a (µM)  | 400     | 200     | 100     | 50     | 25     | 12.5   | 6.25  | 3.12  | 1.56  | 0.78 |
|----------------|---------|---------|---------|--------|--------|--------|-------|-------|-------|------|
| AUC (at 254nm) | 3239256 | 1892892 | 1034689 | 482517 | 236578 | 122631 | 59281 | 28929 | 14181 | 4769 |

Figure S29.2 Plot of area under the curve vs. conc. of 5a

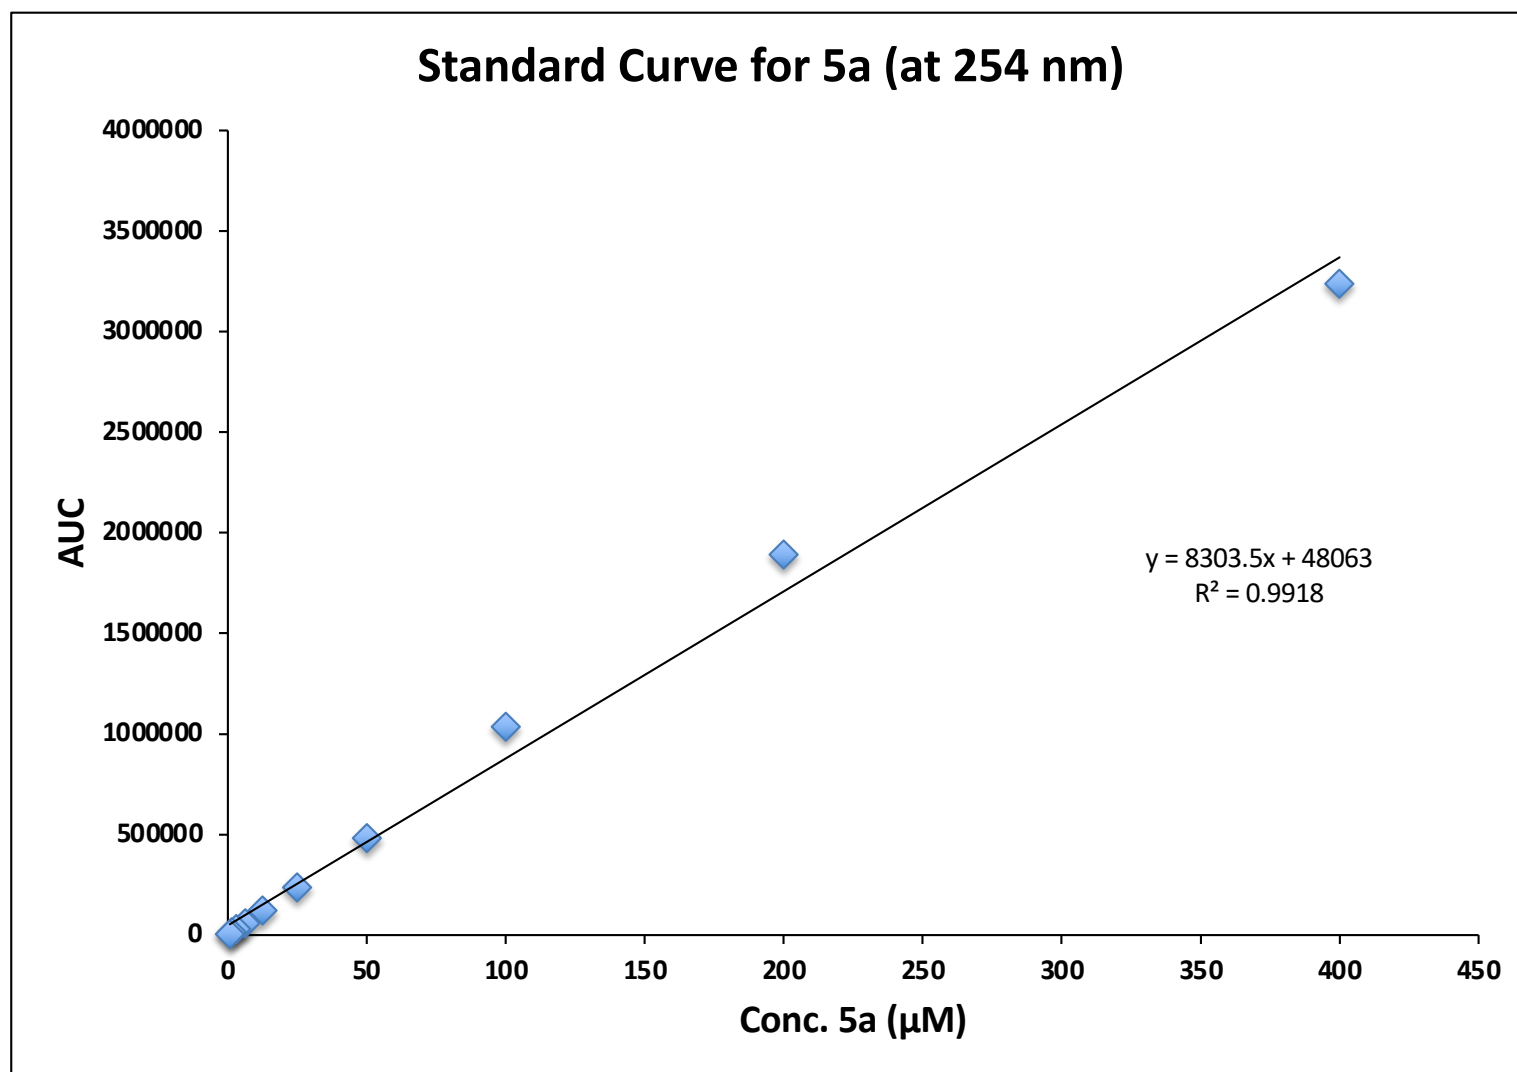

**Table S4. Decrease in conc. of 5a on incubation with human serum at different time points (set of 3 independent experiments)**

|            | Conc 5a ( $\mu$ M) |        |        |             |             |              |
|------------|--------------------|--------|--------|-------------|-------------|--------------|
| Time (min) | Expt 1             | Expt 2 | Expt 3 | Average     | Std dev     | ln (average) |
| 0          | 76,84              | 81,37  | 84,65  | 100         | 3,921636563 | 4,605170186  |
| 2          | 64,28              | 54,99  | 50,4   | 69,86329575 | 7,071381289 | 4,246540415  |
| 5          | 52,92              | 51,81  | 58,93  | 67,38861899 | 3,830722299 | 4,210476146  |
| 10         | 40,01              | 43,71  | 42,37  | 51,91880098 | 1,873285883 | 3,949680978  |
| 20         | 34,49              | 24,27  | 34,58  | 38,4336655  | 5,926671354 | 3,648933781  |
| 40         | 18,56              | 11,93  | 8,4    | 16,01334103 | 5,158219977 | 2,773422189  |
| 80         | 9,63               | 0,8    | 8,3    | 7,712262212 | 4,760738738 | 2,042811557  |

### Calculation of Half life of 5a in Human serum stability

$y = -0.031x + 4.3339$ , where  $y = \ln \text{conc. of 5a}$  and  $x = \text{time (minutes)}$

$$X = (y - 4.3339) / -0.031$$

For  $t_{1/2}$

$$x_{1/2} = (\ln 50 - 4.3339) / -0.031$$

$$= (3.912 - 4.3339) / -0.031$$

$$= 13.609 \text{ min}$$

**Figure S30.** A plot of human serum stability of **5a** is plotted as a logarithm of conc. of **5a** ( $\mu\text{M}$ ) vs. time in minutes.

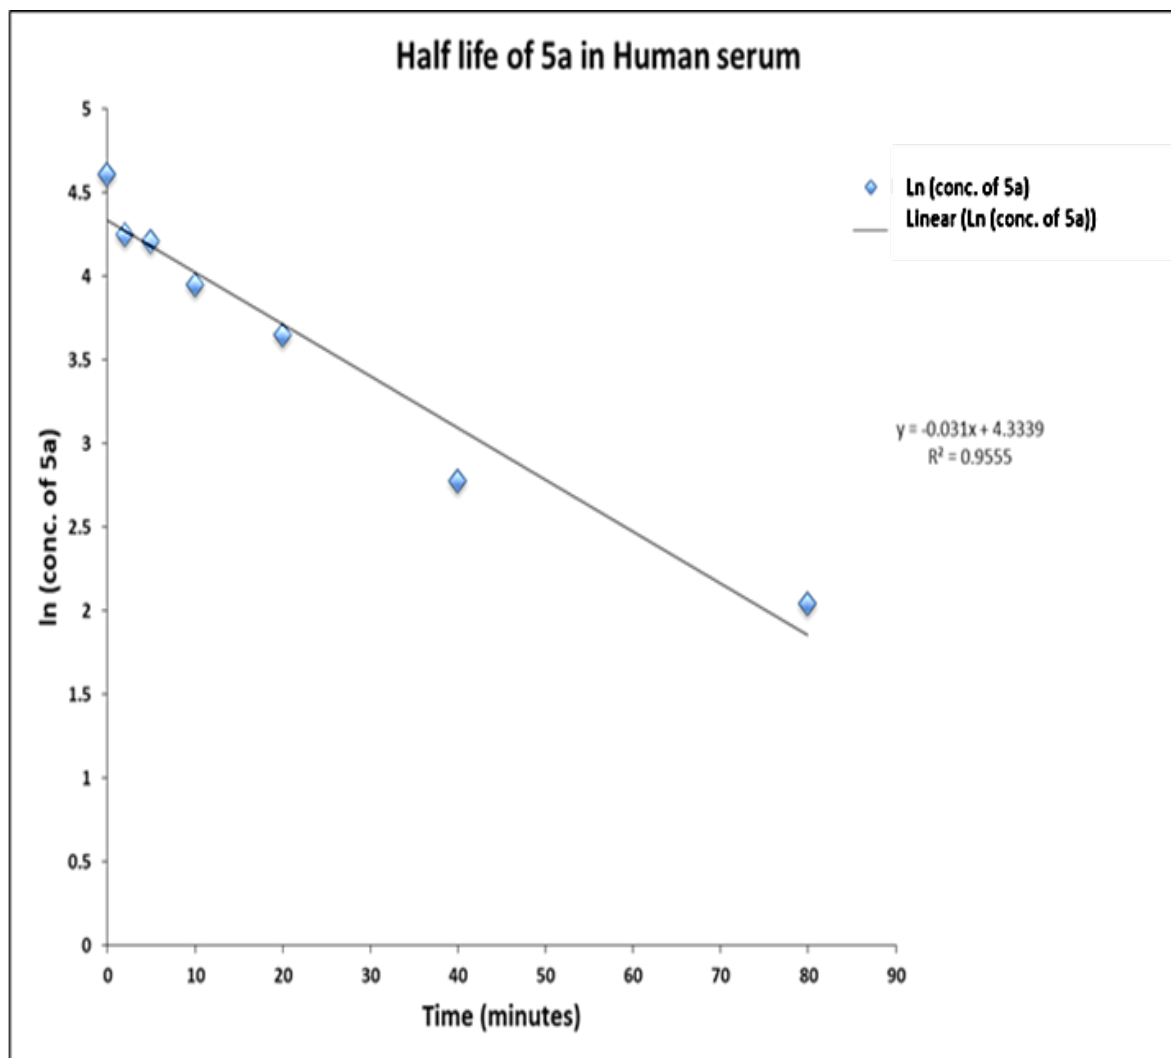

Supplement: s1 [file s1]
